# Supplementary material for: An efficient platform for decarboxylative functionalization of carboxylic acids using sulfuryl fluoride: Pd-catalyzed decarboxylative dehydrogenation of alkanecarboxylic acids and decarboxylative cross-coupling of arenecarboxylic acids
Source: Royal Society of Chemistry journal article supplement (doi:10.1039/d4qo00428k), 2024-01-01
Supplement: d4qo00428k1.pdf [file d4qo00428k1.pdf]

## *Supporting Information*

### **Alkyl/Aryl Carboxylic Acids Meet Sulfur Fluoride (SO<sub>2</sub>F<sub>2</sub>): A Platform for Decarboxylative Dehydrogenation and Decarboxylative Cross-Coupling**

Chenfei Guan,<sup>a</sup> Huijie Qi,<sup>a</sup> Linjun Han,<sup>a</sup> Guofu Zhang,<sup>\*a</sup> Jinghui Lyu, Chengrong Ding<sup>\*a</sup>

<sup>a</sup> College of Chemical Engineering, Zhejiang University of Technology  
Hangzhou, P. R. China

# Table of Contents

|                                                                                                     |     |
|-----------------------------------------------------------------------------------------------------|-----|
| I. EXPERIMENTAL SECTION.....                                                                        | 3   |
| General Information.....                                                                            | 3   |
| Reaction Conditions and Screening.....                                                              | 4   |
| General procedure for the optimization of decarboxylative dehydrogenation.....                      | 4   |
| General procedure for the optimization of decarboxylative dehydrogenation.....                      | 7   |
| List of ligands used.....                                                                           | 13  |
| General procedure for decarboxylative dehydrogenation (standard conditions 1).....                  | 14  |
| General procedure for decarboxylative dehydrogenation at room temperature.....                      | 14  |
| General procedure for decarboxylative dehydrogenation on a gram scale.....                          | 15  |
| General procedure for solid sulfuryl fluoride reagent-mediated decarboxylative dehydrogenation..... | 15  |
| General procedure for decarboxylative cross-coupling (standard conditions 2).....                   | 16  |
| Unsuccessful substrates.....                                                                        | 17  |
| Sample (5e) Preparation for X-ray.....                                                              | 19  |
| Synthetic Applications.....                                                                         | 21  |
| Mechanism Experiments.....                                                                          | 24  |
| 1. Free radical inhibition experiment.....                                                          | 24  |
| 2. Reaction rate experiments.....                                                                   | 25  |
| 3. Hammett Competition Experiments.....                                                             | 26  |
| 4. Possible intermediates.....                                                                      | 27  |
| 5. Kinetic Isotope Effect Experiments.....                                                          | 29  |
| Computational Details.....                                                                          | 30  |
| II. EXPERIMENTAL CHARACTERIZATION DATA.....                                                         | 33  |
| Alkenylation Products of Alkyl Carboxylic Acids.....                                                | 33  |
| Biarylation Products of Aryl Carboxylic Acids.....                                                  | 49  |
| Other Products.....                                                                                 | 58  |
| III. REFERENCE.....                                                                                 | 62  |
| IV. SPECTROSCOPIC DATA.....                                                                         | 66  |
| V. CARTESIAN COORDINATES OF THE STRUCTURES.....                                                     | 230 |

# I. Experimental Section

## General Information

All source materials and reagents were purchased from commercial suppliers and are used without pretreatment unless otherwise indicated. All experiments involving palladium were performed using standard Schlenk techniques under nitrogen unless stated otherwise. All results were detected using thin-layer chromatography (TLC) on commercial silica gel plates. Visualization of the developed plates was performed under UV light (254 nm). Rapid column chromatography was performed on silica gel. Column chromatography was performed with silica gel (200-300 mesh) using various combinations of non-aqueous organic solvents as eluents.

NMR spectra were recorded in  $\text{CDCl}_3$  or  $\text{DMSO-d}_6$  on Bruker AVANCE III 400/600 MHz ( $^1\text{H}$ NMR), 101 MHz ( $^{13}\text{C}$ NMR) and 377 MHz ( $^{19}\text{F}$ NMR) instruments with TMS as the internal standard and the following abbreviations were used to identify the multiplicities: s = singlet, d = doublet, t = triplet, q = quartet, m = multiplet, dd = doublet of doublets, dt = doublet of triplets, dq = doublet of quartets, br = broad and all combinations thereof can be explained by their integral parts. Coupling constant (J) was reported in hertz unit (Hz). High-resolution mass spectrometry analysis was performed on the ThermoFisher ITQ1100. Single crystals was selected and on a Bruker D8 VENTURE TXS PHOTON II diffractometer. DFT calculations were performed with Gaussian 16 program.

## Reaction Conditions and Screening

### General procedure for the optimization of decarboxylative dehydrogenation.

A 25 mL Schlenk flask equipped with a stirring bar is filled with alkylcarboxylic acid (neat, 0.2 mmol, 1.0 equiv.), base (0.5~5.0 equiv.), Pd catalyst (typically, 5 mol%), ligand (typically, 6 mol%), solvent (0.2 M). Under positive pressure of SO<sub>2</sub>F<sub>2</sub> gas, five evacuation/backfill cycles are performed under high vacuum to fill the reaction tube and vigorous stirring at room temperature for 4 hours. Then increase to 100°C for 12 h. The mixture was allowed to react. After the reaction is completed, the reaction was quenched with water and the reaction mixture was extracted with dichloromethane for three times. The combined organic layer was washed with brine and dried over anhydrous Na<sub>2</sub>SO<sub>4</sub>. The solvent was removed under vacuum and the residue was purified by a flash column chromatography on silica gel using ethyl acetate and petroleum as eluent.

Table S1. Optimization of decarboxylative dehydrogenation conditions: screening of base<sup>a</sup>

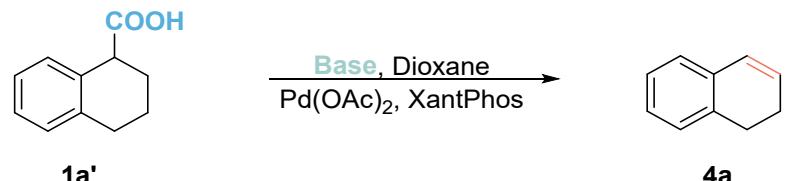

**1a'**  $\xrightarrow[\text{Pd(OAc)}_2, \text{XantPhos}]{\text{Base, Dioxane}}$  **4a**

| Entry | Base (x equiv.)                      | Yield 4a (%) |
|-------|--------------------------------------|--------------|
| 1     | TEA (4.0)                            | 75           |
| 2     | DBU (4.0)                            | n.r.         |
| 3     | DIPEA (4.0)                          | 69           |
| 4     | DMAP (4.0)                           | n.r.         |
| 5     | DBACO (4.0)                          | n.r.         |
| 6     | NaOAc (4.0)                          | 41           |
| 7     | KOAc (4.0)                           | 59           |
| 8     | K <sub>3</sub> PO <sub>4</sub> (4.0) | 28           |
| 9     | Li <sup>t</sup> OBu (4.0)            | n.r.         |
| 10    | TEA (5.0)                            | 82           |
| 11    | TEA (3.0)                            | 77           |
| 12    | TEA (2.0)                            | 90           |
| 13    | TEA (1.0)                            | 87           |
| 14    | TEA (0.5)                            | 81           |

<sup>a</sup> Reaction conditions: **1a'** (0.2 mmol), **Base (x mmol, x eq.)**, dioxane (0.2 M), Pd(OAc)<sub>2</sub> (10 mol%), XantPhos (12 mol%), 45 °C, 4 h, then 100 °C, 18.0 h; Under SO<sub>2</sub>F<sub>2</sub> gas atmosphere. n.r. = no reaction.



Table S2. Optimization of decarboxylative dehydrogenation conditions: screening of solvent<sup>a</sup>

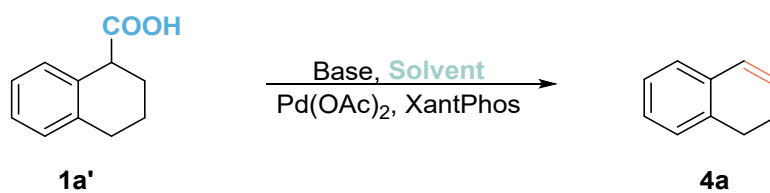

| Entry | Solvent            | Yield 4a (%) |
|-------|--------------------|--------------|
| 1     | Dioxane            | 90           |
| 2     | CH <sub>3</sub> CN | 88           |
| 3     | CH <sub>3</sub> OH | n.r.         |
| 4     | THF                | n.r.         |
| 5     | Toluene            | 90           |
| 6     | DMF                | 59           |
| 7     | DMSO               | n.r.         |
| 8     | NMP                | n.r.         |
| 9     | HFIP               | n.r.         |
| 10    | Octane             | 93           |
| 11    | DCE                | 95           |

<sup>a</sup> Reaction conditions: **1a'** (0.2 mmol), TEA (0.4 mmol, 2 eq.), **Solvent (0.2 M)**, Pd(OAc)<sub>2</sub> (10 mol%), XantPhos (12 mol%), 45 °C, 4 h, then 100 °C, 18.0 h; Under SO<sub>2</sub>F<sub>2</sub> gas atmosphere. n.r. = no reaction.

Table S3. Optimization of decarboxylative dehydrogenation conditions: screening of Pd catalysts and Ligands<sup>a</sup>

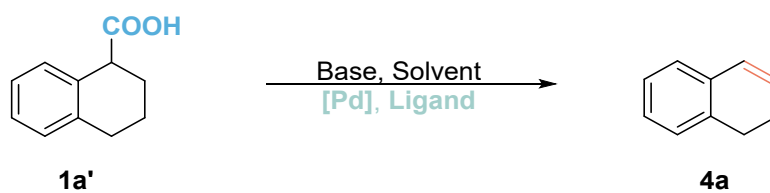

| Entry           | Pd catalysts (x mol%)                                   | Ligand (x mol%) | Yield 4a <sup>a</sup> (%) |
|-----------------|---------------------------------------------------------|-----------------|---------------------------|
| 1               | Pd(OAc) <sub>2</sub> (10)                               | L17 (12)        | 95                        |
| 2               | PdCl <sub>2</sub> (10)                                  | L17 (12)        | n.r.                      |
| 3               | Pd(acac) <sub>2</sub> (10)                              | L17 (12)        | n.r.                      |
| 4               | Pd(dba) <sub>2</sub> (10)                               | L17 (12)        | 87                        |
| 5               | PdTEF (10)                                              | L17 (12)        | 94                        |
| 6               | Pd(PPh <sub>3</sub> ) <sub>4</sub> Cl <sub>2</sub> (10) | L17 (12)        | 87                        |
| 7               | Pd(dppf) <sub>2</sub> Cl <sub>2</sub> (10)              | L17 (12)        | 81                        |
| 8               | Ni(DME)Cl <sub>2</sub>                                  | L17 (12)        | n.r.                      |
| 9               | Cu(OAc) <sub>2</sub>                                    | L17 (12)        | n.r.                      |
| 10              | Pd(OAc) <sub>2</sub> (10)                               | L2 (10)         | n.r.                      |
| 11              | Pd(OAc) <sub>2</sub> (10)                               | L6 (10)         | 61                        |
| 12              | Pd(OAc) <sub>2</sub> (10)                               | L7 (10)         | 52                        |
| 13              | Pd(OAc) <sub>2</sub> (10)                               | L11 (10)        | 73                        |
| 14              | Pd(OAc) <sub>2</sub> (10)                               | L13 (10)        | 90                        |
| 15              | Pd(OAc) <sub>2</sub> (10)                               | L19 (10)        | 65                        |
| 16              | Pd(OAc) <sub>2</sub> (10)                               | L22 (10)        | 57                        |
| 17              | Pd(OAc) <sub>2</sub> (5)                                | L17 (6)         | 96                        |
| 18              | Pd(OAc) <sub>2</sub> (2)                                | L17 (3)         | 81                        |
| 19 <sup>b</sup> | Pd(OAc) <sub>2</sub> (5)                                | L17 (6)         | 97                        |
| 20 <sup>c</sup> | Pd(OAc) <sub>2</sub> (5)                                | L17 (6)         | 93                        |

<sup>a</sup> Reaction conditions: **1a'** (0.2 mmol), TEA (0.4 mmol, 2 eq.), DCE (0.2 M), [Pd] (x mol%), Ligand (x mol%), 45 °C, 4 h, then 100 °C, 18.0 h; Under SO<sub>2</sub>F<sub>2</sub> gas atmosphere. n.r. = no reaction. <sup>b</sup> 12.0 h instead of 18.0 h. <sup>c</sup> Reacts at 100 °C for 12 h.

## General procedure for the optimization of decarboxylative dehydrogenation.

A 25 mL Schlenk flask equipped with a stirring bar is filled with Arylcarboxylic acid (neat, 0.2 mmol, 1.0 equiv.), base (1.0~7.0 equiv.), solvent (1~2 mL). Under positive pressure of SO<sub>2</sub>F<sub>2</sub> gas, five evacuation/backfill cycles are performed under high vacuum to fill the reaction tube and vigorous stirring at 45°C for few hours. After the reaction is completed, the reaction bottle is purged with nitrogen. Then a one-time addition Pd catalyst (typically, 6 mol%), ligand (typically, 8 mol%), arylboronic acid (1.0~3.0 equiv.), additives (0~2.0 equiv.), solvent (0~1 mL). Under a positive pressure of nitrogen and five evacuations/backfilling cycles under high vacuum. The mixture was allowed to react at T °C. The reaction was quenched with water and the reaction mixture was extracted with ethyl acetate for three times. The combined organic layer was washed with brine and dried over anhydrous Na<sub>2</sub>SO<sub>4</sub>. The solvent was removed under vacuum and the residue was purified by a flash column chromatography on silica gel using ethyl acetate and petroleum as eluent.

Table S4. Optimization of decarboxylative cross-coupling conditions: screening of base<sup>a</sup>

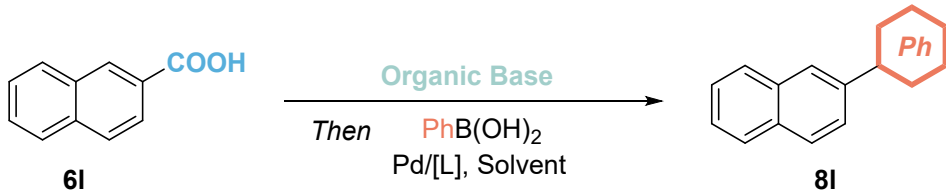

Reaction scheme: **6I** (naphthalene-1-carboxylic acid) reacts with an **Organic Base**, **PhB(OH)<sub>2</sub>**, **Pd/[L]**, and **Solvent** to yield **8I** (1-phenylnaphthalene).

| Entry | Base (x equiv.)          | Yield <b>8I</b> (%) |
|-------|--------------------------|---------------------|
| 1     | DIPEA (3.0)              | 47                  |
| 2     | DBU (3.0)                | 10                  |
| 3     | TEA (3.0)                | 50                  |
| 4     | DMAP (3.0)               | 30                  |
| 5     | pyridine (3.0)           | n.r.                |
| 6     | <sup>t</sup> BuONa (3.0) | n.r.                |
| 7     | KF (3.0)                 | n.r.                |
| 8     | CsF (3.0)                | n.r.                |
| 9     | TEA (1.0)                | 34                  |
| 10    | TEA (2.0)                | 37                  |
| 11    | TEA (4.0)                | 52                  |
| 12    | TEA (5.0)                | 47                  |
| 13    | TEA (7.0)                | 45                  |

<sup>a</sup> Reaction conditions: **6I** (0.2 mmol), **Base (x mmol, x eq.)**, dioxane (0.2 M), 45 °C, 4 h, under SO<sub>2</sub>F<sub>2</sub> gas atmosphere. Then add PhB(OH)<sub>2</sub> (0.4 mmol, 2.0 eq.), Pd(OAc)<sub>2</sub> (6 mol%), Ruphos (8 mol%), dioxane (0.2 M), 110 °C, 18.0 h; Under nitrogen atmosphere. n.r.=no reaction.

Table S5. Optimization of decarboxylative cross-coupling conditions: screening of time-1<sup>a</sup>

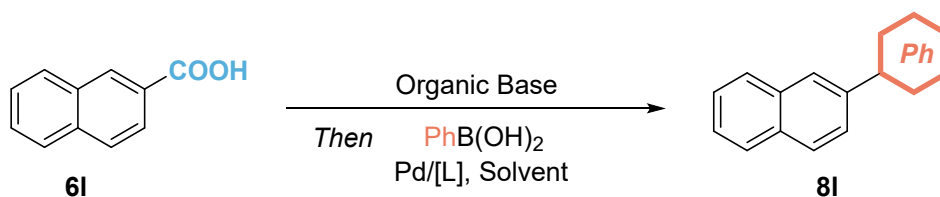

| Entry | Time-1 (h) | Yield 8I (%) |
|-------|------------|--------------|
| 1     | 1.0        | 39           |
| 2     | 2.0        | 41           |
| 3     | 4.0        | 52           |
| 4     | 8.0        | 51           |

<sup>a</sup> Reaction conditions: **6I** (0.2 mmol), TEA (0.8 mmol, 4.0 eq.), dioxane (0.2 M), 45 °C, x h, under SO<sub>2</sub>F<sub>2</sub> gas atmosphere. Then addition PhB(OH)<sub>2</sub> (0.4 mmol, 2.0 eq.), Pd(OAc)<sub>2</sub> (6 mol%), Ruphos (8 mol%), dioxane (0.2 M), 110 °C, 18.0 h; Under nitrogen atmosphere.

Table S6. Optimization of decarboxylative cross-coupling conditions: screening of temperature-2<sup>a</sup>

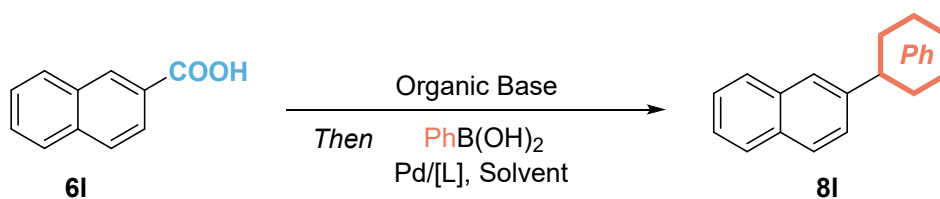

| Entry | Temperature-2 (°C) | Yield 8I (%) |
|-------|--------------------|--------------|
| 1     | r.t.               | trace        |
| 2     | 80                 | 49           |
| 3     | 90                 | 46           |
| 4     | 100                | 52           |
| 5     | 110                | 52           |
| 6     | 140                | 39           |

<sup>a</sup> Reaction conditions: **6I** (0.2 mmol), TEA (0.8 mmol, 4.0 eq.), dioxane (0.2 M), 45 °C, 4 h, under SO<sub>2</sub>F<sub>2</sub> gas atmosphere. Then addition PhB(OH)<sub>2</sub> (0.4 mmol, 2.0 eq.), Pd(OAc)<sub>2</sub> (6 mol%), Ruphos (8 mol%), dioxane (0.2 M), x °C, 18.0 h; Under nitrogen atmosphere.

Table S7. Optimization of decarboxylative cross-coupling conditions: screening of [B] equivale.<sup>a</sup>

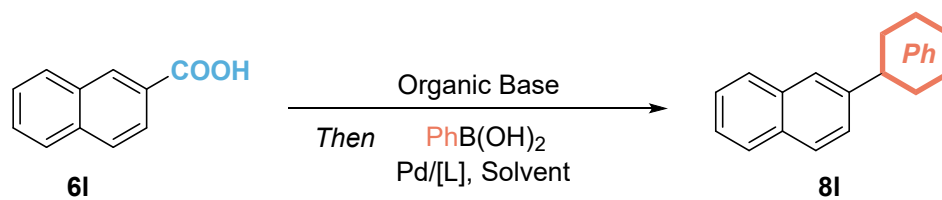

| Entry | [B] source (x equiv.)    | Yield 8I (%) |
|-------|--------------------------|--------------|
| 1     | $\text{PhB(OH)}_2$ (1.0) | 30           |
| 2     | $\text{PhB(OH)}_2$ (1.5) | 39           |
| 3     | $\text{PhB(OH)}_2$ (2.0) | 52           |
| 4     | $\text{PhB(OH)}_2$ (3.0) | 56           |

<sup>a</sup> Reaction conditions: **II** (0.2 mmol), TEA (0.8 mmol, 4.0 eq.), dioxane (0.2 M), 45 °C, 4 h, under  $\text{SO}_2\text{F}_2$  gas atmosphere. Then addition [B] (x mmol, x eq.),  $\text{Pd(OAc)}_2$  (6 mol%), Ruphos (8 mol%), dioxane (0.2 M), 100 °C, 18.0 h; Under nitrogen atmosphere.

Table S8. Optimization of decarboxylative cross-coupling conditions: screening of Pd/Ligand and additives.<sup>a</sup>

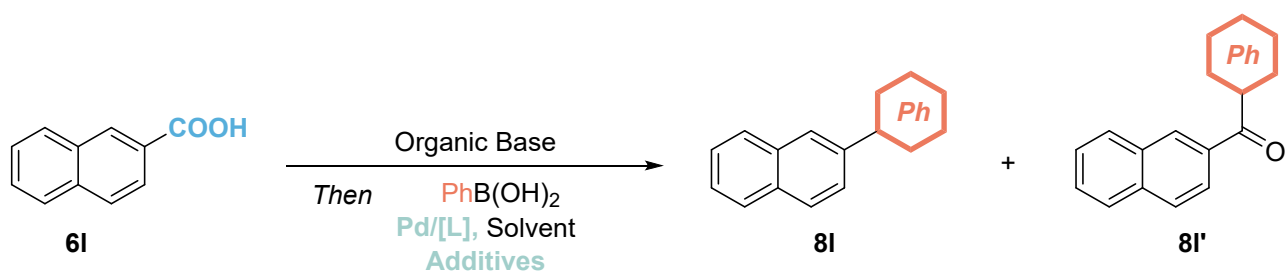

| Entry | Pd (x mol%)               | [L] (x mol%) | Additives (x mol%)        | Yield <b>81</b> (%) | Yield <b>81'</b> (%) |
|-------|---------------------------|--------------|---------------------------|---------------------|----------------------|
| 1     | Pd(OAc) <sub>2</sub> (6)  | L1 (8)       | -                         | 12                  | 14                   |
| 2     | Pd(OAc) <sub>2</sub> (6)  | L2 (8)       | -                         | 22                  | 22                   |
| 3     | Pd(OAc) <sub>2</sub> (6)  | L3 (8)       | -                         | 28                  | 22                   |
| 4     | Pd(OAc) <sub>2</sub> (6)  | L4 (8)       | -                         | n.r.                | n.r.                 |
| 5     | Pd(OAc) <sub>2</sub> (6)  | L5 (8)       | -                         | 7                   | n.r.                 |
| 6     | Pd(OAc) <sub>2</sub> (6)  | L6 (8)       | -                         | 56                  | 13                   |
| 7     | Pd(OAc) <sub>2</sub> (6)  | L7 (8)       | -                         | 13                  | 14                   |
| 8     | Pd(OAc) <sub>2</sub> (6)  | L8 (8)       | -                         | 15                  | n.r.                 |
| 9     | Pd(OAc) <sub>2</sub> (6)  | L9 (8)       | -                         | 39                  | 20                   |
| 10    | Pd(OAc) <sub>2</sub> (6)  | L10 (8)      | -                         | 29                  | 16                   |
| 11    | Pd(OAc) <sub>2</sub> (6)  | L11 (8)      | -                         | 40                  | 19                   |
| 12    | Pd(OAc) <sub>2</sub> (6)  | L12 (8)      | -                         | n.r.                | n.r.                 |
| 13    | Pd(OAc) <sub>2</sub> (6)  | L13 (8)      | -                         | 39                  | n.r.                 |
| 14    | Pd(OAc) <sub>2</sub> (6)  | L14 (8)      | -                         | n.r.                | n.r.                 |
| 15    | Pd(OAc) <sub>2</sub> (6)  | L15 (8)      | -                         | 33                  | n.r.                 |
| 16    | Pd(OAc) <sub>2</sub> (6)  | L16 (8)      | -                         | 43                  | 11                   |
| 17    | Pd(OAc) <sub>2</sub> (6)  | L17 (8)      | -                         | 73                  | 13                   |
| 18    | Pd(OAc) <sub>2</sub> (6)  | L18 (8)      | -                         | 48                  | 9                    |
| 19    | Pd(OAc) <sub>2</sub> (6)  | L19 (8)      | -                         | 30                  | n.r.                 |
| 20    | Pd(OAc) <sub>2</sub> (6)  | L20 (8)      | -                         | 25                  | n.r.                 |
| 21    | Pd(OAc) <sub>2</sub> (6)  | L21 (8)      | -                         | 34                  | n.r.                 |
| 22    | Pd(OAc) <sub>2</sub> (6)  | L22 (8)      | -                         | 47                  | n.r.                 |
| 23    | Pd(OAc) <sub>2</sub> (6)  | L23 (8)      | -                         | 43                  | 19                   |
| 24    | Pd(OAc) <sub>2</sub> (6)  | L24 (8)      | -                         | 21                  | 13                   |
| 25    | Pd(OAc) <sub>2</sub> (6)  | L25 (8)      | -                         | 23                  | 10                   |
| 26    | Pd(OAc) <sub>2</sub> (6)  | L26 (8)      | -                         | n.r.                | n.r.                 |
| 27    | PdCl <sub>2</sub> (6)     | L17 (8)      | -                         | 10                  | n.r.                 |
| 28    | Pd(acac) <sub>2</sub> (6) | L17 (8)      | -                         | 64                  | 11                   |
| 29    | Pd(dba) <sub>2</sub> (6)  | L17 (8)      | -                         | n.r.                | n.r.                 |
| 30    | Pd(TEF) <sub>2</sub> (6)  | L17 (8)      | -                         | 54                  | 17                   |
| 31    | Pd(OAc) <sub>2</sub> (3)  | L17 (6)      | -                         | 63                  | 9                    |
| 32    | Pd(OAc) <sub>2</sub> (10) | L17 (15)     | -                         | 68                  | 20                   |
| 33    | Pd(OAc) <sub>2</sub> (6)  | L17 (8)      | CuBr (10)                 | 72                  | 15                   |
| 34    | Pd(OAc) <sub>2</sub> (6)  | L17 (8)      | Cu(OTf) <sub>2</sub> (10) | 78                  | 2                    |

<sup>a</sup> Reaction conditions: **61** (0.2 mmol), TEA (0.8 mmol, 4.0 eq.), dioxane (0.2 M), 45 °C, 4 h, under SO<sub>2</sub>F<sub>2</sub> gas atmosphere. Then addition PhB(OH)<sub>2</sub> (0.6 mmol, 3.0 eq.), [Pd] (x mol%), [L] (x mol%), Additives (10 mol%), dioxane (0.2 M), 100 °C, 18.0 h; Under nitrogen atmosphere. n.r.=no reaction.

Table S9. Optimization of decarboxylative cross-coupling conditions: screening of solvent<sup>a</sup>

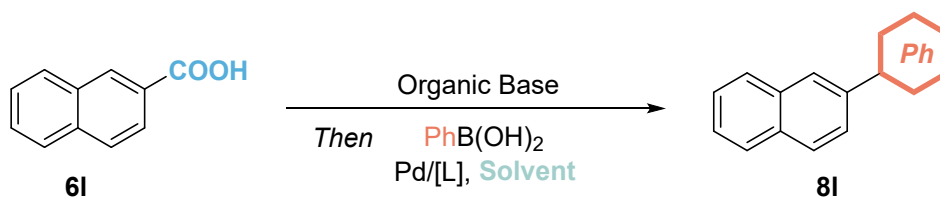

| Entry           | Solvent-1 (x M)           | Solvent-2 (x M)     | Yield <b>8I</b> (%) |
|-----------------|---------------------------|---------------------|---------------------|
| 1               | ACN (0.2)                 | ACN (0.2)           | NR                  |
| 2               | DMF (0.2)                 | dioxane (0.2)       | 10                  |
| 3               | DMSO (0.2)                | dioxane (0.2)       | NR                  |
| 4               | ACN (0.2)                 | dioxane (0.2)       | 25                  |
| 5               | ACN (0.2)                 | octane (0.2)        | 34                  |
| 6               | ACN (0.2)                 | fluorobenzene (0.2) | NR                  |
| 7               | dioxane (0.2)             | dioxane (0.2)       | 78                  |
| 8               | dioxane (0.2)             | -                   | 65                  |
| 9               | THF (0.2)                 | -                   | 50                  |
| 10              | octane (0.2)              | -                   | 54                  |
| 11              | heptane (0.2)             | -                   | 53                  |
| 12              | hexane (0.2)              | -                   | 44                  |
| 13              | MBTE (0.2)                | -                   | 38                  |
| 14              | toluene (0.2)             | -                   | NR                  |
| 15              | xylol (0.2)               | -                   | NR                  |
| 16 <sup>b</sup> | ACN (0.2)                 | -                   | 37                  |
| 17 <sup>b</sup> | octane (0.2)              | -                   | 66                  |
| 18 <sup>b</sup> | ACN:dioxane=0.5:0.5 (0.2) | -                   | 50                  |
| 19 <sup>b</sup> | dioxane:octane=8:2 (0.2)  | -                   | 72                  |
| 20 <sup>b</sup> | dioxane:octane=5:5 (0.2)  | -                   | 80                  |
| 21 <sup>b</sup> | dioxane:octane=3:7 (0.2)  | -                   | 87                  |
| 22 <sup>b</sup> | dioxane:octane=2:8 (0.2)  | -                   | 86                  |
| 23 <sup>b</sup> | dioxane:octane=1:9 (0.2)  | -                   | 85                  |

<sup>a</sup> Reaction conditions: **6I** (0.2 mmol), TEA (0.8 mmol, 4.0 eq.), **Solvent-1 (x M)**, 45 °C, 4 h, under  $\text{SO}_2\text{F}_2$  gas atmosphere. Then addition  $\text{PhB(OH)}_2$  (0.6 mmol, 3.0 eq.),  $\text{Pd(OAc)}_2$  (6 mol%), Ruphos (8 mol%), **Solvent-2 (x M)**, 100 °C, 18.0 h; Under nitrogen atmosphere. NR=no reaction.

<sup>b</sup> Reaction conditions: **6I** (0.2 mmol), TEA (0.8 mmol, 4.0 eq.), **Solvent-1 (x M)**, 45 °C, 4 h, under  $\text{SO}_2\text{F}_2$  gas atmosphere. Then addition  $\text{PhB(OH)}_2$  (0.6 mmol, 3.0 eq.),  $\text{Pd(OAc)}_2$  (6 mol%), XantPhos (8 mol%),  $\text{Cu(OTf)}_2$  (10 mol%), 100 °C, 18.0 h; Under nitrogen atmosphere.

Table S10. Optimization of decarboxylative cross-coupling conditions: screening of additive<sup>a</sup>

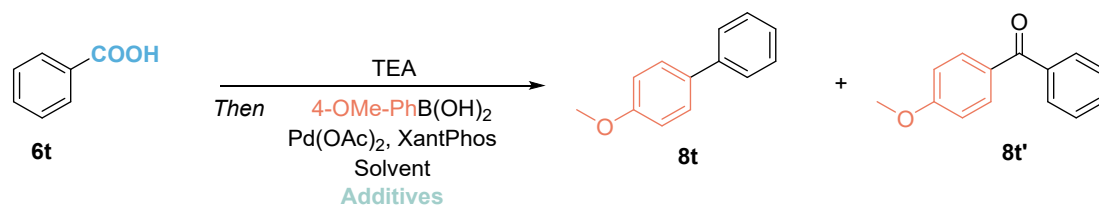

| Entry | Additives                       | Yield <b>8t</b> (%) | Yield <b>8t'</b> (%) |
|-------|---------------------------------|---------------------|----------------------|
| 1     | CuBr                            | 40                  | 22                   |
| 2     | CuI                             | 39                  | 23                   |
| 3     | CuBr <sub>2</sub>               | 40                  | 34                   |
| 4     | Cu(acac) <sub>2</sub>           | 36                  | 32                   |
| 5     | Cu(OAc) <sub>2</sub>            | 70                  | 5                    |
| 6     | Cu(OTf) <sub>2</sub>            | 77                  | 0                    |
| 7     | Ag <sub>2</sub> CO <sub>3</sub> | 11                  | 15                   |
| 8     | AgOAc                           | 15                  | 11                   |
| 9     | AgOTf                           | 21                  | 15                   |
| 10    | Co(OTf) <sub>2</sub>            | 44                  | 35                   |
| 11    | In(OTf) <sub>3</sub>            | 0                   | 0                    |
| 12    | Al(OTf) <sub>3</sub>            | 48                  | 30                   |
| 13    | Ba(OTf) <sub>2</sub>            | 43                  | 37                   |
| 14    | Ca(OTf) <sub>2</sub>            | 41                  | 38                   |
| 15    | Zn(OTf) <sub>2</sub>            | 46                  | 34                   |

<sup>a</sup> Reaction conditions: **6t** (0.2 mmol), TEA (0.8 mmol, 4.0 eq.), octane : dioxane = 7 : 3 (0.2 M), 45 °C, 4 h, under SO<sub>2</sub>F<sub>2</sub> gas atmosphere. Then addition PhB(OH)<sub>2</sub> (0.6 mmol, 3.0 eq.), Pd(OAc)<sub>2</sub> (6 mol%), XantPhos (8 mol%), additive (10 mol%), 100 °C, 18.0 h; Under nitrogen atmosphere.



## List of ligands used.

### Monodentate phosphine

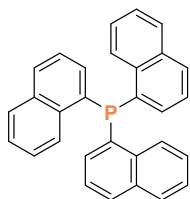

L1

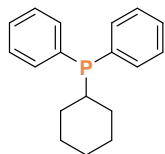

L2

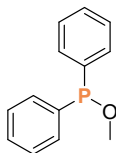

L3

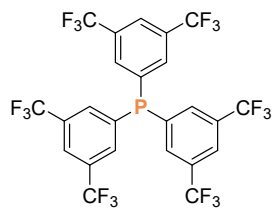

L4

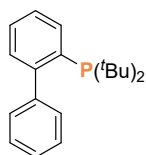

L5

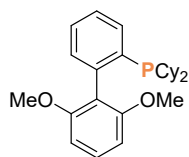

L6

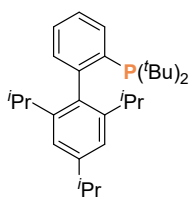

L7

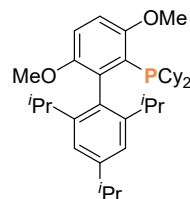

L8

### Bidentate phosphine

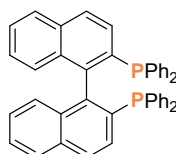

L9

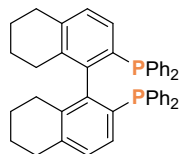

L10

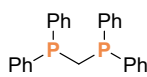

L11

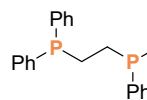

L12

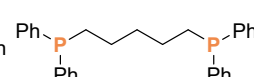

L13

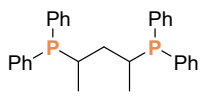

L14

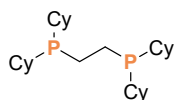

L15

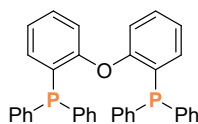

L16

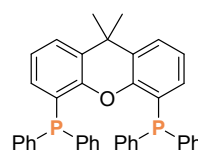

L17

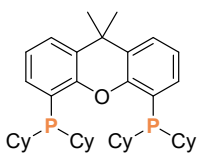

L18

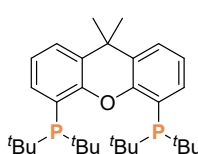

L19

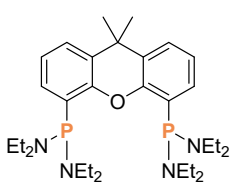

L20

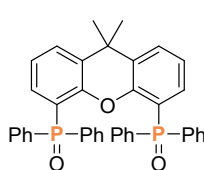

L21

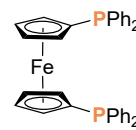

L22

### Nitrogen containing ligand

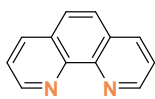

L23

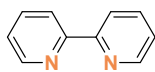

L24

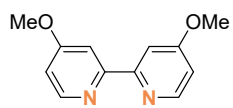

L25

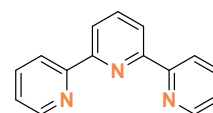

L26

### General procedure for decarboxylative dehydrogenation (standard conditions 1).

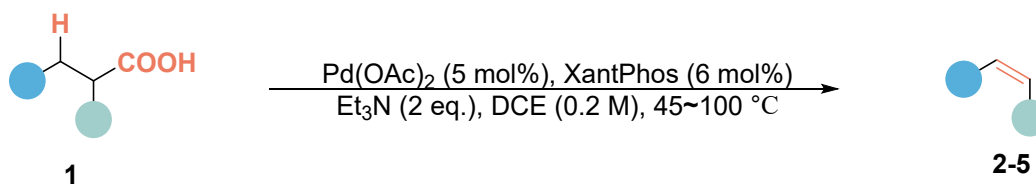

A 25 mL Schlenk flask equipped with a stirring bar is filled with alkylcarboxylic acid **1** (neat, 0.2 mmol, 1.0 equiv.), Et<sub>3</sub>N (0.4 mmol, 2.0 equiv.), Pd(OAc)<sub>2</sub> (5 mol%), XantPhos (6 mol%), dichloroethane (1 mL, 0.2 M). Under positive pressure of SO<sub>2</sub>F<sub>2</sub> gas, five evacuation/backfill cycles are performed under high vacuum to fill the reaction tube and vigorous stirring at 45 °C for 4~8 hours. After the reaction is completed, the reaction bottle is purged with nitrogen. Then heat up to 100 °C. The mixture was allowed to react for 12 h. The reaction was quenched with water and the reaction mixture was extracted with dichloromethane for three times. The combined organic layer was washed with brine and dried over anhydrous Na<sub>2</sub>SO<sub>4</sub>. The solvent was removed under vacuum and the residue was purified by a flash column chromatography on silica gel using ethyl acetate and petroleum as eluent.

### General procedure for decarboxylative dehydrogenation at room temperature.

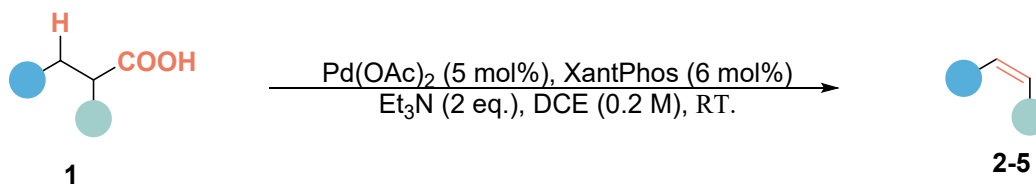

A 25 mL Schlenk flask equipped with a stirring bar is filled with alkylcarboxylic acid **1** (neat, 0.2 mmol, 1.0 equiv.), Et<sub>3</sub>N (0.4 mmol, 2.0 equiv.), Pd(OAc)<sub>2</sub> (5 mol%), XantPhos (6 mol%), dichloroethane (1 mL, 0.2 M). Under positive pressure of SO<sub>2</sub>F<sub>2</sub> gas, five evacuation/backfill cycles are performed under high vacuum to fill the reaction tube and vigorous stirring at 45 °C for 8 hours. After the reaction is completed, the reaction bottle is purged with nitrogen. Then heat up to 25 °C. The mixture was allowed to react for 24 h. The reaction was quenched with water and the reaction mixture was extracted with dichloromethane for three times. The combined organic layer was washed with brine and dried over anhydrous Na<sub>2</sub>SO<sub>4</sub>. The solvent was removed under vacuum and the residue was purified by a flash column chromatography on silica gel using ethyl acetate and petroleum as eluent.

## General procedure for decarboxylative dehydrogenation on a gram scale.

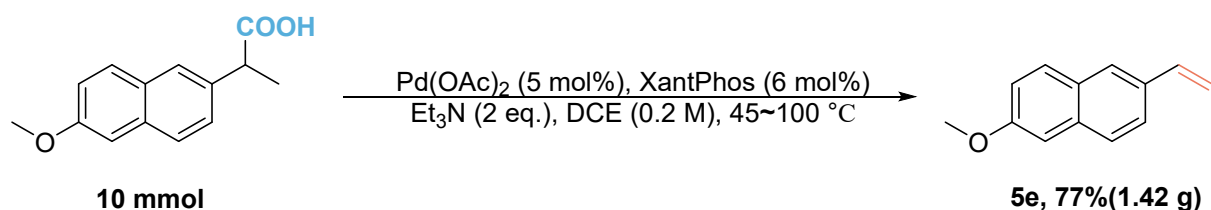

A 25 mL Schlenk flask equipped with a stirring bar is filled with naproxen (neat, 10 mmol, 2.3 g), Et<sub>3</sub>N (20 mmol, 2.0 equiv.), Pd(OAc)<sub>2</sub> (5 mol%), XantPhos (6 mol%), dichloroethane (30 mL). Under positive pressure of SO<sub>2</sub>F<sub>2</sub> gas, five evacuation/backfill cycles are performed under high vacuum to fill the reaction tube and vigorous stirring at 45 °C for 12 hours under positive pressure of SO<sub>2</sub>F<sub>2</sub> balloon. After the reaction is completed, the reaction bottle is purged with nitrogen. Then heat up to 100 °C. The mixture was allowed to react for 12 h. The reaction was quenched with water and the reaction mixture was extracted with dichloromethane for three times. The combined organic layer was washed with brine and dried over anhydrous Na<sub>2</sub>SO<sub>4</sub>. The solvent was removed under vacuum and the residue was purified by a flash column chromatography on silica gel using ethyl acetate and petroleum as eluent.

## General procedure for solid sulfuryl fluoride reagent-mediated decarboxylative dehydrogenation.

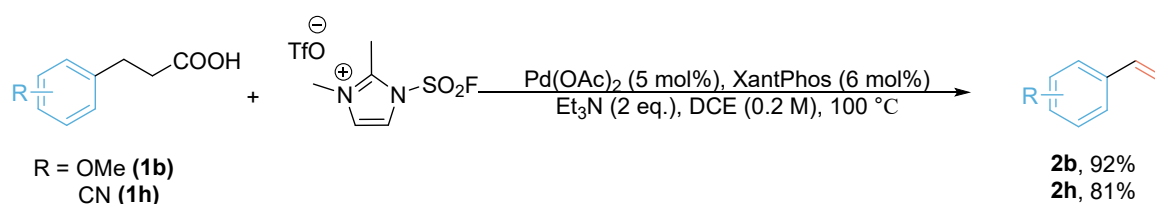

A 25 mL Schlenk flask equipped with a stirring bar is filled with alkylcarboxylic acid **1** (neat, 0.2 mmol, 1.0 equiv.), fluorosulfonyl imidazolium salt (0.4 mmol, 2.0 equiv.), Et<sub>3</sub>N (0.4 mmol, 2.0 equiv.), Pd(OAc)<sub>2</sub> (5 mol%), XantPhos (6 mol%), dichloroethane (1 mL, 0.2 M). The heat up to 100 °C. The mixture was allowed to react for 16 h. The reaction was quenched with water and the reaction mixture was extracted with dichloromethane for three times. The combined organic layer was washed with brine and dried over anhydrous Na<sub>2</sub>SO<sub>4</sub>. The solvent was removed under vacuum and the residue was purified by a flash column chromatography on silica gel using ethyl acetate and petroleum as eluent.

## General procedure for decarboxylative cross-coupling (standard conditions 2).

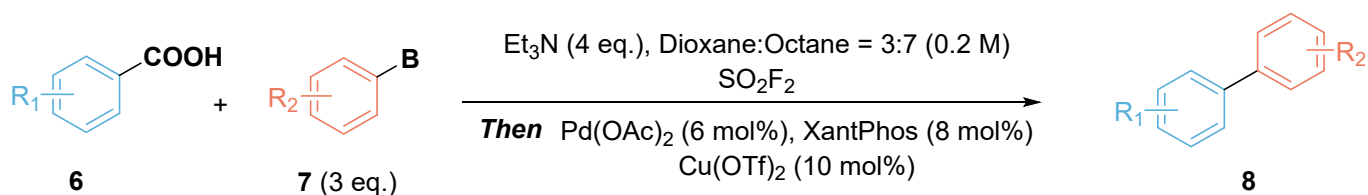

A 25 mL Schlenk flask equipped with a stirring bar is filled with Arylcarboxylic acid **6** (neat, 0.2 mmol, 1.0 equiv.),  $\text{Et}_3\text{N}$  (0.8 mmol, 4.0 equiv.), dioxane:octane=3:7 (1 mL, 0.2 M). Under positive pressure of  $\text{SO}_2\text{F}_2$  gas, five evacuation/backfill cycles are performed under high vacuum to fill the reaction tube and vigorous stirring at room temperature for 4 hours. After the reaction is completed, the reaction bottle is purged with nitrogen. Then a one-time addition  $\text{Pd}(\text{OAc})_2$  catalyst (6 mol%), XantPhos (8 mol%), Arylboronic acid **7** (0.6 mmol, 3.0 equiv.),  $\text{Cu}(\text{OTf})_2$  (10 mol%). Under a positive pressure of nitrogen and five evacuations/backfilling cycles under high vacuum. The mixture was allowed to react for 18 h. The reaction was quenched with water and the reaction mixture was extracted with ethyl acetate for three times. The combined organic layer was washed with brine and dried over anhydrous  $\text{Na}_2\text{SO}_4$ . The solvent was removed under vacuum and the residue was purified by a flash column chromatography on silica gel using ethyl acetate and petroleum as eluent.

## Unsuccessful substrates

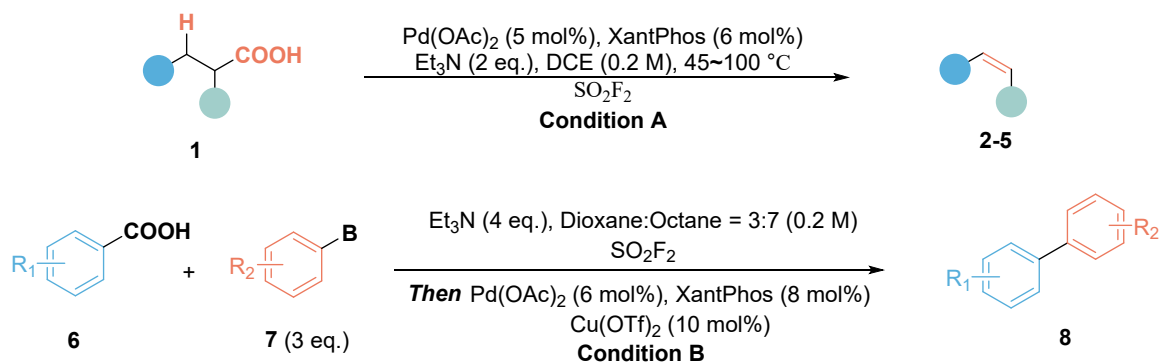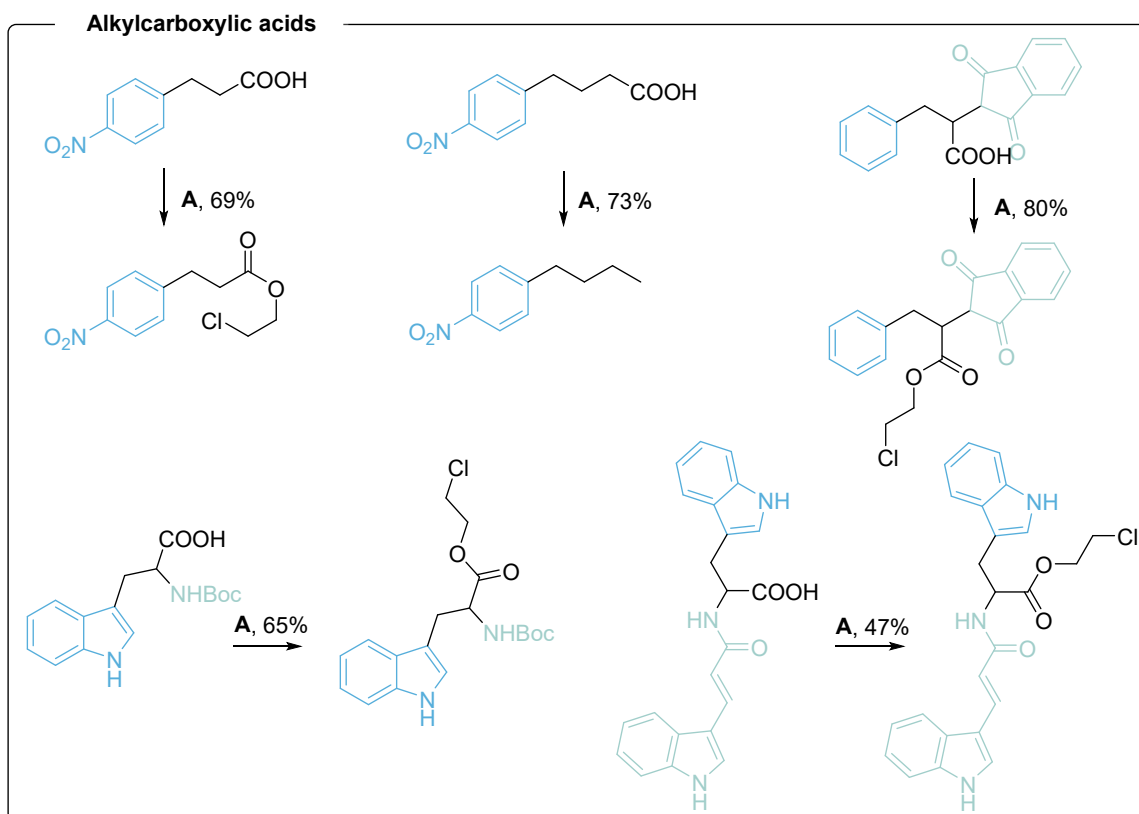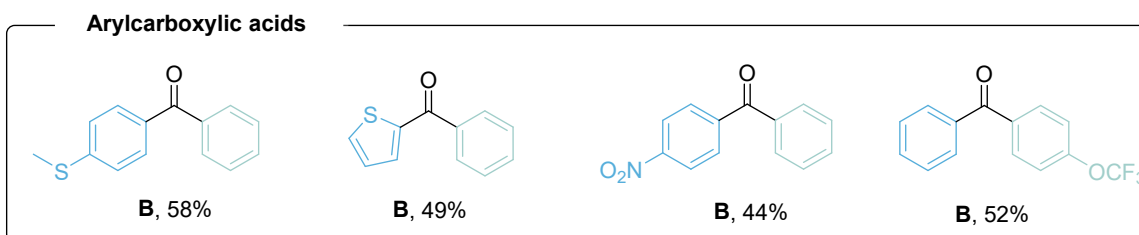

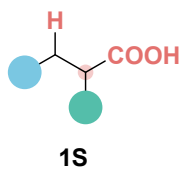

Condition A

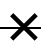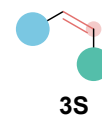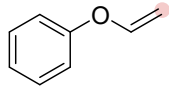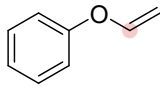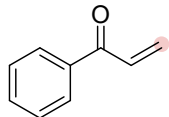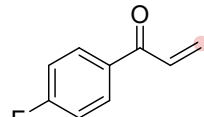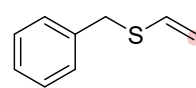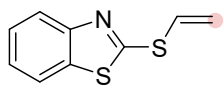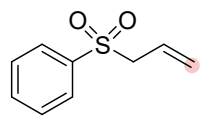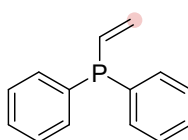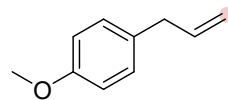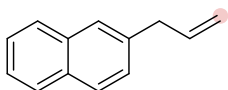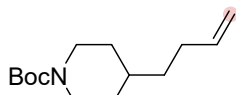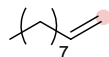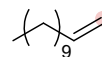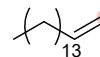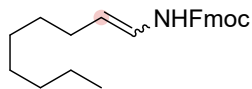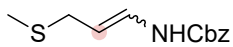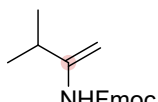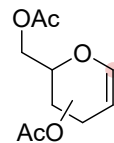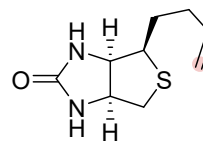

## Sample (5e) Preparation for X-ray

For compound 5e: compound 5e (10 mg) was dissolved in ethyl acetate (0.5 mL) in a 10 mL vial at room temperature. Hexane (3.0 mL) was dropped carefully to the mixture. Then, the vial was capped with thin film. Finally, a lamellar crystal was obtained for 4 days.

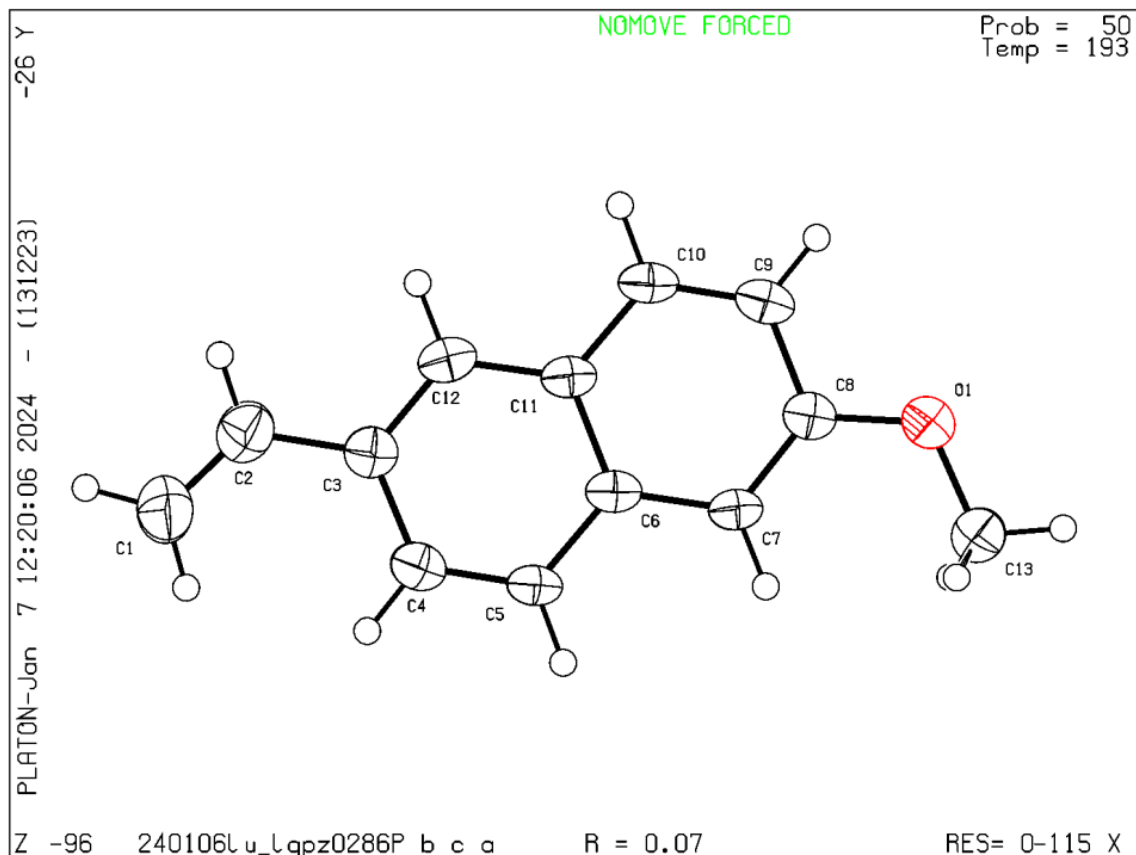

### Crystal data and structure refinement for compound 5e.

|                                    |                                   |
|------------------------------------|-----------------------------------|
| Identification code                | 5e                                |
| CCDC number                        | 2327303                           |
| Empirical formula                  | C <sub>13</sub> H <sub>12</sub> O |
| Formula weight                     | 184.23                            |
| Temperature/K                      | 193.00                            |
| Crystal system                     | monoclinic                        |
| Space group                        | Pbca                              |
| a/Å                                | 5.9974(4)                         |
| b/Å                                | 8.0073(6)                         |
| c/Å                                | 41.526(3)                         |
| α/°                                | 90                                |
| β/°                                | 90                                |
| γ/°                                | 90                                |
| Volume/Å <sup>3</sup>              | 1994.2(2)                         |
| Z                                  | 8                                 |
| ρ <sub>calc</sub> /cm <sup>3</sup> | 1.227                             |
| μ/mm <sup>-1</sup>                 | 0.076                             |
| F(000)                             | 784.0                             |

|                                                |                                                                      |
|------------------------------------------------|----------------------------------------------------------------------|
| Crystal size/mm <sup>3</sup>                   | 0.12 × 0.1 × 0.09                                                    |
| Radiation                                      | MoK $\alpha$ ( $\lambda = 0.71073$ )                                 |
| 2 $\theta$ range for data collection/ $^\circ$ | 5.886 to 55.25                                                       |
| Index ranges                                   | -7 $\leq$ h $\leq$ 7, -10 $\leq$ k $\leq$ 10, -44 $\leq$ l $\leq$ 54 |
| Reflections collected                          | 16218                                                                |
| Independent reflections                        | 2311 [Rint = 0.0793, Rsigma = 0.0461]                                |
| Data/restraints/parameters                     | 2311/0/129                                                           |
| Goodness-of-fit on F <sup>2</sup>              | 1.051                                                                |
| Final R indexes [ $I \geq 2\sigma(I)$ ]        | R <sub>1</sub> = 0.0697, wR <sub>2</sub> = 0.1678                    |
| Final R indexes [all data]                     | R <sub>1</sub> = 0.1070, wR <sub>2</sub> = 0.1913                    |
| Largest diff. peak/hole / e $\text{\AA}^{-3}$  | 0.31/-0.20                                                           |



## Synthetic Applications

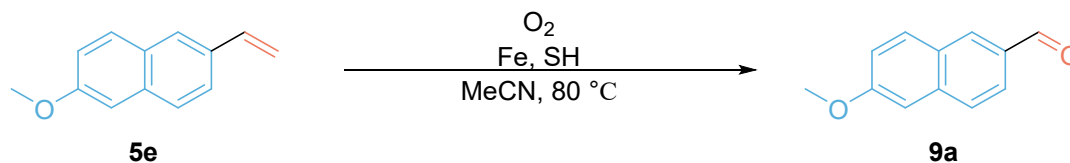

**Experimental procedure for the synthesis of 9a from 5e:** A 25 mL Schlenk flask equipped with a stirring bar is filled with 1,1'-bis(diphenylphosphino)ferrocene (dppf) (16.6 mg, 0.03 mmol, 0.1 equiv) and bismuththiol (4.5 mg, 0.03 mmol, 0.1 equiv). Under a positive pressure of nitrogen and five evacuations/backfilling cycles under high vacuum. Then **5e** (0.30 mmol, 1 equiv) and anhydrous  $MeCN$  (0.5 mL) were added. The reaction mixture was heated to  $80\text{ }^\circ C$  and allowed to react for 15 h. The reaction was quenched with water and the reaction mixture was extracted with ethyl acetate for three times. The combined organic layer was washed with brine and dried over anhydrous  $Na_2SO_4$ . The solvent was removed under vacuum and the residue was purified by a flash column chromatography on silica gel using ethyl acetate and petroleum as eluent.<sup>1</sup>

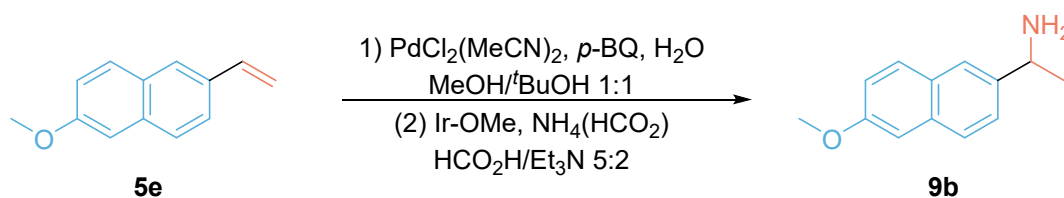

**Experimental procedure for the synthesis of 9b from 5e:** A 25 mL Schlenk flask equipped with a stirring bar is filled with  $MeOH$  (3.6 mL),  $tBuOH$  (3.6 mL),  $PdCl_2(MeCN)_2$  (1.6 mg, 0.006 mmol),  $p$ -benzoquinone (0.0973 g, 0.9 mmol),  $H_2O$  (27  $\mu L$ ) and the **5e** (0.60 mmol). Under a positive pressure of nitrogen and five evacuations/backfilling cycles under high vacuum. The reaction mixture was heated to  $70\text{ }^\circ C$  and allowed to react for 3 h. Then  $HCOONH_4$  (380 mg, 6 mmol),  $Ir\text{-OMe}$  (3.7 mg, 0.006 mmol), and formic acid/triethylamine (5:2) complex (0.6 mL) were added. The mixture was stirred at  $70\text{ }^\circ C$  for another 8 h. The mixture was evaporated and  $NaHCO_3$  was added. The reaction mixture was extracted with dichloromethane for three times. The combined organic layer was washed with brine and dried over anhydrous  $Na_2SO_4$ . The solvent was removed under vacuum and the residue was purified by a flash column chromatography on silica gel using ethyl acetate and petroleum as eluent.<sup>2</sup>

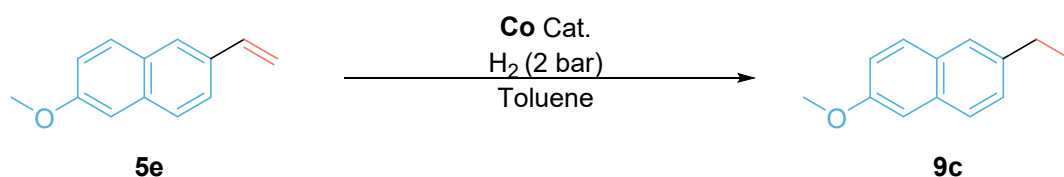

**Experimental procedure for the synthesis of 9c from 5e:** A dry 5 mL vial with a screw cap and PTFE septum was charged with a magnetic stirrer bar and a solution of the potassium bis(anthracene)cobaltate (0.05 mmol) in  $Toluene$  (1 mL). After adding a solution of the **5e** (0.5 mmol) in  $Toluene$  (1 mL) with a pipette, the vial was closed and the septum was punctured with a short needle. The vial was placed into a high-pressure reactor, which was sealed. After 6 h at room temperature under an atmosphere of hydrogen (2 bar), the pressure was released, the vial was removed, and the reaction was quenched with a saturated aqueous solution of  $NaHCO_3$  (1 mL). The residue was purified by a flash column chromatography on silica gel using ethyl acetate and petroleum as eluent.<sup>3</sup>

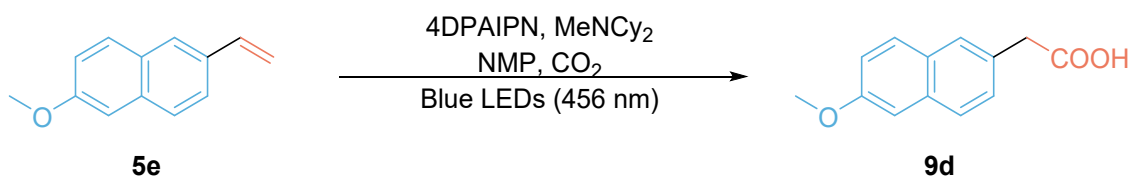

**Experimental procedure for the synthesis of 9d from 5e:** A 25 mL Schlenk flask equipped with a stirring bar is filled with 5e (0.2 mmol, 1.0 equiv.) and 4DPAIPN (2.4 mg, 0.003 mmol). Under a positive pressure of CO<sub>2</sub> and five evacuations/backfilling cycles under high vacuum. Then anhydrous NMP (2.0 mL) and *N, N*-dicyclohexylmethylamine (0.3 mmol, 58.5 mg, 64 μL) were added. After that, under a positive pressure of CO<sub>2</sub> and five evacuations/backfilling cycles under high vacuum. The mixture was irradiated with a 40 W 456 nm Kessil LED (3 cm away, with a cooling fan to keep the reaction temperature at room temperature). After 24 hours, the reaction was quenched with HCl (2N) and extracted by ethyl acetate for 5 times. The combined organic layers were washed with brine and concentrated in vacuo. The residue was purified by a flash column chromatography on silica gel using ethyl acetate and petroleum as eluent.<sup>4</sup>

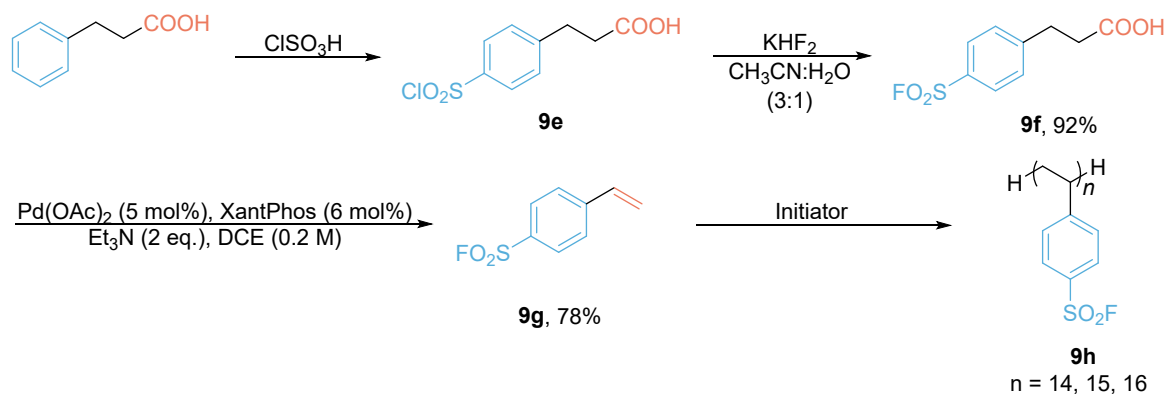

**Experimental procedure for the synthesis of 9e:** phenylpropanoic acid (22.5 g, 150 mmol, 1.0 eq.) was taken in a round bottle flask, and cooled to 10-15 °C. Chlorosulfonic acid (100 mL) was added to the reaction mass slowly in a dropwise manner at below 15 °C. The reaction mixture was stirred at 10-15 °C for 1 h slowly allowed to warm to room temperature and stirred for 2-3 h. The reaction mixture was added to cold water (300 mL) slowly in a dropwise manner at below 20 °C. The resulting mixture was allowed to room temperature, stirred for 2-3 h, filtered, washed with water (100 mL), and dried for 1 h. The wet product was dissolved in CH<sub>2</sub>Cl<sub>2</sub> (500 mL) and washed with water (100 mL) followed by brine (100 mL). The organic layer was dried over Na<sub>2</sub>SO<sub>4</sub> and concentrated to up to 100 mL. *n*-Hexane (200 mL) was added to the reaction mass at room temperature, and the resulting mixture was stirred for 1 h, filtered, and washed with *n*-hexane (100 mL). The wet product was taken into a round bottom flask, and dried at 40-45 °C under vacuum to give 12.3 g of 2-(4(chlorosulfonyl)phenyl)propanoic acid 9e (yellow solid, 49.5 mmol, 33% yield).<sup>5</sup>

**Experimental procedure for the synthesis of 9f:** KHF<sub>2</sub> (42.5 mmol, 2.5 equiv.) was dissolved in H<sub>2</sub>O (7 mL) to make a saturated solution, which was treated with a solution of 9e (17 mmol, 1 equiv.) in acetonitrile (20 mL). The reaction mixture was stirred at room temperature for 4-10 hours and was measured by HPLC. The aqueous phase was extracted with EtOAc (3 × 10 mL) and the combined organic extracts were washed with 10% NaCl aqueous solution (2x), saturated sodium chloride (1x), dried with sodium sulfate, filtered, and concentrated by rotary evaporation to obtain the crude product, which was purified by column chromatography on silica gel to obtain the pure product 9f (black solid, 3.6 g, 15.6 mmol, 92% yield).<sup>6</sup>

**Experimental procedure for the synthesis of 9h:** 0.6 g 4-vinylphenol sulfurofluoridate and 10 mg AIBN were added to a 25 mL round-bottomed flask containing 5 mL of DMSO. Then the flask was sealed and cycled between vacuum and argon three times before the reaction was allowed to stir at 85 °C



# Mechanism Experiments

## 1. Free radical inhibition experiment.

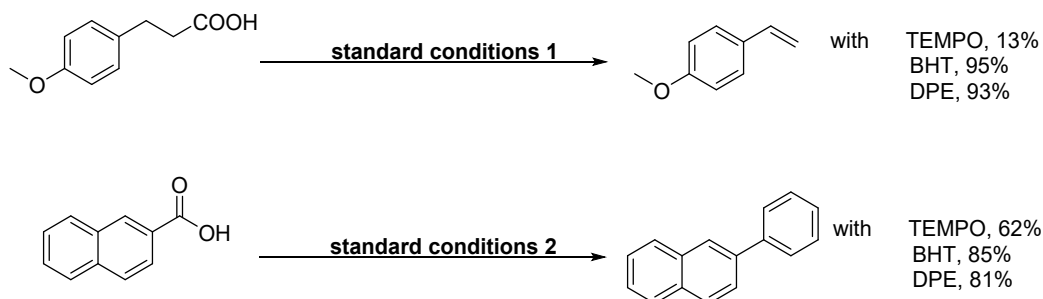

Free radical inhibitors 2,2,6,6-Tetramethylpiperidoxyl (TEMPO, 2.0 equiv.) or Butylated hydroxytoluene (BHT, 2.0 equiv.) or 1,1-Diphenylethene (DPE) (2.0 equiv.) were added to the reaction programme under standard conditions, respectively, and the yields were observed by <sup>1</sup>H NMR after completion of the reaction (1,3,5-trimethoxybenzene was used as an internal standard).

## 2. Reaction rate experiments.

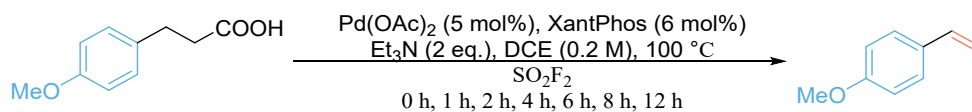

A 25 mL Schlenk flask equipped with a stirring bar is filled with 4-Methoxyphenylpropionic acid (neat, 0.2 mmol, 1.0 equiv.), Et<sub>3</sub>N (0.4 mmol, 2.0 equiv.), Pd(OAc)<sub>2</sub> (5 mol%), XantPhos (6 mol%), dichloroethane (1 mL, 0.2 M). Under positive pressure of SO<sub>2</sub>F<sub>2</sub> gas, five evacuation/backfill cycles are performed under high vacuum to fill the reaction tube and vigorous stirring at 45 °C for 8 hours. After the reaction is completed, the reaction bottle is purged with nitrogen. Then heat up to 100 °C. The mixture was allowed to react for 0 h, 1 h, 2 h, 4 h, 6 h, 8 h or 12 h. After completion of the reaction 0.5 mL of reaction solution was taken and mixed with the internal standard (1,3,5-Trimethoxybenzene) and the yield was detected by <sup>1</sup>H NMR. NMR analysis was used to determine the 4-nitrostyrene concentration and yields at the various timepoints.

### 3. Hammett Competition Experiments.

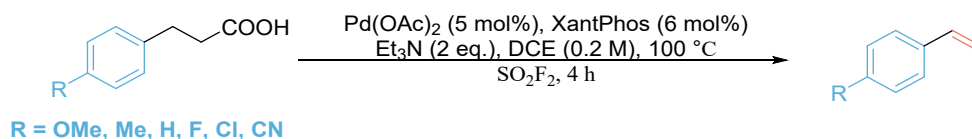

**Procedure for Hammett Competition Experiments.** A 25 mL Schlenk flask equipped with a stirring bar is filled with alkylcarboxylic acid (neat, 0.2 mmol, 1.0 equiv.), Et<sub>3</sub>N (0.4 mmol, 2.0 equiv.), dichloroethane (1 mL, 0.2 M). Under positive pressure of SO<sub>2</sub>F<sub>2</sub> gas, five evacuation/backfill cycles are performed under high vacuum to fill the reaction tube and vigorous stirring at 45 °C for 8 hours. The reaction bottle is purged with nitrogen. After Pd(OAc)<sub>2</sub> (5 mol%), XantPhos (6 mol%) were added. Then heat up to 100 °C. The mixture was allowed to react for 4 h. After completion of the reaction 0.5 mL of reaction solution was taken and mixed with the internal standard (1,3,5-Trimethoxybenzene) and the yield was detected by <sup>1</sup>H NMR. A crude NMR spectrum of the residue was obtained in 0.6 mL CDCl<sub>3</sub>.

**Data Analysis.** <sup>1</sup>H NMR yield of each product was obtained by integration of the aromatic peak of the 1,3,5-trimethoxybenzene internal standard (6.08 ppm) and the product resonances. After the yields of each product were obtained by NMR spectroscopy, the ratios of substituted product (P<sub>R</sub>, R = Ome, Me, F, Cl, CN) to unsubstituted product (P<sub>H</sub>, R = H) were determined (P<sub>R</sub>/P<sub>H</sub>) and the logarithm of these value was calculated for use in the Hammett plot (log(P<sub>R</sub>/P<sub>H</sub>)). The data was fit using the substituent constants, σ<sub>p</sub>.

Table S11. Data for Hammett competition experiments

| Entry | Substitution | Average (P <sub>R</sub> /P <sub>H</sub> ) | Average log(P <sub>R</sub> /P <sub>H</sub> ) | σ <sub>p</sub> |
|-------|--------------|-------------------------------------------|----------------------------------------------|----------------|
| 1     | OMe          | 1.18                                      | 0.072                                        | -0.27          |
| 2     | Me           | 1.05                                      | 0.021                                        | -0.17          |
| 3     | H            | 1.00                                      | 0                                            | 0              |
| 4     | F            | 0.95                                      | -0.022                                       | 0.06           |
| 5     | Cl           | 0.75                                      | -0.125                                       | 0.23           |
| 6     | CN           | 0.35                                      | -0.456                                       | 0.66           |

Entries 1-6 are comprised of an average of 3 trials each.

#### 4. Possible intermediates.

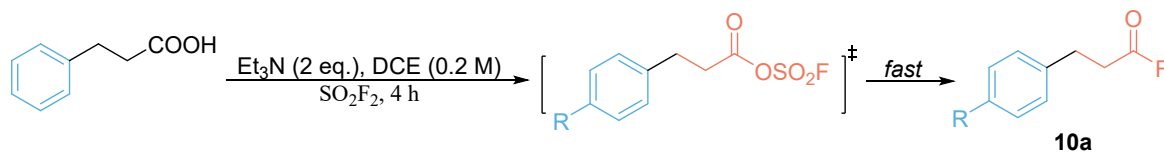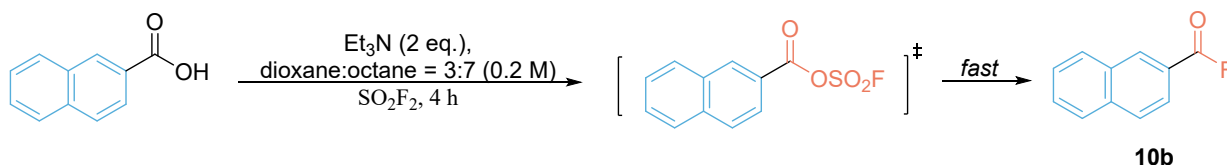

**Preparation of alkylcarboxylic acid activation intermediate 10a.** A 25 mL Schlenk flask equipped with a stirring bar is filled with alkylcarboxylic acid **1m** (neat, 0.2 mmol, 1.0 equiv.), Et<sub>3</sub>N (0.4 mmol, 2.0 equiv.), dichloroethane (1 mL, 0.2 M). Under positive pressure of SO<sub>2</sub>F<sub>2</sub> gas, five evacuation/backfill cycles are performed under high vacuum to fill the reaction tube and vigorous stirring at 45 °C for 4 hours. The reaction was quenched with water and the reaction mixture was extracted with dichloromethane for three times. The combined organic layer was washed with brine and dried over anhydrous Na<sub>2</sub>SO<sub>4</sub>. The solvent was removed under vacuum and the residue was purified by a flash column chromatography on silica gel using ethyl acetate and petroleum as eluent.

**Preparation of arylcarboxylic acid activation intermediate 10b.** A 25 mL Schlenk flask equipped with a stirring bar is filled with Arylcarboxylic acid **6l** (neat, 0.2 mmol, 1.0 equiv.), Et<sub>3</sub>N (0.8 mmol, 4.0 equiv.), dioxane:octane=3:7 (1 mL, 0.2 M). Under positive pressure of SO<sub>2</sub>F<sub>2</sub> gas, five evacuation/backfill cycles are performed under high vacuum to fill the reaction tube and vigorous stirring at room temperature for 4 hours. The reaction was quenched with water and the reaction mixture was extracted with ethyl acetate for three times. The combined organic layer was washed with brine and dried over anhydrous Na<sub>2</sub>SO<sub>4</sub>. The solvent was removed under vacuum and the residue was purified by a flash column chromatography on silica gel using ethyl acetate and petroleum as eluent.

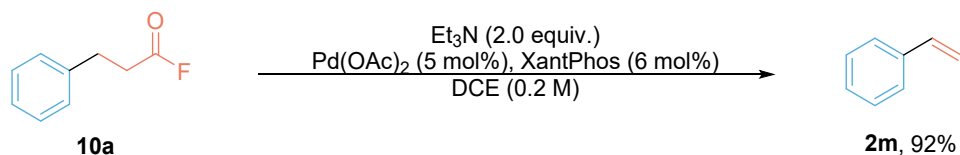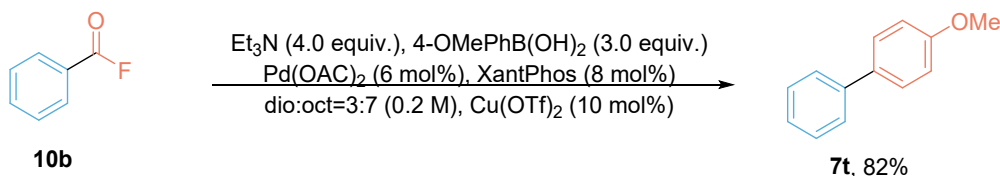

**Experimental procedure for the preparation of 2m from intermediate 10a.** A 25 mL Schlenk flask equipped with a stirring bar is filled with **10a** (0.2 mmol, 1.0 equiv.), Et<sub>3</sub>N (0.4 mmol, 2.0 equiv.), Pd(OAc)<sub>2</sub> (5 mol%), XantPhos (6 mol%), dichloroethane (1 mL, 0.2 M). Then heat up to 100 °C. The mixture was allowed to react for 12 h. The reaction was quenched with water and the reaction mixture was extracted with dichloromethane for three times. The combined organic layer was washed with brine and dried over anhydrous Na<sub>2</sub>SO<sub>4</sub>. The solvent was removed under vacuum and the residue was purified by a flash column chromatography on silica gel using ethyl acetate and petroleum as eluent.

**Experimental procedure for the preparation of 7t from intermediate 10b.** A 25 mL Schlenk flask equipped with a stirring bar is filled with **10b** (0.2 mmol, 1.0 equiv.), Et<sub>3</sub>N (0.8 mmol, 4.0 equiv.),

Pd(OAc)<sub>2</sub> catalyst (6 mol%), XantPhos (8 mol%), 4-methoxyphenylboronic acid (0.6 mmol, 3.0 equiv.), Cu(OTf)<sub>2</sub> (10 mol%), and dioxane:octane=3:7 (1 mL, 0.2 M). Under a positive pressure of nitrogen and five evacuations/backfilling cycles under high vacuum. The mixture was allowed to react for 18 h. The reaction was quenched with water and the reaction mixture was extracted with ethyl acetate for three times. The combined organic layer was washed with brine and dried over anhydrous Na<sub>2</sub>SO<sub>4</sub>. The solvent was removed under vacuum and the residue was purified by a flash column chromatography on silica gel using ethyl acetate and petroleum as eluent.

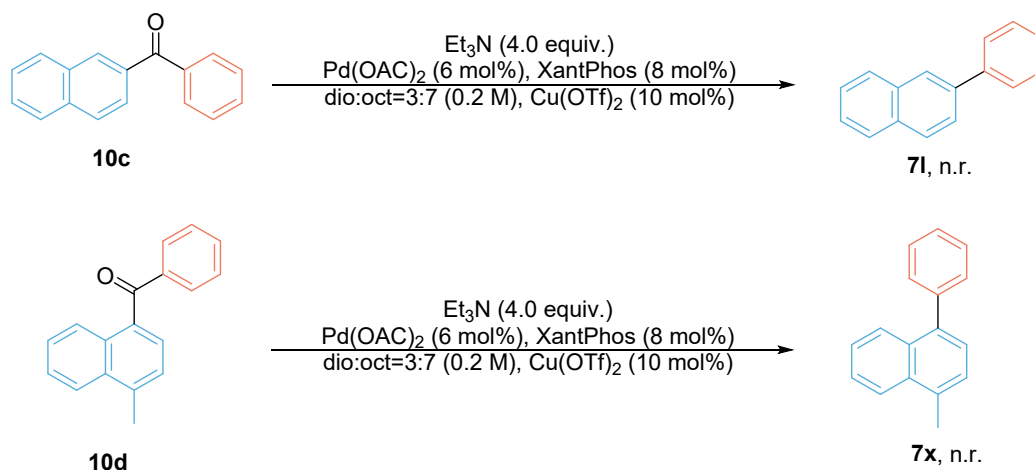

**Experimental procedure for the preparation of 7l or 7x from intermediate 10c or 10d.** A 25 mL Schlenk flask equipped with a stirring bar is filled with **10c** or **10d** (0.2 mmol, 1.0 equiv.), Et<sub>3</sub>N (0.8 mmol, 4.0 equiv.), Pd(OAc)<sub>2</sub> catalyst (6 mol%), XantPhos (8 mol%), Cu(OTf)<sub>2</sub> (10 mol%), and dioxane:octane=3:7 (1 mL, 0.2 M). Under a positive pressure of nitrogen and five evacuations/backfilling cycles under high vacuum. The mixture was allowed to react for 18 h. The reaction was quenched with water and the reaction mixture was extracted with ethyl acetate for three times. The combined organic layer was washed with brine and dried over anhydrous Na<sub>2</sub>SO<sub>4</sub>. The solvent was removed under vacuum and the residue was purified by a flash column chromatography on silica gel using ethyl acetate and petroleum as eluent.



## 5. Kinetic Isotope Effect Experiments.

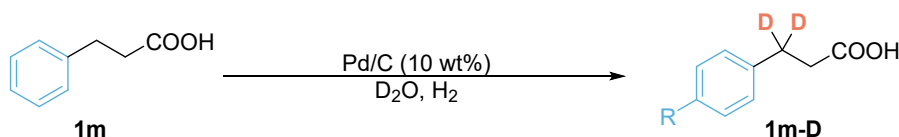

**Preparation of deuterated substrate 1m-D.** A 25 mL Schlenk flask equipped with a stirring bar is filled with alkylcarboxylic acid **1m** (neat, 0.5 mmol, 1.0 equiv.), 10%Pd/C (7.5 mg, 10 wt%), heavy water (1 mL, 0.5 M). Under positive pressure of  $\text{H}_2$ , five evacuation/backfill cycles are performed under high vacuum to fill the reaction tube and vigorous stirring at 55 °C for 24 hours. The reaction was quenched with water and the reaction mixture was extracted with ethyl acetate for three times. The combined organic layer was washed with brine and dried over anhydrous  $\text{Na}_2\text{SO}_4$ . The solvent was removed under vacuum to give the product **1m-D** (D content 92%,  $^1\text{H}$  NMR analysis was used to determine D content).

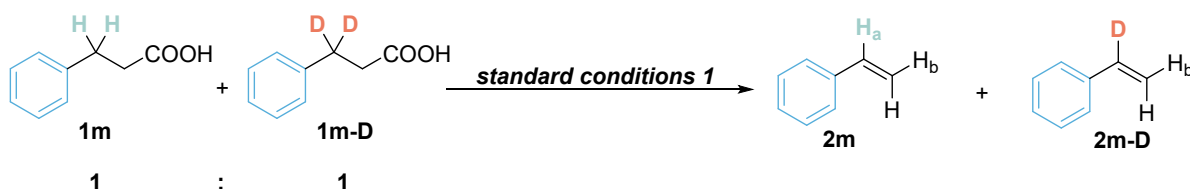

**Procedure for Kinetic Isotope Effect from Parallel Reactions.** A 25 mL Schlenk flask equipped with a stirring bar is filled with **1m** (0.1 mmol, 0.5 equiv.), **1m-D** (0.1 mmol, 0.5 equiv.),  $\text{Et}_3\text{N}$  (0.4 mmol, 2.0 equiv.), dichloroethane (1 mL, 0.2 M). Under positive pressure of  $\text{SO}_2\text{F}_2$  gas, five evacuation/backfill cycles are performed under high vacuum to fill the reaction tube and vigorous stirring at 45 °C for 8 hours. The reaction bottle is purged with nitrogen. After  $\text{Pd}(\text{OAc})_2$  (5 mol%), XantPhos (6 mol%) were added. Then heat up to 100 °C. The mixture was allowed to react for 4 h. After completion of the reaction 0.5 mL of reaction solution was taken and mixed with the internal standard (1,3,5-Trimethoxybenzene, 0.1 mmol) and the deuterated product content was detected by  $^1\text{H}$  NMR. A crude NMR spectrum of the residue was obtained in 0.6 mL  $\text{CDCl}_3$ .

**Data Analysis.** After Fourier transform of the FID, an auto-baseline correction protocol was applied to the spectra and the spectra were manually integrated. The integration values of the aromatic peak of the methyl 1,3,5-Trimethoxybenzene standard (6.00 ppm, single-peak) and the  $\text{H}_b$  proton of the styrene product (5.17 ppm) were used to calculate the concentration of product (**2m** and **2m-D**) in the reaction. Subsequently, based on the ratio of the peak areas of the two products ( $P(\text{H}_a)/P(\text{H}_b-\text{H}_a)$ ), a KIE of 2.7 was obtained. (Calculated by taking the average of five experiments.)

## Computational Details

DFT calculations were performed with Gaussian 16<sup>9</sup> program. All molecular geometries were optimized in gas phase at the B3LYP<sup>10</sup>/6-31G(d)<sup>11</sup> (SDD<sup>12</sup> basis set for Pd and Cu) level of theory at 298.15 K & 337.15K and 1 atm with Grimme's D3<sup>13</sup> dispersion correction using SMD<sup>14</sup> as the solvation mode in Octane. Optimized minima and transition states (TSs) were verified by harmonic vibrational analysis to have no and one proper imaginary frequency, respectively. To refine calculated energies, single point calculations with larger basis set 6-311G(d,p)<sup>15</sup> were then performed based on these optimized structures by using the same B3LYP-D3BJ functional with SMD<sup>14</sup> as the solvation mode in Octane.

Table S12: Summary of barriers to each key step in acyl fluoride formation.

| Barrier                   | Substrate (kcal/mol) |
|---------------------------|----------------------|
| Ph(C=O)OSO <sub>2</sub> F | 103.6                |
| Ph(C=O)F                  | 102.9                |

Table S13: Summary of the barriers for each key step in the catalytic cycle.

| Barrier                                           | Substrate (kcal/mol) |
|---------------------------------------------------|----------------------|
| Oxidative addition                                | 13.1                 |
| Decarbonylation from Ph-[Pd <sup>II</sup> ]-C(O)F | 7.8                  |
| Transmetalisation                                 | 31.8                 |
| Reductive elimination                             | 45.2                 |

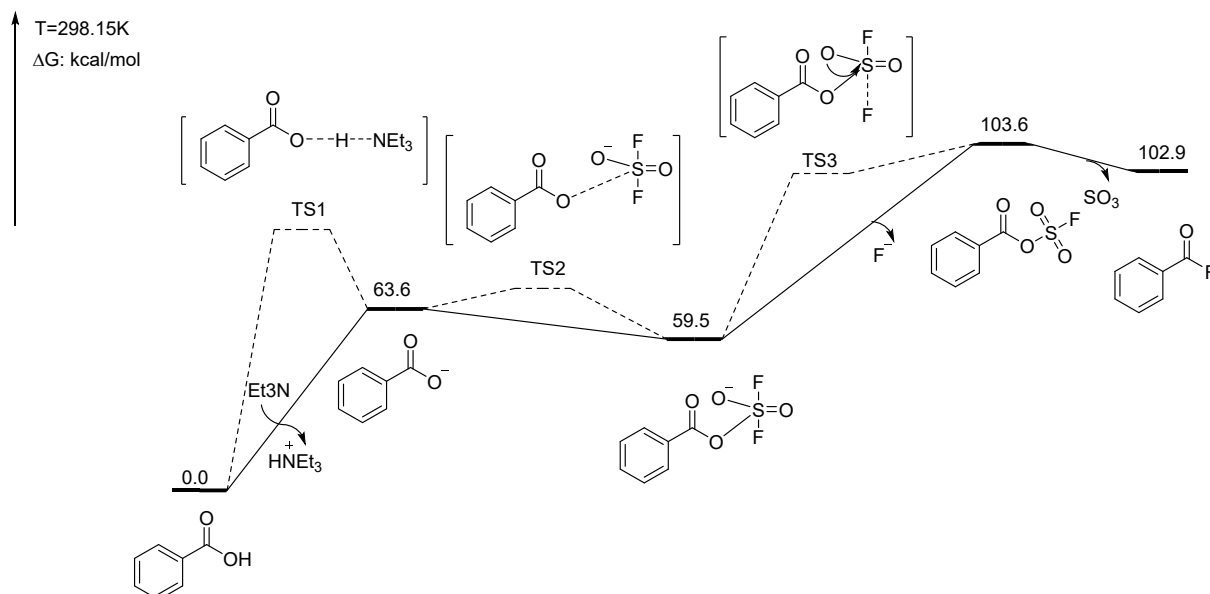

**Figure S2.** DFT calculations of aryl carboxylic acids activated by  $\text{SO}_2\text{F}_2$ .

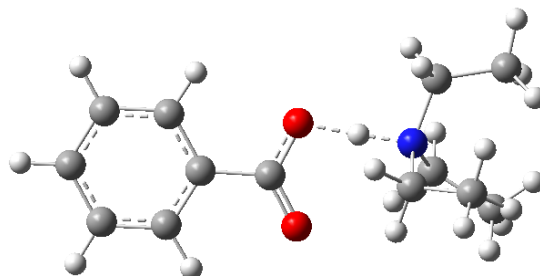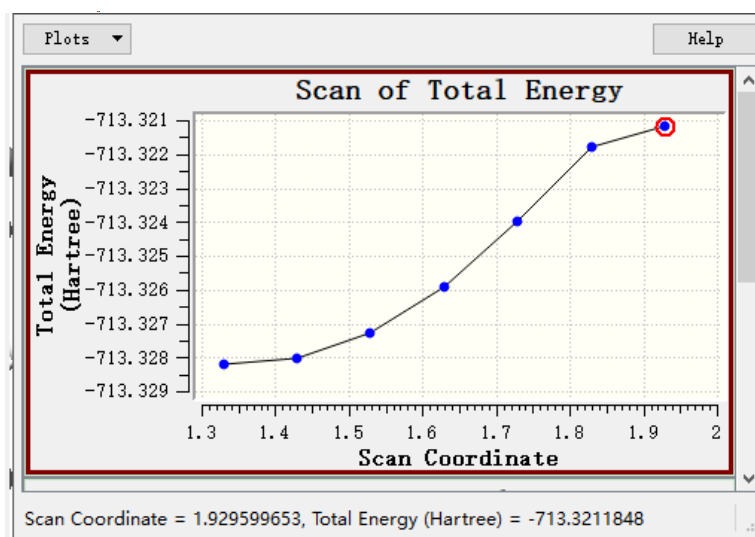

**Figure S3.** TS1s.log.

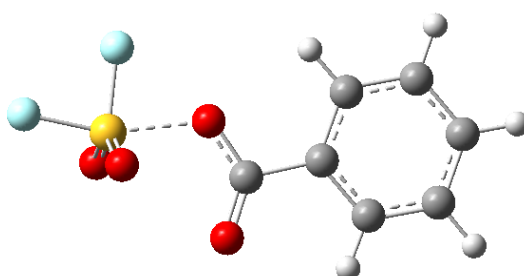

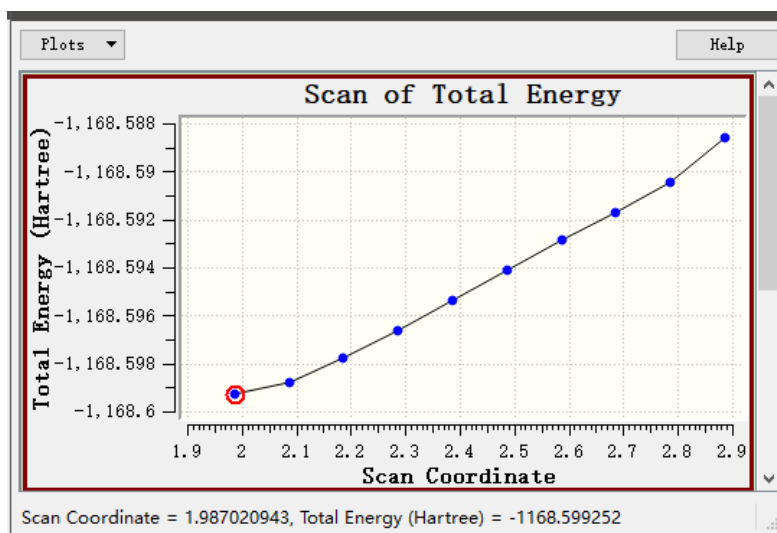

Figure S4. TS2s.log.

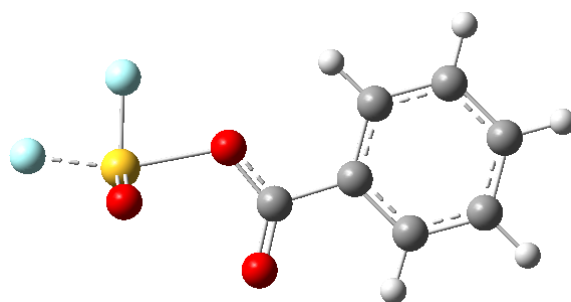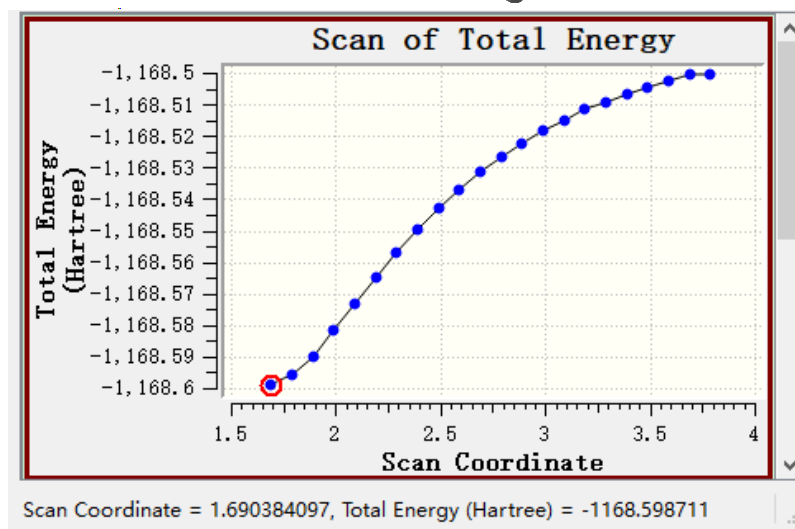

Figure S5. TS3s.log.

## II. Experimental Characterization Data

### Alkenylation Products of Alkyl Carboxylic Acids.

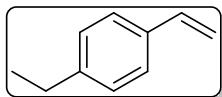

#### 1-ethyl-4-vinylbenzene (2a)

Reaction performed according to condition 1; purified by chromatography on silica gel (Petroleum ether). Colourless oil, 93% yield, 24.6 mg.

**<sup>1</sup>H NMR** (400 MHz, CDCl<sub>3</sub>) δ 7.34 (d, J = 8.1 Hz, 2H), 7.17 (d, J = 8.1 Hz, 2H), 6.70 (dd, J = 17.6, 10.9 Hz, 1H), 5.71 (d, J = 17.6 Hz, 1H), 5.19 (d, J = 10.9 Hz, 1H), 2.65 (q, J = 7.6 Hz, 2H), 1.24 (t, J = 7.6 Hz, 3H).

**<sup>13</sup>C NMR** (101 MHz, CDCl<sub>3</sub>) δ 144.07, 136.73, 135.08, 128.05, 126.20, 112.87, 28.64, 15.61.

**HRMS** (EI-TOF) calcd for C<sub>10</sub>H<sub>12</sub>: 132.0939; Found : 132.0940.

NMR spectroscopic data agreed with literature values.<sup>16</sup>

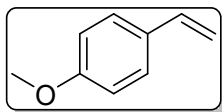

#### 1-methoxy-4-vinylbenzene (2b)

Reaction performed according to condition 1; purified by chromatography on silica gel (Petroleum ether : Ethyl acetate = 10 : 1). Colourless oil, 99% yield, 26.5 mg.

**<sup>1</sup>H NMR** (400 MHz, CDCl<sub>3</sub>) δ 7.38 (d, J = 8.8 Hz, 2H), 6.89 (d, J = 8.8 Hz, 2H), 6.69 (dd, J = 17.6, 10.9 Hz, 1H), 5.64 (d, J = 17.6 Hz, 1H), 5.15 (d, J = 10.9 Hz, 1H), 3.84 (s, 3H).

**<sup>13</sup>C NMR** (101 MHz, CDCl<sub>3</sub>) δ 159.36, 136.22, 130.44, 127.40, 111.60, 55.32.

**HRMS** (EI-TOF) calcd for C<sub>9</sub>H<sub>10</sub>O: 134.0732; Found : 134.0735.

NMR spectroscopic data agreed with literature values.<sup>16</sup>

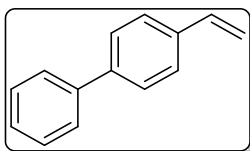

#### 4-vinyl-1,1'-biphenyl (2c)

Reaction performed according to condition 1; purified by chromatography on silica gel (Petroleum ether). white solid, 97% yield, 26.0 mg.

**<sup>1</sup>H NMR** (400 MHz, CDCl<sub>3</sub>) δ 7.61 (dd, J = 12.7, 7.7 Hz, 4H), 7.51 (d, J = 7.4 Hz, 2H), 7.46 (t, J = 7.6 Hz, 2H), 7.36 (t, J = 7.3 Hz, 1H), 6.89 – 6.69 (m, 1H), 5.82 (d, J = 17.6 Hz, 1H), 5.31 (s, 1H).

**<sup>13</sup>C NMR** (101 MHz, CDCl<sub>3</sub>) δ 140.77, 140.62, 136.63, 136.44, 128.82, 127.35, 127.27, 127.01, 126.68, 113.94.

**HRMS** (EI-TOF) calcd for C<sub>9</sub>H<sub>10</sub>O: 134.0732; Found : 134.0735.

NMR spectroscopic data agreed with literature values.<sup>17</sup>

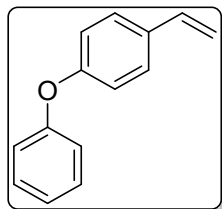

### 1-phenoxy-4-vinylbenzene (2d)

Reaction performed according to condition 1; purified by chromatography on silica gel (Petroleum ether : Ethyl acetate = 20 : 1). Colourless oil, 94% yield, 36.8 mg.

**<sup>1</sup>H NMR** (400 MHz, CDCl<sub>3</sub>) δ 7.51 – 7.34 (m, 4H), 7.18 (t, J = 7.4 Hz, 1H), 7.10 (d, J = 8.1 Hz, 2H), 7.05 (d, J = 8.6 Hz, 2H), 6.77 (dd, J = 17.6, 10.9 Hz, 1H), 5.74 (d, J = 17.6 Hz, 1H), 5.27 (d, J = 10.9 Hz, 1H).

**<sup>13</sup>C NMR** (101 MHz, CDCl<sub>3</sub>) δ 157.24, 157.09, 136.14, 132.93, 129.88, 127.70, 123.45, 119.03, 118.96, 112.95.

**HRMS** (EI-TOF) calcd for C<sub>14</sub>H<sub>12</sub>O: 196.0888; Found : 196.0889.

NMR spectroscopic data agreed with literature values.<sup>18</sup>

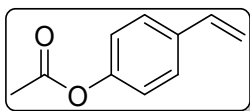

### 4-vinylphenyl acetate (2e)

Reaction performed according to condition 1; purified by chromatography on silica gel (Petroleum ether : Ethyl acetate = 10 : 1). Colourless oil, 81% yield, 26.3 mg.

**<sup>1</sup>H NMR** (400 MHz, CDCl<sub>3</sub>) δ 7.41 (d, J = 8.6 Hz, 2H), 7.05 (d, J = 8.6 Hz, 2H), 6.70 (dd, J = 17.6, 10.9 Hz, 1H), 5.70 (d, J = 17.6 Hz, 1H), 5.24 (d, J = 10.9 Hz, 1H), 2.30 (s, 3H).

**<sup>13</sup>C NMR** (101 MHz, CDCl<sub>3</sub>) δ 169.50, 150.20, 135.90, 135.40, 127.20, 121.64, 114.07, 21.16.

**HRMS** (EI-TOF) calcd for C<sub>10</sub>H<sub>10</sub>O<sub>2</sub>: 162.0681; Found : 162.0686.

NMR spectroscopic data agreed with literature values.<sup>19</sup>

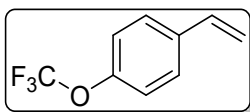

### 1-(trifluoromethoxy)-4-vinylbenzene (2f)

Reaction performed according to condition 1; purified by chromatography on silica gel (Petroleum ether : Ethyl acetate = 10 : 1). Colourless oil, 83% yield, 31.2 mg.

**<sup>1</sup>H NMR** (400 MHz, CDCl<sub>3</sub>) δ 7.42 (d, J = 8.8 Hz, 2H), 7.17 (d, J = 8.5 Hz, 2H), 6.70 (dd, J = 17.5, 10.9 Hz, 1H), 5.73 (d, J = 17.6 Hz, 1H), 5.29 (d, J = 11.0 Hz, 1H).

**<sup>19</sup>F NMR** (377 MHz, CDCl<sub>3</sub>) δ -57.86.

**HRMS** (EI-TOF) calcd for C<sub>9</sub>H<sub>7</sub>F<sub>3</sub>O: 188.0449; Found : 188.0450.

NMR spectroscopic data agreed with literature values.<sup>17</sup>

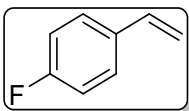

### 1-fluoro-4-vinylbenzene (2g)

Reaction performed according to condition 1; purified by chromatography on silica gel (Petroleum ether). Colourless oil, 87% yield, 21.2 mg.

**<sup>1</sup>H NMR** (400 MHz, CDCl<sub>3</sub>) δ 7.43 (dd, J = 8.9, 5.4 Hz, 2H), 7.07 (t, J = 8.7 Hz, 2H), 6.74 (dd, J = 17.6, 10.9 Hz, 1H), 5.73 (d, J = 17.5 Hz, 1H), 5.28 (d, J = 11.0 Hz, 1H).

**<sup>13</sup>C NMR** (101 MHz, CDCl<sub>3</sub>) δ 163.76, 161.31, 135.75, 133.80 (d, J = 2.9 Hz), 127.79 (d, J = 8.0 Hz), 115.44 (d, J = 21.1 Hz), 113.52 (d, J = 2.2 Hz).

**<sup>19</sup>F NMR** (377 MHz, CDCl<sub>3</sub>) δ -114.25.

**HRMS** (EI-TOF) calcd for C<sub>8</sub>H<sub>7</sub>F: 122.0532; Found : 122.0536.

NMR spectroscopic data agreed with literature values.<sup>17</sup>

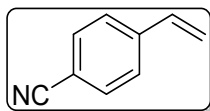

### 4-vinylbenzonitrile (2h)

Reaction performed according to condition 1; purified by chromatography on silica gel (Petroleum ether : Ethyl acetate = 10 : 1). yellow oil, 96% yield, 24.8 mg.

**<sup>1</sup>H NMR** (400 MHz, CDCl<sub>3</sub>) δ 7.60 (d, J = 8.4 Hz, 2H), 7.48 (d, J = 8.4 Hz, 2H), 6.72 (dd, J = 17.6, 10.9 Hz, 1H), 5.87 (d, J = 17.5 Hz, 1H), 5.44 (d, J = 11.0 Hz, 1H).

**<sup>13</sup>C NMR** (101 MHz, CDCl<sub>3</sub>) δ 141.90, 135.37, 132.41, 126.76, 118.95, 117.77, 111.11.

**HRMS** (EI-TOF) calcd for C<sub>9</sub>H<sub>7</sub>N: 129.0578; Found : 129.0577.

NMR spectroscopic data agreed with literature values.<sup>21</sup>

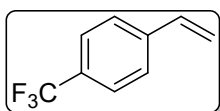

### 1-(trifluoromethyl)-4-vinylbenzene (2i)

Reaction performed according to condition 1; purified by chromatography on silica gel

(Petroleum ether). Colourless oil, 99% yield, 34.0 mg.

**<sup>1</sup>H NMR** (400 MHz, CDCl<sub>3</sub>) δ 7.58 (d, J = 8.3 Hz, 2H), 7.50 (d, J = 8.4 Hz, 2H), 6.75 (dd, J = 17.6, 10.9 Hz, 1H), 5.85 (d, J = 17.6 Hz, 1H), 5.39 (d, J = 10.9 Hz, 1H).

**<sup>13</sup>C NMR** (101 MHz, CDCl<sub>3</sub>) δ 140.94, 135.64, 129.87 (q, J = 32.3 Hz), 126.40, 125.51 (q, J = 4.0 Hz), 123.01, 116.50.

**<sup>19</sup>F NMR** (377 MHz, CDCl<sub>3</sub>) δ -62.51.

**HRMS** (EI-TOF) calcd for C<sub>9</sub>H<sub>7</sub>F<sub>3</sub>: 172.0500; Found : 172.0505.

NMR spectroscopic data agreed with literature values.<sup>16</sup>

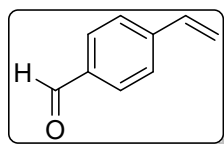

#### 4-vinylbenzaldehyde (2j)

Reaction performed according to condition 1; purified by chromatography on silica gel (Petroleum ether : Ethyl acetate = 10 : 1). Colourless oil, 90% yield, 23.8 mg.

**<sup>1</sup>H NMR** (400 MHz, CDCl<sub>3</sub>) δ 9.98 (s, 1H), 7.83 (d, J = 8.3 Hz, 2H), 7.53 (d, J = 8.4 Hz, 2H), 6.76 (dd, J = 17.6, 10.9 Hz, 1H), 5.90 (d, J = 17.6 Hz, 1H), 5.43 (d, J = 10.9 Hz, 1H).

**<sup>13</sup>C NMR** (101 MHz, CDCl<sub>3</sub>) δ 191.70, 143.43, 135.88, 135.66, 130.08, 126.74, 117.46.

**HRMS** (EI-TOF) calcd for C<sub>9</sub>H<sub>8</sub>O: 132.0575; Found : 132.0575.

NMR spectroscopic data agreed with literature values.<sup>21</sup>

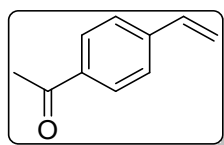

#### 1-(4-vinylphenyl)ethan-1-one (2k)

Reaction performed according to condition 1; purified by chromatography on silica gel (Petroleum ether : Ethyl acetate = 10 : 1). yellow solid, 84% yield, 24.5 mg.

**<sup>1</sup>H NMR** (400 MHz, CDCl<sub>3</sub>) δ 7.92 (d, J = 8.4 Hz, 2H), 7.48 (d, J = 8.4 Hz, 2H), 6.76 (dd, J = 17.6, 10.9 Hz, 1H), 5.88 (d, J = 17.6 Hz, 1H), 5.40 (d, J = 10.9 Hz, 1H), 2.60 (s, 3H).

**<sup>13</sup>C NMR** (101 MHz, CDCl<sub>3</sub>) δ 197.63, 142.10, 136.29, 135.94, 128.74, 126.32, 116.76, 26.64.

**HRMS** (EI-TOF) calcd for C<sub>10</sub>H<sub>10</sub>O: 146.0732; Found : 146.0732.

NMR spectroscopic data agreed with literature values.<sup>21</sup>

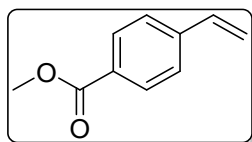

#### methyl 4-vinylbenzoate (2l)

Reaction performed according to condition 1; purified by chromatography on silica gel



(Petroleum ether : Ethyl acetate = 10 : 1). White solid, 65% yield, 21.1 mg.

**<sup>1</sup>H NMR** (400 MHz, CDCl<sub>3</sub>) δ 7.99 (d, J = 8.5 Hz, 2H), 7.45 (d, J = 8.5 Hz, 2H), 6.74 (dd, J = 17.6, 10.9 Hz, 1H), 5.85 (d, J = 17.5 Hz, 1H), 5.37 (d, J = 11.0 Hz, 1H), 3.90 (s, 3H).

**<sup>13</sup>C NMR** (101 MHz, CDCl<sub>3</sub>) δ 166.81, 141.90, 136.01, 129.88, 129.27, 126.11, 116.44, 52.04.

**HRMS** (EI-TOF) calcd for C<sub>10</sub>H<sub>10</sub>O<sub>2</sub>: 162.0681; Found : 162.0686.

NMR spectroscopic data agreed with literature values.<sup>21</sup>

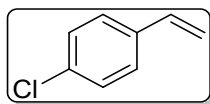

### 1-chloro-4-vinylbenzene (3a)

Reaction performed according to condition 1; purified by chromatography on silica gel (Petroleum ether). Yellow oil, 96% yield, 26.5 mg.

**<sup>1</sup>H NMR** (400 MHz, CDCl<sub>3</sub>) δ 7.31 (q, J = 8.6 Hz, 4H), 6.67 (dd, J = 17.6, 10.9 Hz, 1H), 5.73 (d, J = 17.6 Hz, 1H), 5.27 (d, J = 10.9 Hz, 1H).

**<sup>13</sup>C NMR** (101 MHz, CDCl<sub>3</sub>) δ 136.04, 135.68, 133.44, 128.70, 127.45, 114.49.

**HRMS** (EI-TOF) calcd for C<sub>8</sub>H<sub>7</sub>Cl: 138.0236; Found : 138.0238.

NMR spectroscopic data agreed with literature values.<sup>22</sup>

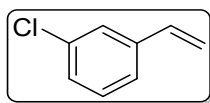

### 1-chloro-3-vinylbenzene (3b)

Reaction performed according to condition 1; purified by chromatography on silica gel (Petroleum ether). Yellow oil, 89% yield, 24.6 mg.

**<sup>1</sup>H NMR** (400 MHz, CDCl<sub>3</sub>) δ 7.31 δ 7.43 (s, 1H), 7.27 (t, J = 6.4 Hz, 3H), 6.69 (dd, J = 17.5, 10.9 Hz, 1H), 5.79 (d, J = 17.5 Hz, 1H), 5.34 (d, J = 10.9 Hz, 1H).

**<sup>13</sup>C NMR** (101 MHz, CDCl<sub>3</sub>) δ 139.46, 135.67, 134.57, 129.79, 127.81, 126.24, 124.52, 115.36.

**HRMS** (EI-TOF) calcd for C<sub>8</sub>H<sub>7</sub>Cl: 138.0236; Found : 138.0238.

NMR spectroscopic data agreed with literature values.<sup>22</sup>

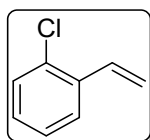

### 1-chloro-2-vinylbenzene (3c)

Reaction performed according to condition 1; purified by chromatography on silica gel (Petroleum ether). Yellow oil, 81% yield, 22.4 mg.

**<sup>1</sup>H NMR** (400 MHz, CDCl<sub>3</sub>) δ 7.61 (d, J = 7.6 Hz, 1H), 7.40 (d, J = 7.8 Hz, 1H), 7.29 – 7.13 (m, 3H), 5.79 (d, J = 17.6 Hz, 1H), 5.43 (d, J = 11.0 Hz, 1H).

$^{13}\text{C}$  NMR (101 MHz,  $\text{CDCl}_3$ )  $\delta$  135.75, 133.23, 133.15, 129.68, 128.85, 126.85, 126.59, 116.56.

**HRMS** (EI-TOF) calcd for  $\text{C}_8\text{H}_7\text{Cl}$ : 138.0236; Found : 138.0238.

NMR spectroscopic data agreed with literature values.<sup>22</sup>

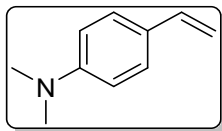

### N,N-dimethyl-4-vinylaniline (3d)

Reaction performed according to condition 1; purified by chromatography on silica gel (Petroleum ether : Ethyl acetate = 10 : 1). Yellow solid, 86% yield, 25.3 mg.

$^1\text{H}$  NMR (400 MHz,  $\text{CDCl}_3$ )  $\delta$  7.39 (d,  $J$  = 8.9 Hz, 2H), 6.81 – 6.66 (m, 3H), 5.63 (d,  $J$  = 17.6 Hz, 1H), 5.11 (d,  $J$  = 10.9 Hz, 1H), 3.03 (s, 6H).

$^{13}\text{C}$  NMR (101 MHz,  $\text{CDCl}_3$ )  $\delta$  150.33, 136.71, 127.23, 126.28, 112.40, 109.40, 40.57.

**HRMS** (EI-TOF) calcd for  $\text{C}_{10}\text{H}_{13}\text{N}$ : 147.1048; Found : 147.1058.

NMR spectroscopic data agreed with literature values.<sup>21</sup>

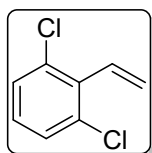

### 1,3-dichloro-2-vinylbenzene (3e)

Reaction performed according to condition 1; purified by chromatography on silica gel (Petroleum ether). Yellow oil, 64% yield, 22.0 mg.

$^1\text{H}$  NMR (400 MHz,  $\text{CDCl}_3$ )  $\delta$  7.34 (d,  $J$  = 8.0 Hz, 2H), 7.11 (t,  $J$  = 8.1 Hz, 1H), 6.75 (dd,  $J$  = 17.9, 11.7 Hz, 1H), 5.88 – 5.72 (m, 2H).

$^{13}\text{C}$  NMR (101 MHz,  $\text{CDCl}_3$ )  $\delta$  135.05, 134.29, 130.93, 128.44, 128.25, 122.94.

**HRMS** (EI-TOF) calcd for  $\text{C}_8\text{H}_6\text{Cl}_2$ : 171.9847; Found : 171.9850.

NMR spectroscopic data agreed with literature values.<sup>22</sup>

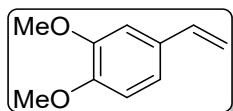

### 1,2-dimethoxy-4-vinylbenzene (3f)

Reaction performed according to condition 1; purified by chromatography on silica gel (Petroleum ether : Ethyl acetate = 5 : 1). Yellow oil, 92% yield, 30.2 mg.

$^1\text{H}$  NMR (400 MHz,  $\text{CDCl}_3$ )  $\delta$  7.01 – 6.91 (m, 2H), 6.82 (d,  $J$  = 8.1 Hz, 1H), 6.65 (dd,  $J$  = 17.5, 10.9 Hz, 1H), 5.62 (d,  $J$  = 17.5 Hz, 1H), 5.15 (d,  $J$  = 10.8 Hz, 1H), 3.91 (s, 3H), 3.88 (s, 3H).

$^{13}\text{C}$  NMR (101 MHz,  $\text{CDCl}_3$ )  $\delta$  149.01, 148.97, 136.50, 130.73, 119.47, 111.84, 111.01, 108.49, 55.94, 55.83.

**HRMS** (EI-TOF) calcd for  $C_{10}H_{12}O_2$ : 164.0837; Found : 164.0841.

NMR spectroscopic data agreed with literature values.<sup>17</sup>

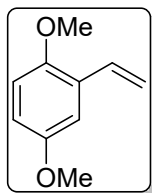

### 1,4-dimethoxy-2-vinylbenzene (3g)

Reaction performed according to condition 1; purified by chromatography on silica gel (Petroleum ether : Ethyl acetate = 5 : 1). Yellow solid, 99% yield, 32.5 mg.

**<sup>1</sup>H NMR** (400 MHz,  $CDCl_3$ )  $\delta$  7.12 – 6.93 (m, 2H), 6.80 (d,  $J = 4.4$  Hz, 2H), 5.73 (dt,  $J = 17.8, 1.2$  Hz, 1H), 5.28 (dt,  $J = 11.1, 1.2$  Hz, 1H), 3.80 (d,  $J = 6.8$  Hz, 6H).

**<sup>13</sup>C NMR** (101 MHz,  $CDCl_3$ )  $\delta$  153.69, 151.23, 131.52, 127.61, 114.72, 113.80, 112.25, 111.88, 56.26, 55.76.

**HRMS** (EI-TOF) calcd for  $C_{10}H_{12}O_2$ : 164.0837; Found : 164.0841.

NMR spectroscopic data agreed with literature values.<sup>23</sup>

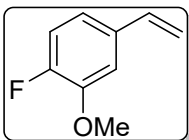

### 1-fluoro-2-methoxy-4-vinylbenzene (3h)

Reaction performed according to condition 1; purified by chromatography on silica gel (Petroleum ether : Ethyl acetate = 10 : 1). Pink oil, 73% yield, 22.2 mg.

**<sup>1</sup>H NMR** (400 MHz,  $CDCl_3$ )  $\delta$  7.03 (dd,  $J = 10.9, 8.3$  Hz, 2H), 6.96 – 6.90 (m, 1H), 6.66 (dd,  $J = 17.6, 10.9$  Hz, 1H), 5.67 (d,  $J = 17.5$  Hz, 1H), 5.23 (d,  $J = 10.9$  Hz, 1H), 3.91 (s, 3H).

**<sup>13</sup>C NMR** (101 MHz,  $CDCl_3$ )  $\delta$  153.46, 151.01, 147.65 (d,  $J = 10.9$  Hz), 136.03, 134.22 (d,  $J = 4.4$  Hz), 119.08 (d,  $J = 7.3$  Hz), 116.07, 115.88, 113.63 (d,  $J = 2.9$  Hz), 110.84 (d,  $J = 2.2$  Hz), 56.17.

**<sup>19</sup>F NMR** (377 MHz,  $CDCl_3$ )  $\delta$  -136.02.

**HRMS** (EI-TOF) calcd for  $C_9H_9FO$ : 152.0637; Found : 152.0631.

NMR spectroscopic data agreed with literature values.

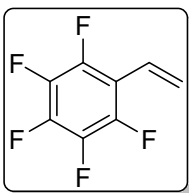

### 1,2,3,4,5-pentafluoro-6-vinylbenzene (3i)

Reaction performed according to condition 1; purified by chromatography on silica gel (Petroleum ether : Ethyl acetate = 10 : 1). Colourless oil, 51% yield, 19.8 mg.

**<sup>1</sup>H NMR** (400 MHz, CDCl<sub>3</sub>) δ 6.62 (dd, J = 18.1, 11.9 Hz, 1H), 6.07 (d, J = 18.0 Hz, 1H), 5.71 (d, J = 11.9 Hz, 1H).

**<sup>13</sup>C NMR** (101 MHz, CDCl<sub>3</sub>) δ 146.38 – 145.89 (m), 143.94 – 143.38 (m), 141.63 – 140.97 (m), 139.21 – 138.42 (m), 136.80 – 135.94 (m), 123.49 (td, J = 7.3, 2.9 Hz), 121.35 (d, J = 2.9 Hz), 112.17 (td, J = 13.8, 4.4 Hz).

**<sup>19</sup>F NMR** (377 MHz, CDCl<sub>3</sub>)

**HRMS** (EI-TOF) calcd for C<sub>8</sub>H<sub>3</sub>F<sub>5</sub>: 194.0155; Found : 194.0156.

NMR spectroscopic data agreed with literature values.<sup>24</sup>

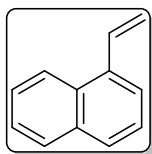

### 1-vinylnaphthalene (3j)

Reaction performed according to condition 1; purified by chromatography on silica gel (Petroleum ether : Ethyl acetate = 30 : 1). Colourless oil, 69% yield, 21.2 mg.

**<sup>1</sup>H NMR** (400 MHz, CDCl<sub>3</sub>) δ 8.13 (d, J = 7.8 Hz, 1H), 7.83 (dd, J = 25.5, 7.9 Hz, 2H), 7.64 (d, J = 7.3 Hz, 1H), 7.57 – 7.38 (m, 4H), 5.80 (d, J = 18.8 Hz, 1H), 5.49 (d, J = 9.5 Hz, 1H).

**<sup>13</sup>C NMR** (101 MHz, CDCl<sub>3</sub>) δ 135.61, 134.39, 133.59, 131.11, 128.52, 128.10, 126.06, 125.76, 125.64, 123.77, 123.63, 117.12.

**HRMS** (EI-TOF) calcd for C<sub>12</sub>H<sub>10</sub>: 154.0783; Found : 154.0788.

NMR spectroscopic data agreed with literature values.<sup>18</sup>

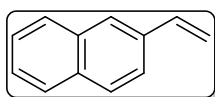

### 2-vinylnaphthalene (3k)

Reaction performed according to condition 1; purified by chromatography on silica gel (Petroleum ether : Ethyl acetate = 30 : 1). Colourless oil, 91% yield, 28.0 mg.

**<sup>1</sup>H NMR** (400 MHz, CDCl<sub>3</sub>) δ 7.86 (dd, J = 7.9, 4.7 Hz, 3H), 7.81 (s, 1H), 7.70 (d, J = 8.6 Hz, 1H), 7.65 – 7.38 (m, 2H), 6.94 (dd, J = 17.5, 10.9 Hz, 1H), 5.94 (d, J = 17.5 Hz, 1H), 5.40 (d, J = 10.9 Hz, 1H).

**<sup>13</sup>C NMR** (101 MHz, CDCl<sub>3</sub>) δ 136.99, 135.06, 133.61, 133.21, 128.20, 128.10, 127.72, 126.44, 126.28, 125.96, 123.23, 114.23.

**HRMS** (EI-TOF) calcd for C<sub>12</sub>H<sub>10</sub>: 154.0783; Found : 154.0788.

NMR spectroscopic data agreed with literature values.<sup>18</sup>

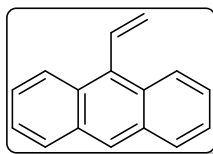

### 9-vinylanthracene (3l)

Reaction performed according to condition 1; purified by chromatography on silica gel (Petroleum ether : Ethyl acetate = 30 : 1). Yellow solid, 88% yield, 35.9 mg.

**<sup>1</sup>H NMR** (400 MHz, CDCl<sub>3</sub>) δ 8.40 (s, 1H), 8.38 – 8.28 (m, 2H), 8.08 – 7.96 (m, 2H), 7.57 – 7.45 (m, 5H), 6.03 (d, J = 11.5 Hz, 1H), 5.66 (d, J = 17.9 Hz, 1H).

**<sup>13</sup>C NMR** (101 MHz, CDCl<sub>3</sub>) δ 133.68, 133.57, 131.45, 129.26, 128.63, 126.36, 126.03, 125.39, 125.14, 122.93.

**HRMS** (EI-TOF) calcd for C<sub>16</sub>H<sub>12</sub>: 204.0939; Found : 204.0944.

NMR spectroscopic data agreed with literature values.<sup>18</sup>

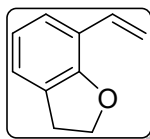

### 7-vinyl-2,3-dihydrobenzofuran (3m)

Reaction performed according to condition 1; purified by chromatography on silica gel (Petroleum ether : Ethyl acetate = 10 : 1). Colourless oil, 77% yield, 22.5 mg.

**<sup>1</sup>H NMR** (400 MHz, CDCl<sub>3</sub>) δ 7.17 (t, J = 7.8 Hz, 1H), 7.05 (d, J = 7.8 Hz, 1H), 6.77 (dd, J = 17.2, 9.6 Hz, 2H), 5.77 (d, J = 17.6 Hz, 1H), 5.40 (d, J = 11.1 Hz, 1H), 4.63 (t, J = 8.8 Hz, 2H), 3.29 (t, J = 8.8 Hz, 2H).

**<sup>13</sup>C NMR** (101 MHz, CDCl<sub>3</sub>) δ 160.37, 134.81, 134.46, 128.16, 124.92, 117.78, 115.64, 108.54, 71.08, 29.15.

**HRMS** (EI-TOF) calcd for C<sub>10</sub>H<sub>10</sub>O: 146.0732; Found : 146.0736.

NMR spectroscopic data agreed with literature values.<sup>25</sup>

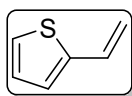

### 2-vinylthiophene (3n)

Reaction performed according to condition 1; purified by chromatography on silica gel (Petroleum ether : Ethyl acetate = 20 : 1). Yellow oil, 86% yield, 18.9 mg.

**<sup>1</sup>H NMR** (400 MHz, CDCl<sub>3</sub>) δ 7.16 (d, J = 4.5 Hz, 1H), 6.97 (d, J = 4.6 Hz, 2H), 6.81 (dd, J = 17.3, 10.8 Hz, 1H), 5.57 (d, J = 17.3 Hz, 1H), 5.14 (d, J = 10.9 Hz, 1H).

**<sup>13</sup>C NMR** (101 MHz, CDCl<sub>3</sub>) δ 143.06, 129.87, 127.32, 125.79, 124.33, 113.26.

**HRMS** (EI-TOF) calcd for C<sub>6</sub>H<sub>6</sub>S: 110.0190; Found : 110.0192.

NMR spectroscopic data agreed with literature values.<sup>21</sup>

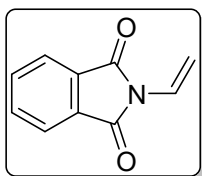

### 2-vinylisindoline-1,3-dione (3o)

Reaction performed according to condition 1; purified by chromatography on silica gel (Petroleum ether : Ethyl acetate = 10 : 1). Yellow solid, 60% yield, 20.8 mg.

**<sup>1</sup>H NMR** (400 MHz, CDCl<sub>3</sub>) δ 7.88 (dd, J = 5.4, 3.1 Hz, 2H), 7.75 (dd, J = 5.6, 3.1 Hz, 2H), 6.88 (dd, J = 16.5, 9.9 Hz, 1H), 6.09 (d, J = 16.4 Hz, 1H), 5.05 (d, J = 9.9 Hz, 1H).

**<sup>13</sup>C NMR** (101 MHz, CDCl<sub>3</sub>) δ 166.46, 134.49, 131.62, 123.81, 123.64, 104.49.

**HRMS** (EI-TOF) calcd for C<sub>10</sub>H<sub>7</sub>NO<sub>2</sub>: 173.0477; Found : 173.0480.

NMR spectroscopic data agreed with literature values.<sup>26</sup>

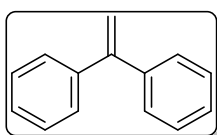

### ethene-1,1-diyl dibenzene (3p)

Reaction performed according to condition 1; purified by chromatography on silica gel (Petroleum ether : Ethyl acetate = 20 : 1). White solid, 92% yield, 33.1 mg.

**<sup>1</sup>H NMR** (400 MHz, CDCl<sub>3</sub>) δ 7.36 (s, 10H), 5.48 (s, 2H).

**<sup>13</sup>C NMR** (101 MHz, CDCl<sub>3</sub>) δ 150.08, 141.51, 128.30, 128.19, 127.74, 114.34.

**HRMS** (EI-TOF) calcd for C<sub>14</sub>H<sub>12</sub>: 180.0939; Found : 180.0939.

NMR spectroscopic data agreed with literature values.<sup>27</sup>

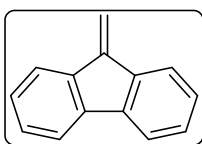

### 9-methylene-9H-fluorene (3q)

Reaction performed according to condition 1; purified by chromatography on silica gel (Petroleum ether : Ethyl acetate = 30 : 1). White solid, 94% yield, 33.5 mg.

**<sup>1</sup>H NMR** (400 MHz, CDCl<sub>3</sub>) δ 7.78 (dd, J = 17.4, 7.4 Hz, 4H), 7.45 (t, J = 7.4 Hz, 2H), 7.41 – 7.32 (m, 2H), 6.14 (s, 2H).

**<sup>13</sup>C NMR** (101 MHz, CDCl<sub>3</sub>) δ 143.43, 140.23, 138.10, 128.80, 127.12, 121.08, 119.82, 107.84.

**HRMS** (EI-TOF) calcd for C<sub>14</sub>H<sub>10</sub>: 178.0783; Found : 178.0788.

NMR spectroscopic data agreed with literature values.<sup>27</sup>

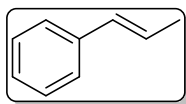

### (*E*)-prop-1-en-1-ylbenzene (3r)

Reaction performed according to condition 1; purified by chromatography on silica gel (Petroleum ether). Colourless oil, 91% yield, 33.5 mg.

**<sup>1</sup>H NMR** (400 MHz, CDCl<sub>3</sub>) δ 7.37 (t, *J* = 6.8 Hz, 3H), 7.32 (d, *J* = 8.0 Hz, 1H), 7.23 (t, *J* = 7.1 Hz, 1H), 6.45 (d, *J* = 16.0 Hz, 1H), 6.34 – 6.23 (m, 1H), 1.93 (d, *J* = 6.6 Hz, 3H).

**<sup>13</sup>C NMR** (101 MHz, CDCl<sub>3</sub>) δ 137.97, 131.06, 128.50, 126.76, 125.84, 125.72, 18.53.

**HRMS** (EI-TOF) calcd for C<sub>9</sub>H<sub>10</sub>: 118.0783; Found : 118.0780.

NMR spectroscopic data agreed with literature values.<sup>28</sup>

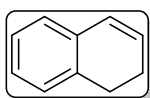

### 1,2-dihydronaphthalene (4a)

Reaction performed according to condition 1 (130 °C instead of 100 °C); purified by chromatography on silica gel (Petroleum ether : Ethyl acetate = 30 : 1). Colourless oil, 97% yield, 25.2 mg.

**<sup>1</sup>H NMR** (400 MHz, CDCl<sub>3</sub>) δ 7.35 (dq, *J* = 14.6, 7.3 Hz, 3H), 7.24 (d, *J* = 6.8 Hz, 1H), 6.69 (d, *J* = 9.6 Hz, 1H), 6.24 (dt, *J* = 9.3, 4.4 Hz, 1H), 3.01 (t, *J* = 8.3 Hz, 2H), 2.57 – 2.49 (m, 2H).

**<sup>13</sup>C NMR** (101 MHz, CDCl<sub>3</sub>) δ 135.64, 134.36, 128.81, 128.07, 127.76, 127.09, 126.67, 126.13, 27.73, 23.44.

**HRMS** (EI-TOF) calcd for C<sub>10</sub>H<sub>10</sub>: 130.0783; Found : 130.0783.

NMR spectroscopic data agreed with literature values.<sup>29</sup>

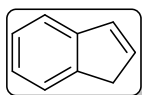

### 1H-indene (4b)

Reaction performed according to condition 1 (130 °C instead of 100 °C); purified by chromatography on silica gel (Petroleum ether). Colourless oil, 92% yield, 21.4 mg.

**<sup>1</sup>H NMR** (400 MHz, CDCl<sub>3</sub>) δ 7.74 – 7.67 (m, 1H), 7.66 – 7.59 (m, 1H), 7.55 – 7.47 (m, 1H), 7.47 – 7.37 (m, 1H), 7.11 (s, 1H), 6.77 (s, 1H), 3.59 (s, 2H).

**<sup>13</sup>C NMR** (101 MHz, CDCl<sub>3</sub>) δ 145.07, 143.88, 134.35, 132.31, 126.47, 124.78, 123.94, 121.19, 39.26.

**HRMS** (EI-TOF) calcd for C<sub>9</sub>H<sub>8</sub>: 116.0626; Found : 116.0629.

NMR spectroscopic data agreed with literature values.<sup>29</sup>

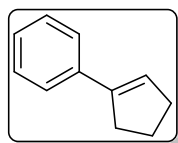

#### cyclopent-1-en-1-ylbenzene (4c)

Reaction performed according to condition 1 (130 °C instead of 100 °C); purified by chromatography on silica gel (Petroleum ether : Ethyl acetate = 30 : 1). Colourless solid, 69% yield, 19.9 mg.

**<sup>1</sup>H NMR** (400 MHz, CDCl<sub>3</sub>) δ 7.45 (d, J = 7.6 Hz, 2H), 7.32 (t, J = 7.5 Hz, 2H), 7.23 (q, J = 7.8 Hz, 1H), 6.20 (s, 1H), 2.73 (s, 2H), 2.55 (s, 2H), 2.04 (p, J = 7.5 Hz, 2H).

**<sup>13</sup>C NMR** (101 MHz, CDCl<sub>3</sub>) δ 142.45, 136.84, 128.28, 126.83, 126.12, 125.57, 33.37, 33.20, 23.39.

**HRMS** (EI-TOF) calcd for C<sub>11</sub>H<sub>12</sub>: 144.0939; Found : 144.0944.

NMR spectroscopic data agreed with literature values.<sup>30</sup>

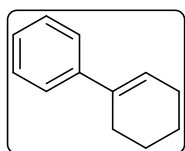

#### 2,3,4,5-tetrahydro-1,1'-biphenyl (4d)

Reaction performed according to condition 1 (130 °C instead of 100 °C); purified by chromatography on silica gel (Petroleum ether : Ethyl acetate = 30 : 1). Colourless oil, 85% yield, 26.9 mg.

**<sup>1</sup>H NMR** (400 MHz, CDCl<sub>3</sub>) δ 7.46 (d, J = 7.8 Hz, 2H), 7.37 (t, J = 7.6 Hz, 2H), 7.28 (t, J = 7.2 Hz, 1H), 6.20 (s, 1H), 2.49 (s, 2H), 2.28 (s, 2H), 1.85 (q, J = 5.8 Hz, 2H), 1.79 – 1.69 (m, 2H).

**<sup>13</sup>C NMR** (101 MHz, CDCl<sub>3</sub>) δ 142.78, 136.68, 128.26, 126.59, 125.02, 124.83, 27.49, 25.99, 23.18, 22.28.

**HRMS** (EI-TOF) calcd for C<sub>12</sub>H<sub>14</sub>: 158.1096; Found : 158.1102.

NMR spectroscopic data agreed with literature values.<sup>29</sup>

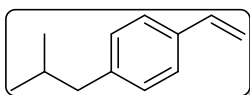

#### 1-isobutyl-4-vinylbenzene (5a)

Reaction performed according to condition 1; purified by chromatography on silica gel (Petroleum ether : Ethyl acetate = 20 : 1). Colourless oil, 97% yield, 31.0 mg.

**<sup>1</sup>H NMR** (400 MHz, CDCl<sub>3</sub>) δ 7.34 (d, J = 8.1 Hz, 2H), 7.12 (d, J = 8.1 Hz, 2H), 6.72 (dd, J = 17.6, 10.9 Hz, 1H), 5.73 (d, J = 17.6 Hz, 1H), 5.21 (d, J = 10.8 Hz, 1H), 2.48 (d, J = 7.3 Hz, 2H), 1.93 – 1.82 (m, 1H), 0.92 (d, J = 6.6 Hz, 6H).

**<sup>13</sup>C NMR** (101 MHz, CDCl<sub>3</sub>) δ 141.55, 136.78, 135.07, 129.31, 126.00, 112.82, 45.20, 30.27, 22.40.



**HRMS** (EI-TOF) calcd for  $C_{12}H_{16}$ : 160.1252; Found : 160.1255.

NMR spectroscopic data agreed with literature values.<sup>22</sup>

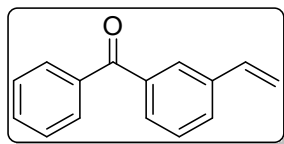

### phenyl(3-vinylphenyl)methanone (5b)

Reaction performed according to condition 1; purified by chromatography on silica gel (Petroleum ether : Ethyl acetate = 10 : 1). White oil, 83% yield, 31.0 mg.

**$^1H$  NMR** (400 MHz,  $CDCl_3$ )  $\delta$  7.92 – 7.78 (m, 3H), 7.74 – 7.57 (m, 3H), 7.49 (dt,  $J$  = 20.4, 7.8 Hz, 3H), 6.79 (dd,  $J$  = 17.5, 10.9 Hz, 1H), 5.84 (d,  $J$  = 17.5 Hz, 1H), 5.36 (d,  $J$  = 11.0 Hz, 1H).

**$^{13}C$  NMR** (101 MHz,  $CDCl_3$ )  $\delta$  196.72, 137.95, 137.81, 137.54, 135.99, 132.56, 130.10, 129.96, 129.44, 128.48, 128.36, 127.75, 115.34.

**HRMS** (EI-TOF) calcd for  $C_{15}H_{12}O$ : 208.0888; Found : 208.0896.

NMR spectroscopic data agreed with literature values.<sup>22</sup>

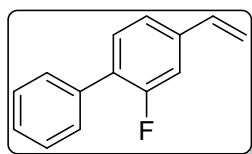

### 2-fluoro-4-vinyl-1,1'-biphenyl (5c)

Reaction performed according to condition 1; purified by chromatography on silica gel (Petroleum ether : Ethyl acetate = 10 : 1). Yellow oil, 88% yield, 34.9 mg.

**$^1H$  NMR** (400 MHz,  $CDCl_3$ )  $\delta$  7.58 (d,  $J$  = 8.0 Hz, 2H), 7.43 (dt,  $J$  = 23.9, 7.1 Hz, 4H), 7.29 – 7.20 (m, 2H), 6.73 (dd,  $J$  = 17.6, 10.9 Hz, 1H), 5.81 (d,  $J$  = 17.6 Hz, 1H), 5.34 (d,  $J$  = 10.9 Hz, 1H).

**$^{13}C$  NMR** (101 MHz,  $CDCl_3$ )  $\delta$  161.19, 158.73, 138.92 (d,  $J$  = 8.0 Hz), 135.60, 135.53 (d,  $J$  = 2.9 Hz), 130.75 (d,  $J$  = 4.4 Hz), 128.94 (d,  $J$  = 2.9 Hz), 128.49, 127.72, 122.43 (d,  $J$  = 2.9 Hz), 115.23, 113.43 (d,  $J$  = 23.3 Hz).

**$^{19}F$  NMR** (377 MHz,  $CDCl_3$ )  $\delta$  -118.37.

**HRMS** (EI-TOF) calcd for  $C_{14}H_{11}F$ : 198.0845; Found : 198.0841.

NMR spectroscopic data agreed with literature values.<sup>22</sup>

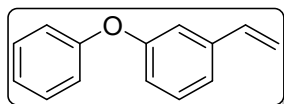

### 1-phenoxy-3-vinylbenzene (5d)

Reaction performed according to condition 1; purified by chromatography on silica gel (Petroleum ether : Ethyl acetate = 10 : 1). Colourless oil, 95% yield, 37.3 mg.

**<sup>1</sup>H NMR** (400 MHz, CDCl<sub>3</sub>) δ 7.33 (dt, J = 22.1, 7.7 Hz, 3H), 7.20 – 7.08 (m, 3H), 7.04 (d, J = 7.8 Hz, 2H), 6.92 (d, J = 8.1 Hz, 1H), 6.69 (dd, J = 17.6, 10.9 Hz, 1H), 5.74 (d, J = 17.5 Hz, 1H), 5.27 (d, J = 10.9 Hz, 1H).

**<sup>13</sup>C NMR** (101 MHz, CDCl<sub>3</sub>) δ 157.51, 157.24, 139.53, 136.32, 129.82, 129.79, 123.27, 121.38, 118.88, 118.34, 116.55, 114.66.

**HRMS** (EI-TOF) calcd for C<sub>14</sub>H<sub>12</sub>O: 196.0888; Found : 196.0892.

NMR spectroscopic data agreed with literature values.<sup>32</sup>

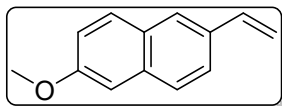

### 2-methoxy-6-vinylnaphthalene (5e)

Reaction performed according to condition 1; purified by chromatography on silica gel (Petroleum ether : Ethyl acetate = 10 : 1). White solids, 92% yield, 33.9 mg.

**<sup>1</sup>H NMR** (400 MHz, CDCl<sub>3</sub>) δ 7.74 – 7.67 (m, 3H), 7.61 (d, J = 8.6 Hz, 1H), 7.13 (d, J = 8.6 Hz, 2H), 6.85 (dd, J = 17.5, 10.9 Hz, 1H), 5.82 (d, J = 17.6 Hz, 1H), 5.28 (d, J = 10.9 Hz, 1H), 3.92 (d, J = 3.8 Hz, 3H).

**<sup>13</sup>C NMR** (101 MHz, CDCl<sub>3</sub>) δ 157.78, 136.95, 134.31, 132.97, 129.58, 127.02, 126.20, 123.76, 118.98, 113.13, 105.84, 55.34.

**HRMS** (EI-TOF) calcd for C<sub>13</sub>H<sub>12</sub>O: 184.0888; Found : 184.0880.

NMR spectroscopic data agreed with literature values.<sup>31</sup>

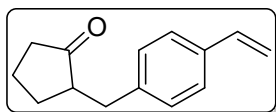

### 2-(4-vinylbenzyl)cyclopentan-1-one (5f)

Reaction performed according to condition 1; purified by chromatography on silica gel (Petroleum ether : Ethyl acetate = 5 : 1). White solids, 97% yield, 38.8 mg.

**<sup>1</sup>H NMR** (400 MHz, CDCl<sub>3</sub>) δ 7.33 (d, J = 8.0 Hz, 2H), 7.12 (d, J = 8.1 Hz, 2H), 6.69 (dd, J = 17.5, 10.9 Hz, 1H), 5.71 (d, J = 17.6 Hz, 1H), 5.21 (d, J = 11.0 Hz, 1H), 3.13 (dd, J = 13.9, 4.3 Hz, 1H), 2.34 (q, J = 7.4, 6.9 Hz, 2H), 2.16 – 2.04 (m, 2H), 2.00 – 1.91 (m, 1H), 1.79 – 1.68 (m, 1H), 1.62 – 1.48 (m, 2H).

**<sup>13</sup>C NMR** (101 MHz, CDCl<sub>3</sub>) δ 220.27, 139.71, 136.54, 135.61, 129.11, 126.29, 113.29, 50.99, 38.25, 35.31, 29.12, 20.57.

**HRMS** (EI-TOF) calcd for C<sub>14</sub>H<sub>16</sub>O: 200.1201; Found : 200.1206.

NMR spectroscopic data agreed with literature values.<sup>31</sup>

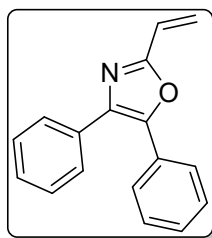

#### 4,5-diphenyl-2-vinyloxazole (5g)

Reaction performed according to condition 1; purified by chromatography on silica gel (Petroleum ether : Ethyl acetate = 5 : 1). White solids, 81% yield, 40.0 mg.

**<sup>1</sup>H NMR** (400 MHz, CDCl<sub>3</sub>) δ 7.65 (dd, J = 12.9, 8.1 Hz, 4H), 7.36 (q, J = 8.1, 7.3 Hz, 6H), 6.68 (dd, J = 17.6, 11.3 Hz, 1H), 6.29 (d, J = 17.6 Hz, 1H), 5.69 (d, J = 11.3 Hz, 1H).  
**<sup>13</sup>C NMR** (101 MHz, CDCl<sub>3</sub>) δ 159.51, 145.30, 136.50, 132.39, 128.83, 128.70, 128.62, 128.25, 128.03, 126.65, 123.37, 121.92.

**HRMS** (EI-TOF) calcd for C<sub>14</sub>H<sub>16</sub>O: 247.0997; Found : 247.1003.

NMR spectroscopic data agreed with literature values.<sup>31</sup>

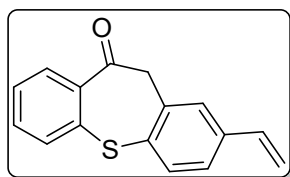

#### 2-vinyldibenzo[b,f]thiepin-10(11H)-one (5h)

Reaction performed according to condition 1; purified by chromatography on silica gel (Petroleum ether : Ethyl acetate = 10 : 1). White solids, 73% yield, 36.8 mg.

**<sup>1</sup>H NMR** (400 MHz, CDCl<sub>3</sub>) δ 8.22 (d, J = 8.0 Hz, 1H), 7.68 – 7.58 (m, 2H), 7.51 (s, 1H), 7.45 (t, J = 7.6 Hz, 1H), 7.34 (t, J = 7.6 Hz, 1H), 7.29 – 7.23 (m, 1H), 6.71 (dd, J = 17.6, 10.9 Hz, 1H), 5.81 (d, J = 17.5 Hz, 1H), 5.34 (d, J = 10.9 Hz, 1H), 4.39 (s, 2H).

**<sup>13</sup>C NMR** (101 MHz, CDCl<sub>3</sub>) δ 191.47, 140.29, 139.45, 137.82, 136.13, 135.60, 133.63, 132.52, 131.56, 131.42, 130.80, 127.01, 126.83, 124.99, 115.56, 51.03.

**HRMS** (EI-TOF) calcd for C<sub>16</sub>H<sub>12</sub>OS: 252.0609; Found : 252.0611.

NMR spectroscopic data agreed with literature values.<sup>31</sup>

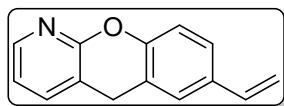

#### 7-vinyl-5H-chromeno[2,3-b]pyridine (5i)

Reaction performed according to condition 1; purified by chromatography on silica gel (Petroleum ether : Ethyl acetate = 10 : 1). Yellow solids, 83% yield, 34.7 mg.

**<sup>1</sup>H NMR** (400 MHz, CDCl<sub>3</sub>) δ 8.16 (d, J = 5.1 Hz, 1H), 7.52 (d, J = 7.4 Hz, 1H), 7.27 (d, J = 11.0 Hz, 1H), 7.18 (s, 1H), 7.10 (d, J = 8.4 Hz, 1H), 7.06 – 6.96 (m, 1H), 6.64 (dd, J = 17.6, 10.9 Hz, 1H), 5.65 (d, J = 17.5 Hz, 1H), 5.19 (d, J = 10.9 Hz, 1H), 4.08 (s, 2H).

**<sup>13</sup>C NMR** (101 MHz, CDCl<sub>3</sub>) δ 158.30, 151.25, 146.65, 138.47, 135.85, 133.39, 126.41, 125.87, 119.87, 119.37, 117.30, 115.31, 113.02, 28.03.

**HRMS** (EI-TOF) calcd for C<sub>14</sub>H<sub>11</sub>NO: 209.0841; Found : 209.0840.

## Biarylation Products of Aryl Carboxylic Acids

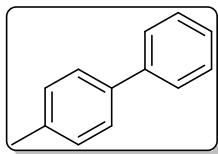

### 4-methyl-1,1'-biphenyl (8a)

Reaction performed according to condition 2; purified by chromatography on silica gel (Petroleum ether). White solid, 68% yield, 22.9 mg.

**<sup>1</sup>H NMR** (400 MHz, CDCl<sub>3</sub>) δ 7.75 (d, *J* = 7.9 Hz, 2H), 7.67 (d, *J* = 8.1 Hz, 2H), 7.58 (t, *J* = 7.6 Hz, 2H), 7.48 (t, *J* = 7.4 Hz, 1H), 7.41 (d, *J* = 8.0 Hz, 2H), 2.56 (s, 3H).

**<sup>13</sup>C NMR** (101 MHz, CDCl<sub>3</sub>) δ 141.32, 138.52, 137.15, 129.66, 128.89, 127.15 (d, *J* = 2.5 Hz), 21.27.

**HRMS** (EI-TOF) calcd for C<sub>13</sub>H<sub>12</sub>: 168.0939; Found : 168.0940.

NMR spectroscopic data agreed with literature values.<sup>33</sup>

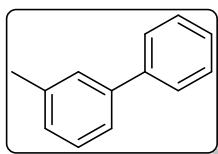

### 3-methyl-1,1'-biphenyl (8b)

Reaction performed according to condition 2; purified by chromatography on silica gel (Petroleum ether). White solid, 64% yield, 21.5 mg.

**<sup>1</sup>H NMR** (400 MHz, CDCl<sub>3</sub>) δ 7.85 (d, *J* = 7.7 Hz, 2H), 7.68 (t, *J* = 7.6 Hz, 4H), 7.58 (t, *J* = 7.6 Hz, 2H), 7.42 (d, *J* = 7.5 Hz, 1H), 2.67 (s, 3H).

**<sup>13</sup>C NMR** (101 MHz, CDCl<sub>3</sub>) δ 141.64, 141.51, 138.54, 128.97 (d, *J* = 1.7 Hz), 128.29, 128.24, 127.45, 124.57, 21.81.

**HRMS** (EI-TOF) calcd for C<sub>13</sub>H<sub>12</sub>: 168.0939; Found : 168.0940.

NMR spectroscopic data agreed with literature values.<sup>33</sup>

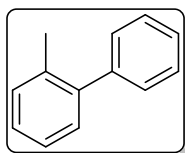

### 2-methyl-1,1'-biphenyl (8c)

Reaction performed according to condition 2; purified by chromatography on silica gel (Petroleum ether). White solid, 58% yield, 19.5 mg.

**<sup>1</sup>H NMR** (400 MHz, CDCl<sub>3</sub>) δ 8.19 – 8.14 (m, 2H), 7.96 (dd, *J* = 16.7, 9.5 Hz, 4H), 7.87 (t, *J* = 7.6 Hz, 2H), 7.70 (d, *J* = 7.7 Hz, 1H), 2.94 (s, 3H).

$^{13}\text{C}$  NMR (101 MHz,  $\text{CDCl}_3$ )  $\delta$  142.00, 141.86, 138.79, 129.35, 128.67, 128.56, 127.79, 124.95, 22.10.

HRMS (EI-TOF) calcd for  $\text{C}_{13}\text{H}_{12}$ : 168.0939; Found : 168.0940.

NMR spectroscopic data agreed with literature values.<sup>33</sup>

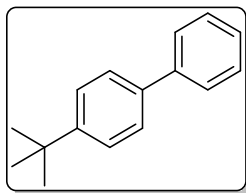

#### 4-(tert-butyl)-1,1'-biphenyl (8d)

Reaction performed according to condition 2; purified by chromatography on silica gel (Petroleum ether). White solid, 62% yield, 26.1 mg.

$^1\text{H}$  NMR (400 MHz,  $\text{CDCl}_3$ )  $\delta$  7.68 (d,  $J = 7.4$  Hz, 2H), 7.63 (d,  $J = 8.4$  Hz, 2H), 7.56 (d,  $J = 8.4$  Hz, 2H), 7.51 (t,  $J = 7.6$  Hz, 2H), 7.40 (t,  $J = 7.4$  Hz, 1H), 1.46 (s, 9H).

$^{13}\text{C}$  NMR (101 MHz,  $\text{CDCl}_3$ )  $\delta$  150.31, 141.14, 138.40, 128.77, 127.10, 127.06, 126.87, 125.79, 34.60, 31.46.

HRMS (EI-TOF) calcd for  $\text{C}_{16}\text{H}_{18}$ : 210.1409; Found : 210.1419.

NMR spectroscopic data agreed with literature values.<sup>33</sup>

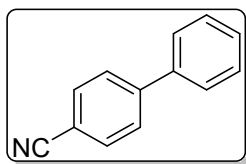

#### [1,1'-biphenyl]-4-carbonitrile (8e)

Reaction performed according to condition 2; purified by chromatography on silica gel (Petroleum ether : Ethyl acetate = 10 : 1). White solid, 45% yield, 16.1 mg.

$^1\text{H}$  NMR (400 MHz,  $\text{CDCl}_3$ )  $\delta$  7.74 (q,  $J = 8.4$  Hz, 4H), 7.62 (d,  $J = 7.3$  Hz, 2H), 7.51 (t,  $J = 7.4$  Hz, 2H), 7.45 (t,  $J = 7.2$  Hz, 1H).

$^{13}\text{C}$  NMR (101 MHz,  $\text{CDCl}_3$ )  $\delta$  145.71, 139.20, 132.62, 129.14, 128.68, 127.76, 127.25, 118.97, 110.93.

HRMS (EI-TOF) calcd for  $\text{C}_{13}\text{H}_9\text{N}$ : 179.0735; Found : 179.0739.

NMR spectroscopic data agreed with literature values.<sup>33</sup>

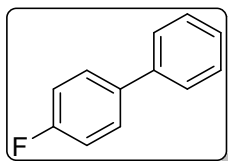

#### 4-fluoro-1,1'-biphenyl (8f)

Reaction performed according to condition 2; purified by chromatography on silica gel (Petroleum ether : Ethyl acetate = 20 : 1). White solid, 63% yield, 21.7 mg.

**<sup>1</sup>H NMR** (400 MHz, CDCl<sub>3</sub>) δ 7.62 – 7.56 (m, 4H), 7.48 (t, *J* = 7.6 Hz, 2H), 7.39 (t, *J* = 7.3 Hz, 1H), 7.17 (t, *J* = 8.7 Hz, 2H).

**<sup>13</sup>C NMR** (101 MHz, CDCl<sub>3</sub>) δ 162.54 (d, *J* = 246.3 Hz), 128.89, 128.75 (d, *J* = 8.0 Hz), 127.32, 127.09, 115.67 (d, *J* = 21.1 Hz).

**<sup>19</sup>F NMR** (377 MHz, CDCl<sub>3</sub>) δ -115.72.

**HRMS** (EI-TOF) calcd for C<sub>12</sub>H<sub>9</sub>F: 172.0688; Found : 172.0690.

NMR spectroscopic data agreed with literature values.<sup>34</sup>

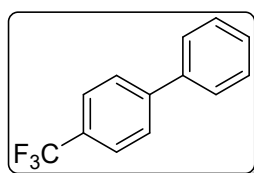

#### 4-(trifluoromethyl)-1,1'-biphenyl (8g)

Reaction performed according to condition 2; purified by chromatography on silica gel (Petroleum ether : Ethyl acetate = 20 : 1). White solid, 70% yield, 31.1 mg.

**<sup>1</sup>H NMR** (400 MHz, CDCl<sub>3</sub>) δ 7.74 (s, 4H), 7.66 – 7.62 (m, 2H), 7.52 (t, *J* = 7.3 Hz, 2H), 7.48 – 7.43 (m, 1H).

**<sup>13</sup>C NMR** (101 MHz, CDCl<sub>3</sub>) δ 144.76, 139.79, 129.02, 128.22, 127.45, 127.31, 125.74 (q, *J* = 4.0 Hz), 123.01.

**<sup>19</sup>F NMR** (377 MHz, CDCl<sub>3</sub>) δ -62.36.

**HRMS** (EI-TOF) calcd for C<sub>13</sub>H<sub>9</sub>F<sub>3</sub>: 222.0656; Found : 222.0659.

NMR spectroscopic data agreed with literature values.<sup>33</sup>

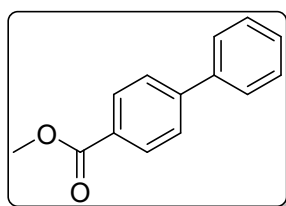

#### methyl [1,1'-biphenyl]-4-carboxylate (8h)

Reaction performed according to condition 2; purified by chromatography on silica gel (Petroleum ether : Ethyl acetate = 10 : 1). White solid, 66% yield, 28.0 mg.

**<sup>1</sup>H NMR** (400 MHz, CDCl<sub>3</sub>) δ 8.14 (d, *J* = 8.4 Hz, 2H), 7.67 (dd, *J* = 14.9, 7.9 Hz, 4H), 7.50 (t, *J* = 7.5 Hz, 2H), 7.42 (t, *J* = 7.3 Hz, 1H), 3.97 (s, 3H).

**<sup>13</sup>C NMR** (101 MHz, CDCl<sub>3</sub>) δ 167.03, 145.66, 140.02, 130.12, 128.95, 128.16, 127.30, 127.07, 52.16.

**HRMS** (EI-TOF) calcd for C<sub>14</sub>H<sub>12</sub>O<sub>2</sub>: 212.0837; Found : 212.0842.

NMR spectroscopic data agreed with literature values.<sup>34</sup>

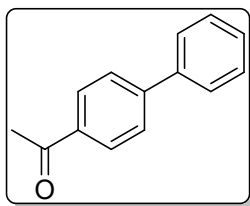

#### 1-([1,1'-biphenyl]-4-yl)ethan-1-one (8i)

Reaction performed according to condition 2; purified by chromatography on silica gel (Petroleum ether : Ethyl acetate = 10 : 1). White solid, 75% yield, 29.4 mg.

**<sup>1</sup>H NMR** (400 MHz, CDCl<sub>3</sub>) δ 8.06 (d, *J* = 8.5 Hz, 2H), 7.72 (d, *J* = 8.5 Hz, 2H), 7.66 (d, *J* = 7.0 Hz, 2H), 7.50 (d, *J* = 14.8 Hz, 2H), 7.43 (t, *J* = 7.3 Hz, 1H), 2.67 (s, 3H).

**<sup>13</sup>C NMR** (101 MHz, CDCl<sub>3</sub>) δ 197.80, 145.81, 139.90, 135.87, 128.98, 128.94, 128.26, 127.30, 127.25, 26.71.

**HRMS** (EI-TOF) calcd for C<sub>14</sub>H<sub>12</sub>O: 196.0888; Found : 196.0892.

NMR spectroscopic data agreed with literature values.<sup>35</sup>

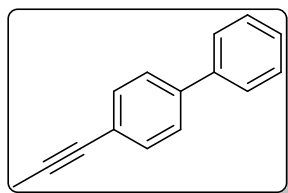

#### 4-(prop-1-yn-1-yl)-1,1'-biphenyl (8j)

Reaction performed according to condition 2; purified by chromatography on silica gel (Petroleum ether : Ethyl acetate = 10 : 1). White solid, 21% yield, 8.1 mg.

**<sup>1</sup>H NMR** (400 MHz, CDCl<sub>3</sub>) δ 7.66 – 7.57 (m, 6H), 7.49 (t, *J* = 7.5 Hz, 2H), 7.41 (t, *J* = 7.3 Hz, 1H), 3.18 (s, 1H).

**<sup>13</sup>C NMR** (101 MHz, CDCl<sub>3</sub>) δ 141.61, 140.28, 132.60, 128.92, 127.78, 127.10, 127.05, 121.01, 83.60.

**HRMS** (EI-TOF) calcd for C<sub>15</sub>H<sub>12</sub>: 192.0939; Found : 192.0944.

NMR spectroscopic data agreed with literature values.<sup>36</sup>

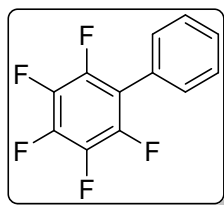

#### 2,3,4,5,6-pentafluoro-1,1'-biphenyl (8k)

Reaction performed according to condition 2; purified by chromatography on silica gel (Petroleum ether : Ethyl acetate = 10 : 1). White solid, 54% yield, 26.4 mg.

**<sup>1</sup>H NMR** (400 MHz, CDCl<sub>3</sub>) δ 7.56 – 7.43 (m, 5H).

**<sup>13</sup>C NMR** (101 MHz, Chloroform-*d*) δ 145.65 – 144.97 (m), 143.15 – 142.61 (m), 141.99 – 141.32 (m), 139.50 – 138.78 (m), 137.06 – 136.22 (m), 130.16, 129.31, 128.74, 126.41, 116.11 – 115.75 (m).

**<sup>19</sup>F NMR** (377 MHz, CDCl<sub>3</sub>) δ -143.26 (dd, *J* = 23.6, 8.3 Hz), -155.62 (t, *J* = 21.5 Hz), -162.26 (td, *J* = 22.2, 7.6 Hz).

**HRMS** (EI-TOF) calcd for C<sub>12</sub>H<sub>5</sub>F<sub>5</sub>: 244.0311; Found : 244.0315.

NMR spectroscopic data agreed with literature values.<sup>37</sup>

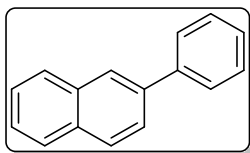

### 2-phenylnaphthalene (8l)

Reaction performed according to condition 2; purified by chromatography on silica gel (Petroleum ether : Ethyl acetate = 20 : 1). White solid, 87% yield, 35.5 mg.

**<sup>1</sup>H NMR** (400 MHz, CDCl<sub>3</sub>) δ 8.13 (s, 1H), 8.02 – 7.91 (m, 3H), 7.88 – 7.77 (m, 3H), 7.64 – 7.52 (m, 4H), 7.50 – 7.38 (m, 1H).

**<sup>13</sup>C NMR** (101 MHz, CDCl<sub>3</sub>) δ 141.23, 138.66, 133.80, 132.73, 128.98, 128.54, 128.33, 127.77, 127.55, 127.47, 126.41, 126.05, 125.92, 125.71.

**HRMS** (EI-TOF) calcd for C<sub>16</sub>H<sub>12</sub>: 204.0939; Found : 204.0945.

NMR spectroscopic data agreed with literature values.<sup>33</sup>

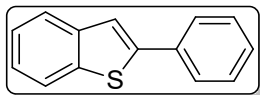

### 2-phenylbenzo[b]thiophene (8m)

Reaction performed according to condition 2; purified by chromatography on silica gel (Petroleum ether : Ethyl acetate = 10 : 1). White solid, 70% yield, 29.4 mg.

**<sup>1</sup>H NMR** (400 MHz, CDCl<sub>3</sub>) δ 7.87 (d, *J* = 7.7 Hz, 1H), 7.81 (d, *J* = 7.5 Hz, 1H), 7.75 (d, *J* = 7.6 Hz, 2H), 7.58 (s, 1H), 7.46 (t, *J* = 7.6 Hz, 2H), 7.42 – 7.32 (m, 3H).

**<sup>13</sup>C NMR** (101 MHz, CDCl<sub>3</sub>) δ 144.27, 140.71, 139.52, 134.32, 128.98, 128.30, 126.52, 124.54, 124.34, 123.59, 122.30, 119.48.

**HRMS** (EI-TOF) calcd for C<sub>14</sub>H<sub>10</sub>S: 210.0503; Found : 210.0504.

NMR spectroscopic data agreed with literature values.<sup>38</sup>

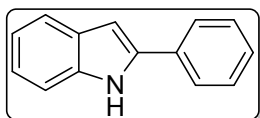



### 2-phenyl-1*H*-indole (8n)

Reaction performed according to condition 2; purified by chromatography on silica gel (Petroleum ether : Ethyl acetate = 3 : 1). White solid, 64% yield, 24.7 mg.

**<sup>1</sup>H NMR** (400 MHz, DMSO)  $\delta$  11.55 (s, 1H), 7.88 (d,  $J = 7.1$  Hz, 2H), 7.54 (d,  $J = 7.1$  Hz, 1H), 7.52 – 7.37 (m, 3H), 7.32 (t,  $J = 7.4$  Hz, 1H), 7.14 – 7.08 (m, 1H), 7.05 – 6.97 (m, 1H), 6.91 (d,  $J = 1.5$  Hz, 1H).

**<sup>13</sup>C NMR** (101 MHz, DMSO)  $\delta$  137.61, 137.13, 132.22, 128.90, 128.63, 127.39, 124.98, 121.57, 120.04, 119.37, 111.31, 98.67.

**HRMS** (EI-TOF) calcd for C<sub>14</sub>H<sub>11</sub>N: 193.0891; Found : 193.0899.

NMR spectroscopic data agreed with literature values.<sup>38</sup>

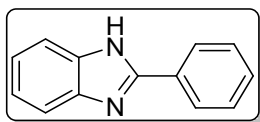

### 2-phenyl-1*H*-benzo[d]imidazole (8o)

Reaction performed according to condition 2; purified by chromatography on silica gel (Petroleum ether : Ethyl acetate = 1 : 1). White solid, 49% yield, 19.0 mg.

**<sup>1</sup>H NMR** (400 MHz, DMSO)  $\delta$  8.18 (d,  $J = 7.0$  Hz, 2H), 7.67 – 7.43 (m, 5H), 7.21 (dd,  $J = 6.1, 3.2$  Hz, 2H).

**<sup>13</sup>C NMR** (101 MHz, DMSO)  $\delta$  156.42, 135.37, 135.07, 134.18, 131.65, 127.32.

**HRMS** (EI-TOF) calcd for C<sub>13</sub>H<sub>10</sub>N<sub>2</sub>: 194.0844; Found : 194.0846.

NMR spectroscopic data agreed with literature values.<sup>40</sup>

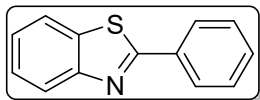

### 2-phenylbenzo[d]thiazole (8p)

Reaction performed according to condition 2; purified by chromatography on silica gel (Petroleum ether : Ethyl acetate = 3 : 1). White solid, 62% yield, 26.1 mg.

**<sup>1</sup>H NMR** (400 MHz, CDCl<sub>3</sub>)  $\delta$  8.19 – 8.00 (m, 3H), 7.91 (d,  $J = 8.0$  Hz, 1H), 7.55 – 7.47 (m, 4H), 7.39 (td,  $J = 7.7, 7.3, 1.3$  Hz, 1H).

**<sup>13</sup>C NMR** (101 MHz, CDCl<sub>3</sub>)  $\delta$  168.13, 154.09, 135.05, 133.59, 131.04, 129.06, 127.61, 126.37, 125.24, 123.24, 121.66.

**HRMS** (EI-TOF) calcd for C<sub>13</sub>H<sub>9</sub>NS: 211.0456; Found : 211.0457.

NMR spectroscopic data agreed with literature values.<sup>40</sup>

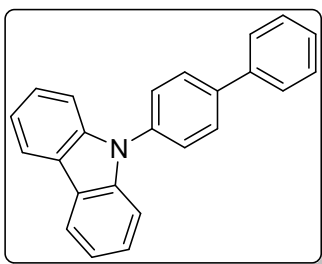

**9-([1,1'-biphenyl]-4-yl)-9H-carbazole (8q)**

Reaction performed according to condition 2; purified by chromatography on silica gel (Petroleum ether : Ethyl acetate = 10 : 1). White solid, 67% yield, 42.8 mg.

**<sup>1</sup>H NMR** (400 MHz, CDCl<sub>3</sub>) δ 8.19 (d, *J* = 7.8 Hz, 2H), 7.84 (d, *J* = 8.5 Hz, 2H), 7.74 – 7.70 (m, 2H), 7.66 (d, *J* = 8.5 Hz, 2H), 7.56 – 7.49 (m, 4H), 7.49 – 7.41 (m, 3H), 7.36 – 7.30 (m, 2H).

**<sup>13</sup>C NMR** (101 MHz, CDCl<sub>3</sub>) δ 140.91, 140.33, 136.91, 129.01, 128.55, 127.69, 127.37, 127.19, 126.02, 123.48, 120.38, 120.02, 109.89.

**HRMS** (EI-TOF) calcd for C<sub>24</sub>H<sub>17</sub>N: 319.1361; Found : 319.1366.

NMR spectroscopic data agreed with literature values.<sup>41</sup>

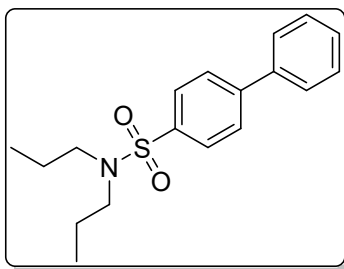

***N,N*-dipropyl-[1,1'-biphenyl]-4-sulfonamide (8r)**

Reaction performed according to condition 2; purified by chromatography on silica gel (Petroleum ether : Ethyl acetate = 5 : 1). White solid, 58% yield, 36.8 mg.

**<sup>1</sup>H NMR** (400 MHz, CDCl<sub>3</sub>) δ 7.89 (d, *J* = 8.5 Hz, 2H), 7.73 (d, *J* = 8.5 Hz, 2H), 7.64 (d, *J* = 8.6 Hz, 2H), 7.50 (t, *J* = 7.4 Hz, 2H), 7.44 (t, *J* = 7.3 Hz, 1H), 3.16 – 3.12 (m, 4H), 1.63 – 1.57 (m, 4H), 0.92 (t, *J* = 7.4 Hz, 6H).

**<sup>13</sup>C NMR** (101 MHz, CDCl<sub>3</sub>) δ 145.09, 139.42, 138.76, 129.04, 128.39, 127.58, 127.30, 50.13, 22.11, 11.23.

**HRMS** (EI-TOF) calcd for C<sub>18</sub>H<sub>23</sub>NO<sub>2</sub>S: 317.1449; Found : 317.1455.

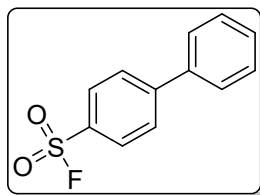

### [1,1'-biphenyl]-4-sulfonyl fluoride (8s)

Reaction performed according to condition 2; purified by chromatography on silica gel (Petroleum ether : Ethyl acetate = 10 : 1). White solid, 61% yield, 28.8 mg.

**<sup>1</sup>H NMR** (400 MHz, CDCl<sub>3</sub>) δ 8.08 (d, *J* = 8.5 Hz, 2H), 7.82 (d, *J* = 8.3 Hz, 2H), 7.64 (dd, *J* = 8.2, 1.7 Hz, 2H), 7.57 – 7.46 (m, 3H).

**<sup>13</sup>C NMR** (101 MHz, CDCl<sub>3</sub>) δ 148.66, 138.51, 129.31, 129.26, 129.02, 128.22, 127.48.

**<sup>19</sup>F NMR** (377 MHz, CDCl<sub>3</sub>) δ 66.61.

**HRMS** (EI-TOF) calcd for C<sub>12</sub>H<sub>9</sub>FO<sub>2</sub>S: 236.0307; Found : 236.0309.

NMR spectroscopic data agreed with literature values.<sup>42</sup>

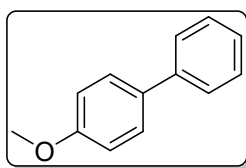

### 4-methoxy-1,1'-biphenyl (8t)

Reaction performed according to condition 2; purified by chromatography on silica gel (Petroleum ether : Ethyl acetate = 10 : 1). White solid, 77% yield, 28.3 mg.

**<sup>1</sup>H NMR** (400 MHz, CDCl<sub>3</sub>) δ 7.57 (t, *J* = 8.3 Hz, 4H), 7.45 (t, *J* = 7.6 Hz, 2H), 7.33 (t, *J* = 7.4 Hz, 1H), 7.01 (d, *J* = 8.8 Hz, 2H), 3.88 (s, 3H).

**<sup>13</sup>C NMR** (101 MHz, CDCl<sub>3</sub>) δ 159.15, 140.84, 133.79, 128.74, 128.18, 126.76, 126.67, 114.21, 55.37.

**HRMS** (EI-TOF) calcd for C<sub>13</sub>H<sub>12</sub>O: 184.0888; Found : 184.0889.

NMR spectroscopic data agreed with literature values.<sup>33</sup>

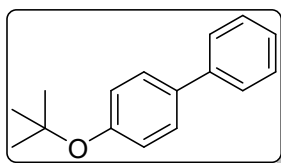

### 4-(tert-butoxy)-1,1'-biphenyl (8u)

Reaction performed according to condition 2; purified by chromatography on silica gel (Petroleum ether : Ethyl acetate = 10 : 1). White solid, 42% yield, 19.0 mg.

**<sup>1</sup>H NMR** (400 MHz, CDCl<sub>3</sub>) δ 7.60 (d, *J* = 7.1 Hz, 2H), 7.52 (d, *J* = 8.6 Hz, 2H), 7.44 (t, *J* = 7.6 Hz, 2H), 7.34 (t, *J* = 7.4 Hz, 1H), 7.08 (d, *J* = 8.6 Hz, 2H), 1.41 (s, 9H).

**<sup>13</sup>C NMR** (101 MHz, CDCl<sub>3</sub>) δ 154.94, 140.81, 136.20, 128.71, 127.53, 126.88, 126.85, 124.35, 28.91.

**HRMS** (EI-TOF) calcd for C<sub>16</sub>H<sub>18</sub>O: 226.1358; Found : 226.1359.

NMR spectroscopic data agreed with literature values.<sup>43</sup>

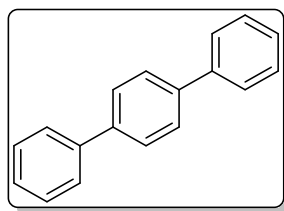

### 1,1':4',1''-terphenyl (8v)

Reaction performed according to condition 2; purified by chromatography on silica gel (Petroleum ether : Ethyl acetate = 20 : 1). White solid, 45% yield, 20.7 mg.

**<sup>1</sup>H NMR** (400 MHz, DMSO)  $\delta$  7.72 – 7.64 (m, 8H), 7.48 (t,  $J$  = 7.6 Hz, 4H), 7.37 (d,  $J$  = 7.3 Hz, 2H).

**<sup>13</sup>C NMR** (101 MHz, DMSO)  $\delta$  140.70, 140.13, 128.83, 127.51, 127.35, 127.06.

**HRMS** (EI-TOF) calcd for C<sub>18</sub>H<sub>14</sub>: 230.1096; Found : 230.1098.

NMR spectroscopic data agreed with literature values.<sup>44</sup>

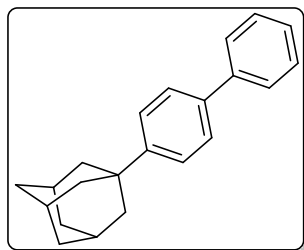

### (3r,5r,7r)-1-([1,1'-biphenyl]-4-yl)adamantane (8w)

Reaction performed according to condition 2; purified by chromatography on silica gel (Petroleum ether : Ethyl acetate = 20 : 1). White solid, 72% yield, 41.5 mg.

**<sup>1</sup>H NMR** (400 MHz, CDCl<sub>3</sub>)  $\delta$  7.65 – 7.58 (m, 4H), 7.50 – 7.43 (m, 4H), 7.35 (t,  $J$  = 7.4 Hz, 1H), 2.16 (s, 3H), 2.00 (d,  $J$  = 3.3 Hz, 6H), 1.87 – 1.78 (m, 6H).

**<sup>13</sup>C NMR** (101 MHz, CDCl<sub>3</sub>)  $\delta$  150.53, 141.13, 138.38, 128.70, 127.06, 126.97, 126.85, 43.22, 36.83, 36.09, 28.98.

**HRMS** (EI-TOF) calcd for C<sub>22</sub>H<sub>24</sub>: 288.1878; Found : 288.1880.

NMR spectroscopic data agreed with literature values.<sup>45</sup>

## Other Products

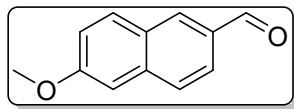

### 6-methoxy-2-naphthaldehyde (9a)

React according to the appropriate conditions in the synthetic application; purified by chromatography on silica gel (Petroleum ether : Ethyl acetate = 10 : 1). Yellow solid, 62% yield, 34.6 mg.

**<sup>1</sup>H NMR** (400 MHz, CDCl<sub>3</sub>) δ 10.11 (s, 1H), 8.26 (s, 1H), 7.92 (dd, J = 14.3, 8.8 Hz, 2H), 7.82 (d, J = 8.5 Hz, 1H), 7.25 (dd, J = 8.4, 3.1 Hz, 1H), 7.19 (d, J = 2.9 Hz, 1H), 3.98 (s, 3H).

**<sup>13</sup>C NMR** (101 MHz, CDCl<sub>3</sub>) δ 144.07, 136.73, 135.08, 128.05, 126.20, 112.87, 28.64, 15.61.

**HRMS** (EI-TOF) calcd for C<sub>12</sub>H<sub>10</sub>O<sub>2</sub>: 186.0681; Found : 186.0680.

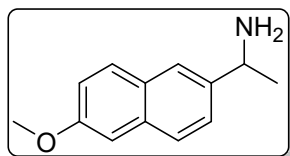

### 1-(6-methoxynaphthalen-2-yl)ethan-1-amine (9b)

React according to the appropriate conditions in the synthetic application; purified by chromatography on silica gel (Petroleum ether : Ethyl acetate = 3 : 1). Yellow solid, 80% yield, 96.5 mg.

**<sup>1</sup>H NMR** (400 MHz, DMSO-d<sub>6</sub>) δ 8.72 (s, 2H), 7.95 (s, 1H), 7.88 (d, J = 8.6 Hz, 1H), 7.82 (d, J = 9.0 Hz, 1H), 7.67 (d, J = 8.6 Hz, 1H), 7.35 (s, 1H), 7.21 (dd, J = 8.9, 2.6 Hz, 1H), 3.88 (s, 3H), 1.61 (d, J = 6.9 Hz, 3H).

**<sup>13</sup>C NMR** (101 MHz, DMSO-d<sub>6</sub>) δ 158.09, 134.86, 134.50, 129.85, 128.45, 127.71, 126.18, 125.60, 119.63, 106.29, 55.71, 50.54, 21.10.

**HRMS** (EI-TOF) calcd for C<sub>13</sub>H<sub>15</sub>NO: 201.1154; Found : 201.1150.

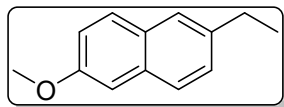

### 2-ethyl-6-methoxynaphthalene (9c)

React according to the appropriate conditions in the synthetic application; purified by chromatography on silica gel (Petroleum ether : Ethyl acetate = 10 : 1). White solid, 74% yield, 68.9 mg.

**<sup>1</sup>H NMR** (400 MHz, CDCl<sub>3</sub>) δ 7.76 – 7.68 (m, 2H), 7.59 (s, 1H), 7.35 (d, J = 8.4 Hz, 1H), 7.16 (d, J = 7.9 Hz, 2H), 3.95 (s, 3H), 2.82 (q, J = 7.6 Hz, 2H), 1.35 (t, J = 7.6 Hz, 3H).

$^{13}\text{C}$  NMR (101 MHz,  $\text{CDCl}_3$ )  $\delta$  157.09, 139.48, 132.91, 129.19, 128.92, 127.57, 126.71, 125.44, 118.61, 105.68, 55.30, 28.86, 15.65.

HRMS (EI-TOF) calcd for  $\text{C}_{13}\text{H}_{14}\text{O}$ : 186.1045; Found : 186.1049.

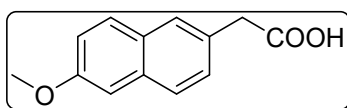

### 2-(6-methoxynaphthalen-2-yl)acetic acid (9d)

React according to the appropriate conditions in the synthetic application; purified by chromatography on silica gel (Petroleum ether : Ethyl acetate = 1 : 1). Yellow solid, 47% yield, 20.3 mg.

$^1\text{H}$  NMR (400 MHz,  $\text{DMSO-d}_6$ )  $\delta$  7.77 (dd,  $J = 8.7, 4.7$  Hz, 2H), 7.69 (s, 1H), 7.38 (d,  $J = 8.5$  Hz, 1H), 7.30 (d,  $J = 2.8$  Hz, 1H), 7.15 (dd,  $J = 8.9, 2.6$  Hz, 1H), 3.87 (s, 3H), 3.69 (s, 2H).

$^{13}\text{C}$  NMR (101 MHz,  $\text{DMSO-d}_6$ )  $\delta$  173.41, 157.51, 133.53, 130.87, 129.41, 128.85, 127.96, 127.03, 119.08, 55.60, 41.33.

HRMS (EI-TOF) calcd for  $\text{C}_{13}\text{H}_{12}\text{O}_3$ : 216.0786; Found : 216.0780.

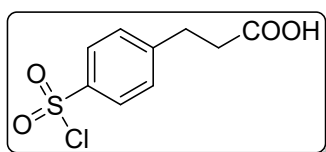

### 3-(4-(chlorosulfonyl)phenyl)propanoic acid (9e)

React according to the appropriate conditions in the synthetic application; purified by chromatography on silica gel (Petroleum ether : Ethyl acetate = 1 : 1). Yellow solid, 33% yield, 12.8 g.

$^1\text{H}$  NMR (400 MHz,  $\text{CDCl}_3$ )  $\delta$  8.00 (d,  $J = 8.5$  Hz, 2H), 7.50 (d,  $J = 8.5$  Hz, 2H), 3.11 (t,  $J = 7.5$  Hz, 2H), 2.78 (t,  $J = 7.5$  Hz, 2H).

$^{13}\text{C}$  NMR (101 MHz,  $\text{CDCl}_3$ )  $\delta$  176.78, 148.58, 142.59, 129.67, 127.39, 34.37, 30.41.

HRMS (EI-TOF) calcd for  $\text{C}_9\text{H}_9\text{ClO}_4\text{S}$ : 247.9910; Found : 247.9918.

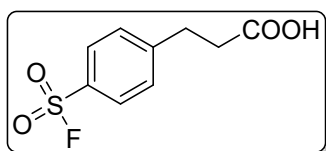

### 3-(4-(fluorosulfonyl)phenyl)propanoic acid (9f)

React according to the appropriate conditions in the synthetic application; purified by chromatography on silica gel (Petroleum ether : Ethyl acetate = 1 : 1). Black solid, 92% yield, 3.6 g.

$^1\text{H}$  NMR (400 MHz,  $\text{CDCl}_3$ )  $\delta$  7.96 (d,  $J = 8.3$  Hz, 2H), 7.50 (d,  $J = 8.3$  Hz, 2H), 3.10 (t,  $J = 7.5$  Hz, 2H), 2.76 (t,  $J = 7.4$  Hz, 2H).

**<sup>13</sup>C NMR** (101 MHz, CDCl<sub>3</sub>) δ 177.61, 148.95, 131.24, 130.99, 129.68, 128.79, 34.63, 30.48.

**<sup>19</sup>F NMR** (377 MHz, CDCl<sub>3</sub>) δ 66.16.

**HRMS** (EI-TOF) calcd for C<sub>9</sub>H<sub>9</sub>FO<sub>4</sub>S: 232.0206; Found : 232.0209.

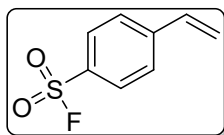

#### 4-vinylbenzenesulfonyl fluoride (9g)

React according to the appropriate conditions in the synthetic application; purified by chromatography on silica gel (Petroleum ether : Ethyl acetate = 10 : 1). Yellow oil, 78% yield, 12.8 g.

**<sup>1</sup>H NMR** (400 MHz, CDCl<sub>3</sub>) δ 7.96 (d, J = 8.4 Hz, 2H), 7.62 (d, J = 8.4 Hz, 2H), 6.78 (dd, J = 17.6, 10.9 Hz, 1H), 5.97 (d, J = 17.5 Hz, 1H), 5.54 (d, J = 10.9 Hz, 1H).

**<sup>13</sup>C NMR** (101 MHz, CDCl<sub>3</sub>) δ 144.77, 134.84, 131.63, 128.85, 127.15, 119.36.

**<sup>19</sup>F NMR** (377 MHz, CDCl<sub>3</sub>) δ 66.31.

**HRMS** (EI-TOF) calcd for C<sub>8</sub>H<sub>7</sub>FO<sub>2</sub>S: 186.0151; Found : 186.0150.

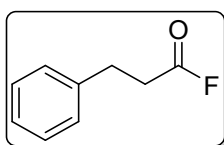

#### 3-phenylpropanoyl fluoride (10a)

React according to the appropriate conditions in the possible intermediates; purified by chromatography on silica gel (Petroleum ether : Ethyl acetate = 10 : 1). Yellow oil.

**<sup>1</sup>H NMR** (400 MHz, CDCl<sub>3</sub>) δ 7.33 (q, J = 8.1 Hz, 2H), 7.23 (q, J = 7.5, 6.7 Hz, 3H), 2.99 (dt, J = 14.4, 7.7 Hz, 2H), 2.80 (dt, J = 33.3, 7.6 Hz, 2H).

**<sup>19</sup>F NMR** (377 MHz, CDCl<sub>3</sub>) δ 45.39.

**HRMS** (EI-TOF) calcd for C<sub>9</sub>H<sub>9</sub>FO: 152.0637; Found : 152.0644.

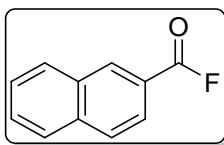

#### 2-naphthoyl fluoride (10b)

React according to the appropriate conditions in the possible intermediates; purified by chromatography on silica gel (Petroleum ether : Ethyl acetate = 10 : 1). White solid.

**<sup>1</sup>H NMR** (400 MHz, CDCl<sub>3</sub>) δ 8.65 (s, 1H), 7.98 (dt, J = 24.9, 8.5 Hz, 4H), 7.71 (t, J = 7.6 Hz, 1H), 7.63 (t, J = 7.5 Hz, 1H).

**<sup>13</sup>C NMR** (101 MHz, CDCl<sub>3</sub>) δ 159.38, 155.97, 136.45, 134.04 (d, J = 3.4 Hz), 132.29, 129.69 (d, J = 5.9 Hz), 129.07, 127.98, 127.40, 125.62 (d, J = 4.2 Hz), 122.31, 121.71.

**$^{19}\text{F}$  NMR** (377 MHz,  $\text{CDCl}_3$ )  $\delta$  18.08.

**HRMS** (EI-TOF) calcd for  $\text{C}_{11}\text{H}_7\text{FO}$ : 174.0481; Found : 174.0483.



### III. Reference

- 1 B. Xiong, X. Zeng, S. Geng, S. Chen, Y. He, Z. Feng, Thiyl radical promoted chemo- and regioselective oxidation of C[double bond, length as m-dash]C bonds using molecular oxygen via iron catalysis, *Green. Chem.*, 2018, **20**, 4521-4527.
- 2 Y. Yang, N. I. Wong, P. Teo, Formal Intermolecular Hydroamination of Unbiased Olefins for Primary Amine Formation, *Eur. J. Org. Chem.*, 2015, **2015**, 1207-1210.
- 3 D. Gartner, A. Welther, B. R. Rad, R. Wolf, A. Jacobi von Wangelin, Heteroatom-Free Arene-Cobalt and Arene-Iron Catalysts for Hydrogenations, *Angew. Chem., Int. Ed.*, 2014, **53**, 3722-3726.
- 4 P. F. Yuan, Z. Yang, S. S. Zhang, C. M. Zhu, X. L. Yang, Q. Y. Meng, Deconstructive Carboxylation of Activated Alkenes with Carbon Dioxide, *Angew. Chem., Int. Ed.*, 2024, **63**, e202313030.
- 5 F. Yokokawa, K. Hung, Y. Liu, O. Simon, L. Zhang, P. Lu, B. K. S. Yeung, C. Sarko, Synthesis of a Potent Pan-Serotype Dengue Virus Inhibitor Having a Tetrahydrothienopyridine Core, *Synlett*, 2020, **33**, 464-467.
- 6 J. J. Dong, L. Krasnova, M. G. Finn, K. B. Sharpless, Sulfur(VI) Fluoride Exchange (SuFEx): Another Good Reaction for Click Chemistry, *Angew. Chem., Int. Ed.*, 2014, **53**, 9430-9448.
- 7 H. Zhu, D. Chen, N. Li, Q. Xu, H. Li, J. He, H. Wang, P. Wu, J. Lu, Fabrication of Photocontrolled Surfaces for Oil/Water Separation through Sulfur(VI) Fluoride Exchange, *Chemistry*, 2017, **23**, 14712-14717.
- 8 T. Kurita, K. Hattori, S. Seki, T. Mizumoto, F. Aoki, Y. Yamada, K. Ikawa, T. Maegawa, Y. Monguchi, H. Sajiki, Efficient and Convenient Heterogeneous Palladium-Catalyzed Regioselective Deuteration at the Benzylic Position, *Chemistry*, 2008, **14**, 664-673.
- 9 Gaussian 16, Revision C.01, M. J. Frisch, G. W. Trucks, H. B. Schlegel, G. E. Scuseria, M. A. Robb, J. R. Cheeseman, G. Scalmani, V. Barone, G. A. Petersson, H. Nakatsuji, X. Li, M. Caricato, A. V. Marenich, J. Bloino, B. G. Janesko, R. Gomperts, B. Mennucci, H. P. Hratchian, J. V. Ortiz, A. F. Izmaylov, J. L. Sonnenberg, D. Williams-Young, F. Ding, F. Lipparini, F. Egidi, J. Goings, B. Peng, A. Petrone, T. Henderson, D. Ranasinghe, V. G. Zakrzewski, J. Gao, N. Rega, G. Zheng, W. Liang, M. Hada, M. Ehara, K. Toyota, R. Fukuda, J. Hasegawa, M. Ishida, T. Nakajima, Y. Honda, O. Kitao, H. Nakai, T. Vreven, K. Throssell, J. A. Montgomery, Jr., J. E. Peralta, F. Ogliaro, M. J. Bearpark, J. J. Heyd, E. N. Brothers, K. N. Kudin, V. N. Staroverov, T. A. Keith, R. Kobayashi, J. Normand, K. Raghavachari, A. P. Rendell, J. C. Burant, S. S. Iyengar, J. Tomasi, M. Cossi, J. M. Millam, M. Klene, C. Adamo, R. Cammi, J. W. Ochterski, R. L. Martin, K. Morokuma, O. Farkas, J. B. Foresman, and D. J. Fox, Gaussian, Inc., Wallingford CT, 2019.
- 10 (a) Becke, A. D. *J. Chem. Phys.*, 1993, **98**, 5648-5652. (b) Lee, C.; Yang, W.; Parr, R. G. *Phys. Rev. B: Condens. Development of The Colle-Salvetti Correlation-Energy Formula into a Functional of The Electron Density*, *Matter Mater. Phys.*, 1988, **37**, 785-789. (c) Vosko, S. H.; Wilk, L.; Nusair, M.

*Accurate Spin-dependent Electron Liquid Correlation Energies for Local Spin Density Calculations: A Critical Analysis*, *Can. J. Phys.* 1980, **58**, 1200–1211.

11 (a) Hehre, W. J.; Ditchfield, R.; Pople, J. A. Self-Consistent Molecular Orbital Methods. XII. Further Extensions of Gaussian-Type Basis Sets for Use in Molecular Orbital Studies of Organic Molecules, *J. Chem. Phys.*, 1972, **56**, 2257-2261. (b) Hariharan, P. C.; Pople, J. A. *Theor. Chim. Acta*, 1973, **28**, 213-222.

12 (a) Andrae, D.; Häussermann, U.; Dolg, M.; Stoll, H.; Preuss, H. Energy-Adjusted *ab Initio* Pseudopotentials for the Second and Third Row Transition Elements. *Theor. Chim. Acta*, 1990, **77**, 123–141. (b) Roy, L. E.; Hay, P. J.; Martin, R. L. Revised Basis Sets for the LANL Effective Core Potentials. *J. Chem. Theory Comput.*, 2008, **4**, 1029–1031.

13 Grimme, S.; Antony, J.; Ehrlich, S.; Krieg, H. A consistent and accurate *ab initio* parametrization of density functional dispersion correction (DFT-D) for the 94 elements H-Pu, *J. Chem. Phys.*, 2010, **132**, 154104.

14 Marenich, A. V.; Cramer, C. J.; Truhlar, D. G. Universal Solvation Model Based on Solute Electron Density and on a Continuum Model of the Solvent Defined by the Bulk Dielectric Constant and Atomic Surface Tensions, *J. Phys. Chem. B*, 2009, **113**, 6378–6396.

15 (a) Krishnan, R.; Binkley, J. S.; Seeger, R.; Pople, J. A. Self-consistent Molecular Orbital Methods. XX. A Basis Set for Correlated Wave Functions, *J. Chem. Phys.*, 1980, **72**, 650-654. (b) Clark, T.; Chandrasekhar, J.; Spitznagel, G. W.; Schleyer, P. v. R. J. Efficient Diffuse Function-augmented Basis Sets for Anion Calculations. III.† The 3-21+G Basis Set for First-row Elements, Li–F, *Comput. Chem.*, 1983, **4**, 294-301.

16 J. Xiao, Q. Li, R. W. Shen, S. Shimada, and L. B. Han, Phosphonium Phenolate Zwitterion vs Phosphonium Ylide: Synthesis, Characterization and Reactivity Study of a Trimethylphosphonium Phenolate Zwitterion, *Adv. Synth. Catal.*, 2019, **361**, 5715–5720.

17 C. Z. Yao, Q. Q. Li, M. M. Wang, X. S. Ning, and Y. B. Kang, (E)-Specific Direct Julia-olefination of Aryl Alcohols Without Extra Reducing Agents Promoted by Bases, *Chem. Commun.*, 2015, **51**, 7729-7732.

18 A. F. Littke, L. Schwarz, and G. C. Fu, Pd/P(*t*-Bu)<sub>3</sub>: A Mild and General Catalyst for Stille Reactions of Aryl Chlorides and Aryl Bromides, *J. Am. Chem. Soc.*, 2002, **124**, 6343-6348.

19 B. Schmidt, N. Elizarov, R. Berger, and F. Hölder, Scope and Limitations of The Heck–Matsuda-Coupling of Phenol Diazonium Salts and Styrenes: A Protecting-group Economic Synthesis of Phenolic Stilbenes, *Org. Biomol. Chem.*, 2013, **11**, 3674–3691.

20 S. Guo, F. Cong, R. Guo, L. Wang, and P. P. Tang, Asymmetric Silver-catalysed Intermolecular Bromotrifluoromethoxylation of Alkenes with A New Trifluoromethoxylation Reagent, *Nat. Chem.*, 2017, **9**, 546–551.

21 G. A. Molander, and A. R. Brown, Suzuki–Miyaura Cross-Coupling Reactions of Potassium

- Vinyltrifluoroborate with Aryl and Heteroaryl Electrophiles, *J. Org. Chem.*, 2006, **71**, 9681-9686.
- 22 C. R. Smith, T. V. RajanBabu, Low Pressure Vinylation of Aryl and Vinyl Halides via Heck–Mizoroki Reactions Using Ethylene, *Tetrahedron*, 2010, **66**, 1102–1110.
- 23 M. D. Greenhalgh, and S. P. Thomas, Iron-Catalyzed, Highly Regioselective Synthesis of  $\alpha$ -Aryl Carboxylic Acids from Styrene Derivatives and CO<sub>2</sub>, *J. Am. Chem. Soc.*, 2012, **134**, 11900–11903.
- 24 B. Boutevin, E. Fleury, Y. Pietrasanta, and L. Sarraf, Synthèse de Polysiloxanes Fluores. Partie III Addition de Thiols Silicies Sur des Olefines Fluores, *J. Fluor Chem.*, 1986, **31**, 437-450.
- 25 M. Barbasiewicz, M. Bieniek, A. Michrowska, A. Szadkowska, A. Makal, K. Wozniak, and K. Grelaa, Probing of the Ligand Anatomy: Effects of the Chelating Alkoxy Ligand Modifications on the Structure and Catalytic Activity of Ruthenium Carbene Complexes, *Adv. Synth. Catal.*, 2007, **349**, 193–203.
- 26 A. Sar, S. Lindeman, and W. A. Donaldson, De Novo Synthesis of Polyhydroxyl Aminocyclohexanes, *Org. Biomol. Chem.*, 2010, **8**, 3908–3917.
- 27 S. Xu, Y. P. Gao, R. Chen, K. Wang, Y. Zhang, and J. B. Wang, Copper(*i*)-Catalyzed Olefination of *N*-Sulfonylhydrazones with Sulfones, *Chem. Commun.*, 2016, **52**, 4478–4480.
- 28 (Z) J. L. Fiorio, R. V. Goncalves, Erico Teixeira-Neto, Manuel A. Ortuno, Nuria Lopez, and Liane Marcia Rossi, Accessing Frustrated Lewis Pair Chemistry through Robust Gold@N-Doped Carbon for Selective Hydrogenation of Alkynes, *ACS Catal.*, 2018, **8**, 3516–3524; (E) Y. L. Wang, C. Qin, X. Q. Jia, X. B. Leng, and Z. Huang, An Agostic Iridium Pincer Complex as a Highly Efficient and Selective Catalyst for Monoisomerization of 1-Alkenes to trans-2-Alkenes, *Angew. Chem., Int. Ed.*, 2017, **56**, 1614–1618.
- 29 X. X. Xi, T. Q. Chen, J. S. Zhang, and L. B. Han, Efficient and Selective Hydrogenation of C–O Bonds with A Simple Sodium Formate Catalyzed by Nickel, *Chem. Commun.*, 2018, **54**, 1521–1524.
- 30 C. H. Lei, Y. J. Yip, and J. R. Zhou, Nickel-Catalyzed Direct Synthesis of Aryl Olefins from Ketones and Organoboron Reagents under Neutral Conditions, *J. Am. Chem. Soc.*, 2017, **139**, 6086–6089.
- 31 K. Q. Chen, J. Shen, Z. X. Wang, and X. Y. A Donor–acceptor Complex Enables the Synthesis of E-olefins from Alcohols, Amines and Carboxylic Acids, *Chem. Sci.*, 2021, **12**, 6684–6690.
- 32 S. Haubenreisser, T. H. Wçste, C. Martínez, K. Ishihara, and K. Muçiz, Structurally Defined Molecular Hypervalent Iodine Catalysts for Intermolecular Enantioselective Reactions, *Angew. Chem., Int. Ed.*, 2016, **55**, 413–417.
- 33 G. Zhang, C. Guan, Y. Zhao, H. Miao and C. Ding, ‘Awaken’ Aryl Sulfonyl Fluoride: A New Partner in the Suzuki–Miyaura Coupling Reaction, *New J. Chem.*, 2022, **46**, 3560-3564.
- 34 D. Guo, W. Shi and G. Zou, Suzuki Coupling of Activated Aryltriazenes for Practical Synthesis of Biaryls from Anilines, *Adv. Syn. Catal.*, 2022, **364**, 2438-2442.
- 35 S. Sun, J. Song, X. Yuan, Y. Zhang, Z. Shu, C.-X. Xie and X. Jia, A PPh<sub>3</sub> Modified-chitosan Supported Pd Nanocatalyst for Heterogeneous Suzuki–Miyaura Cross Coupling Reactions, *New J. Chem.* 2023, **47**,

7410-7415.

36 A. M. Haydl, L. J. Hilpert and B. Breit, Regioconvergent and Enantioselective Rhodium-Catalyzed Hydroamination of Internal and Terminal Alkynes: A Highly Flexible Access to Chiral Pyrazoles, *Chem.*, 2016, **22**, 6547-6551.

37 H. Tanaka, H. Kuriki, T. Kubo, I. Osaka and H. Yoshida, Copper-Catalyzed Arylstannylation of Alkynes in A Sequence, *Chem. Commun.*, 2019, **55**, 6503-6506.

38 Y. Ji, P. Li, X. Zhang and L. Wang, Trace Amount Cu (ppm)-Catalyzed Intramolecular Cyclization of 2-(Gem-Dibromovinyl)Phenols(Thiophenols) to 2-Bromobenzofurans(thiophenes), *Org. Biomol. Chem.*, 2013, **11**, 4095-4101.

39 Y. Taskesenligil, M. Aslan, T. Cogurcu and N. Saracoglu, Directed C–H Functionalization of C3-Aldehyde, Ketone, and Acid/Ester-Substituted Free (NH) Indoles with Iodoarenes via a Palladium Catalyst System, *J. Org. Chem.*, 2023, **88**, 1299-1318.

40 J. K. Laha and M. K. Hunjan, Diversity in Heterocycle Synthesis Using  $\alpha$ -Iminocarboxylic Acids: Decarboxylation Dichotomy, *J. Org. Chem.* 2022, **87**, 2315-2323.

41 S. Xu, B. Huang, G. Qiao, Z. Huang, Z. Zhang, Z. Li, P. Wang and Z. Zhang, Rh(III)-Catalyzed C–H Activation of Boronic Acid with Aryl Azide, *Org. Lett.*, 2018, **20**, 5578-5582.

42 J. K. Park, J. Oh and S. Lee, Electrochemical Synthesis of Sulfonyl Fluorides from Sulfonyl Hydrazides, *Org. Chem. Fron.*, 2022, **9**, 3407-3413.

43 J. Zhou, B. Jiang, Z. Zhao and N. Shibata, Etherification of Fluoroarenes with Alkoxyboronic Acid Pinacol Esters via C–F Bond Cleavage, *Org. Lett.*, 2022, **24**, 5084-5089.

44 M. Gholinejad, S. Mirmohammadi and J. M. Sansano, Novel Water Dispersible and Magnetically Recoverable Palladium Nano Catalyst for Room-Temperature Suzuki-Miyaura Coupling Reaction, *Chemistryselect*, 2021, **6**, 13906-13917.

45 G. Zhang, X. Luo, C. Guan, Y. Cui and C. Ding, Pd/Ni Co-catalyzed Selective Cross-Coupling of Aryl Bromides and Aryl Fluorosulfonates at Room Temperature, *Eur. J. Org. Chem.*, 2023, **26**.

## IV. Spectroscopic Data

$^1\text{H}$  NMR (400 MHz,  $\text{CDCl}_3$ ) spectrum of 2a

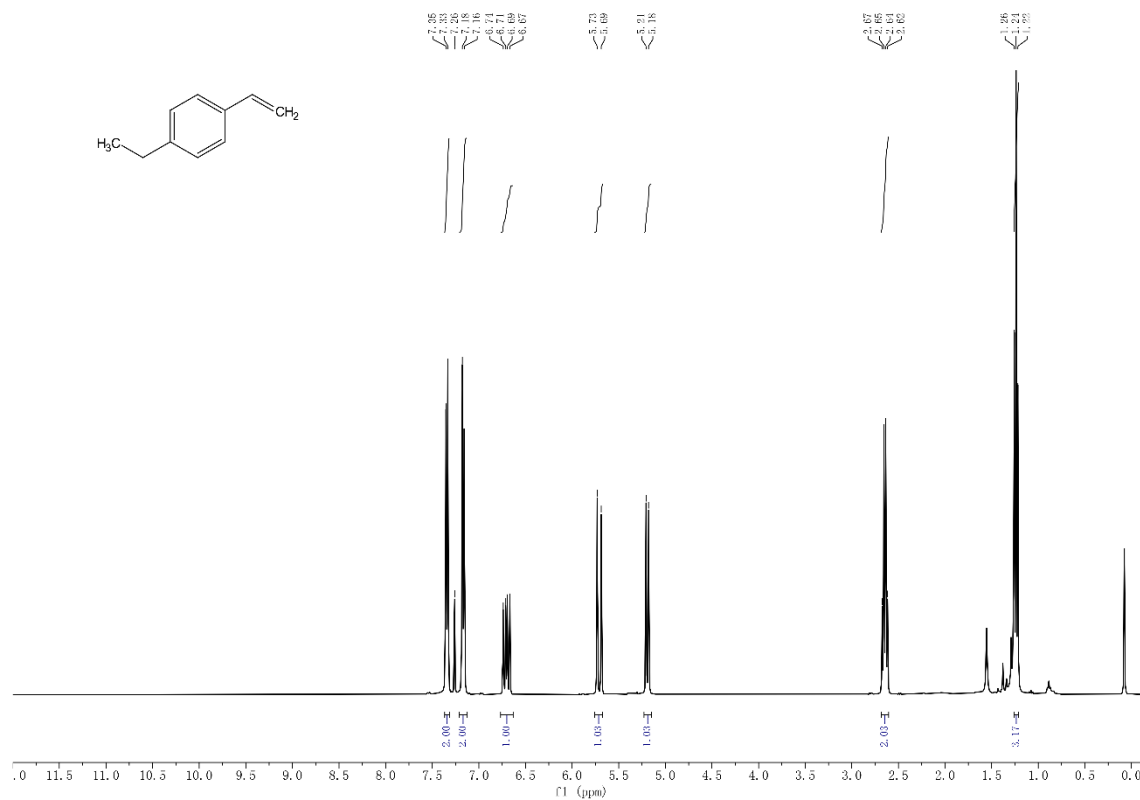

$^{13}\text{C}\{^1\text{H}\}$  NMR (101 MHz,  $\text{CDCl}_3$ ) spectrum of 2a

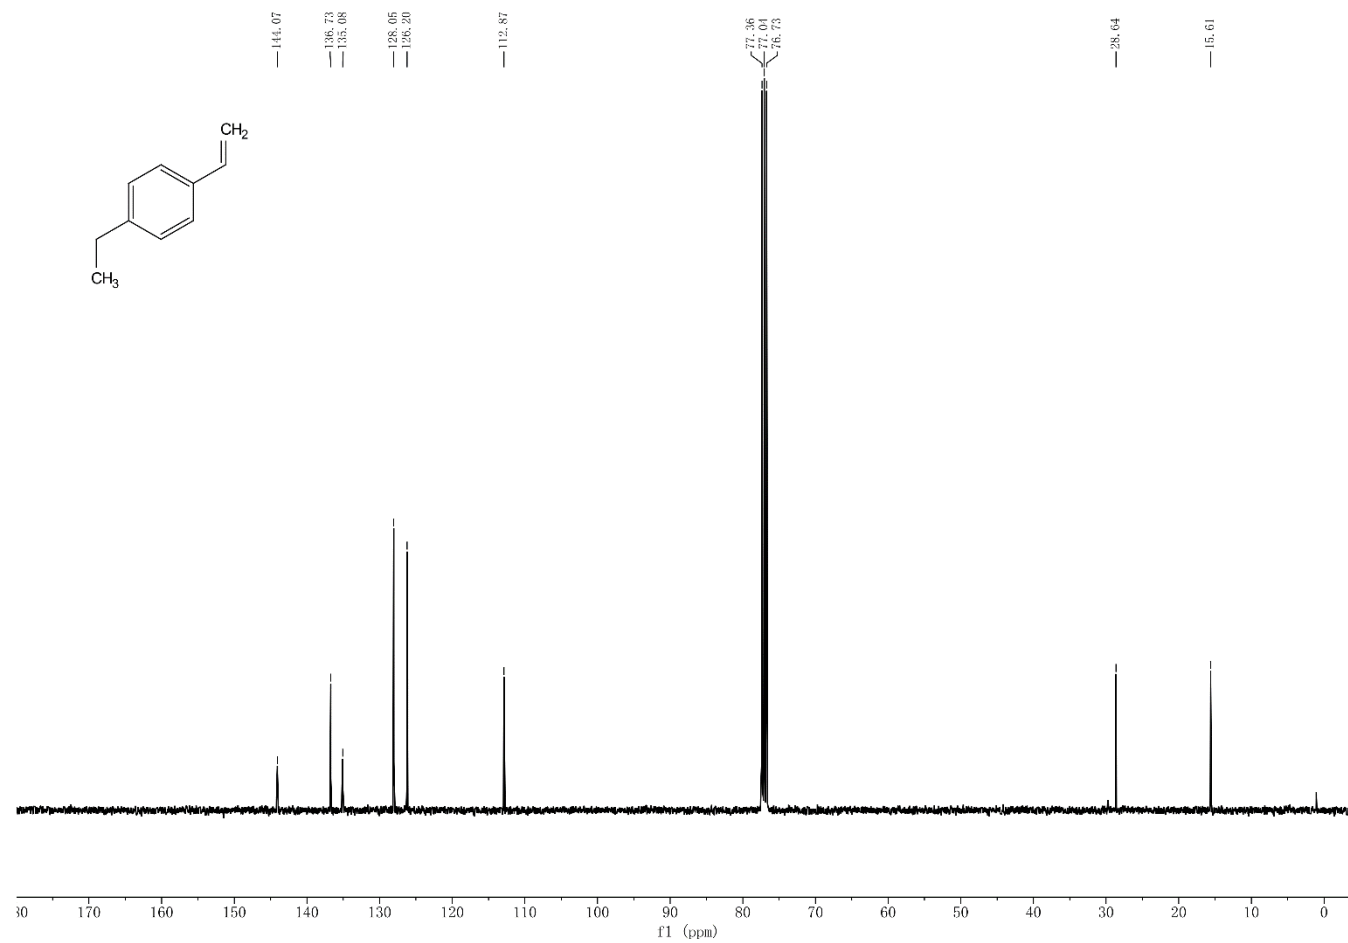

<sup>1</sup>H NMR (400 MHz, CDCl<sub>3</sub>) spectrum of 2b

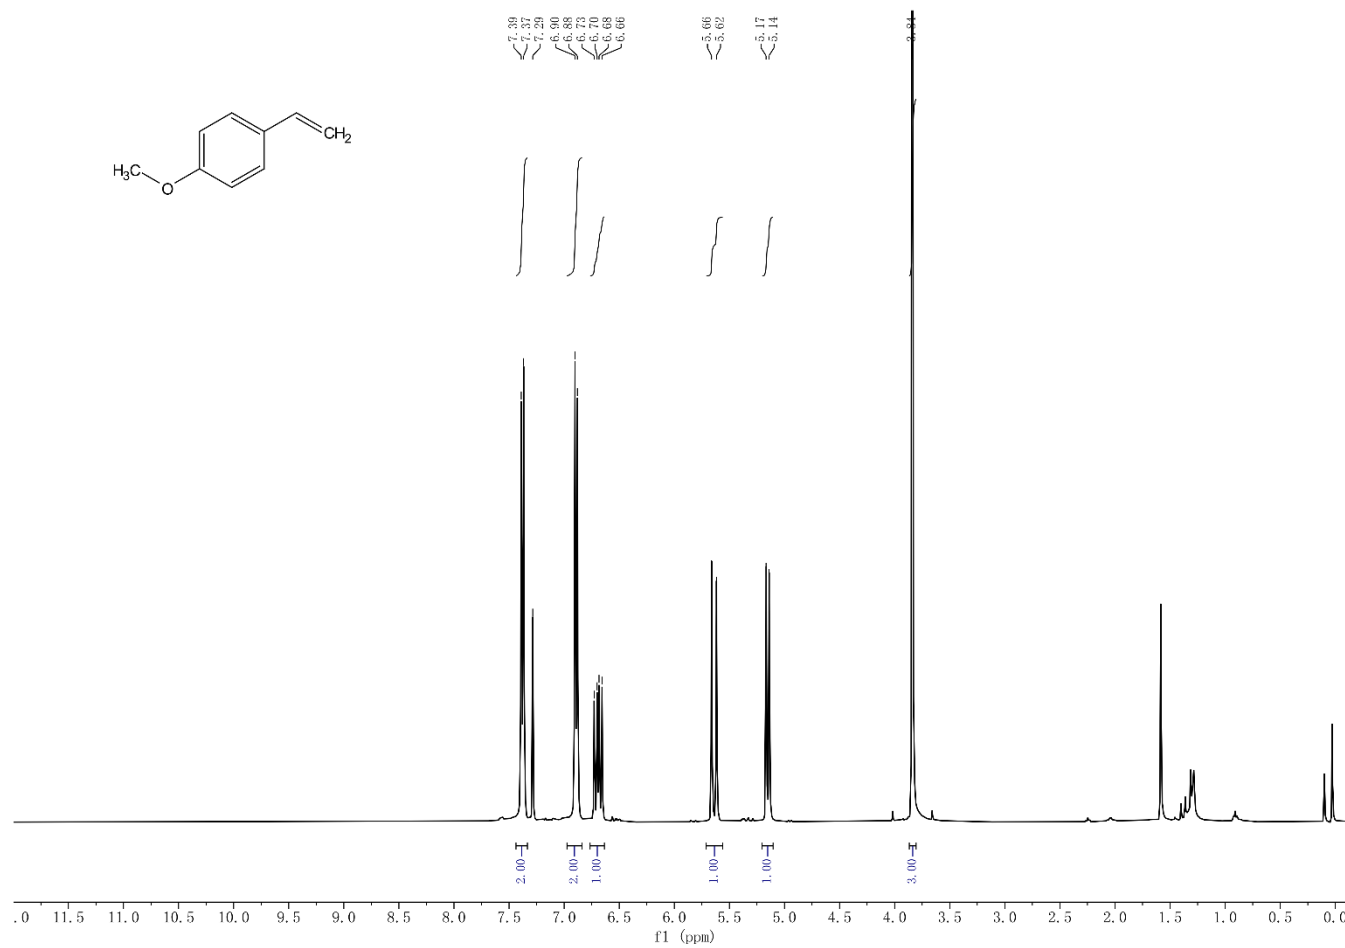

$^{13}\text{C}\{^1\text{H}\}$  NMR (101 MHz,  $\text{CDCl}_3$ ) spectrum of 2b

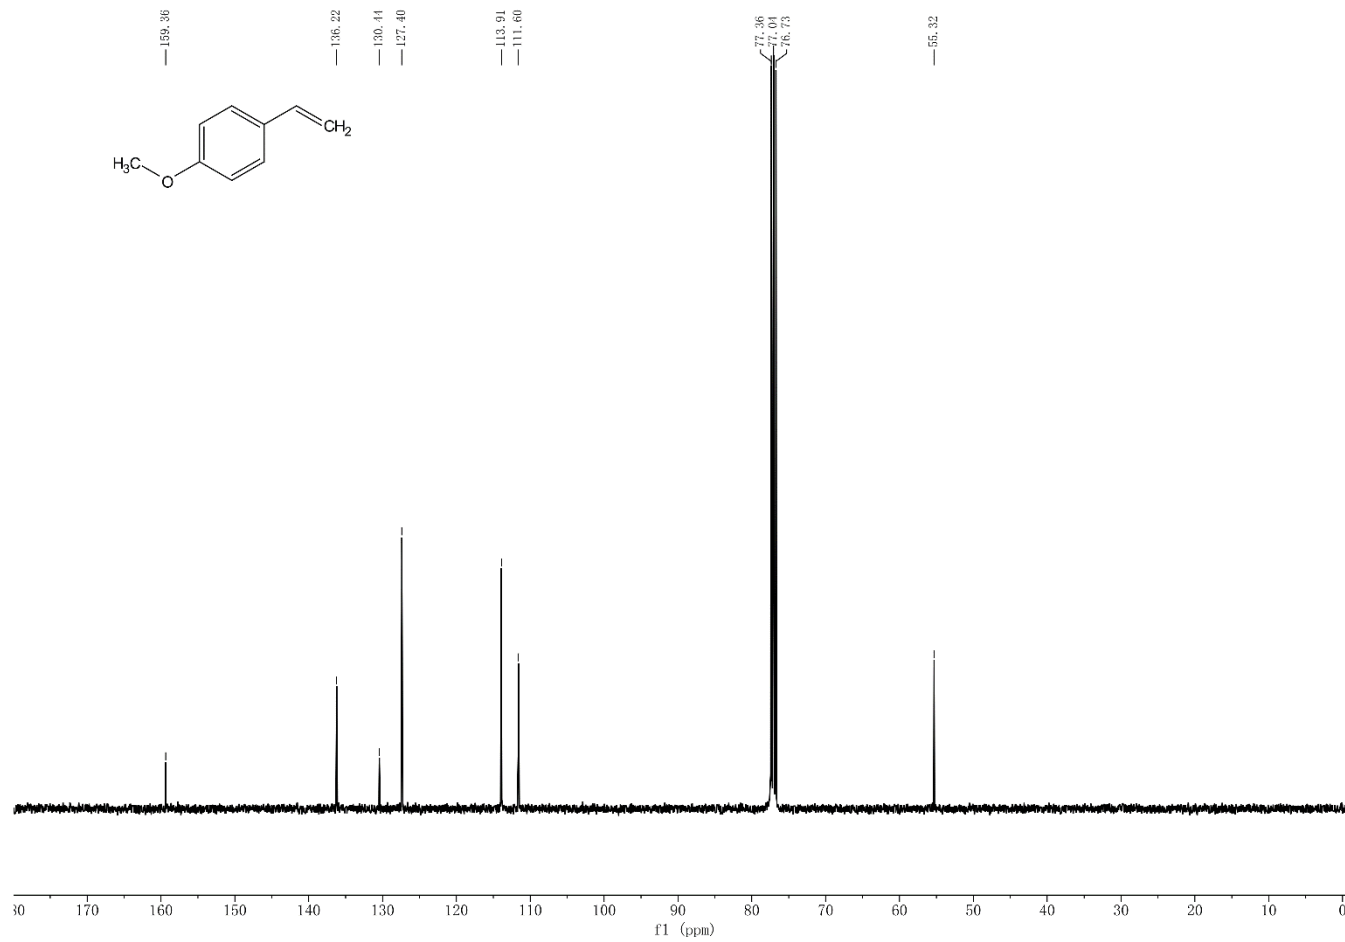



$^1\text{H}$  NMR (400 MHz,  $\text{CDCl}_3$ ) spectrum of 2c

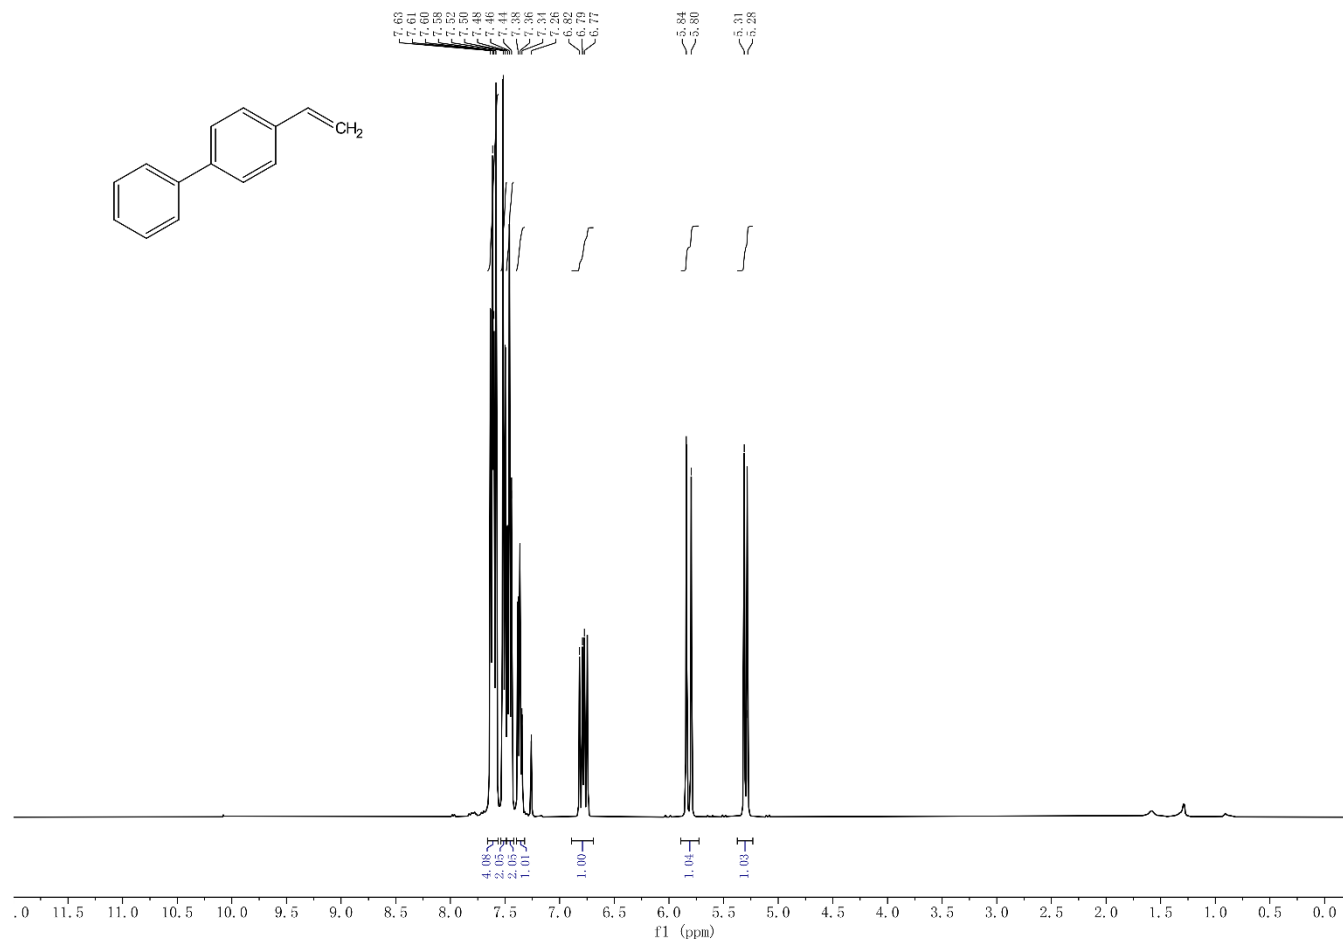

$^{13}\text{C}\{^1\text{H}\}$  NMR (101 MHz,  $\text{CDCl}_3$ ) spectrum of 2c

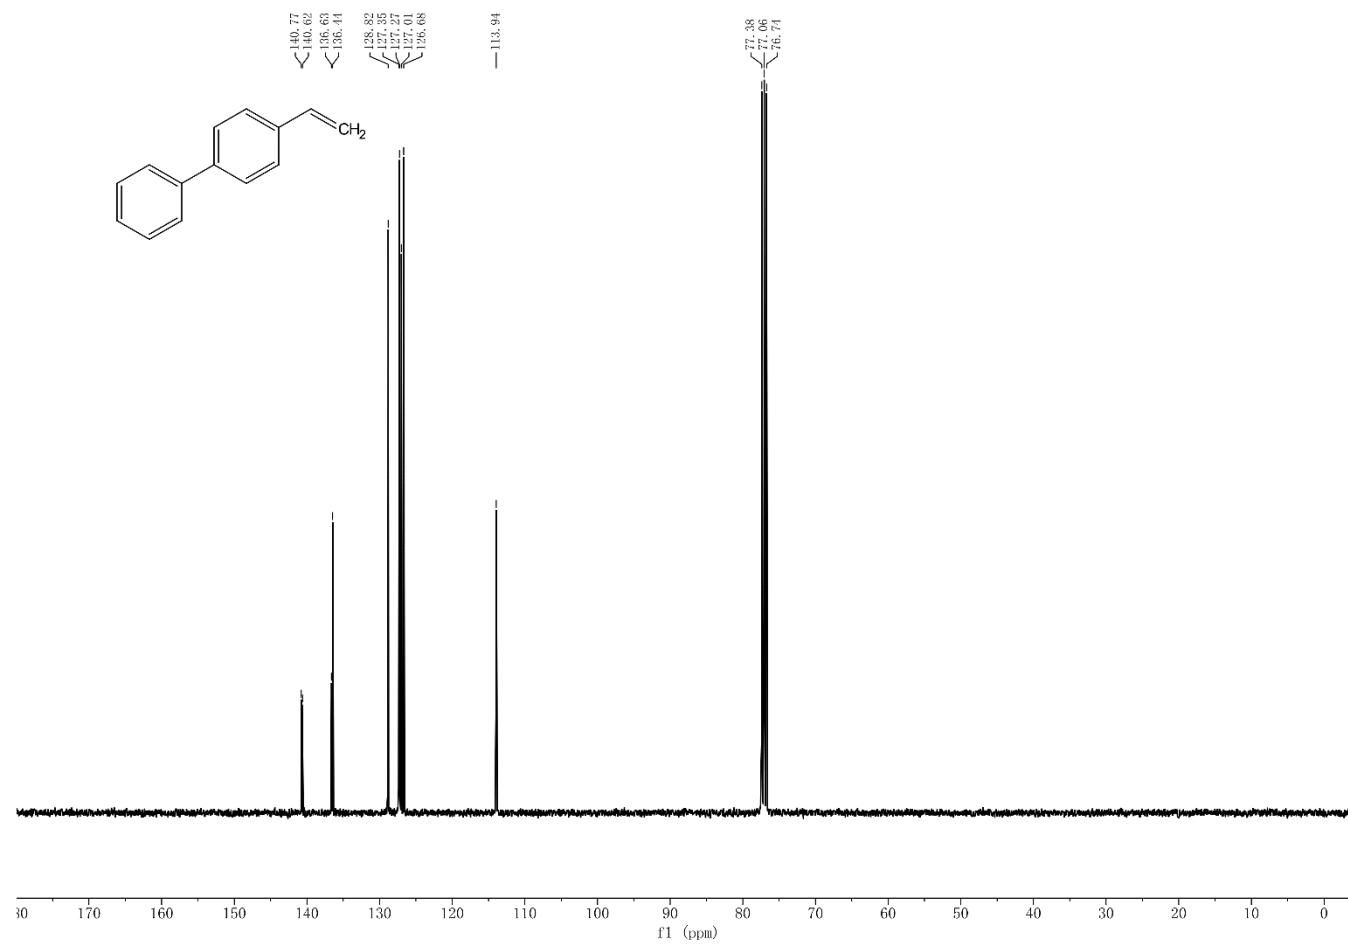

<sup>1</sup>H NMR (400 MHz, CDCl<sub>3</sub>) spectrum of 2d

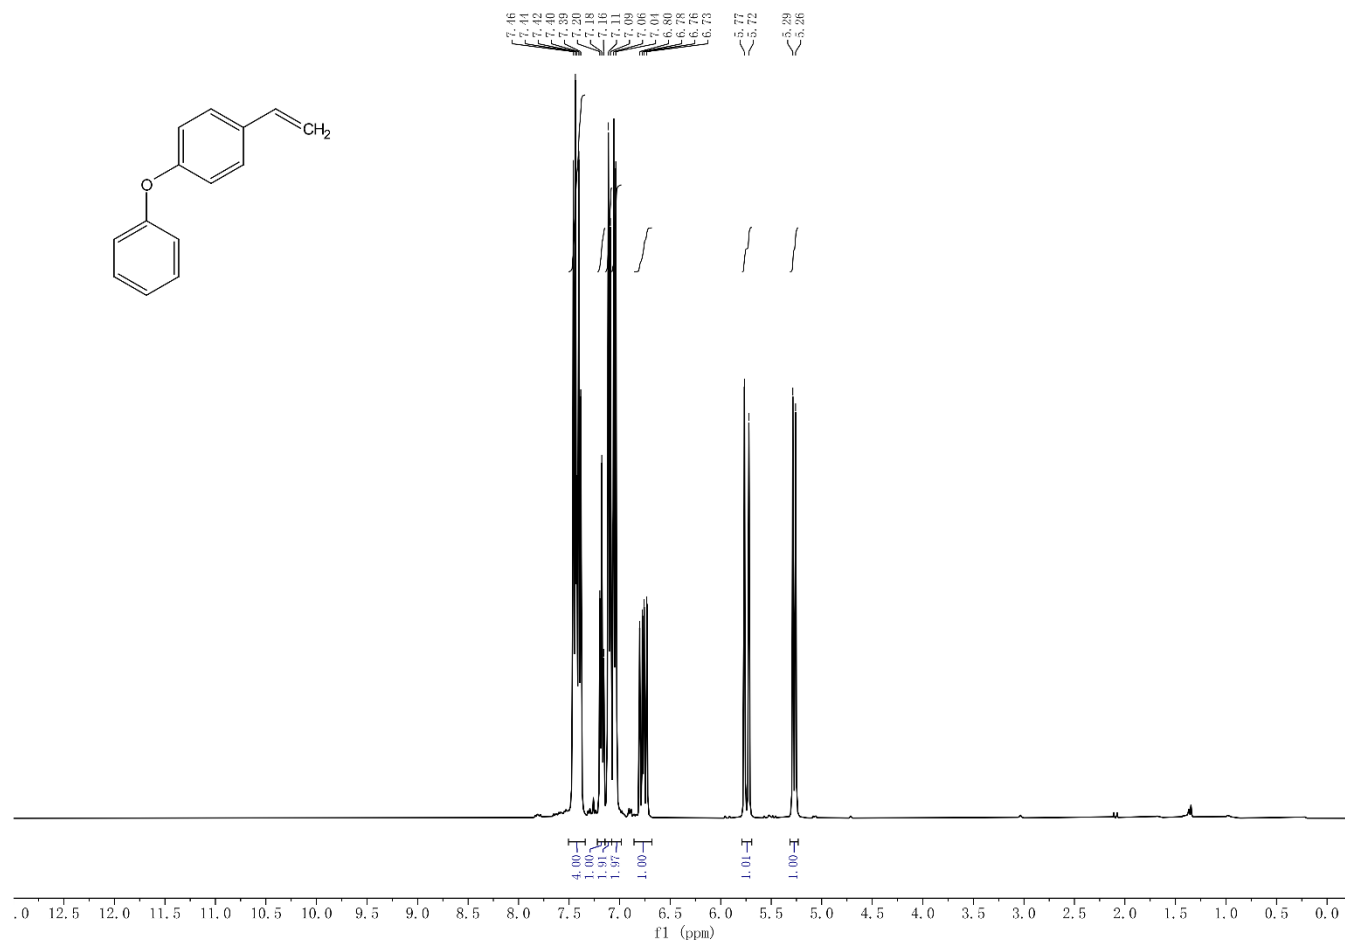

$^{13}\text{C}\{^1\text{H}\}$  NMR (101 MHz,  $\text{CDCl}_3$ ) spectrum of 2d

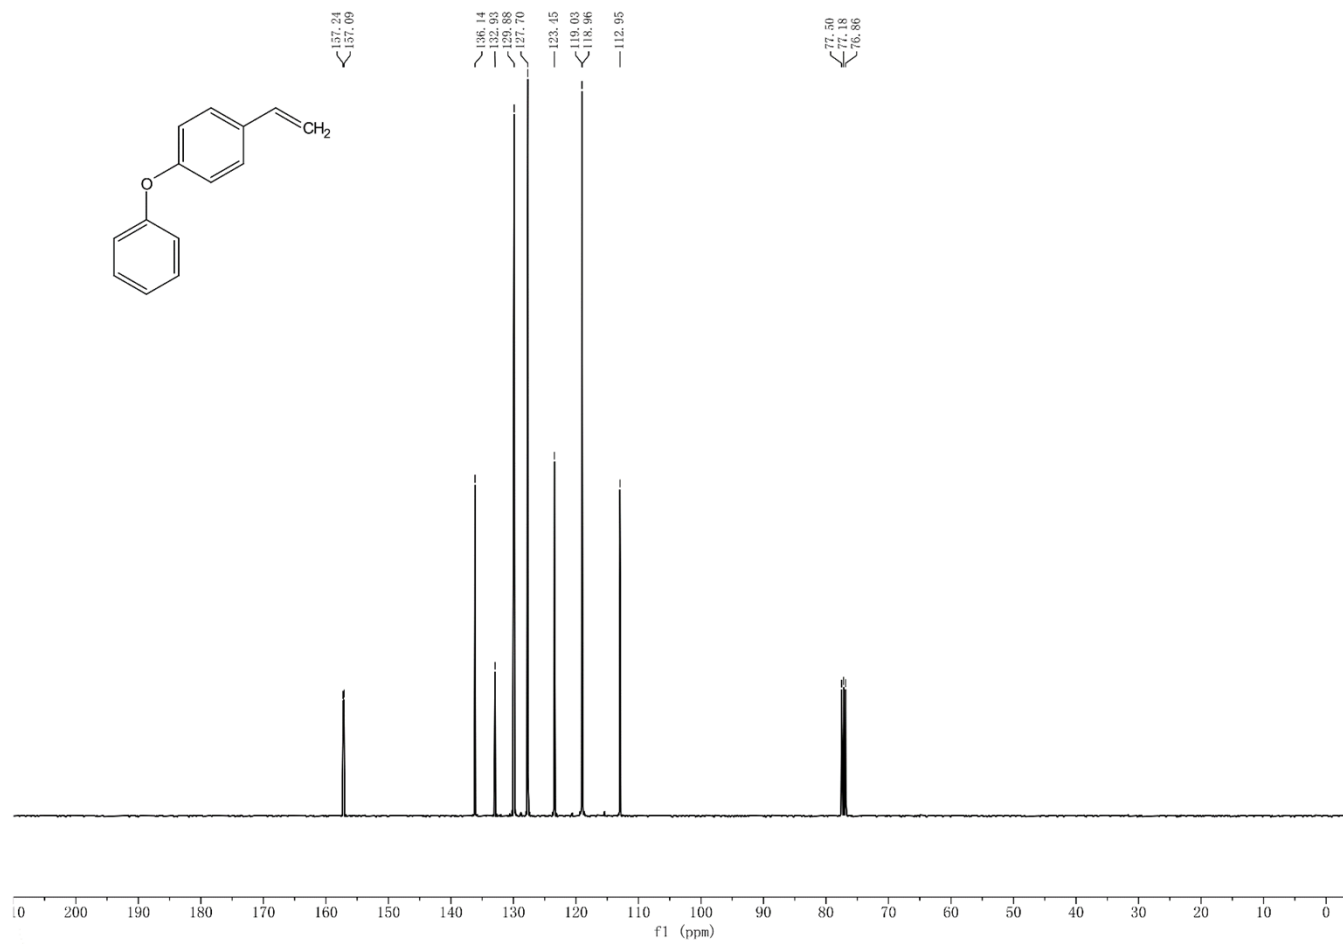

<sup>1</sup>H NMR (400 MHz, CDCl<sub>3</sub>) spectrum of 2e

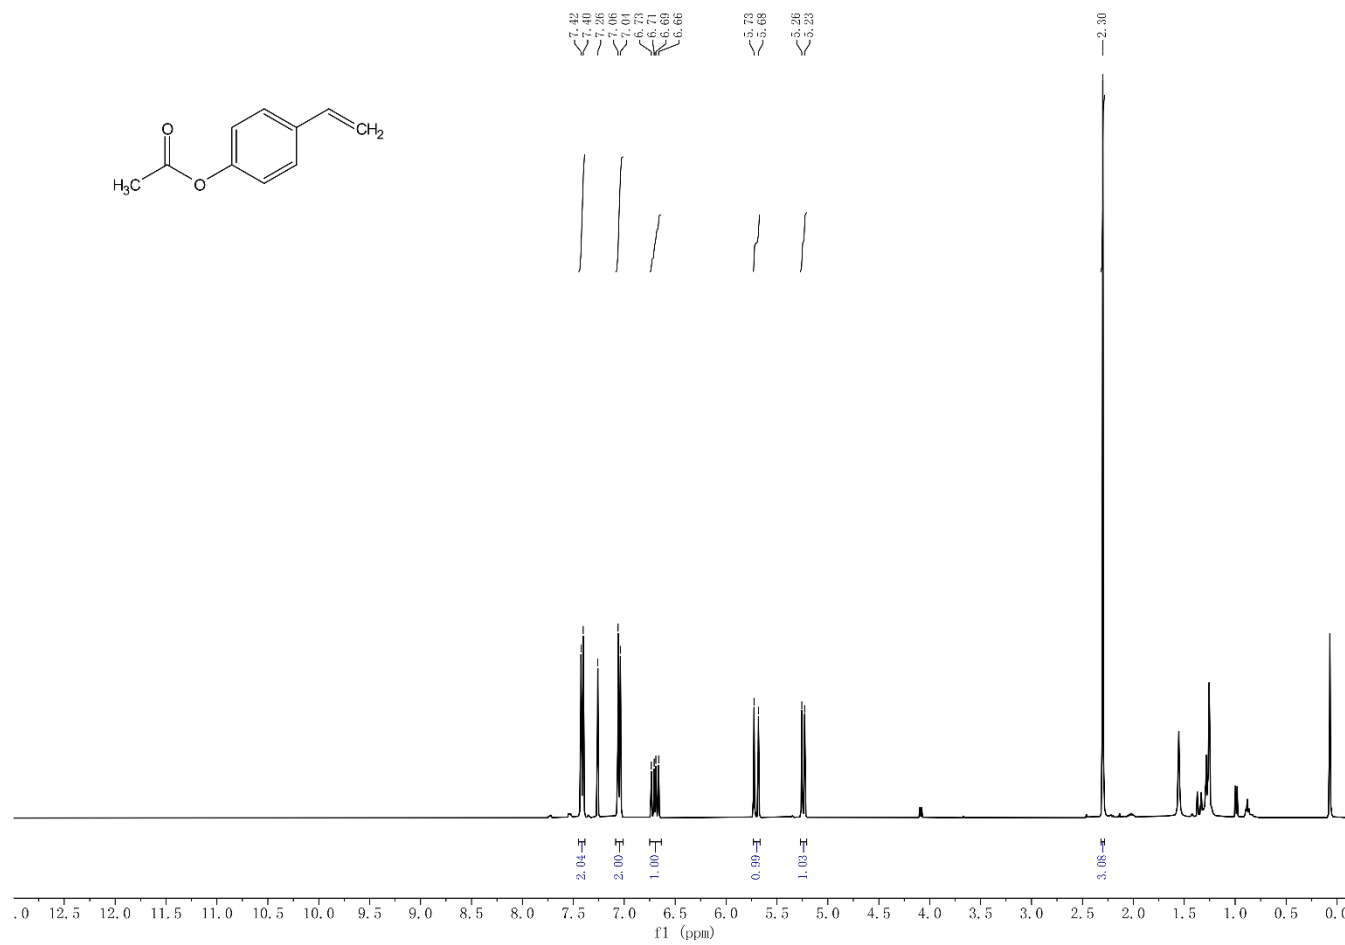

$^{13}\text{C}\{^1\text{H}\}$  NMR (101 MHz,  $\text{CDCl}_3$ ) spectrum of 2e

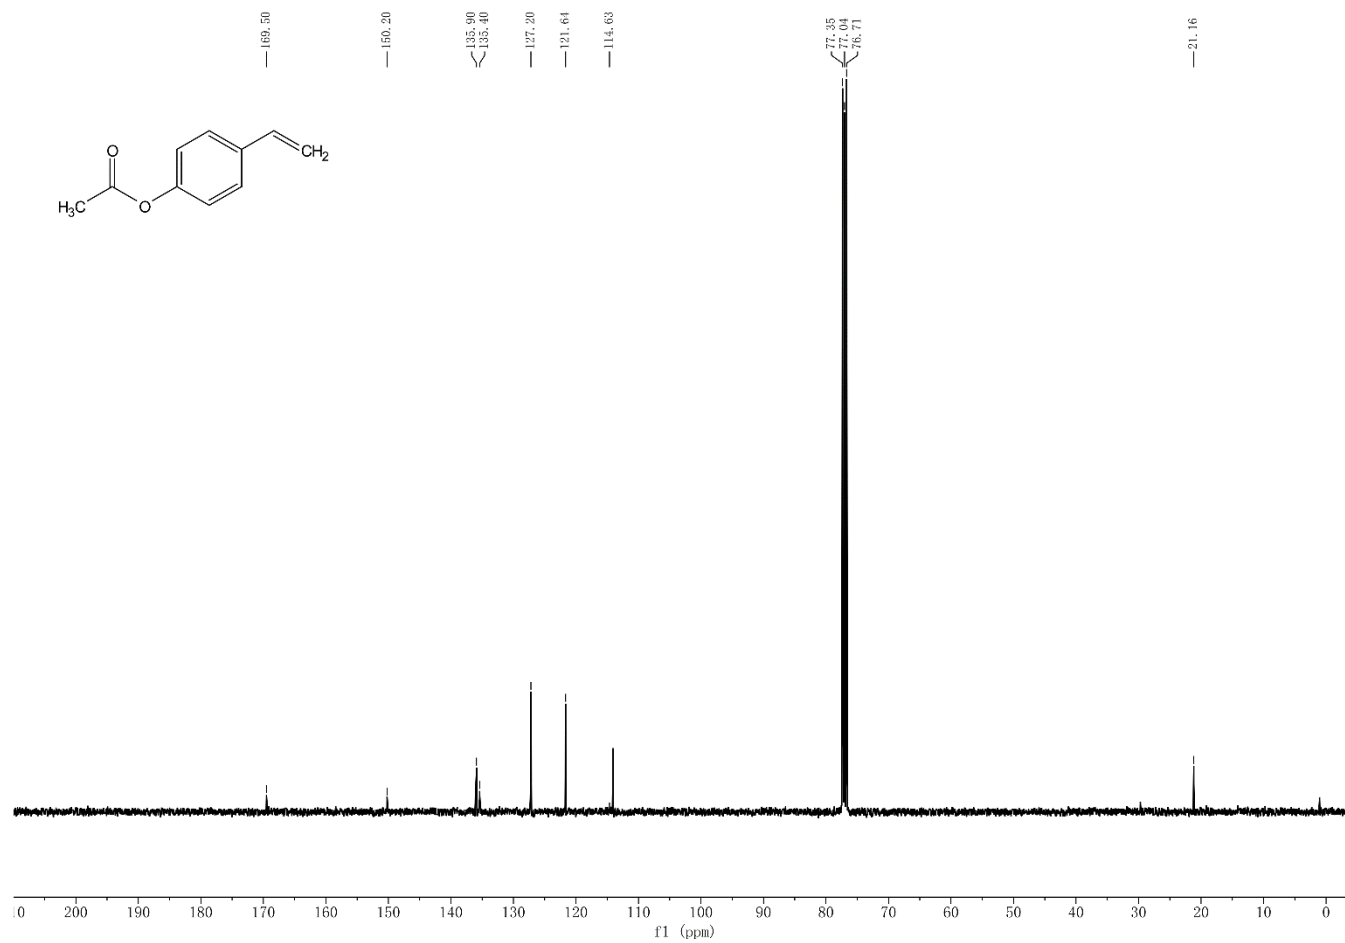

<sup>1</sup>H NMR (400 MHz, CDCl<sub>3</sub>) spectrum of 2f

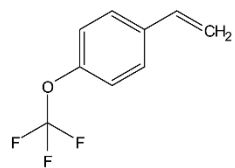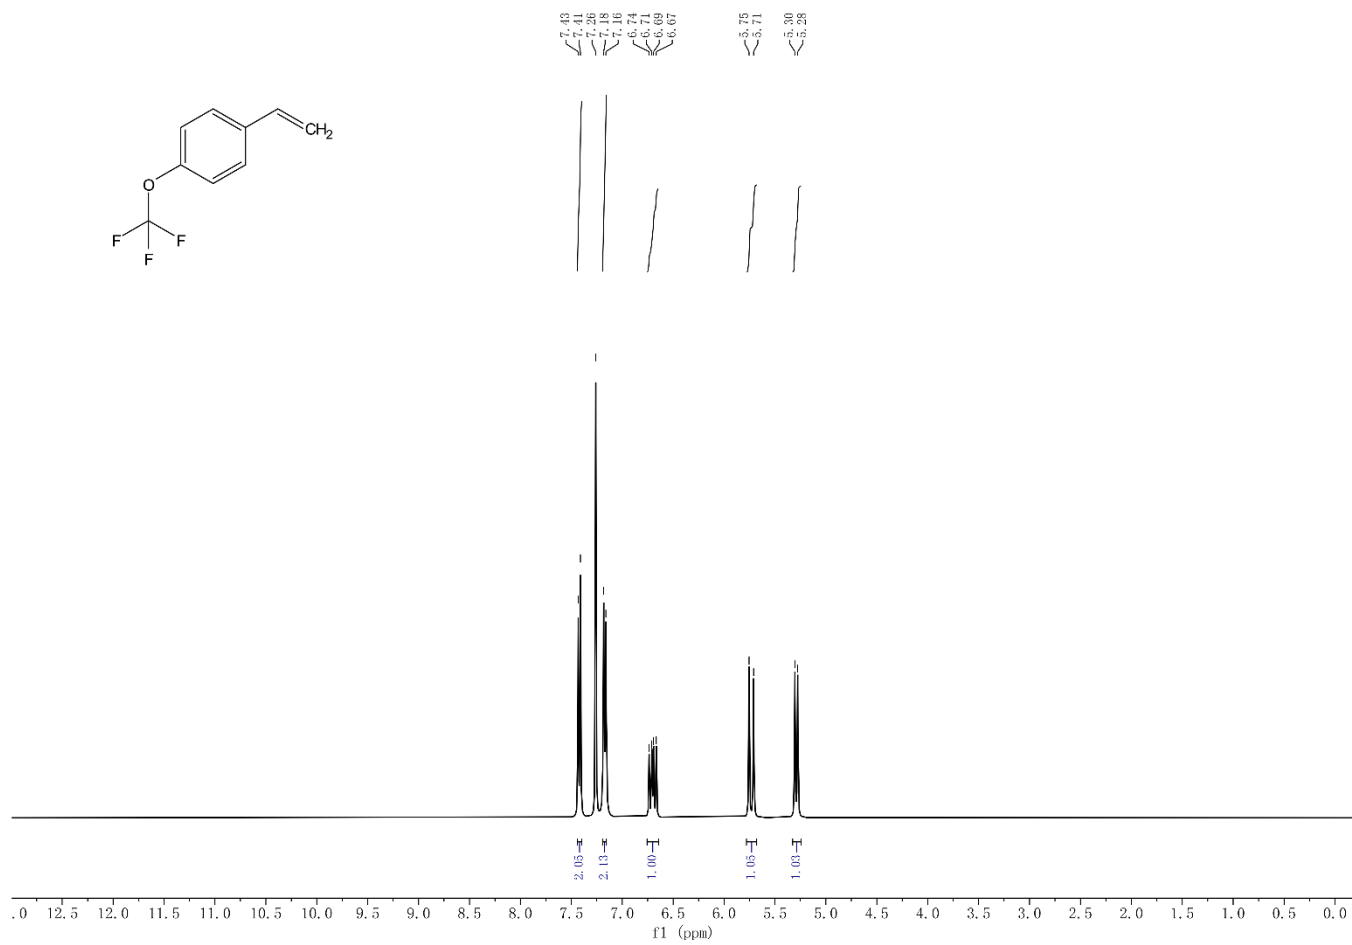

<sup>13</sup>F NMR (377 MHz, CDCl<sub>3</sub>) spectrum of 2f

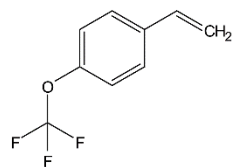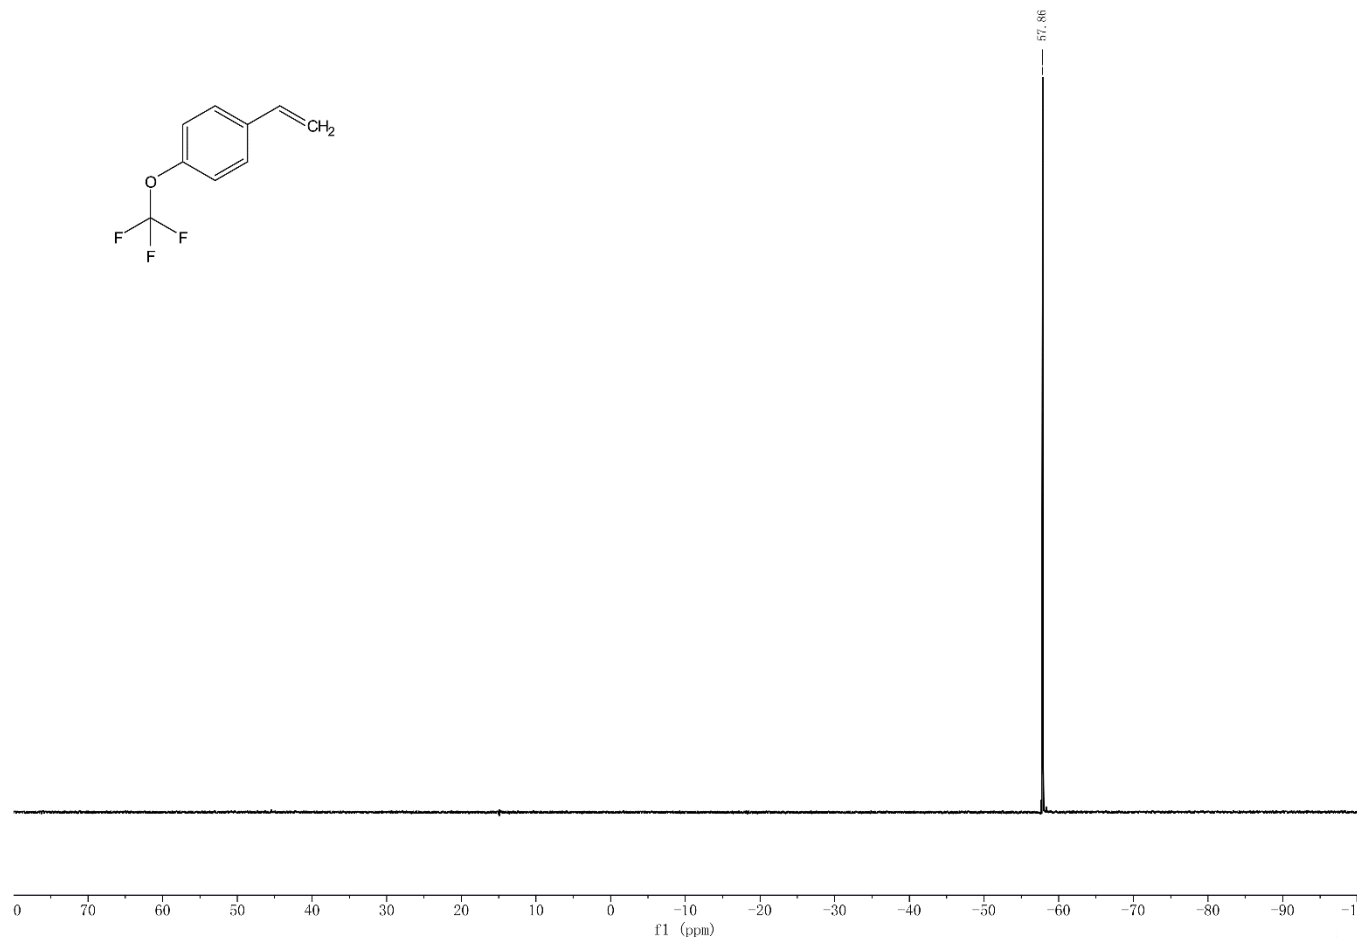



<sup>1</sup>H NMR (400 MHz, CDCl<sub>3</sub>) spectrum of 2g

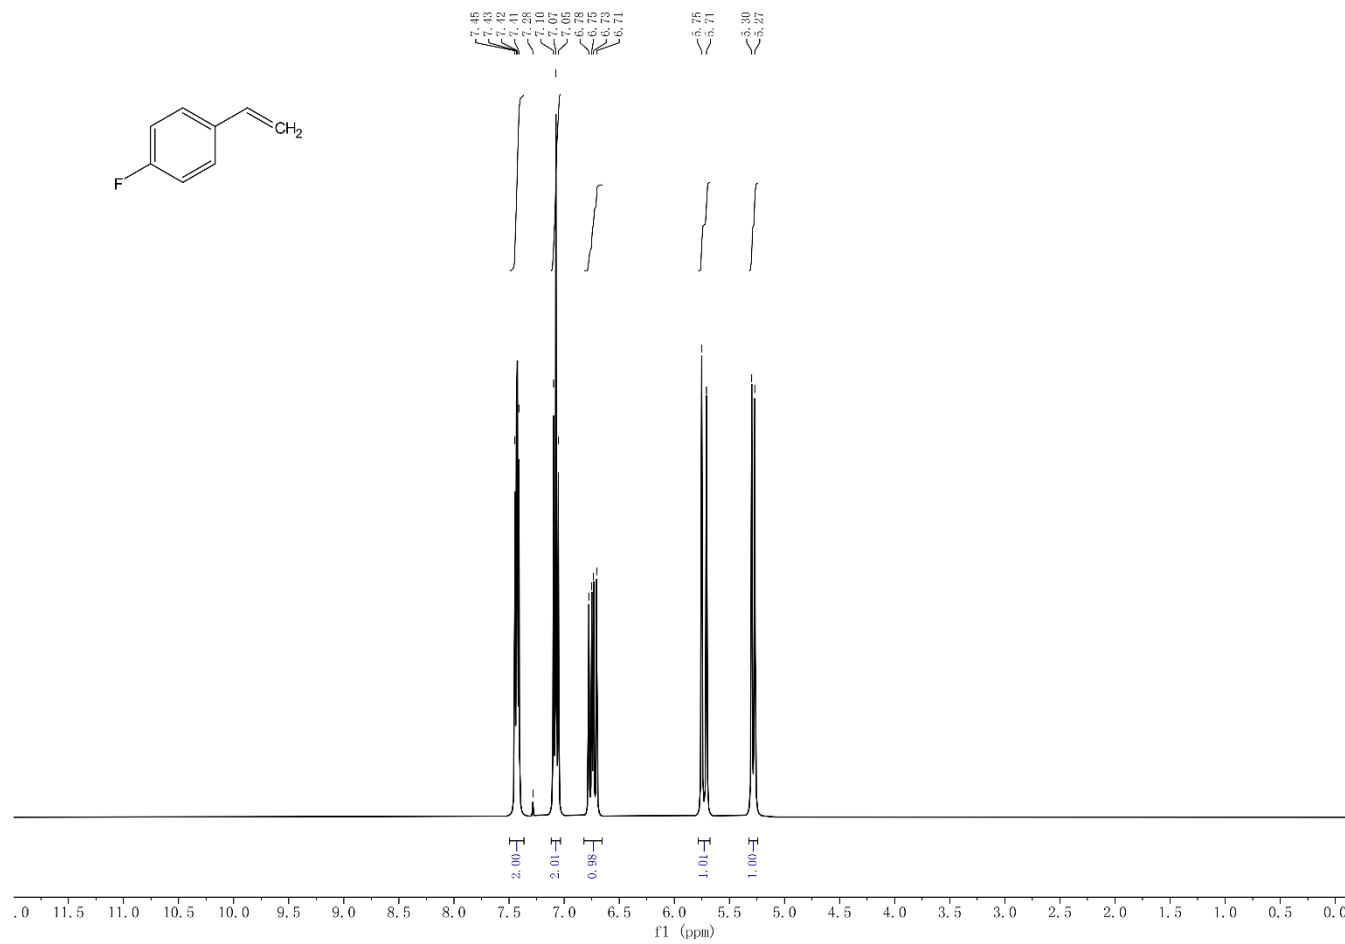

$^{13}\text{C}\{^1\text{H}\}$  NMR (101 MHz,  $\text{CDCl}_3$ ) spectrum of 2g

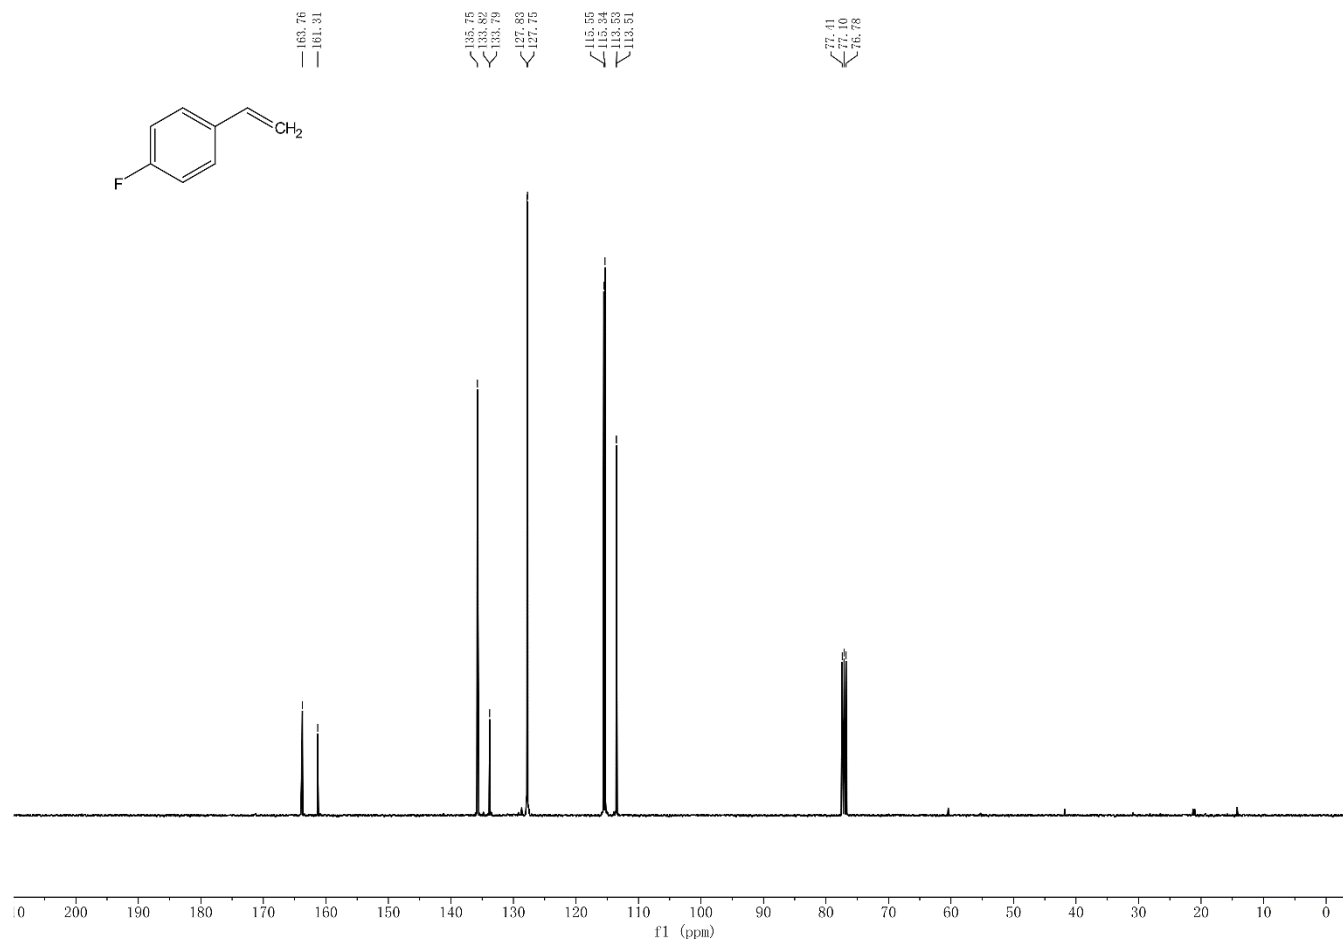

<sup>19</sup>F NMR (377 MHz, CDCl<sub>3</sub>) spectrum of 2g

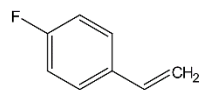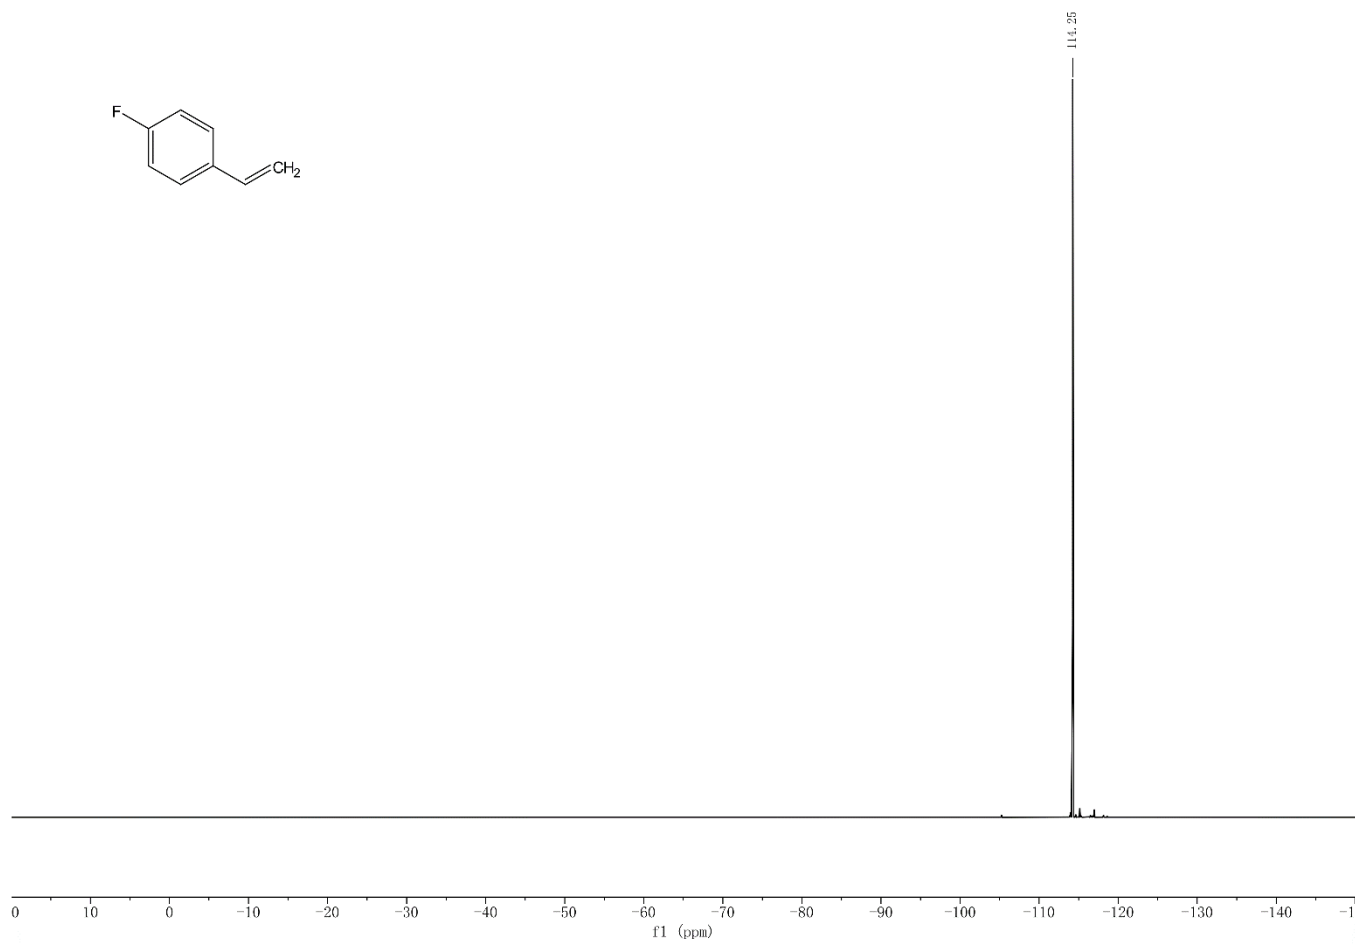

<sup>1</sup>H NMR (400 MHz, CDCl<sub>3</sub>) spectrum of 2h

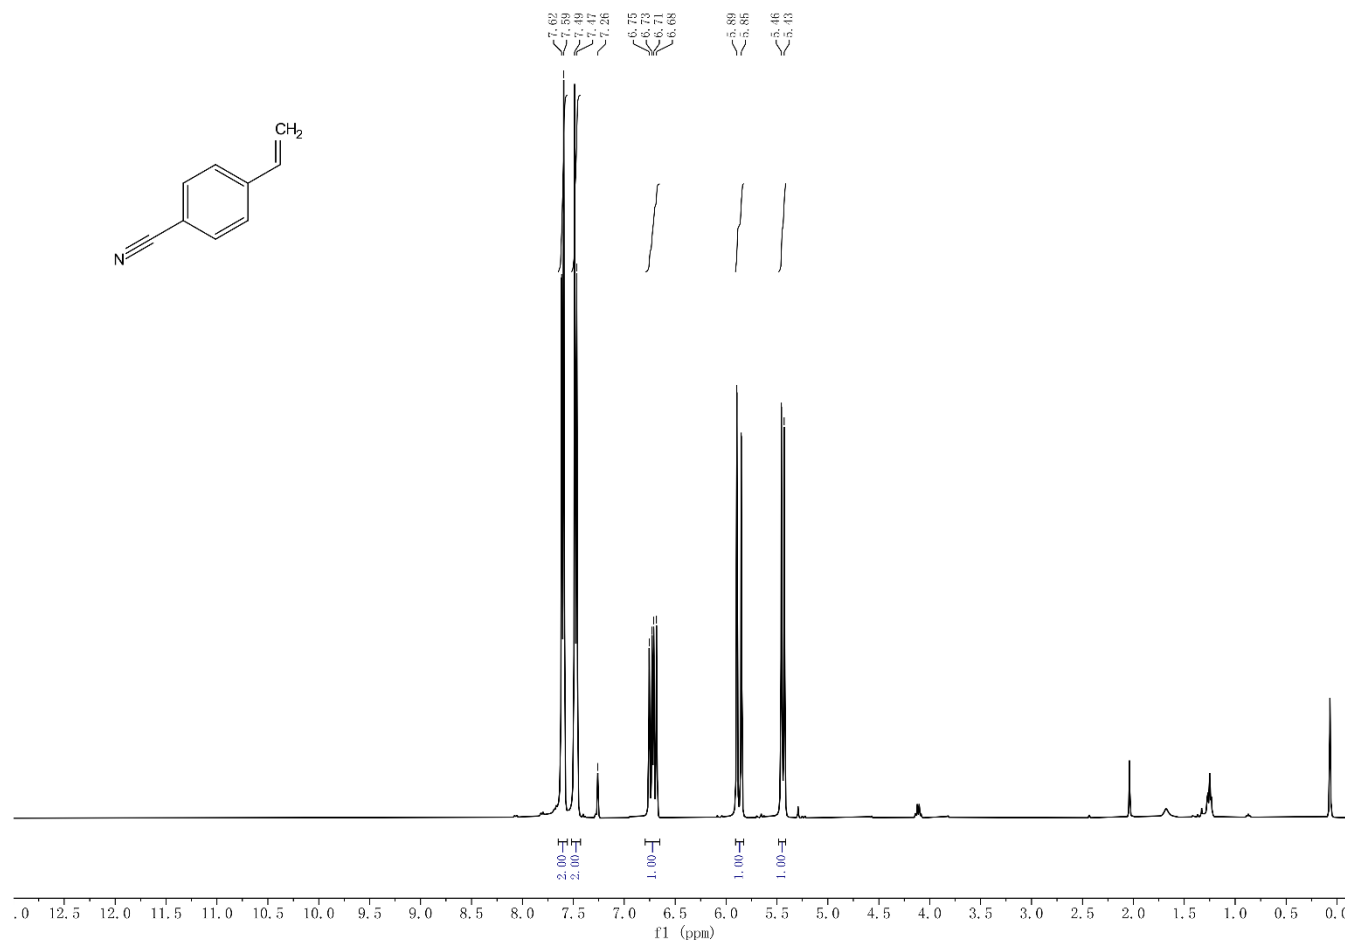

$^{13}\text{C}\{^1\text{H}\}$  NMR (101 MHz,  $\text{CDCl}_3$ ) spectrum of 2h

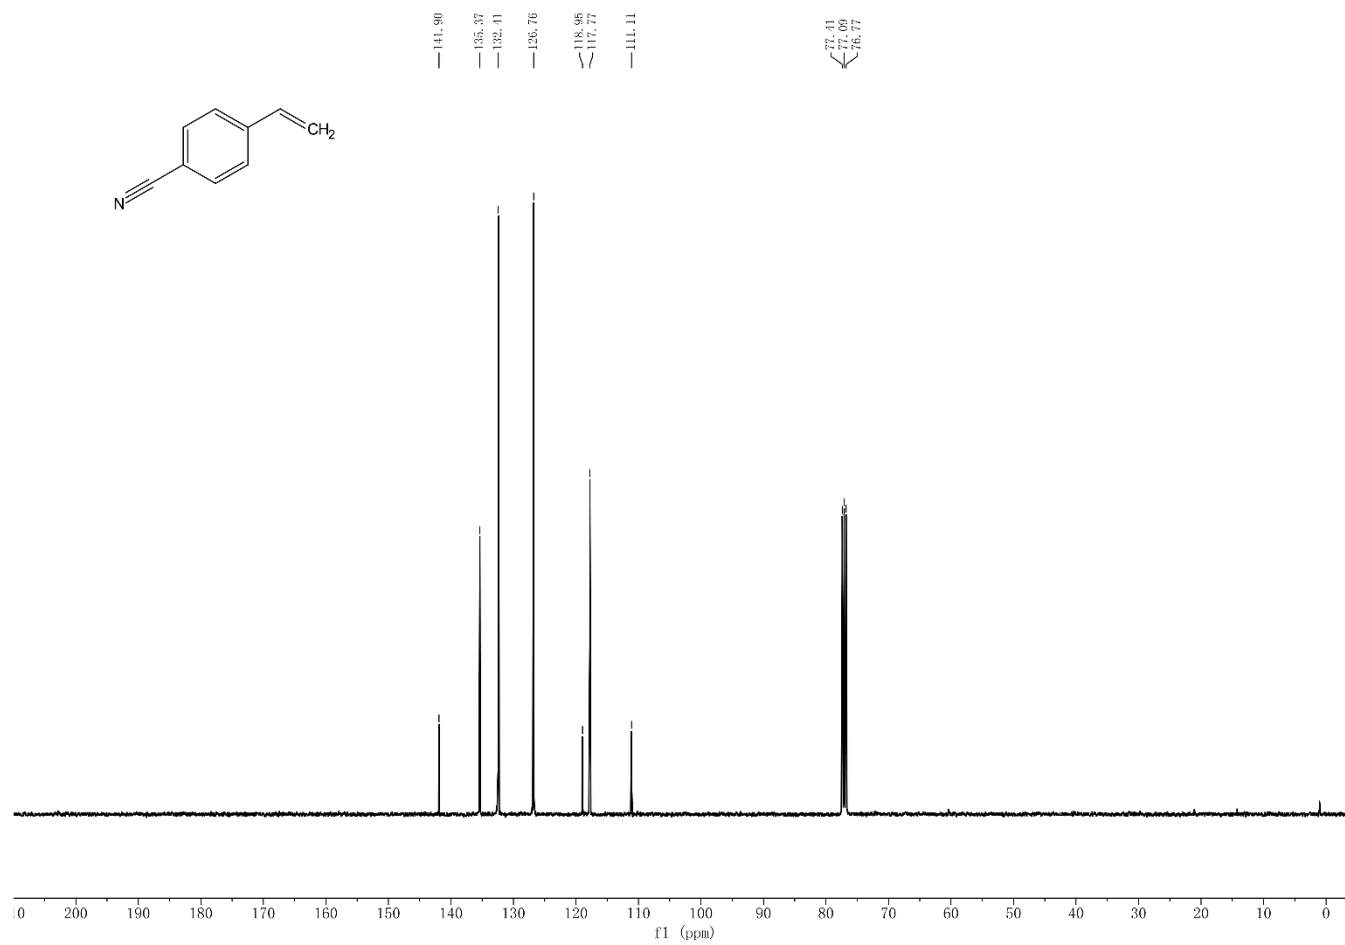

<sup>1</sup>H NMR (400 MHz, CDCl<sub>3</sub>) spectrum of 2i

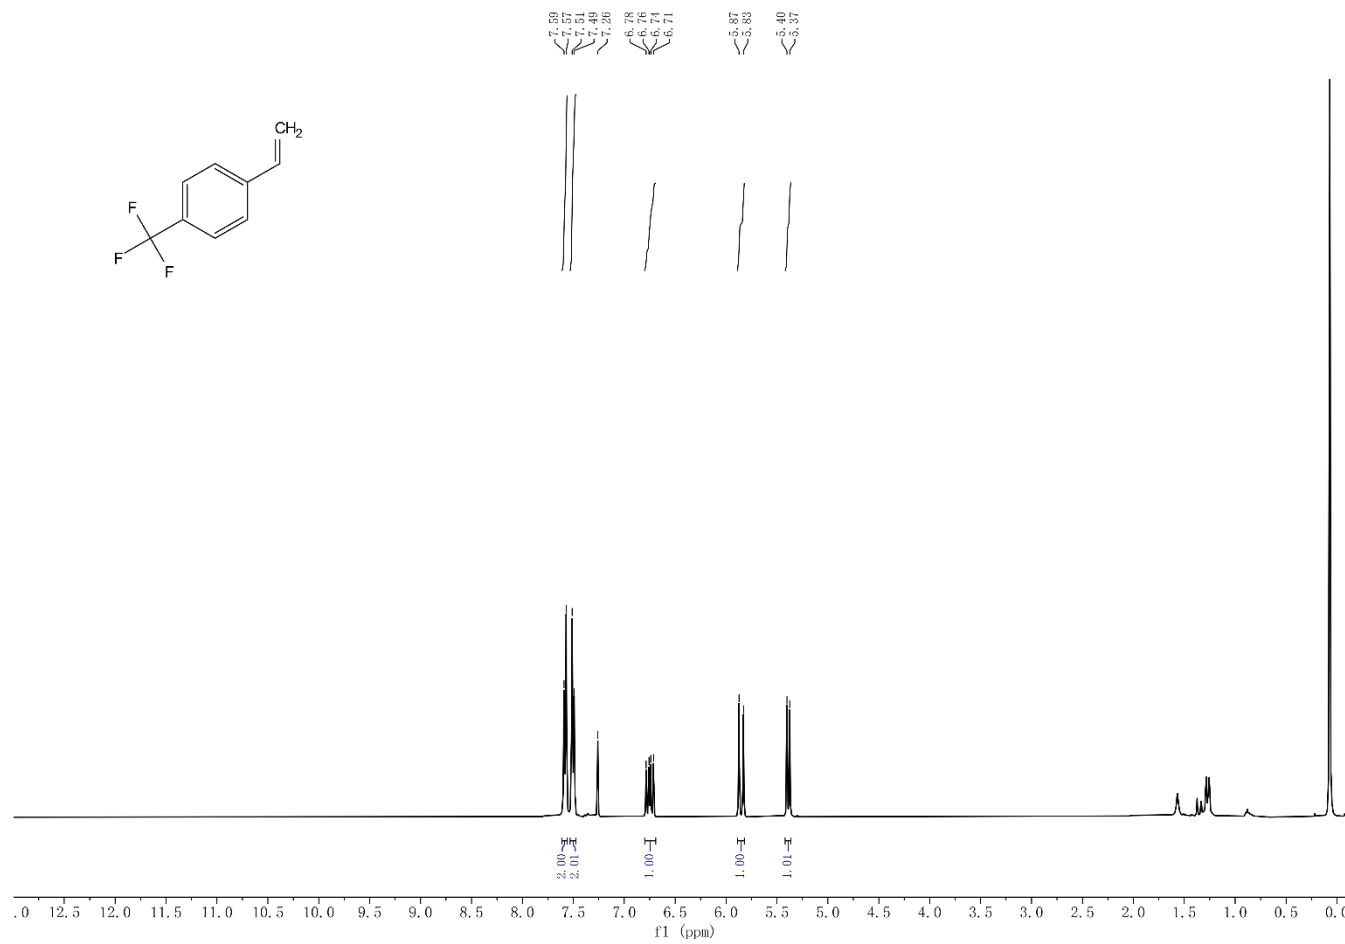

$^{13}\text{C}\{^1\text{H}\}$  NMR (101 MHz,  $\text{CDCl}_3$ ) spectrum of 2i

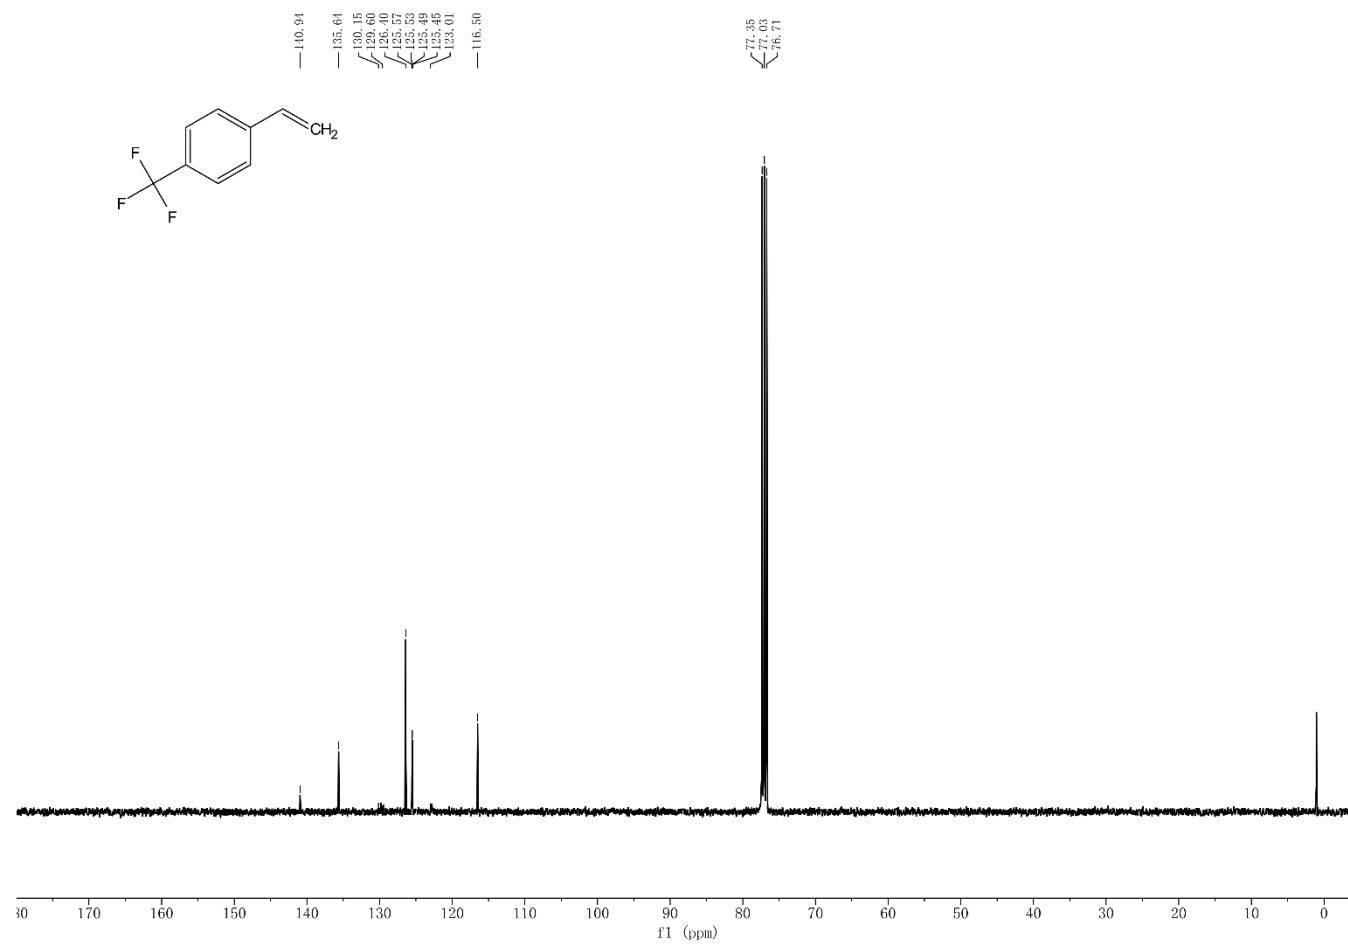

<sup>19</sup>F NMR (377 MHz, CDCl<sub>3</sub>) spectrum of 2i

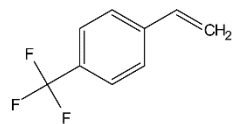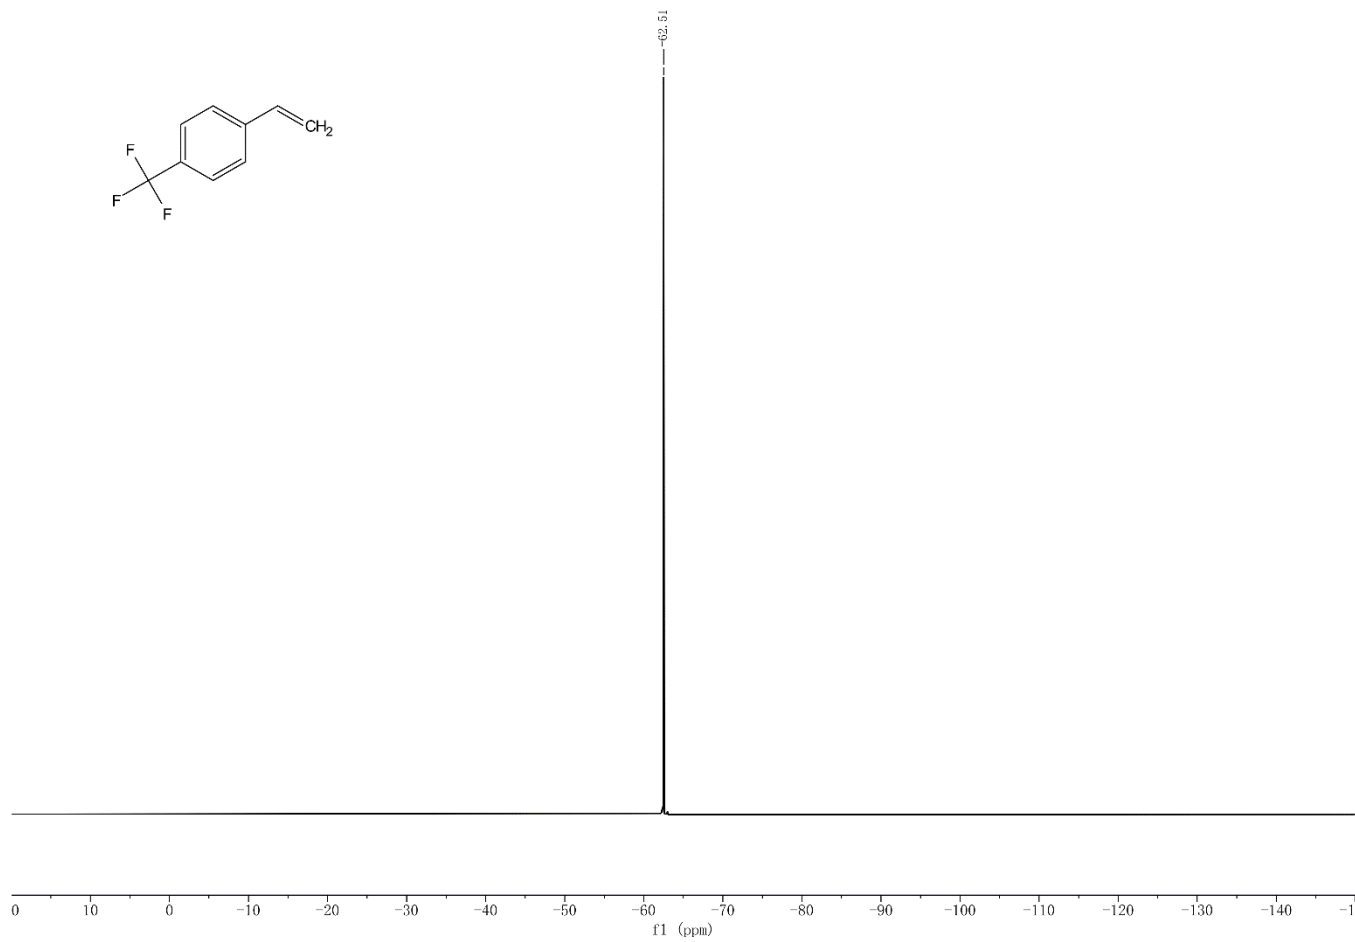



<sup>1</sup>H NMR (400 MHz, CDCl<sub>3</sub>) spectrum of 2j

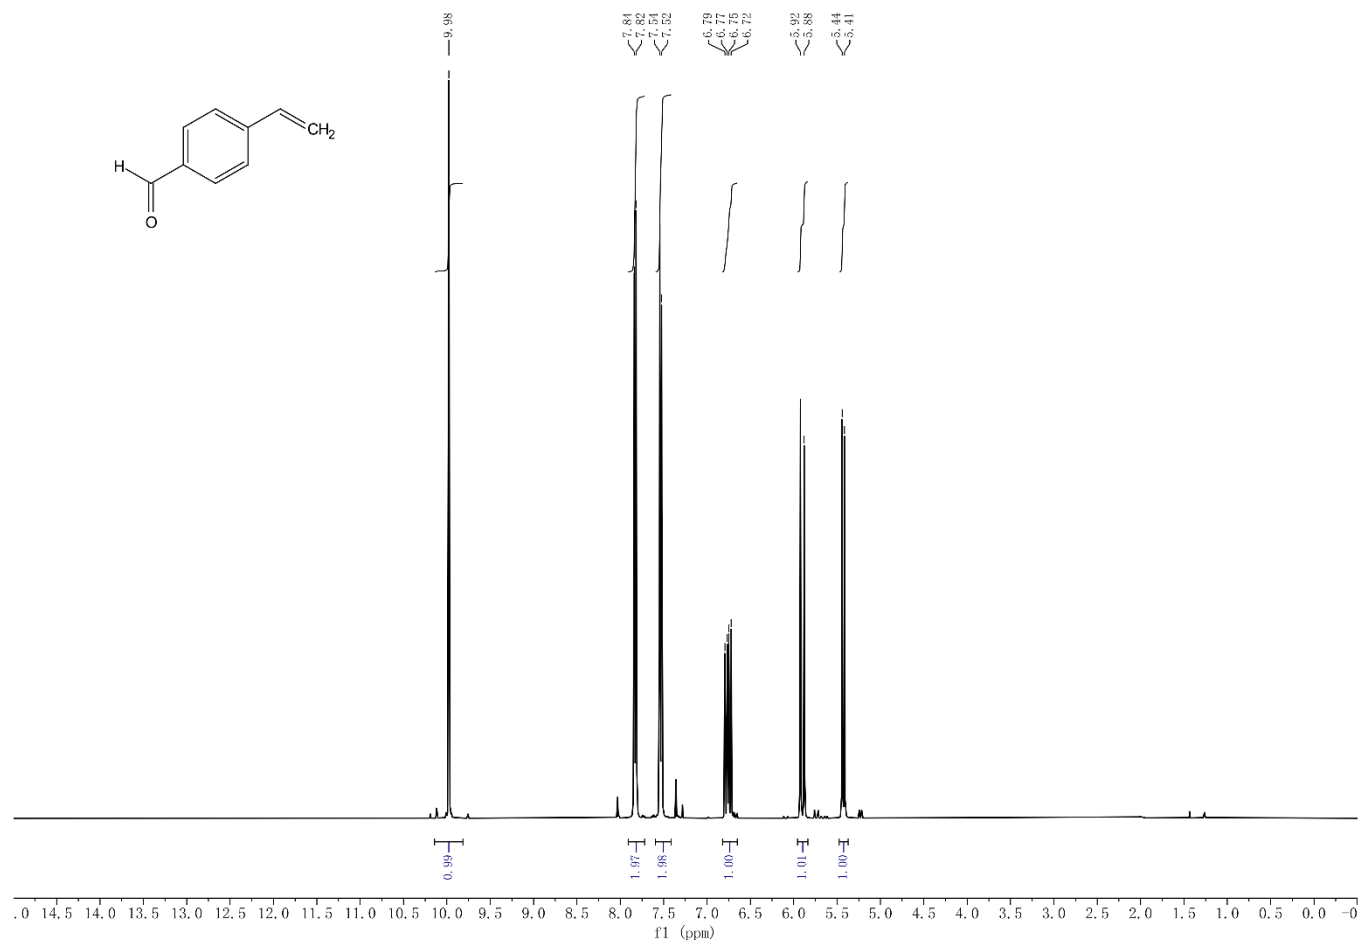

$^{13}\text{C}\{^1\text{H}\}$  NMR (101 MHz,  $\text{CDCl}_3$ ) spectrum of 2j

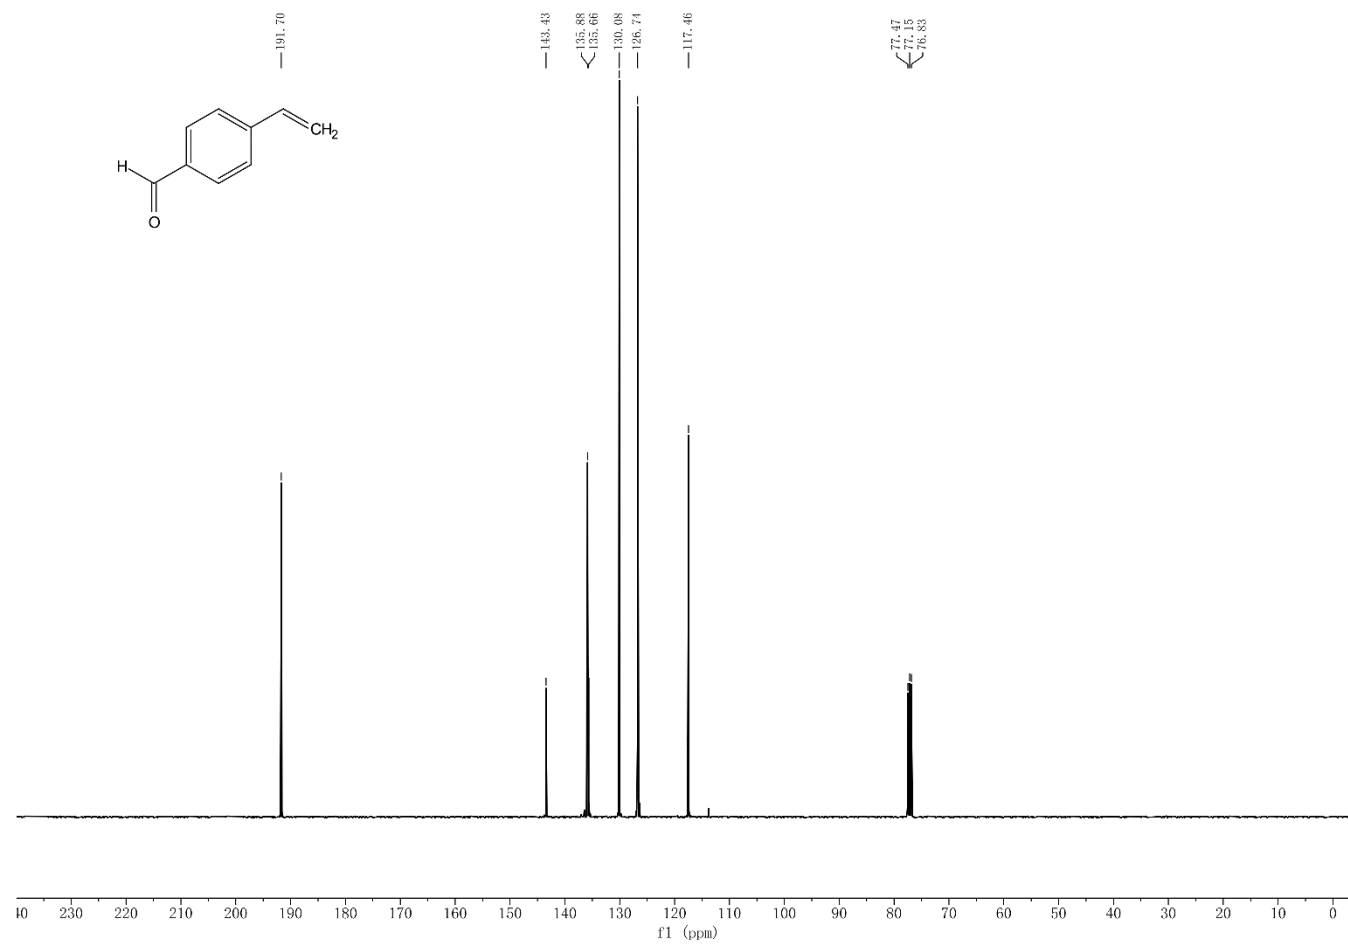

<sup>1</sup>H NMR (400 MHz, CDCl<sub>3</sub>) spectrum of 2k

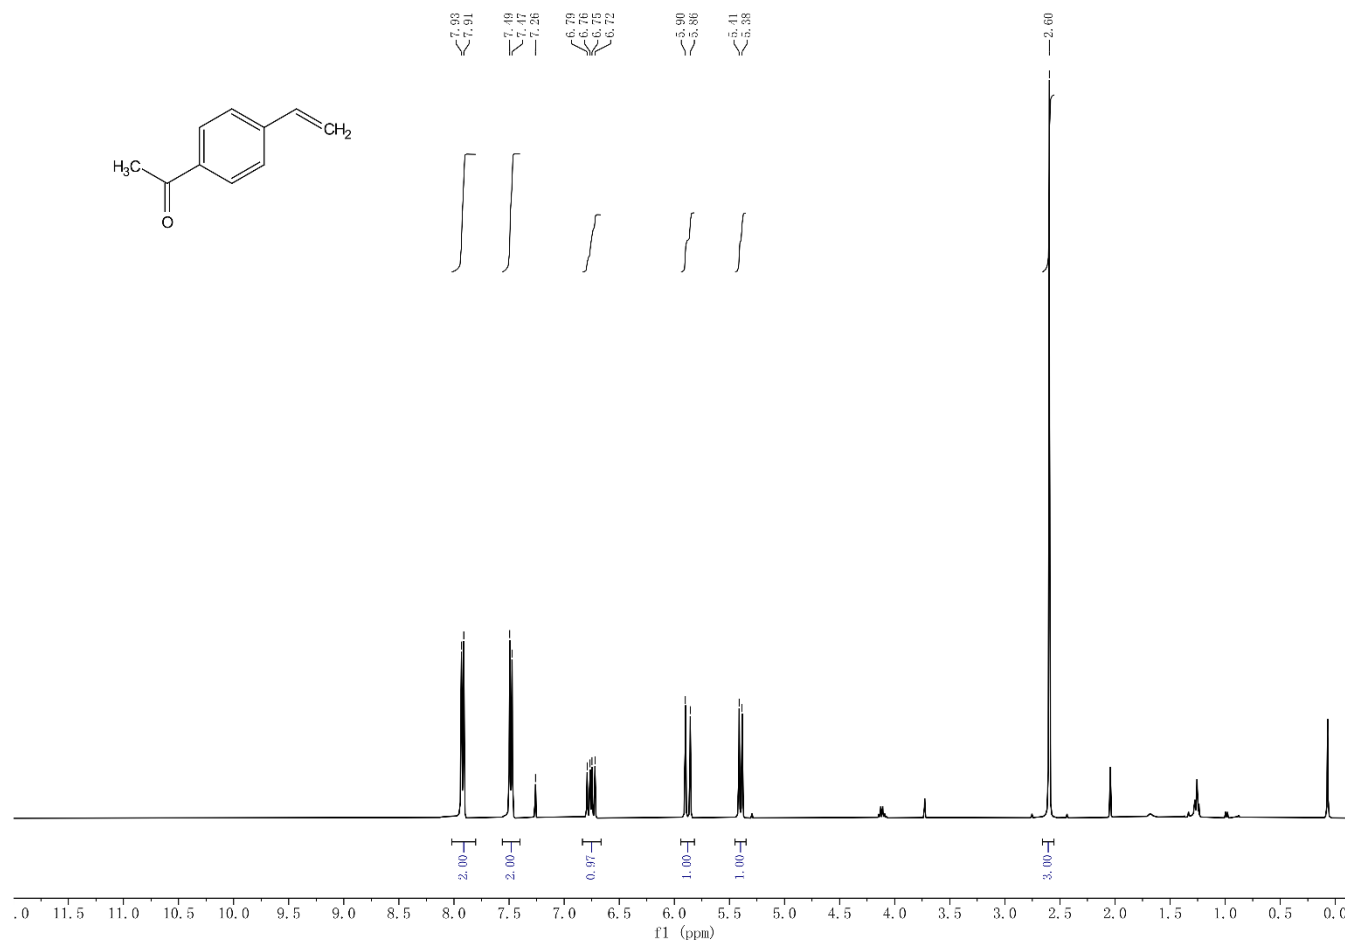

$^{13}\text{C}\{^1\text{H}\}$  NMR (101 MHz,  $\text{CDCl}_3$ ) spectrum of 2k

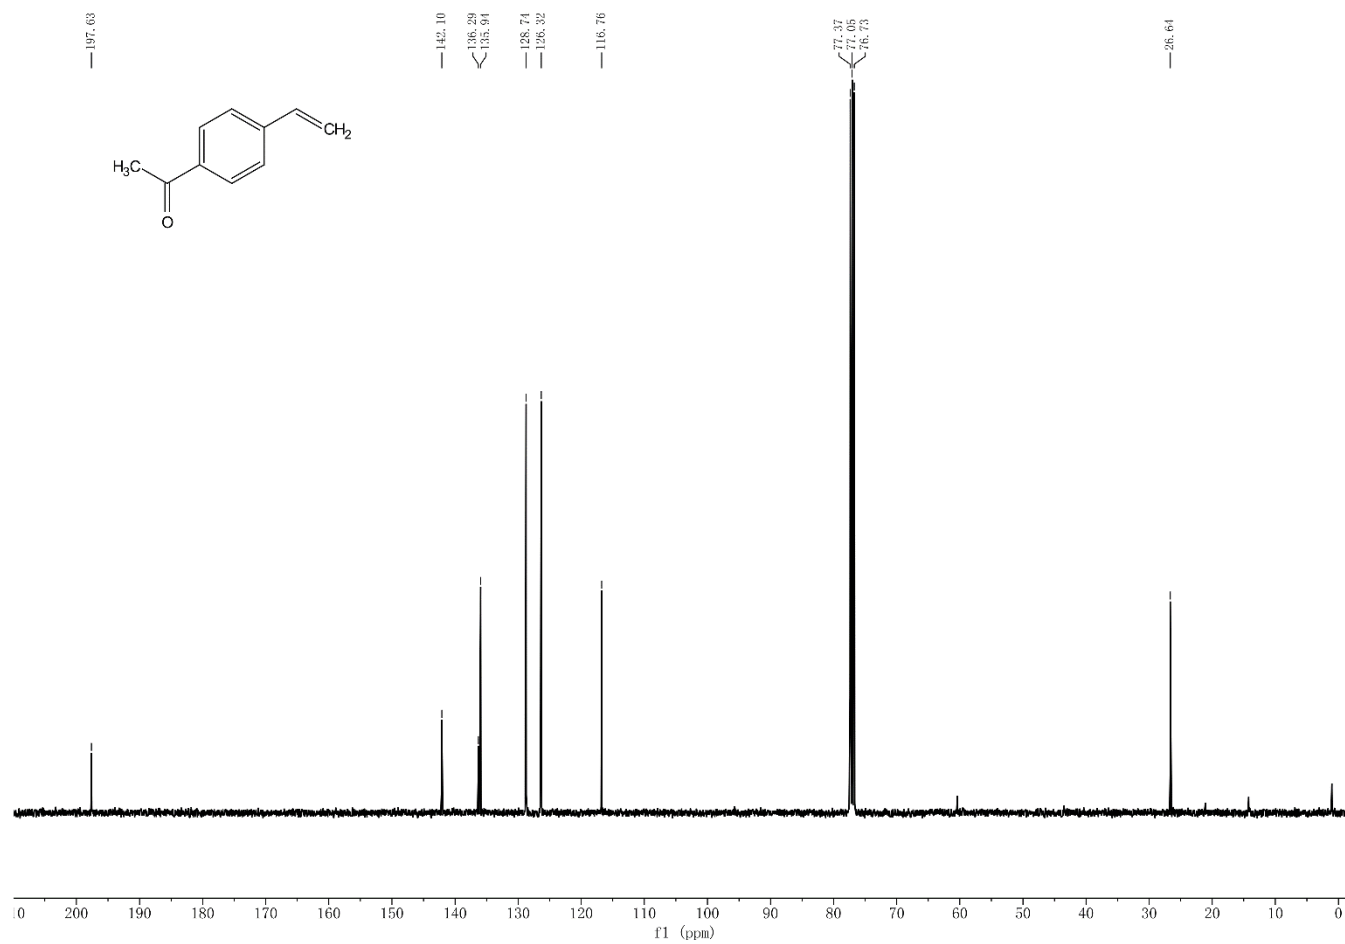

<sup>1</sup>H NMR (400 MHz, CDCl<sub>3</sub>) spectrum of 2l

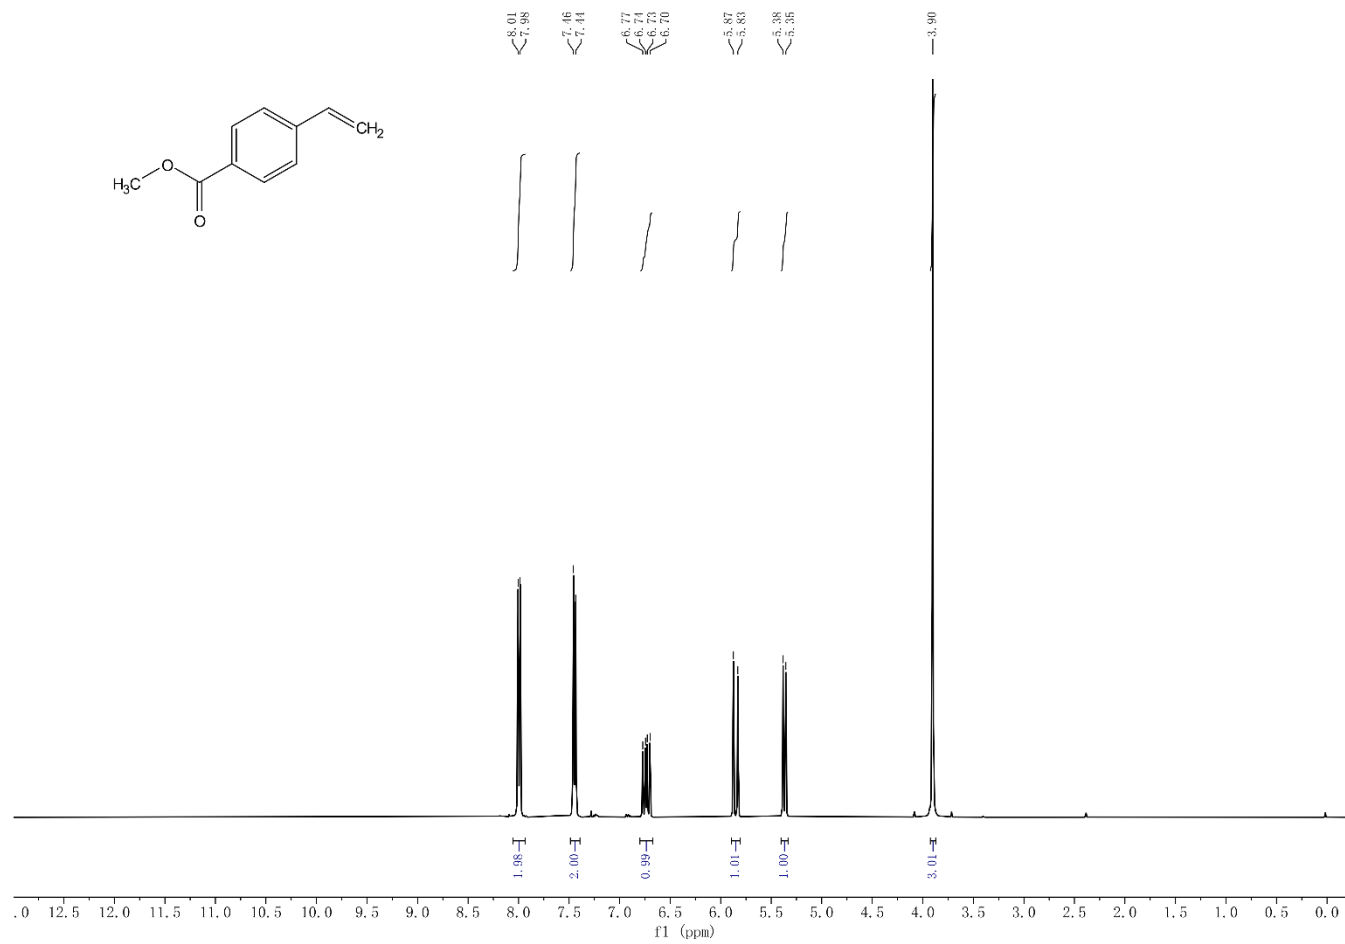

$^{13}\text{C}\{^1\text{H}\}$  NMR (101 MHz,  $\text{CDCl}_3$ ) spectrum of 2l

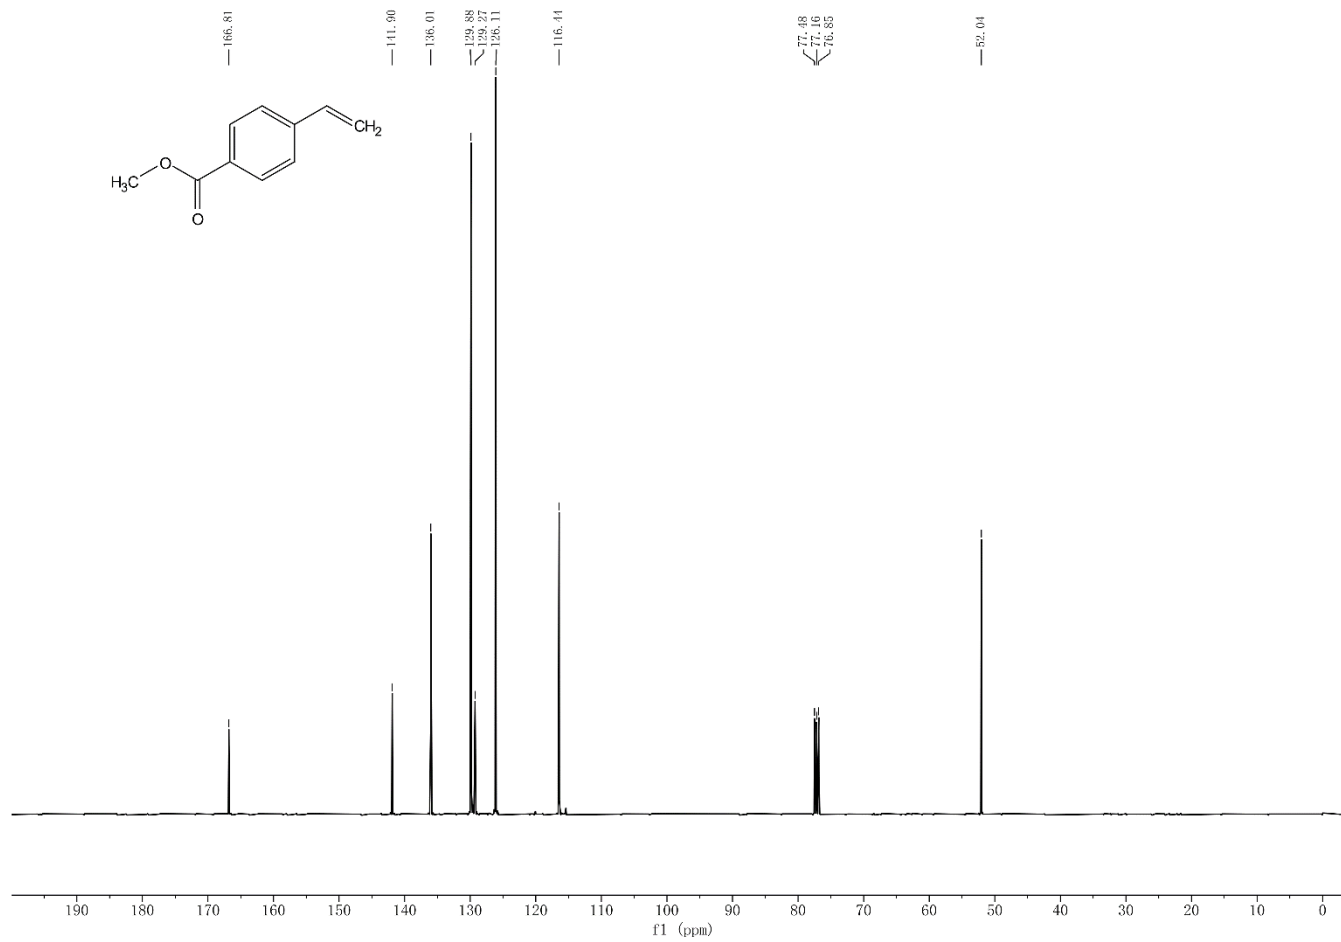

<sup>1</sup>H NMR (400 MHz, CDCl<sub>3</sub>) spectrum of 3a

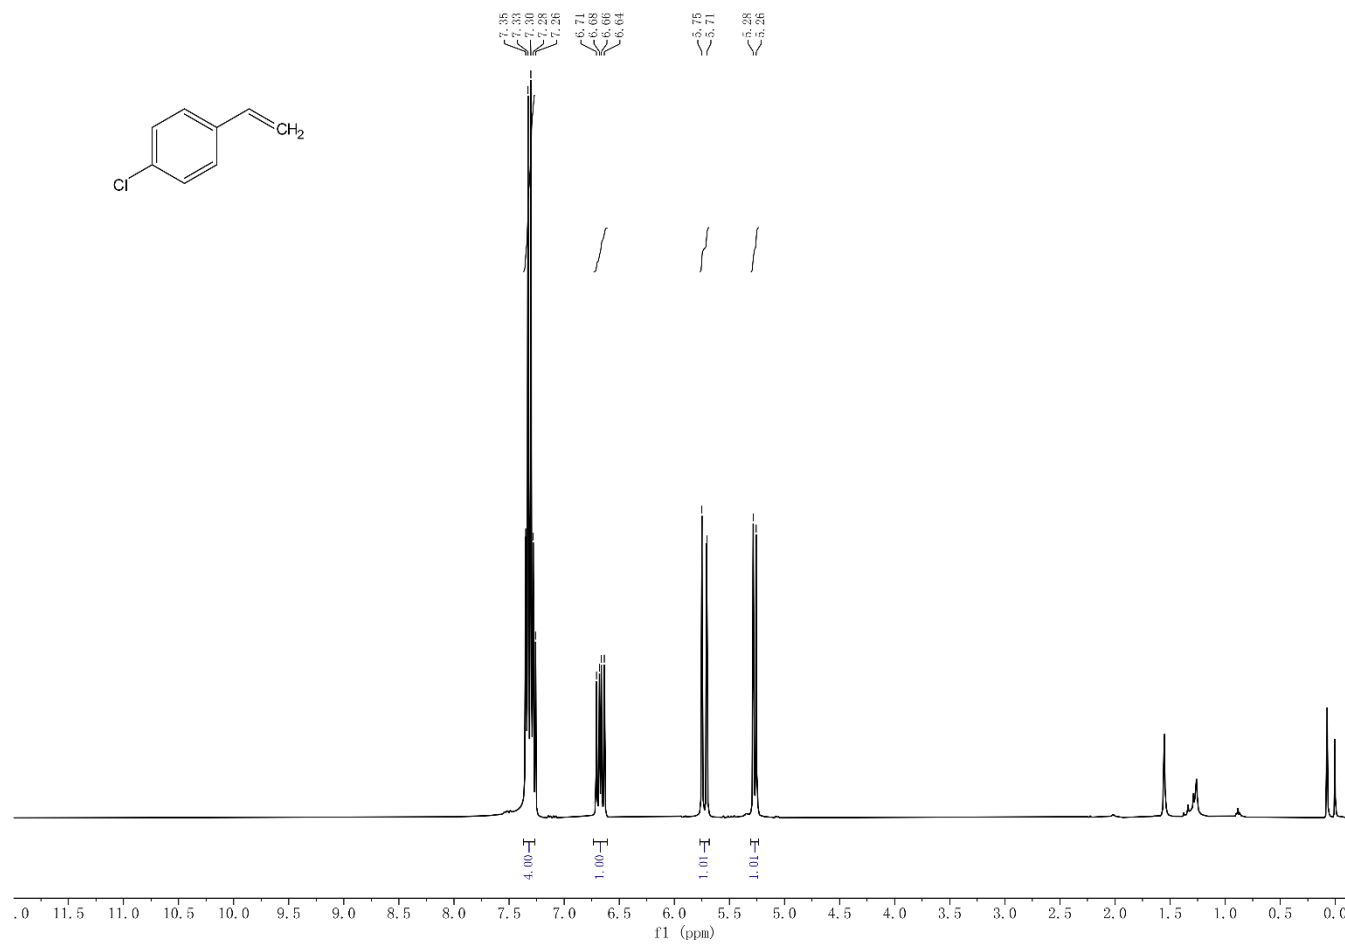

$^{13}\text{C}\{^1\text{H}\}$  NMR (101 MHz,  $\text{CDCl}_3$ ) spectrum of 3a

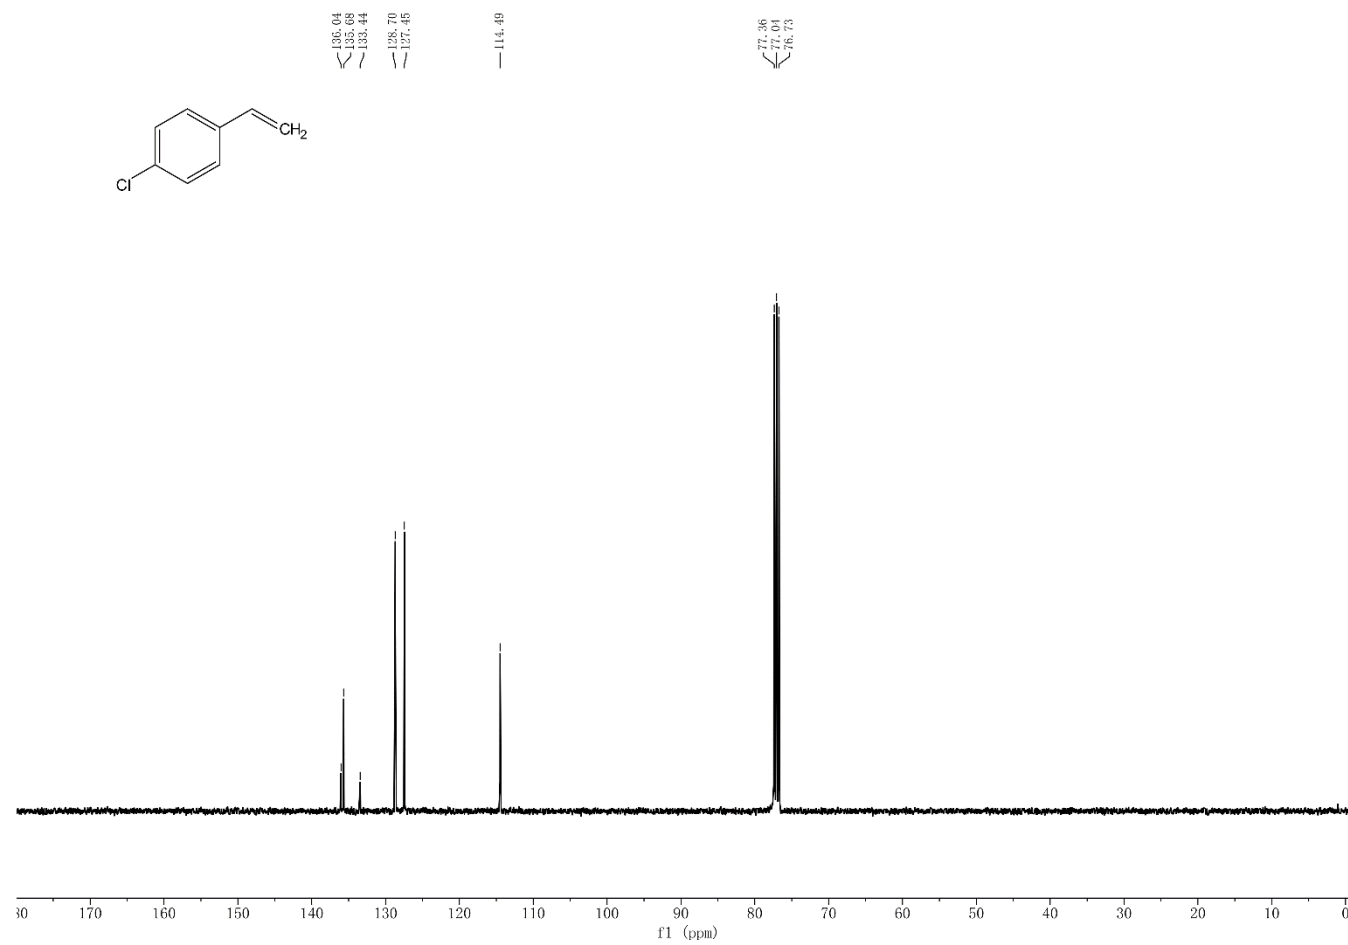



<sup>1</sup>H NMR (400 MHz, CDCl<sub>3</sub>) spectrum of 3b

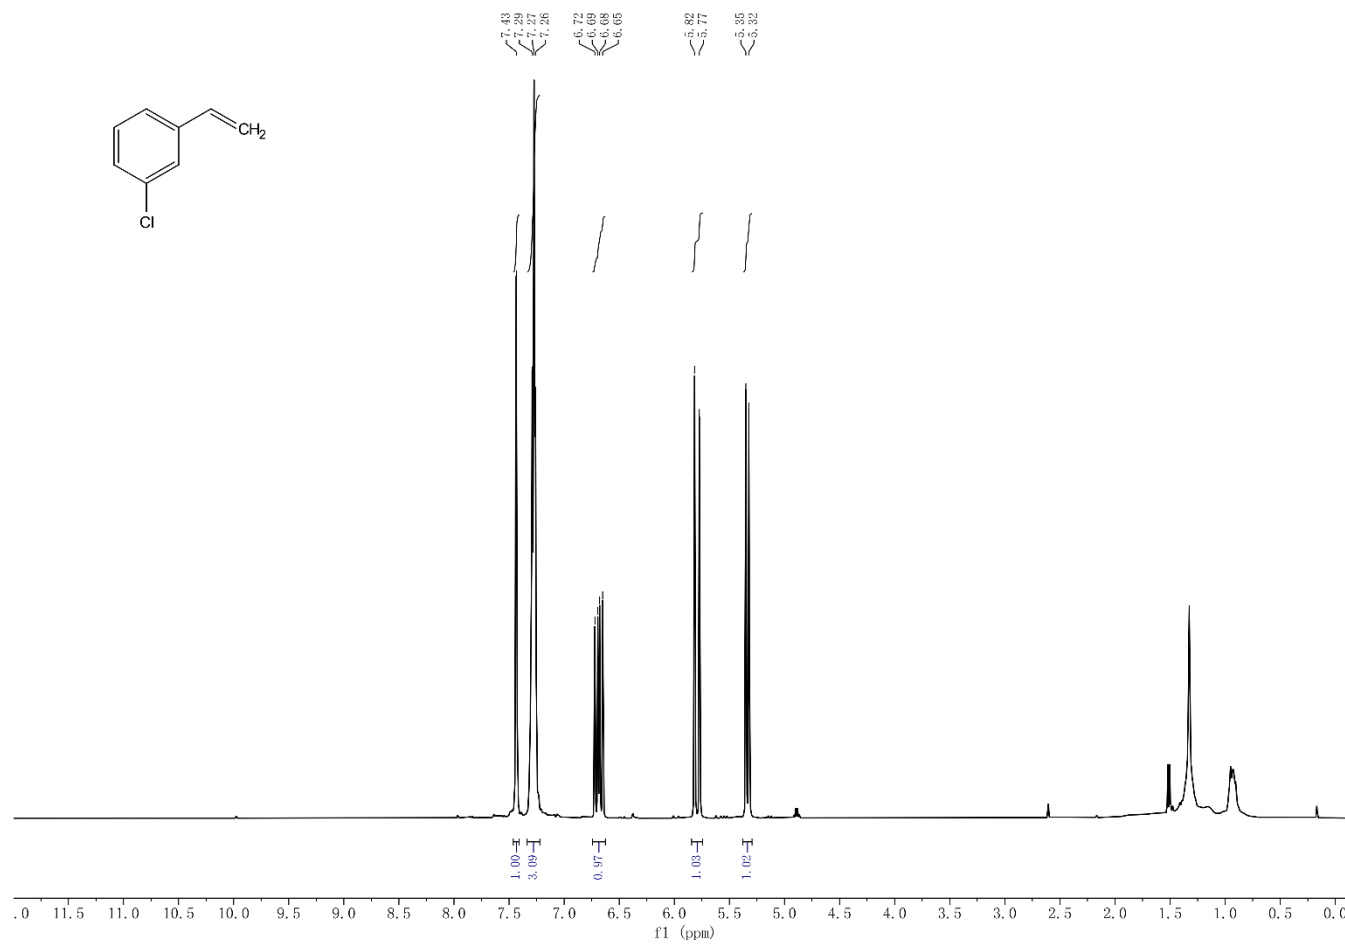

$^{13}\text{C}\{^1\text{H}\}$  NMR (101 MHz,  $\text{CDCl}_3$ ) spectrum of 3b

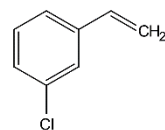

139.46  
135.87  
134.87  
129.79  
127.81  
126.21  
124.62  
115.38  
77.44  
77.12  
76.81

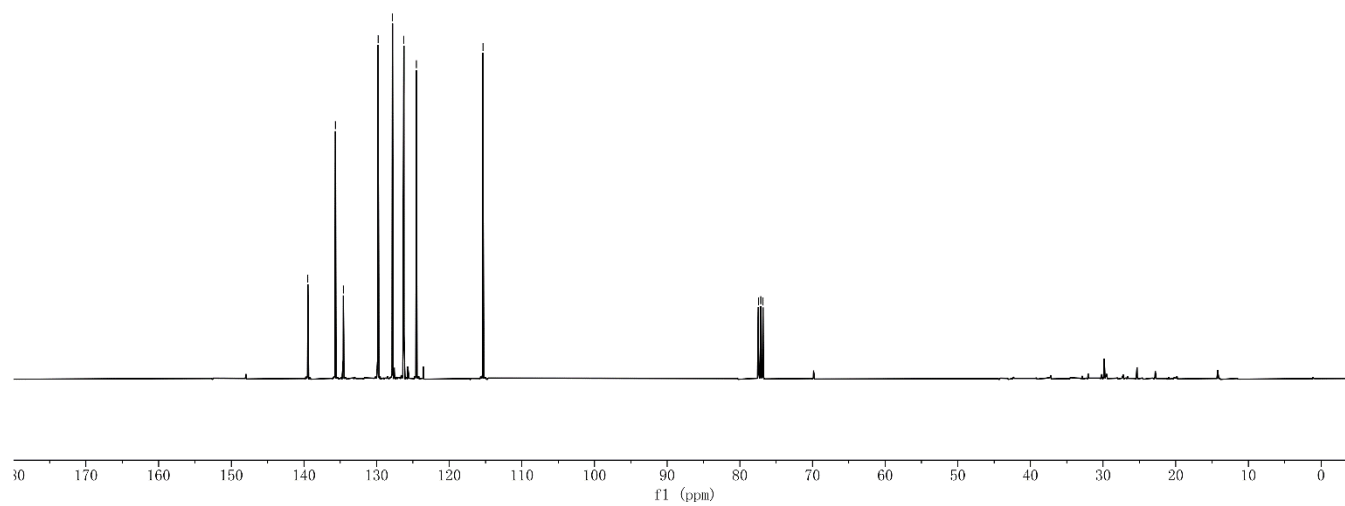

<sup>1</sup>H NMR (400 MHz, CDCl<sub>3</sub>) spectrum of 3c

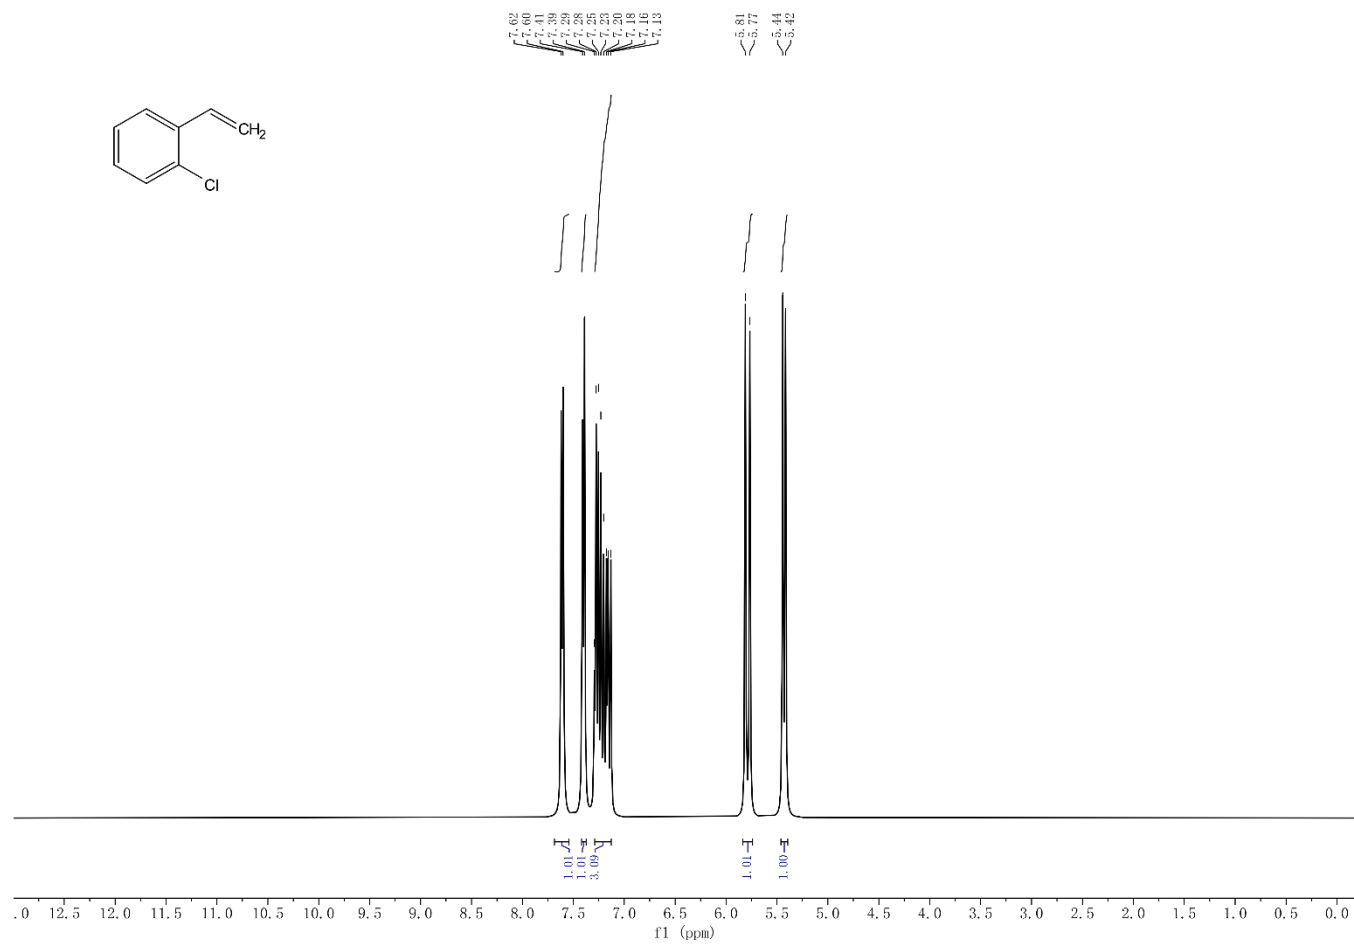

$^{13}\text{C}\{^1\text{H}\}$  NMR (101 MHz,  $\text{CDCl}_3$ ) spectrum of 3c

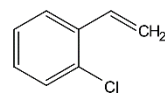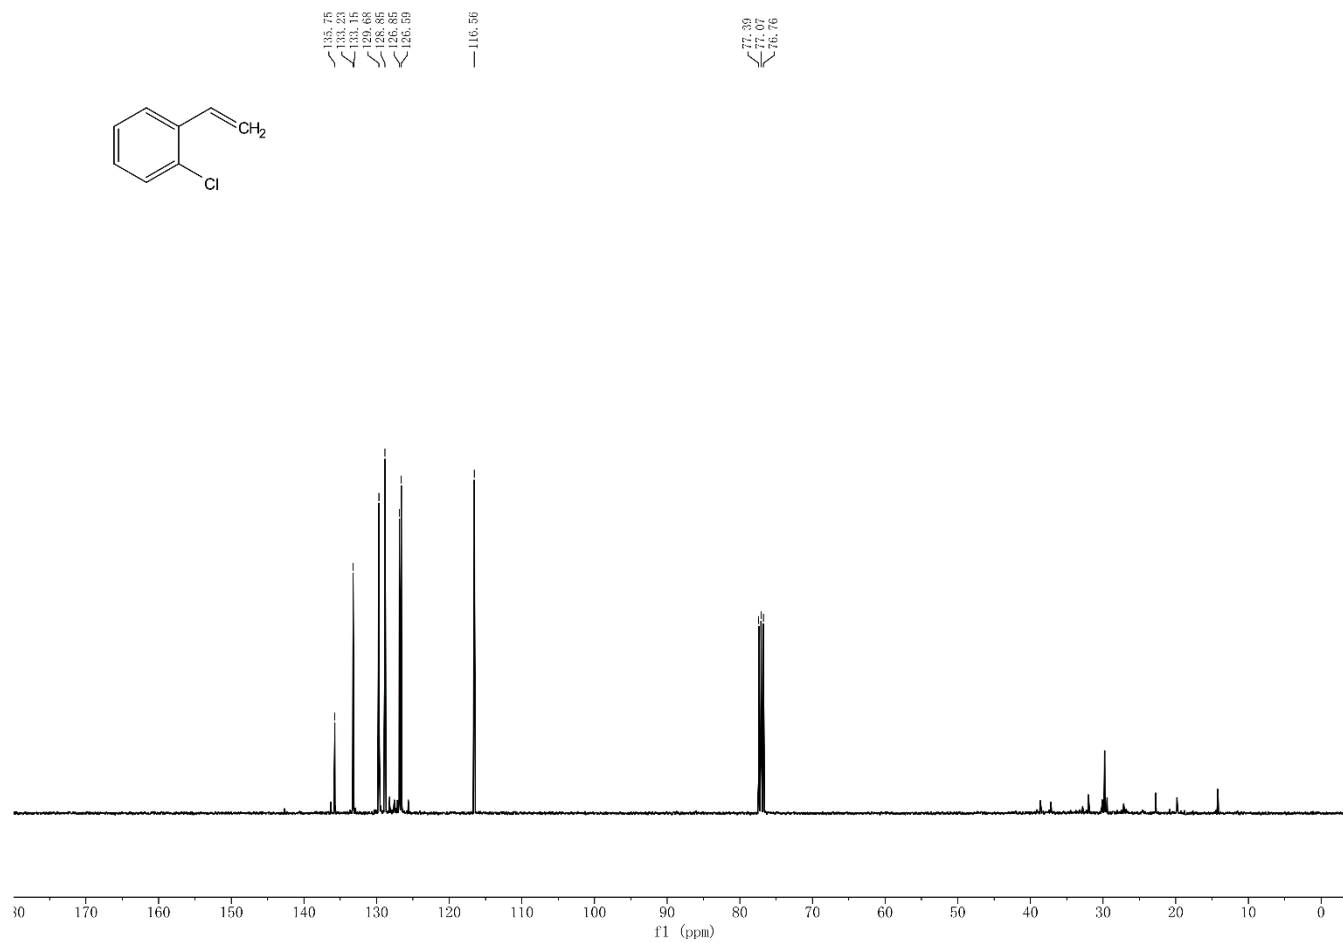

<sup>1</sup>H NMR (400 MHz, CDCl<sub>3</sub>) spectrum of 3d

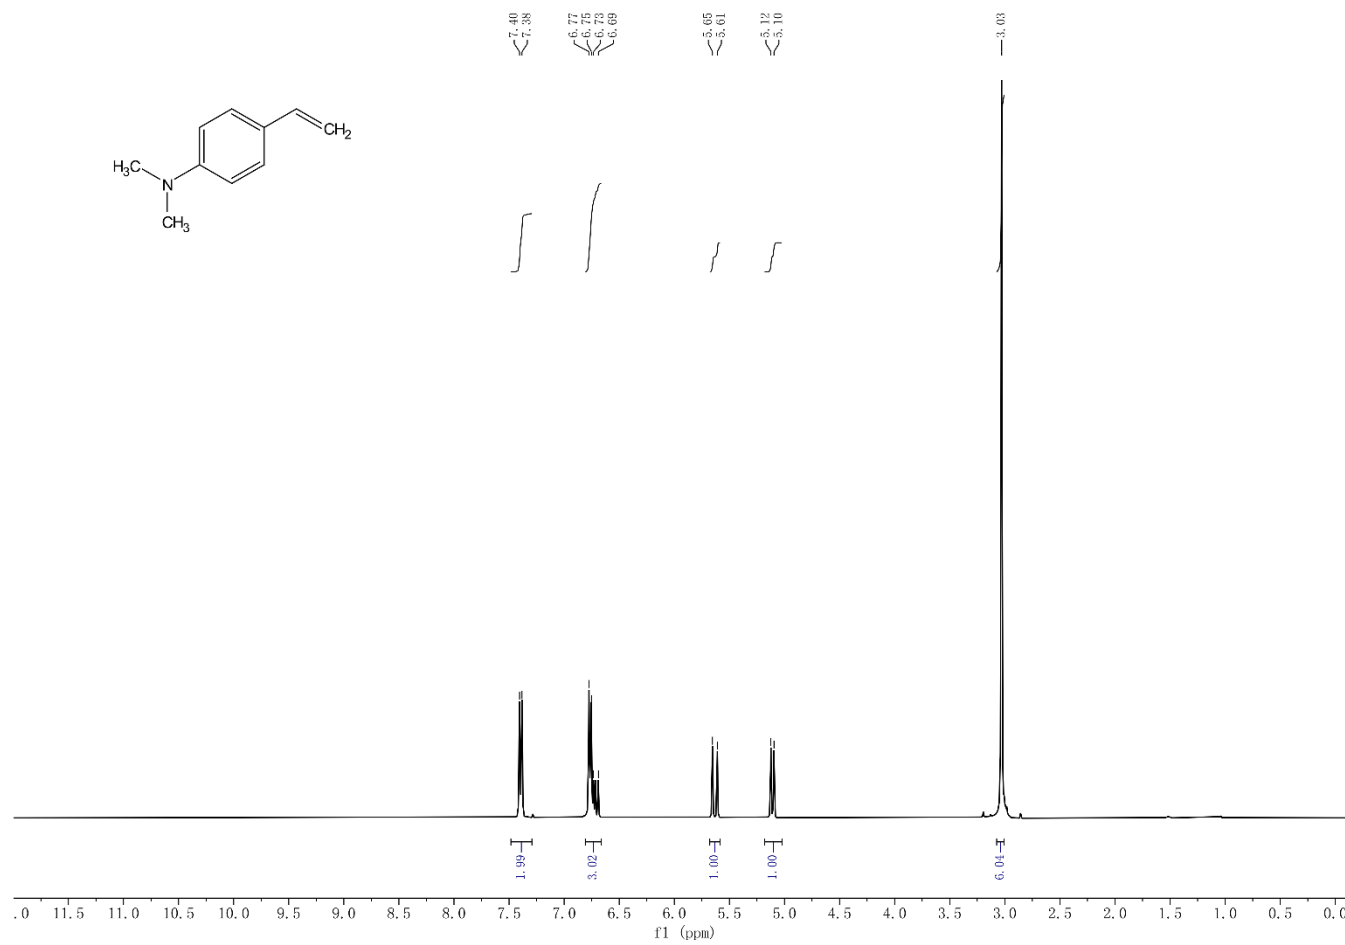

$^{13}\text{C}\{^1\text{H}\}$  NMR (101 MHz,  $\text{CDCl}_3$ ) spectrum of 3d

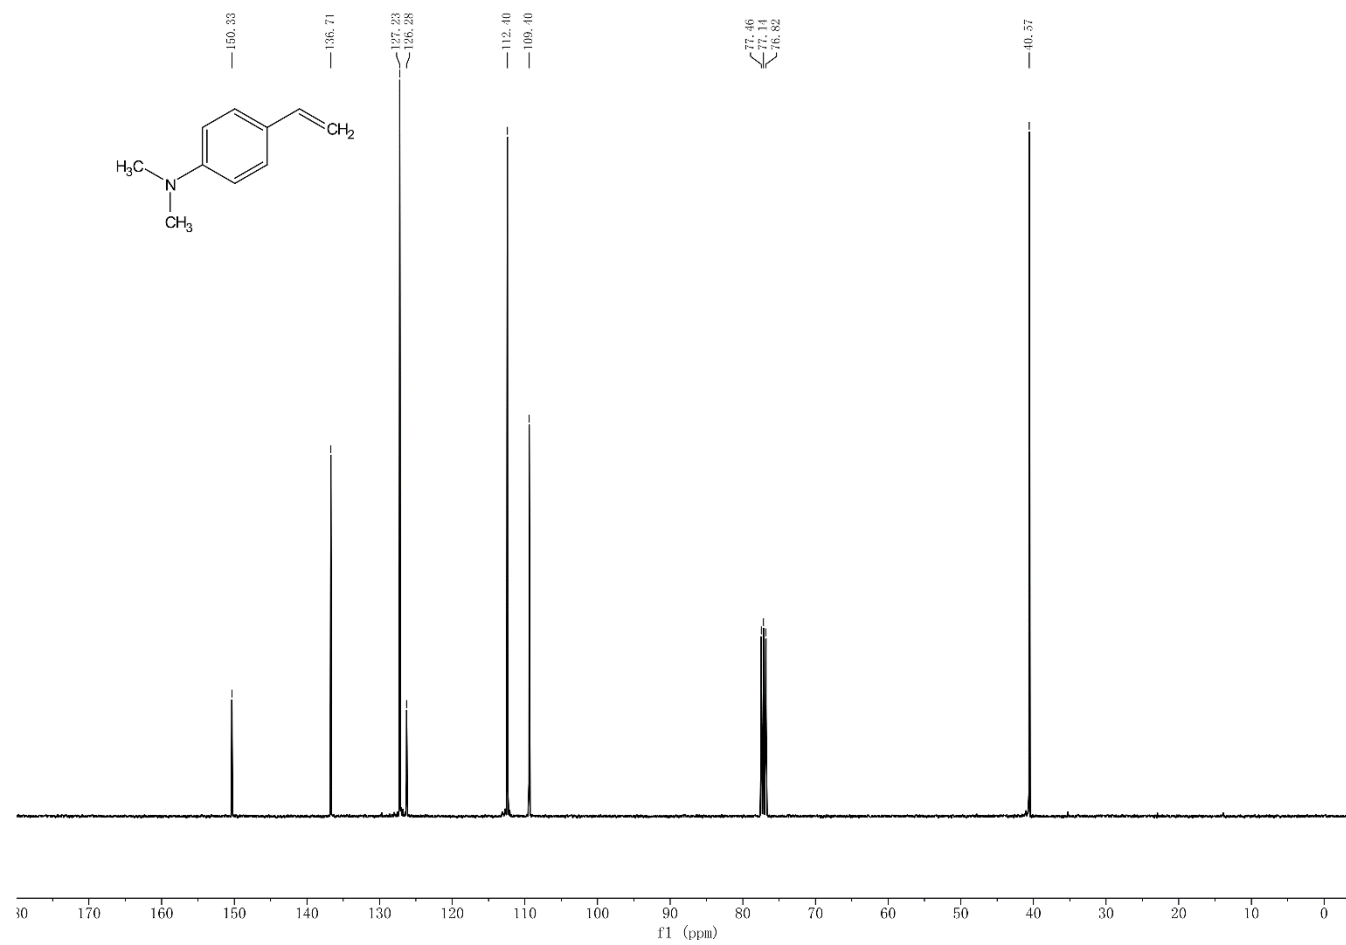

<sup>1</sup>H NMR (400 MHz, CDCl<sub>3</sub>) spectrum of 3e

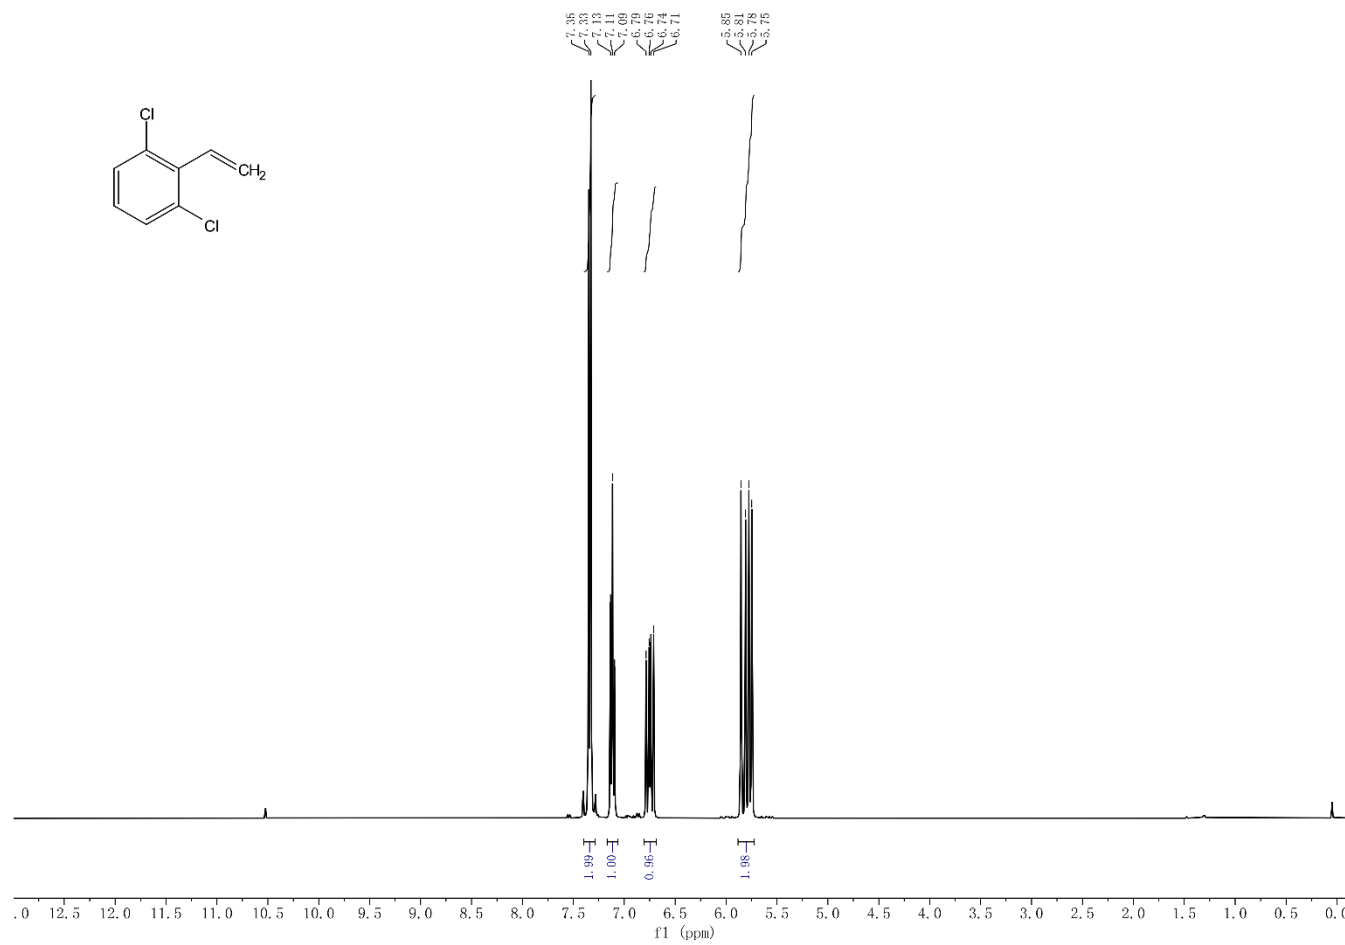

$^{13}\text{C}\{^1\text{H}\}$  NMR (101 MHz,  $\text{CDCl}_3$ ) spectrum of 3e

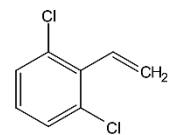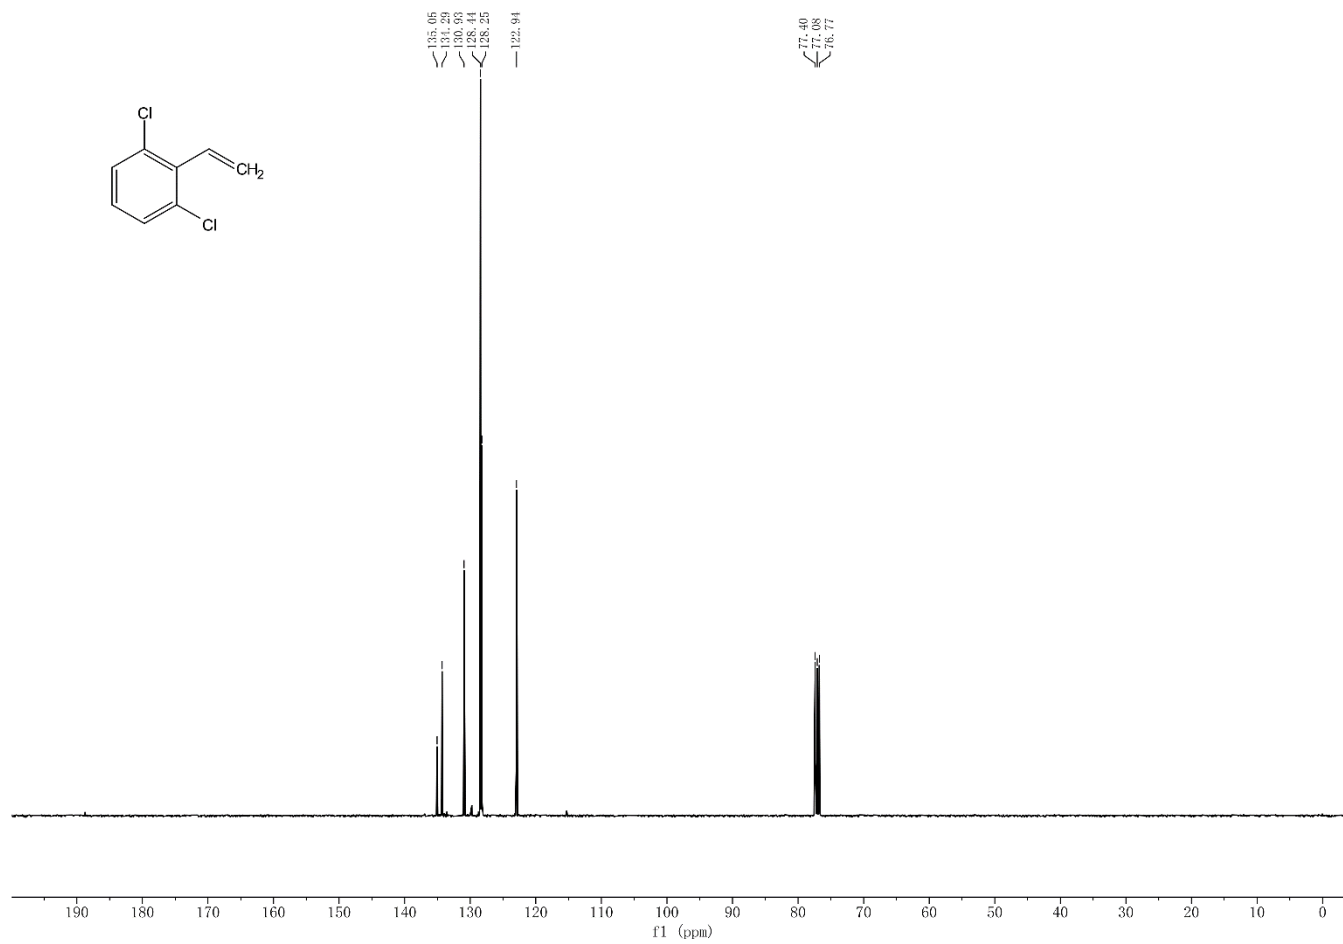



<sup>1</sup>H NMR (400 MHz, CDCl<sub>3</sub>) spectrum of 3f

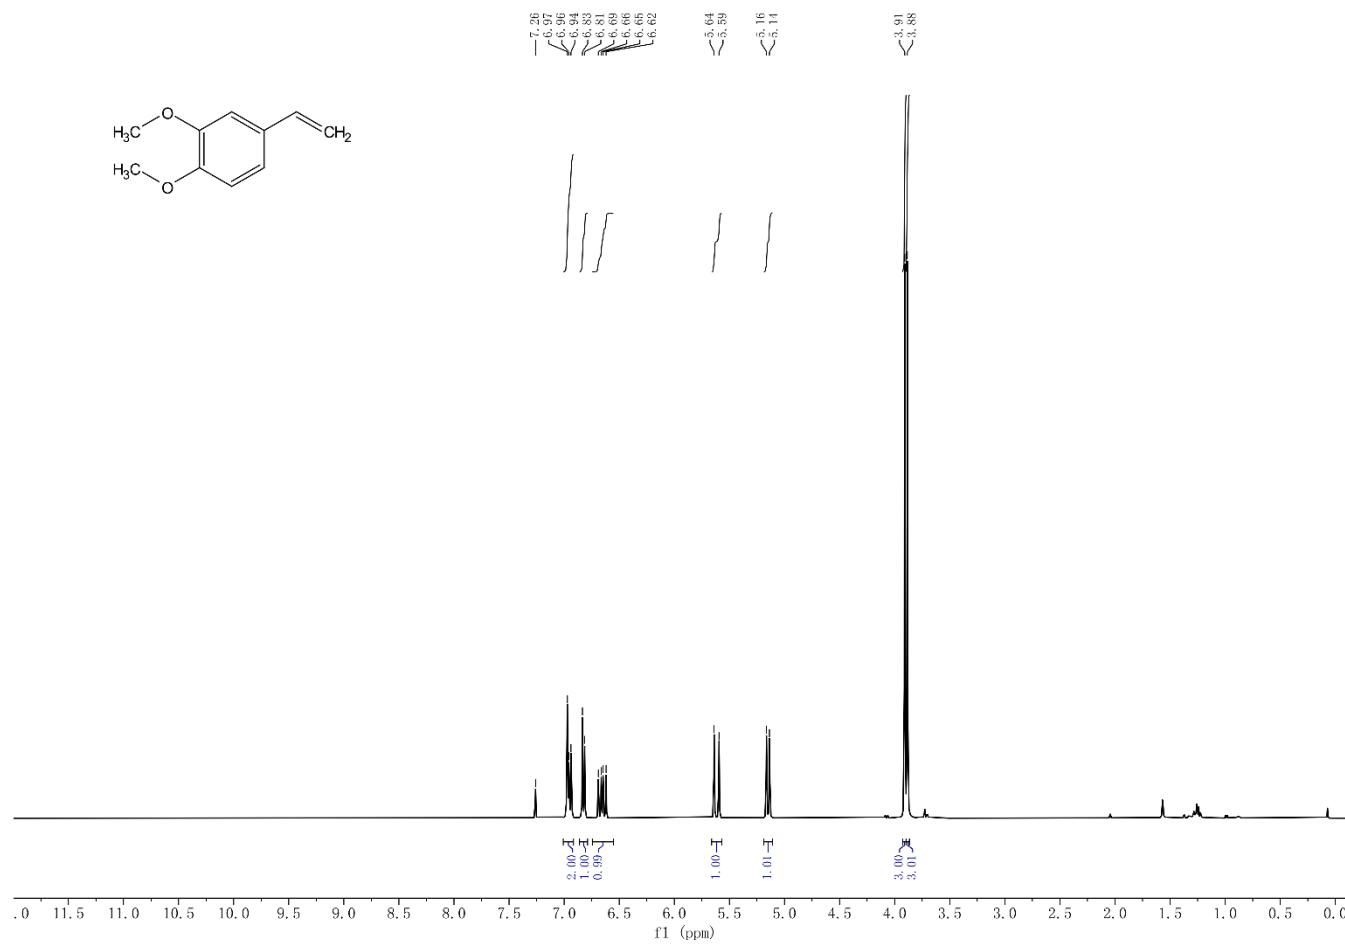

$^{13}\text{C}\{^1\text{H}\}$  NMR (101 MHz,  $\text{CDCl}_3$ ) spectrum of 3f

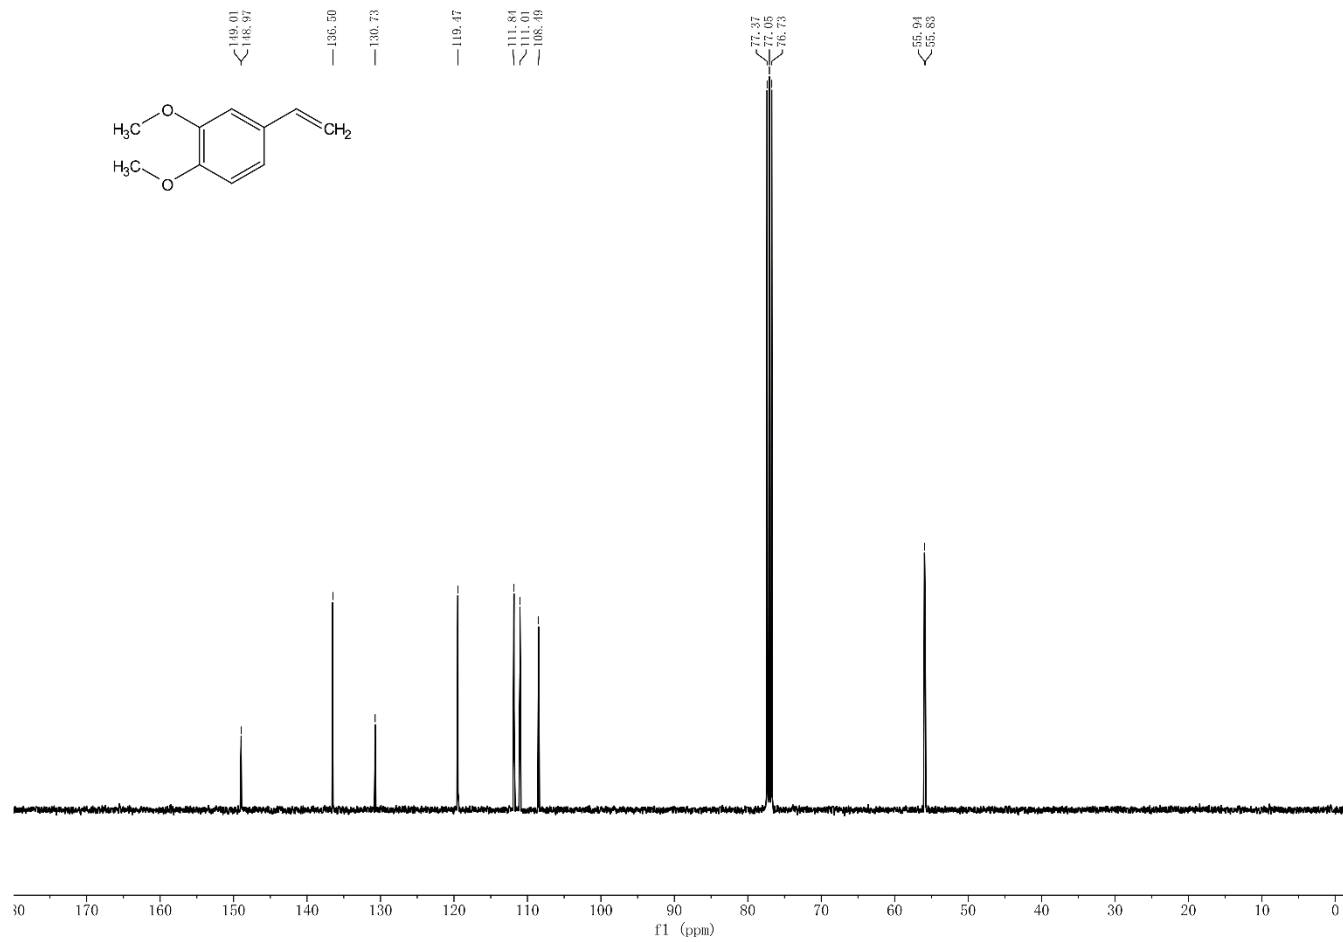

<sup>1</sup>H NMR (400 MHz, CDCl<sub>3</sub>) spectrum of 3g

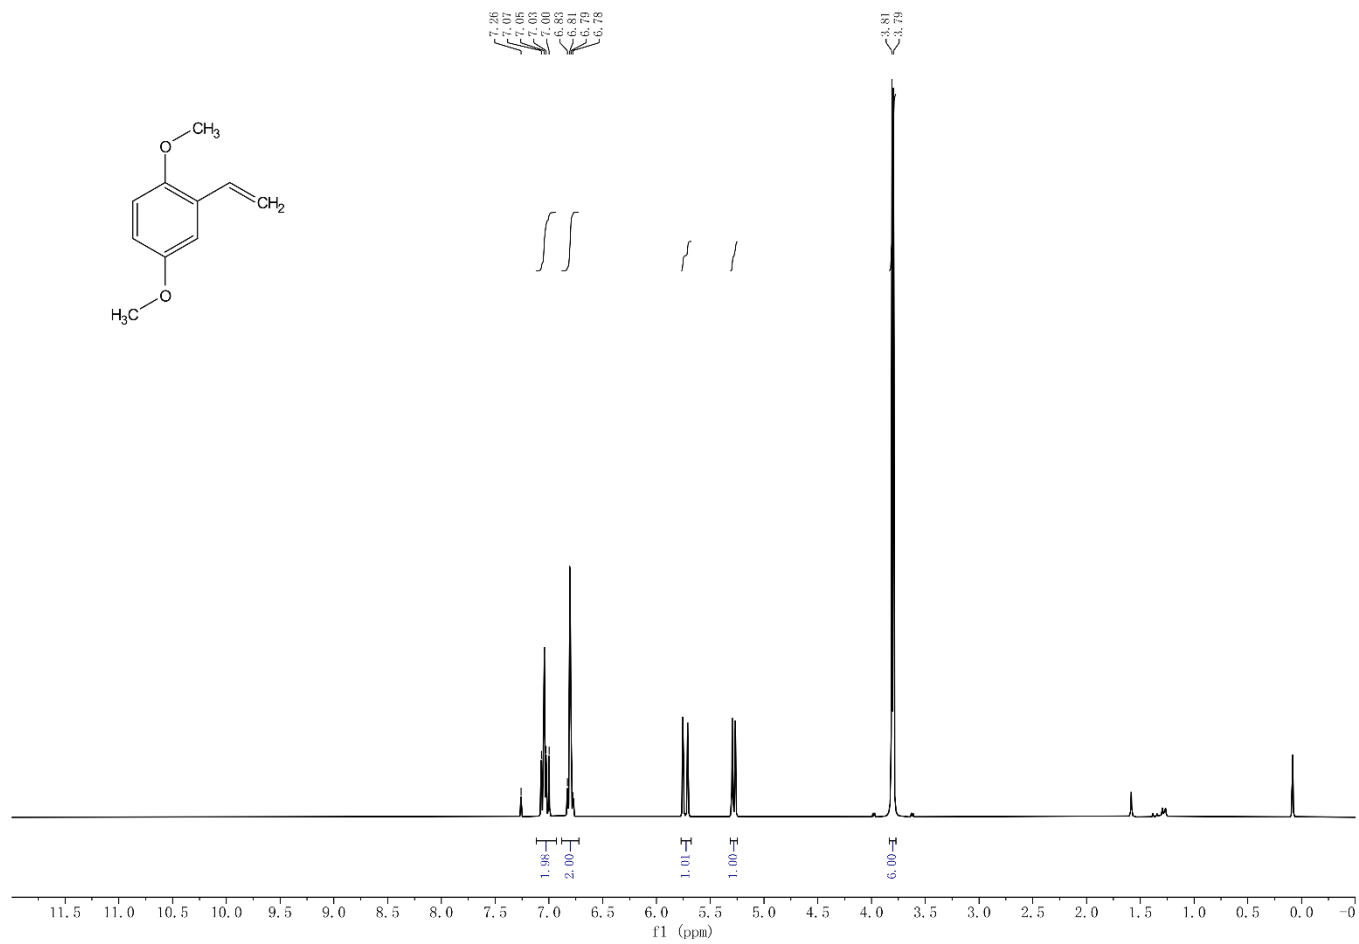

$^{13}\text{C}\{^1\text{H}\}$  NMR (101 MHz,  $\text{CDCl}_3$ ) spectrum of 3g

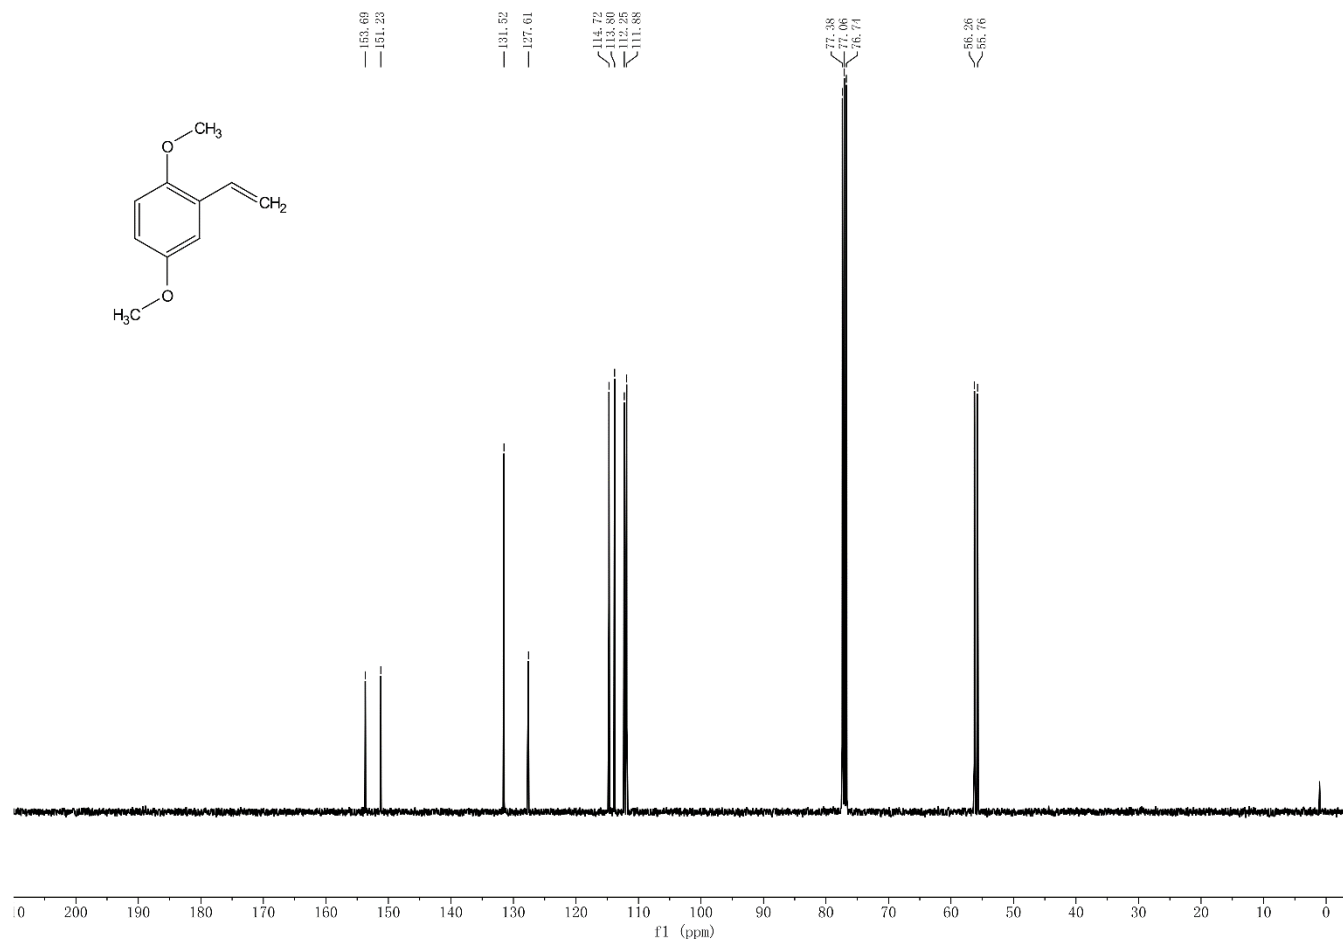

<sup>1</sup>H NMR (400 MHz, CDCl<sub>3</sub>) spectrum of 3h

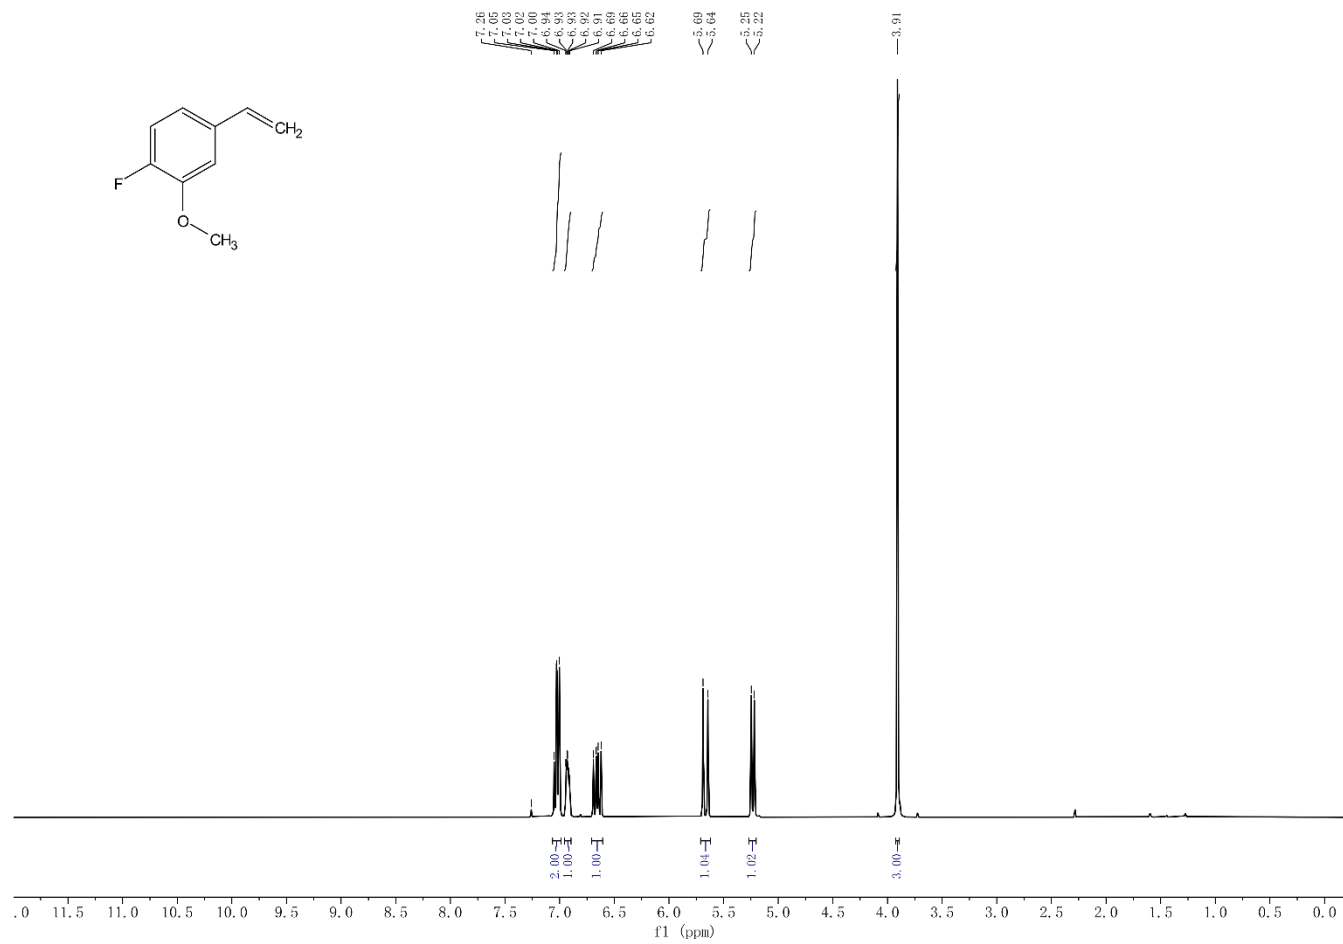

$^{13}\text{C}\{^1\text{H}\}$  NMR (101 MHz,  $\text{CDCl}_3$ ) spectrum of 3h

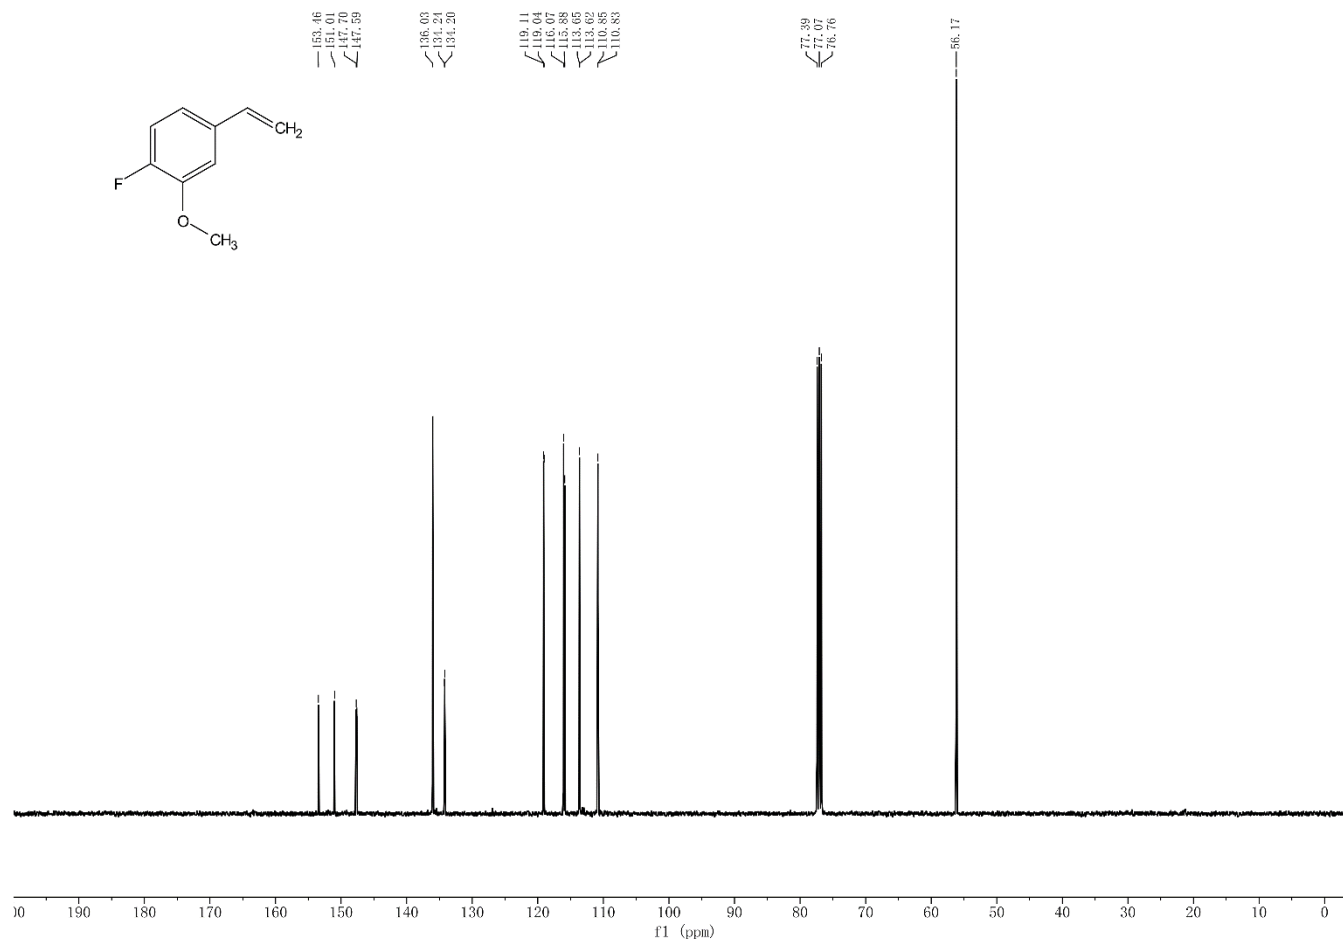

<sup>19</sup>F NMR (377 MHz, CDCl<sub>3</sub>) spectrum of 3h

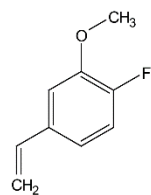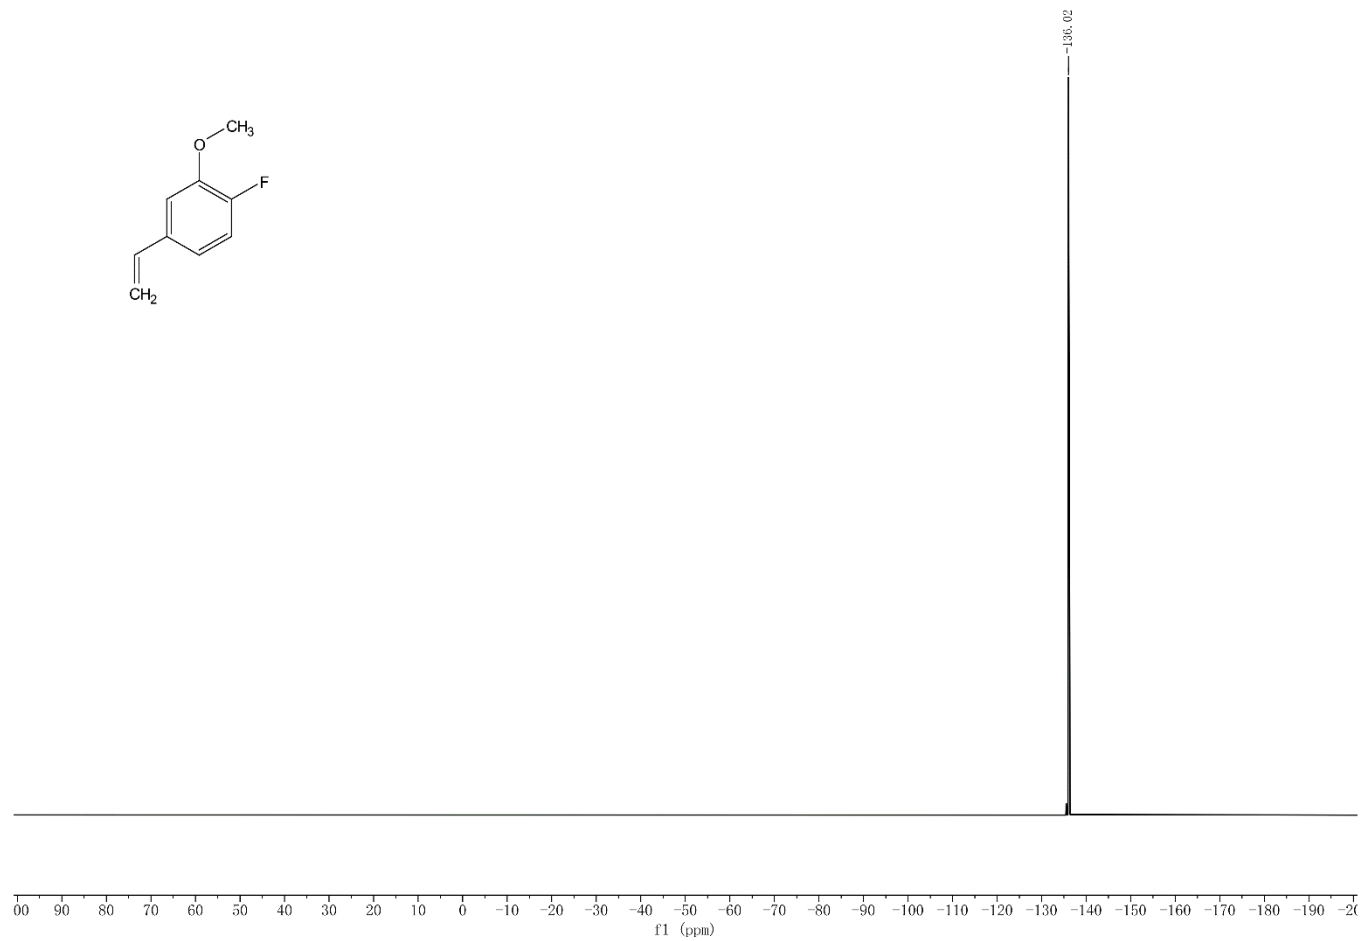

$^1\text{H}$  NMR (400 MHz,  $\text{CDCl}_3$ ) spectrum of 3i

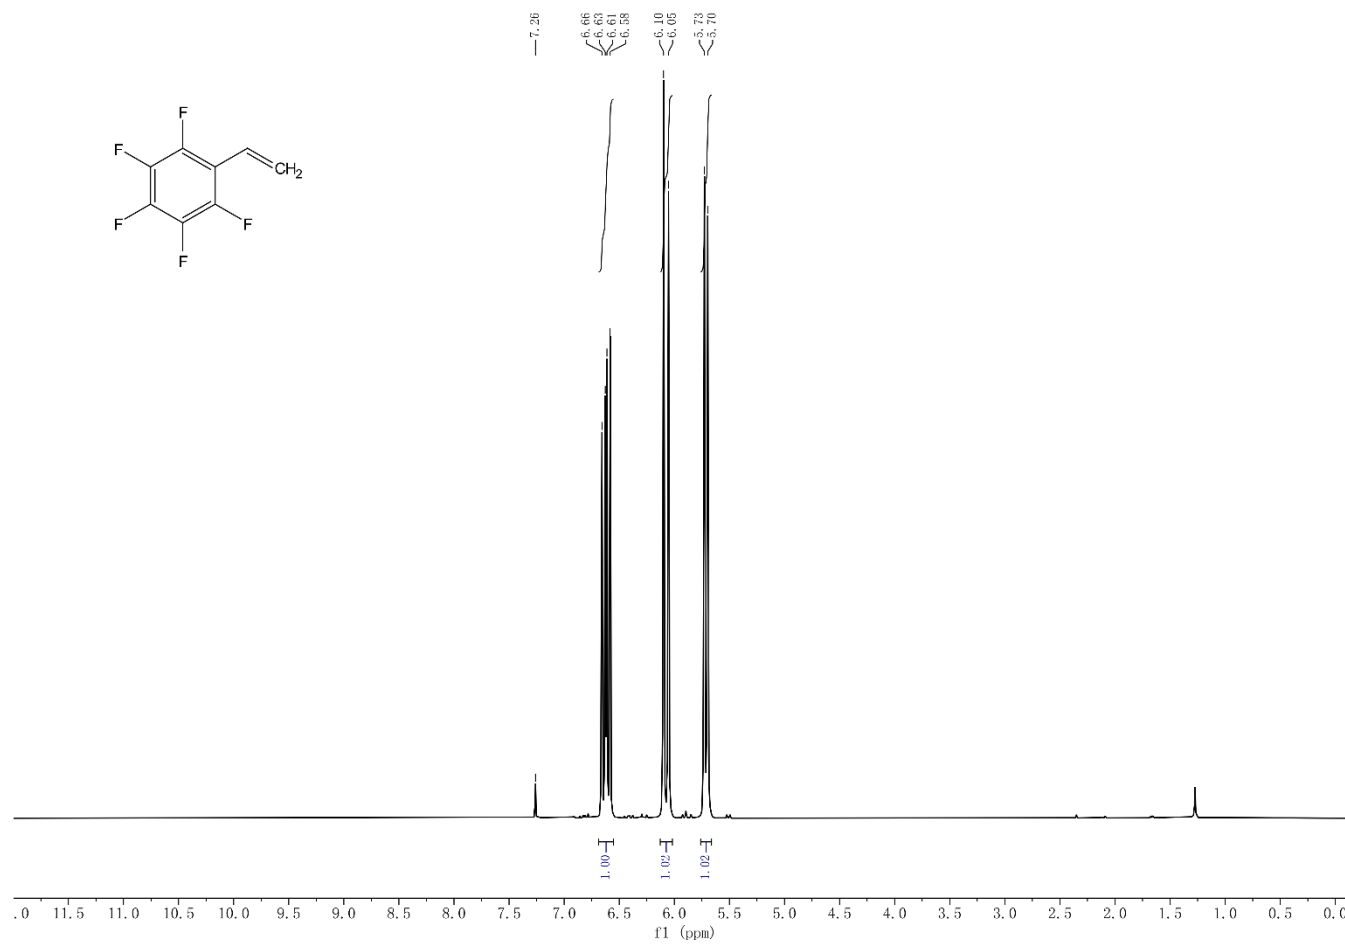



$^{13}\text{C}\{^1\text{H}\}$  NMR (101 MHz,  $\text{CDCl}_3$ ) spectrum of 3i

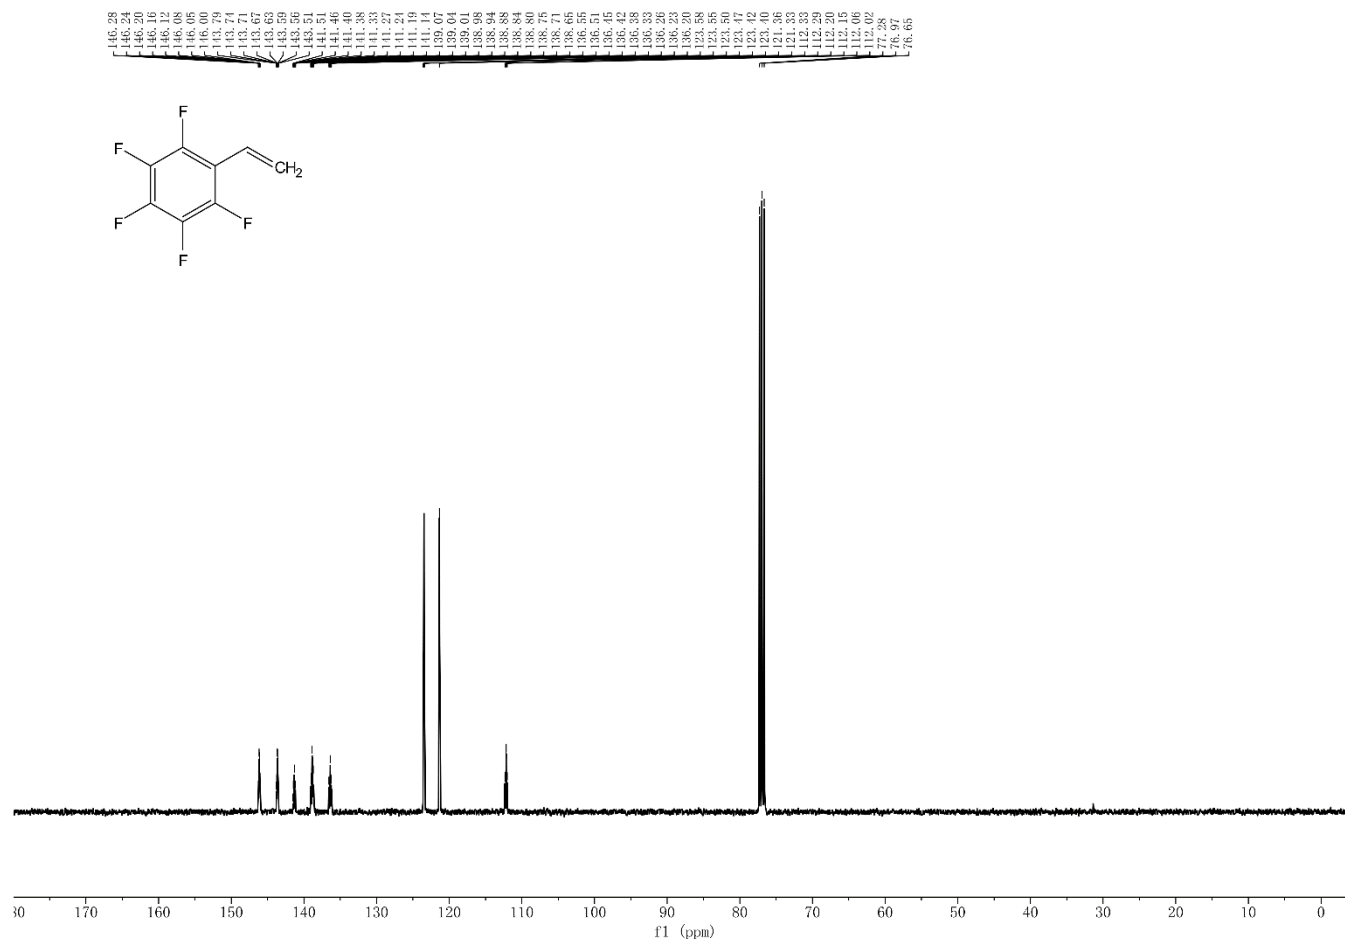

<sup>19</sup>F NMR (377 MHz, CDCl<sub>3</sub>) spectrum of 3i

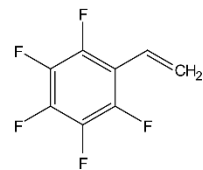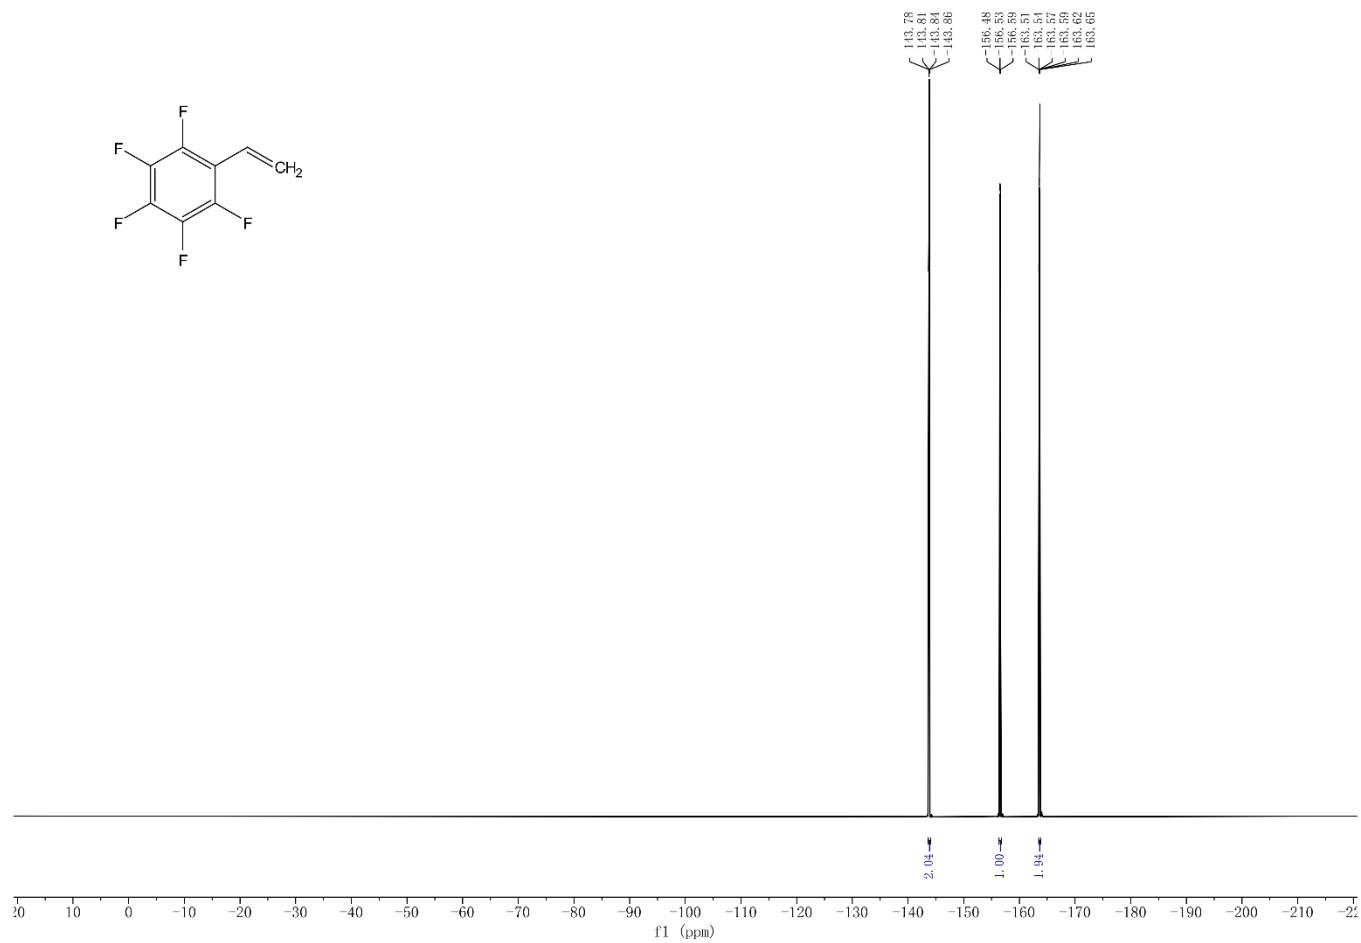

<sup>1</sup>H NMR (400 MHz, CDCl<sub>3</sub>) spectrum of 3j

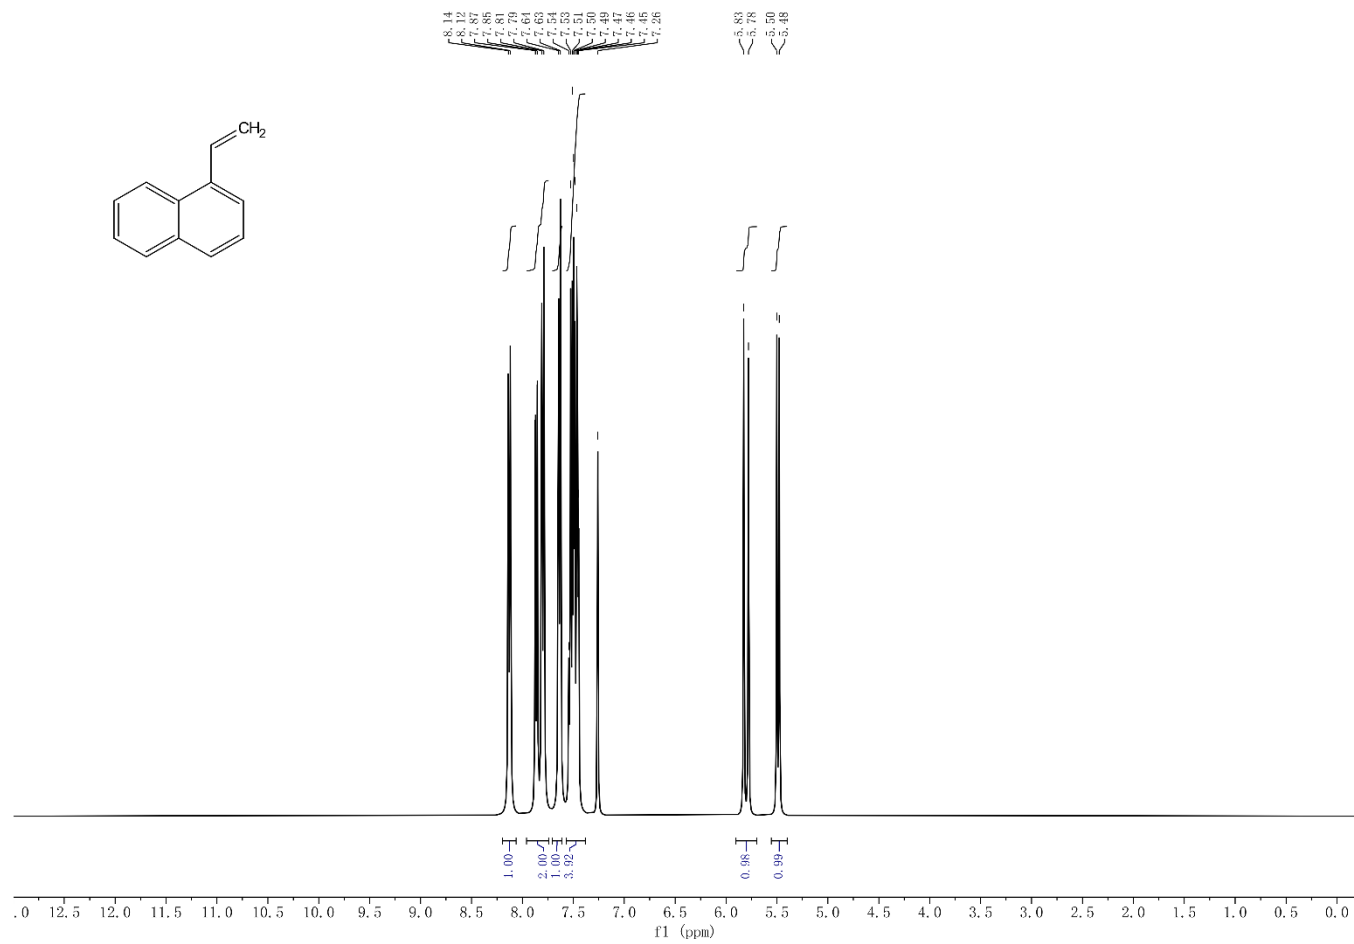

$^{13}\text{C}\{^1\text{H}\}$  NMR (101 MHz,  $\text{CDCl}_3$ ) spectrum of 3j

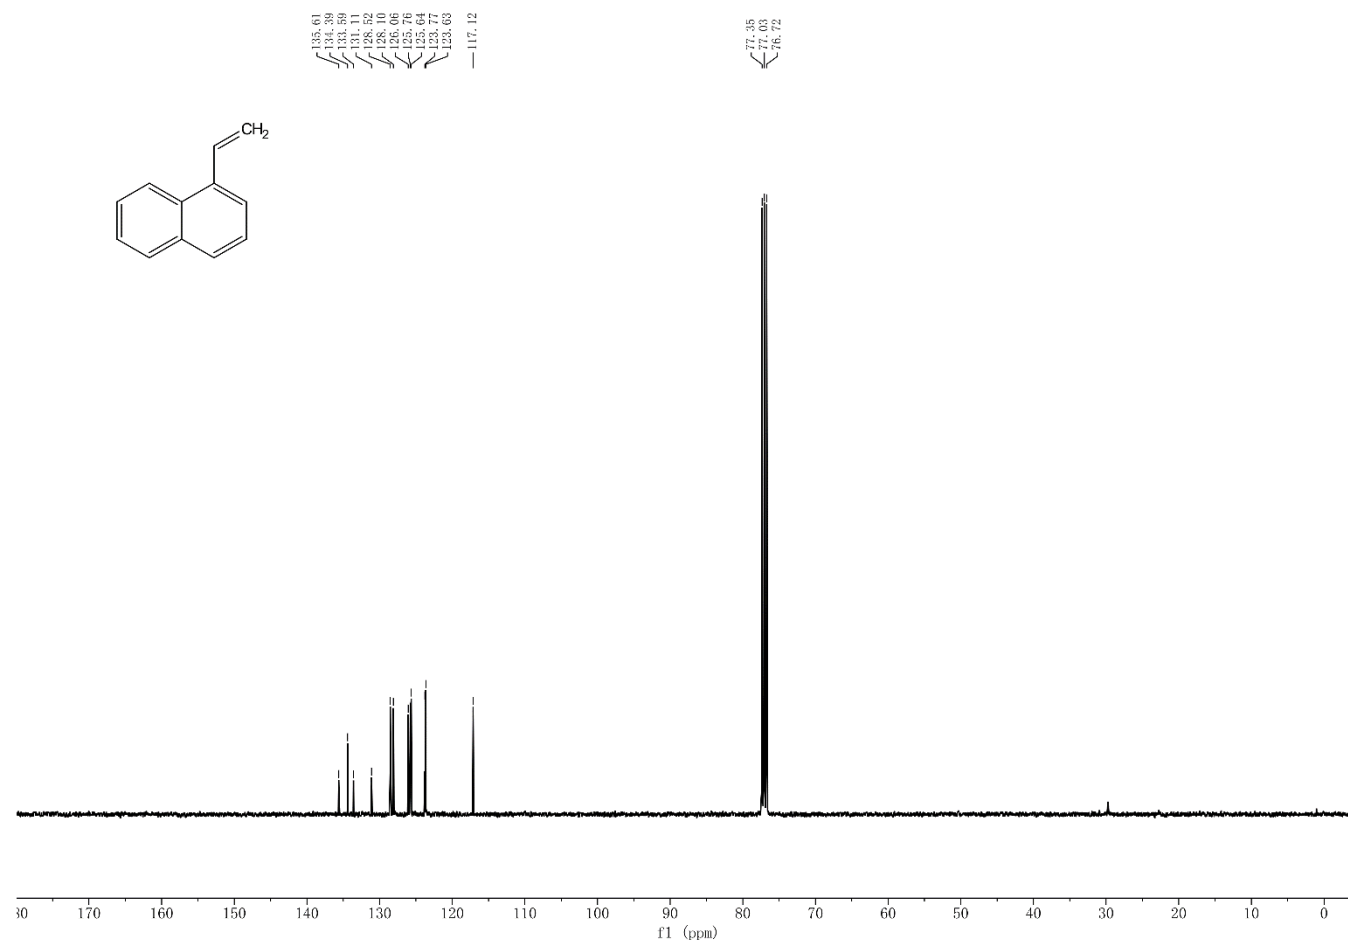

<sup>1</sup>H NMR (400 MHz, CDCl<sub>3</sub>) spectrum of 3k

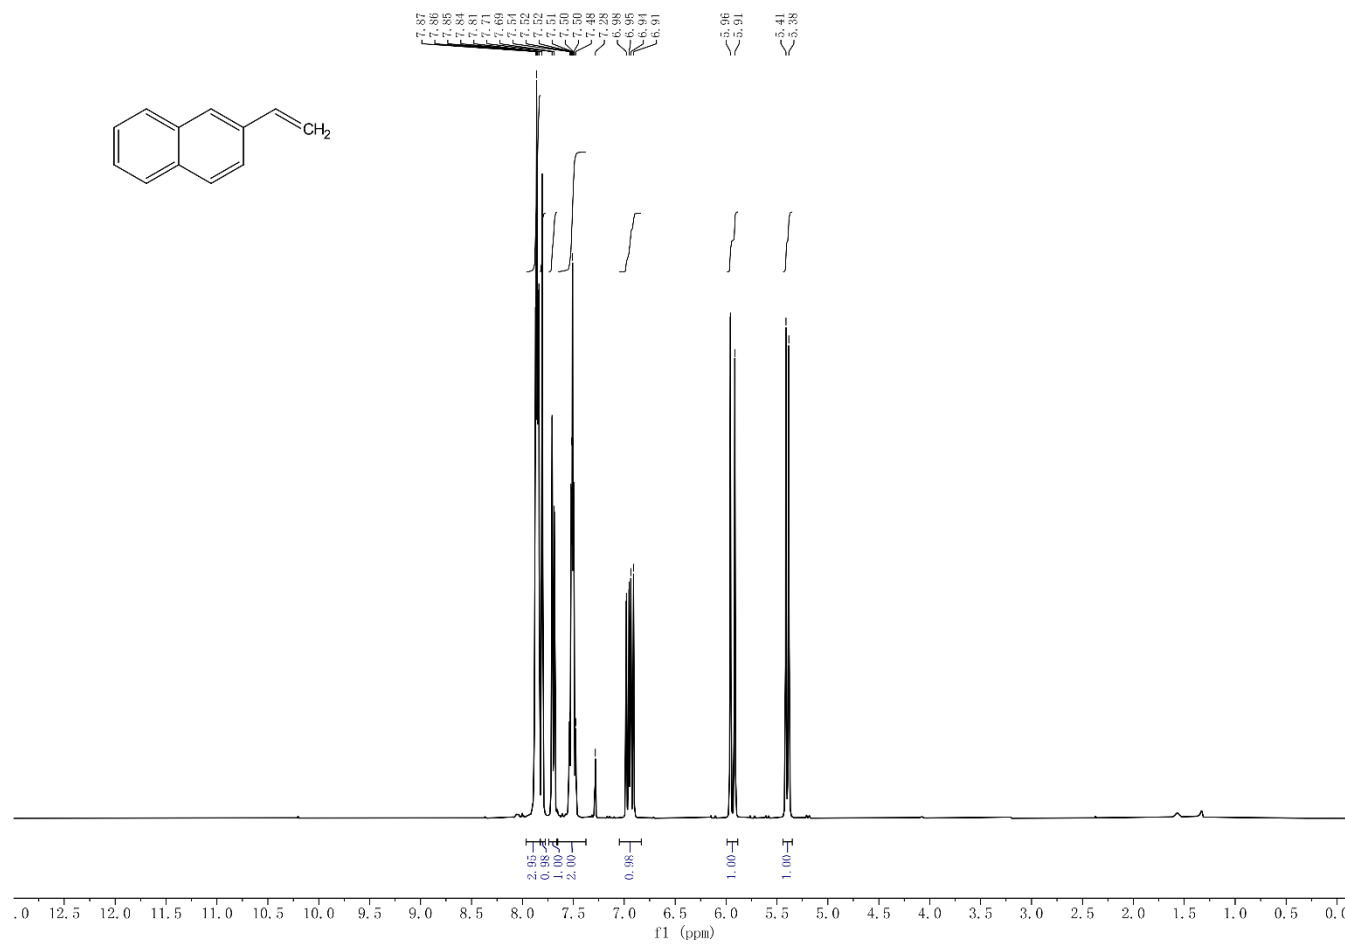

$^{13}\text{C}\{^1\text{H}\}$  NMR (101 MHz,  $\text{CDCl}_3$ ) spectrum of 3k

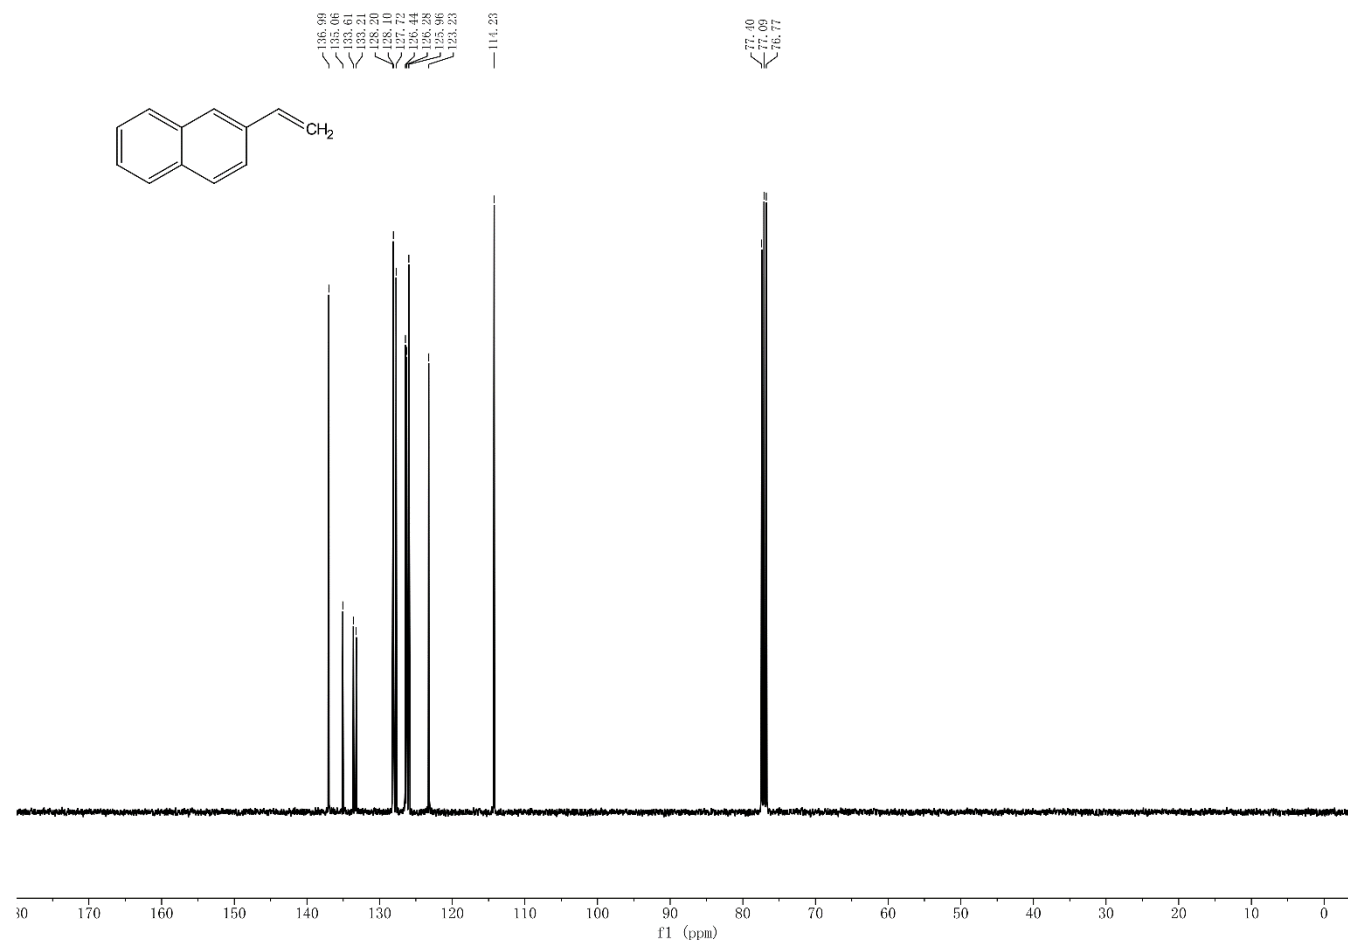

<sup>1</sup>H NMR (400 MHz, CDCl<sub>3</sub>) spectrum of 3l

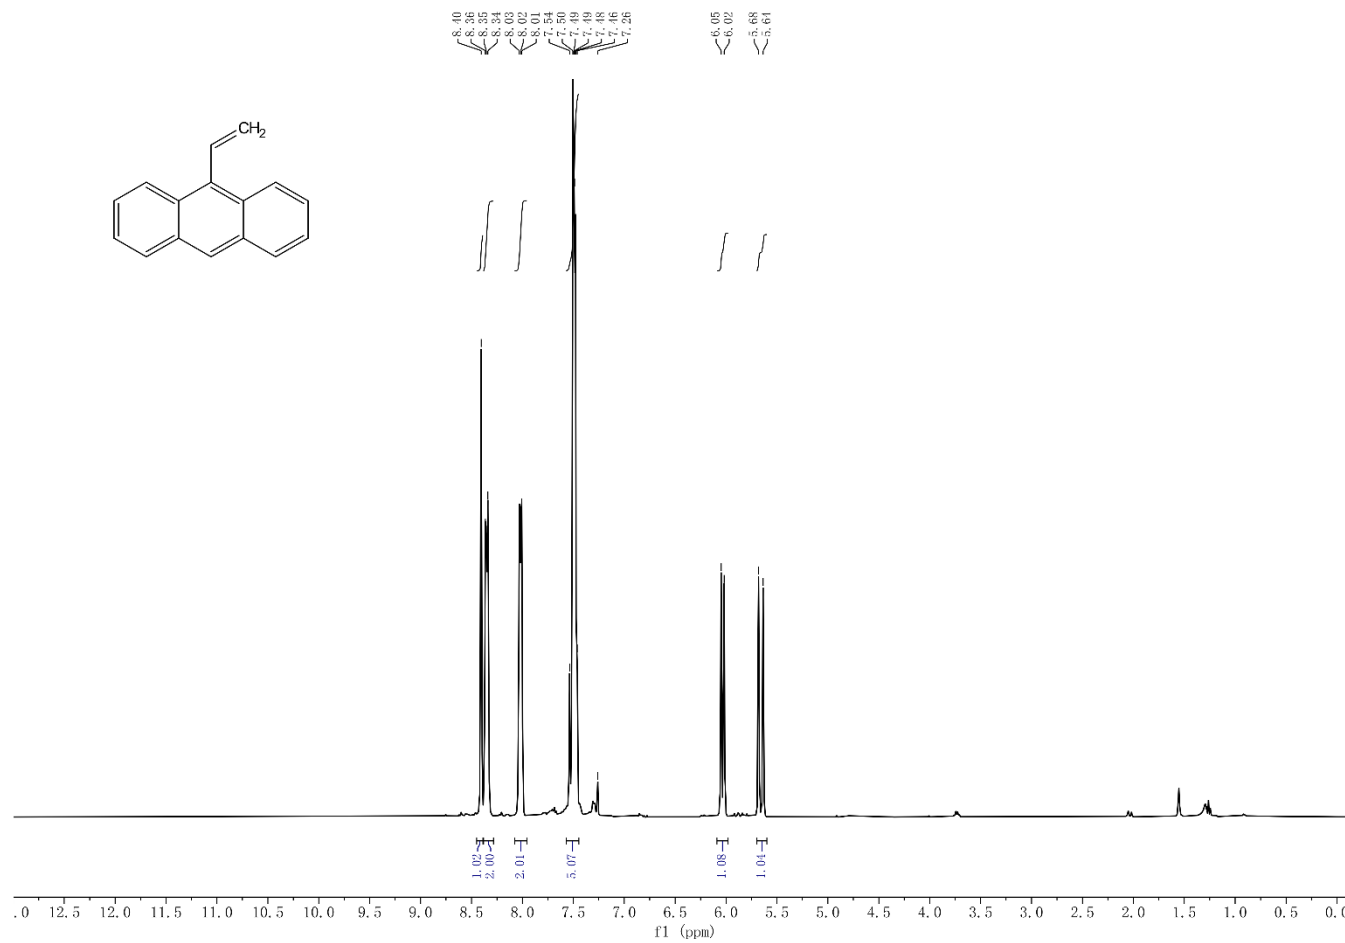

$^{13}\text{C}\{^1\text{H}\}$  NMR (101 MHz,  $\text{CDCl}_3$ ) spectrum of 3l

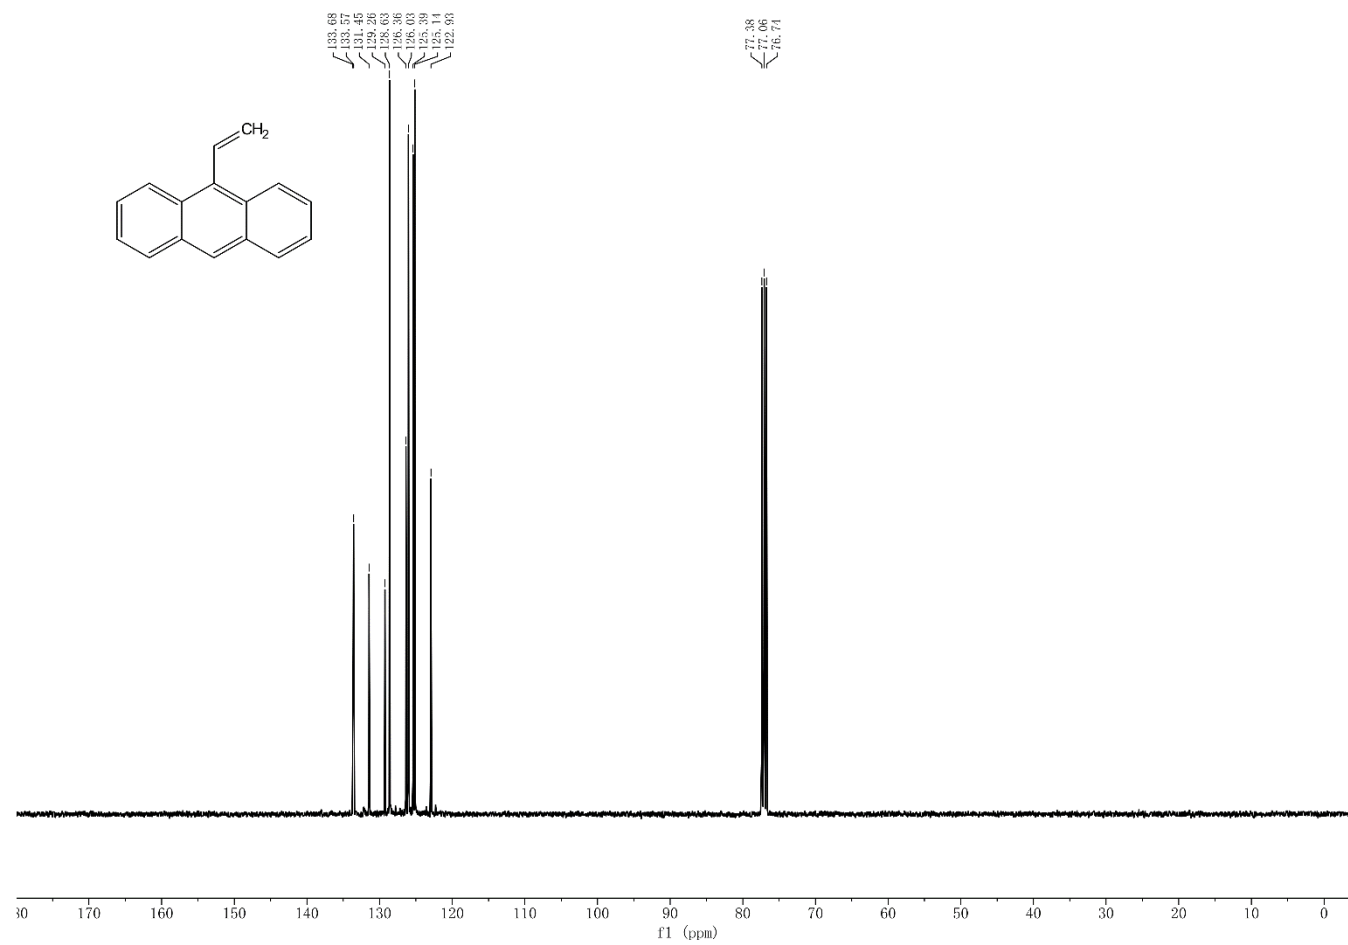



<sup>1</sup>H NMR (400 MHz, CDCl<sub>3</sub>) spectrum of 3m

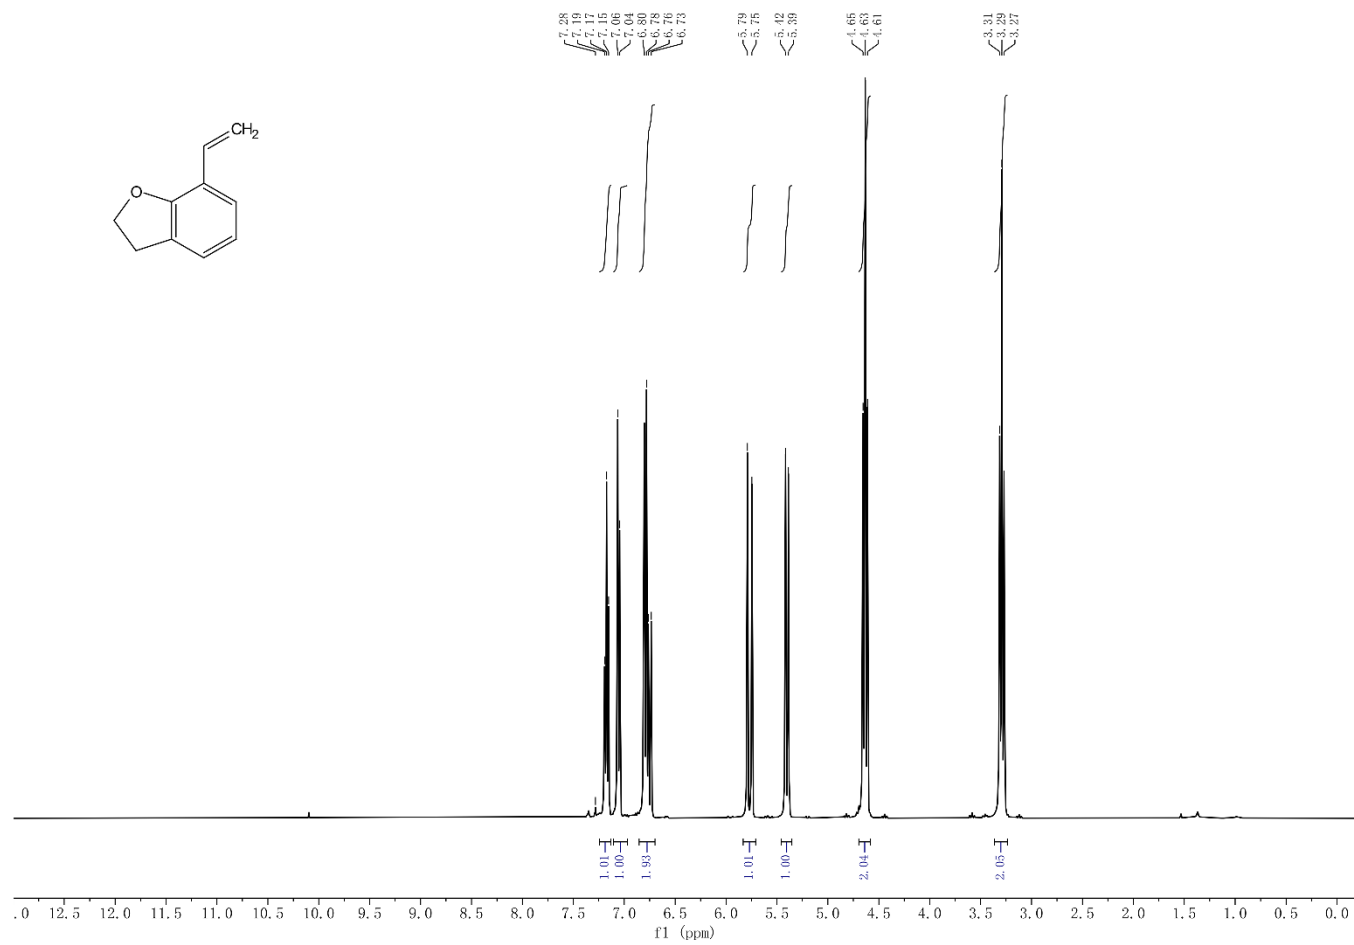

$^{13}\text{C}\{^1\text{H}\}$  NMR (101 MHz,  $\text{CDCl}_3$ ) spectrum of 3m

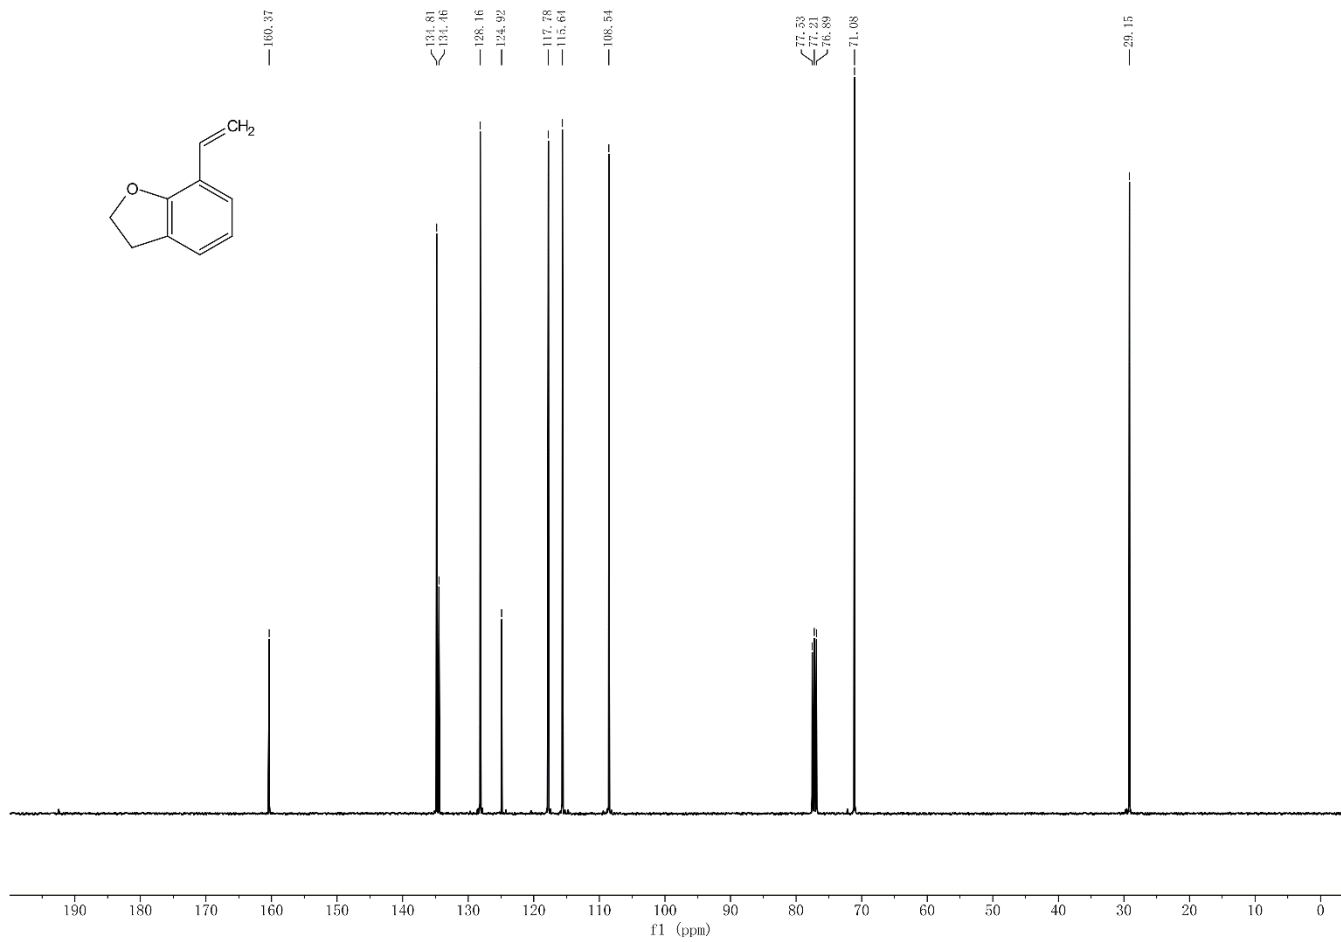

<sup>1</sup>H NMR (400 MHz, CDCl<sub>3</sub>) spectrum of 3n

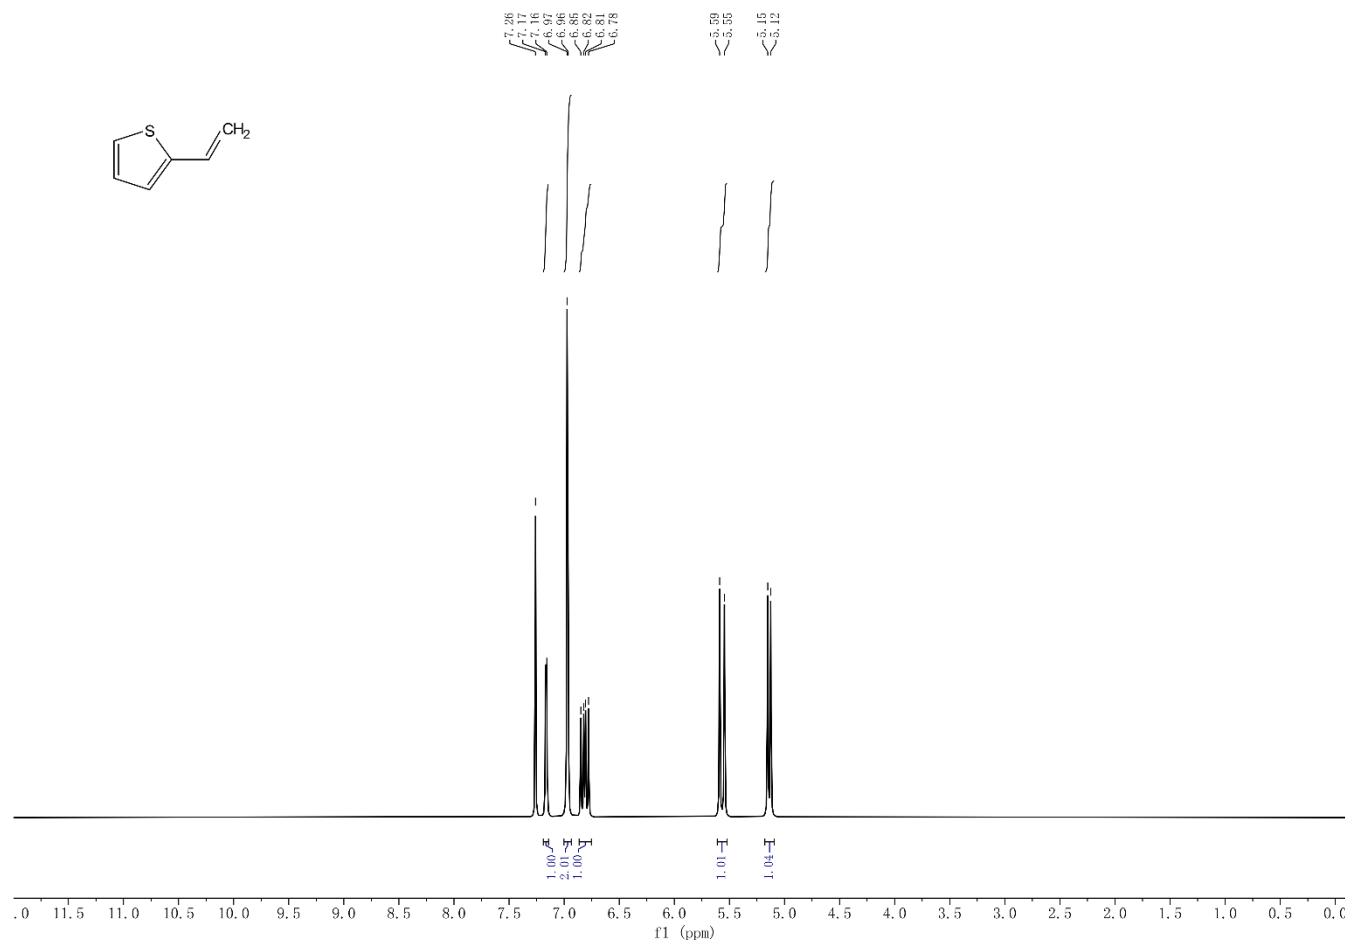

$^{13}\text{C}\{^1\text{H}\}$  NMR (101 MHz,  $\text{CDCl}_3$ ) spectrum of 3n

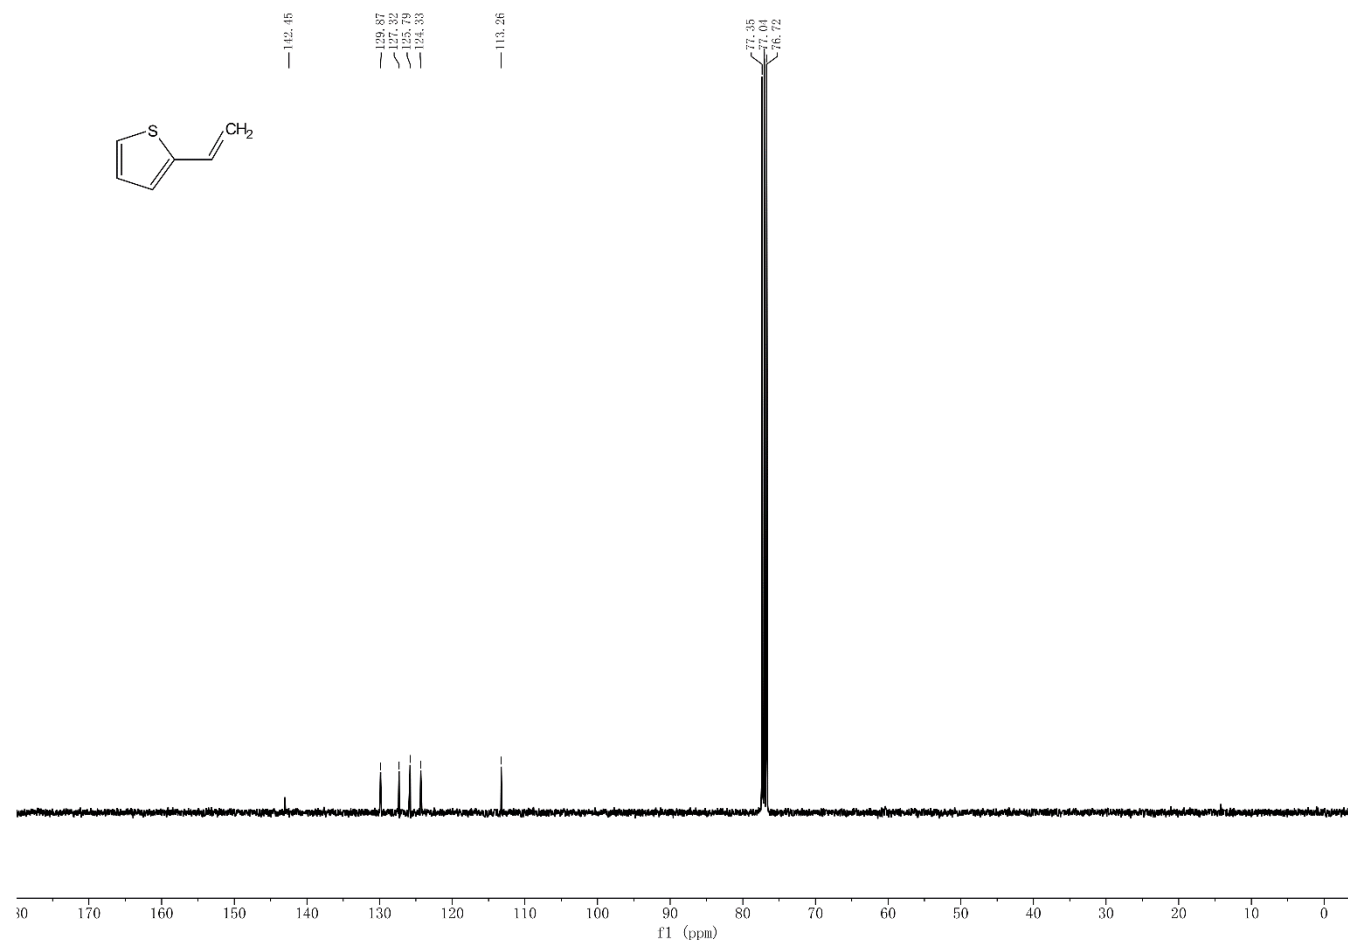

<sup>1</sup>H NMR (400 MHz, CDCl<sub>3</sub>) spectrum of 3o

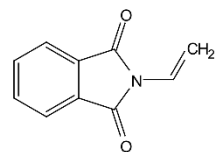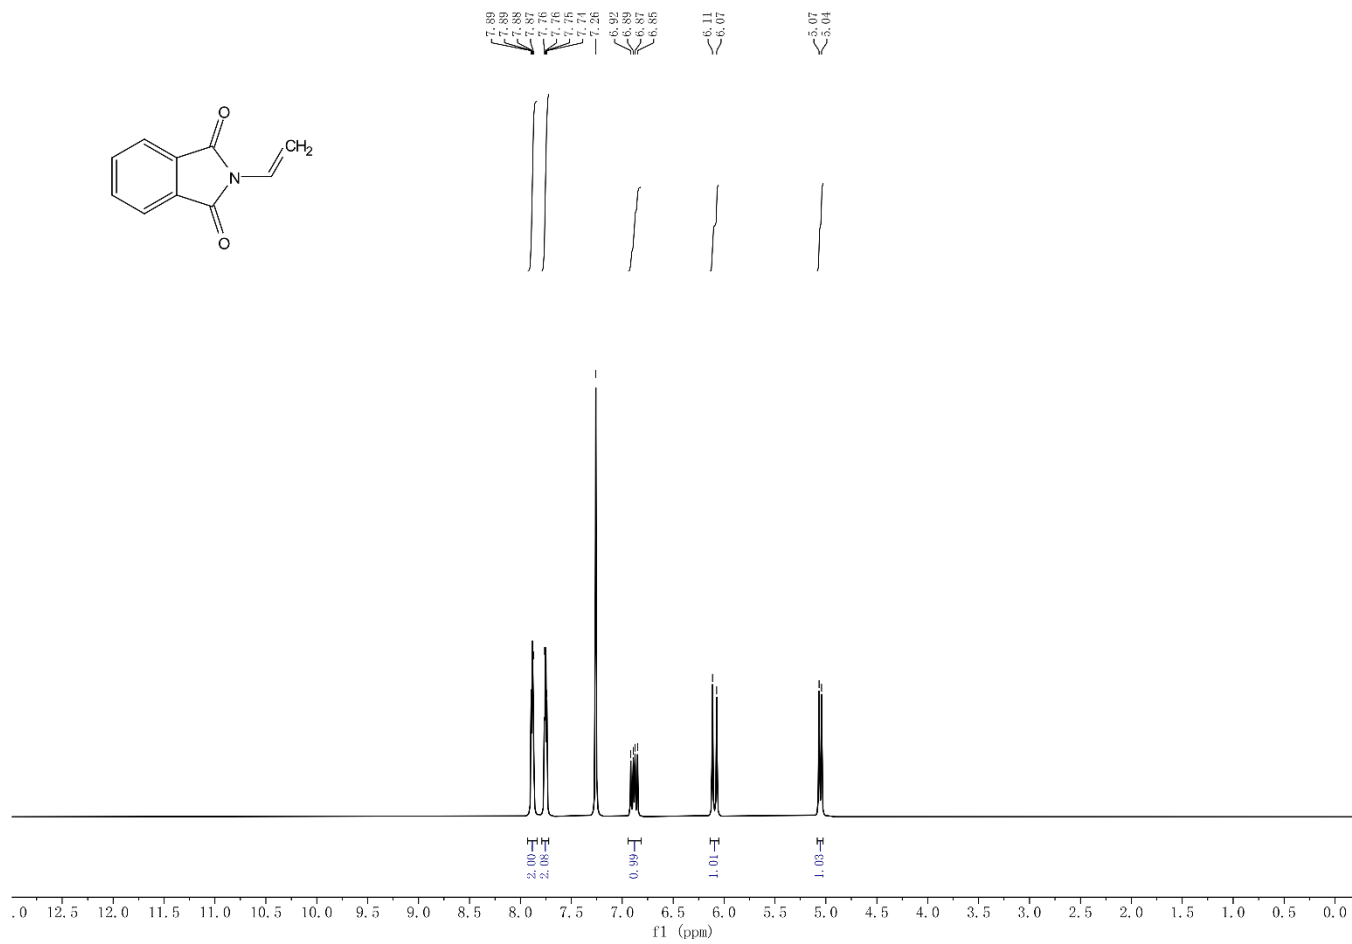

$^{13}\text{C}\{^1\text{H}\}$  NMR (101 MHz,  $\text{CDCl}_3$ ) spectrum of 3o

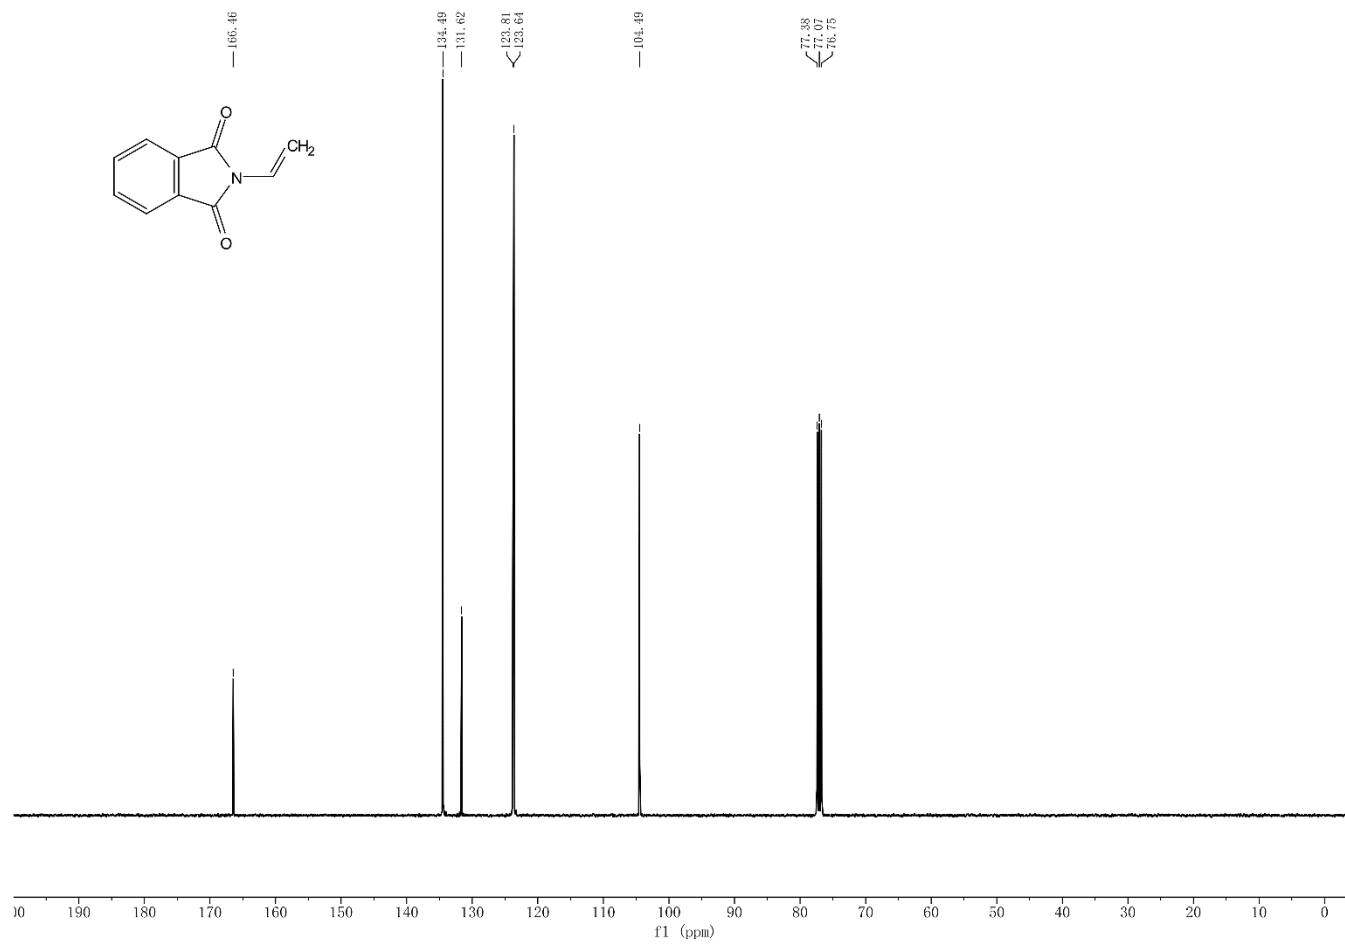

<sup>1</sup>H NMR (400 MHz, CDCl<sub>3</sub>) spectrum of 3p

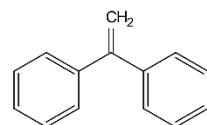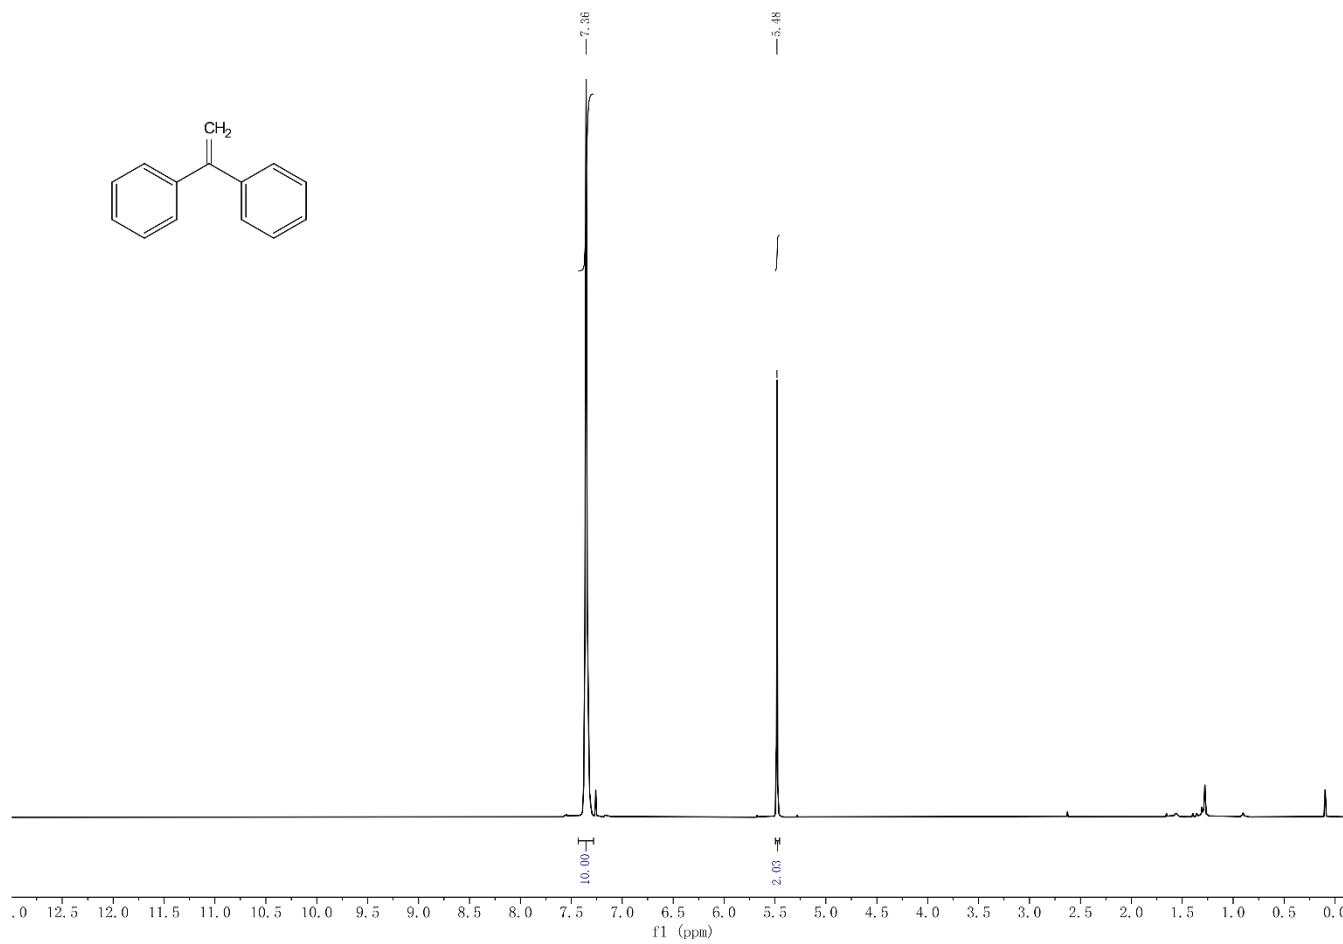

$^{13}\text{C}\{^1\text{H}\}$  NMR (101 MHz,  $\text{CDCl}_3$ ) spectrum of 3p

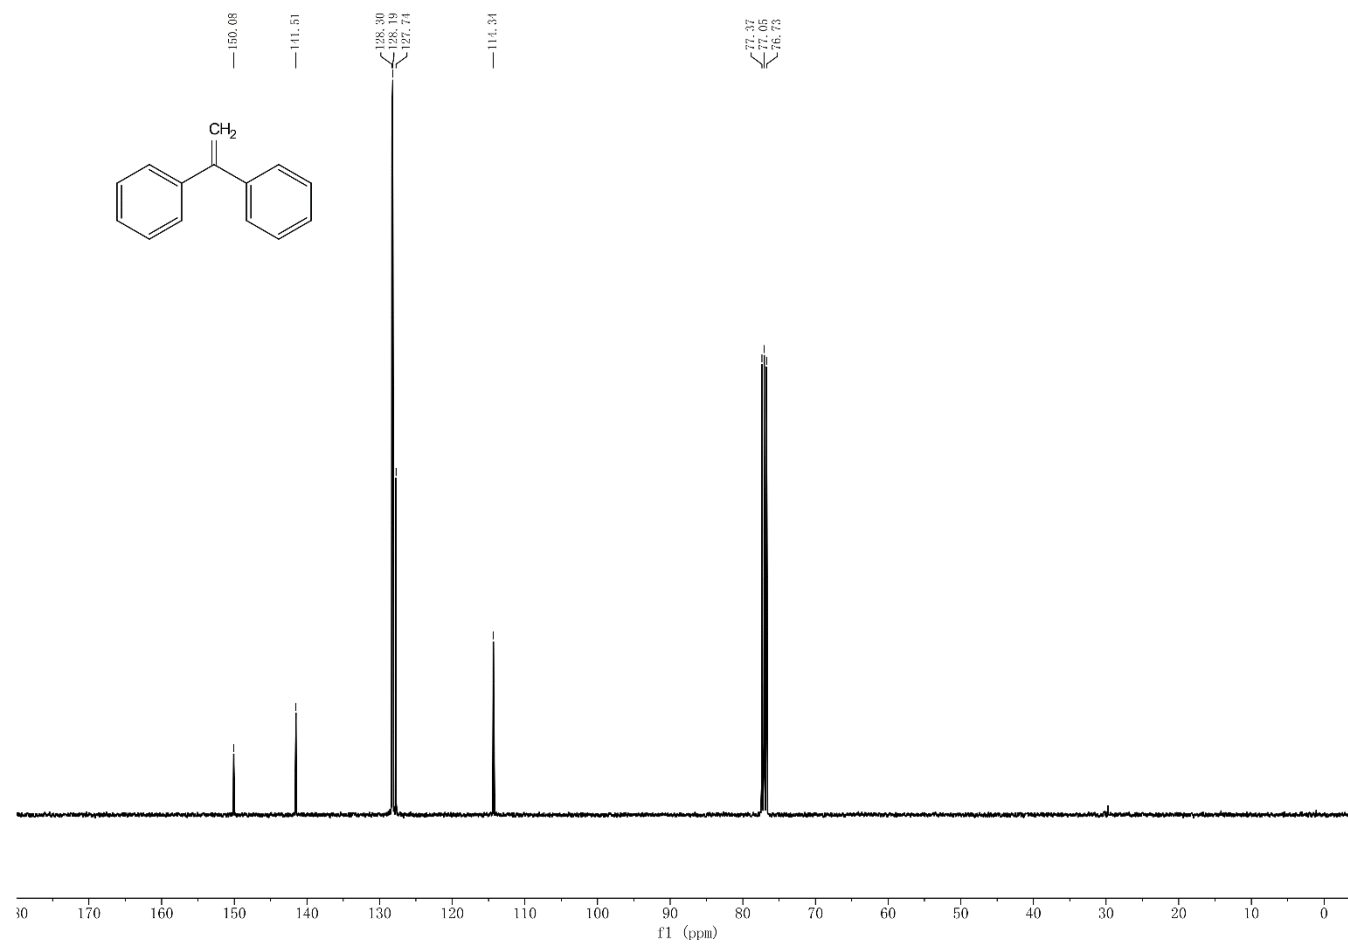



<sup>1</sup>H NMR (400 MHz, CDCl<sub>3</sub>) spectrum of 3q

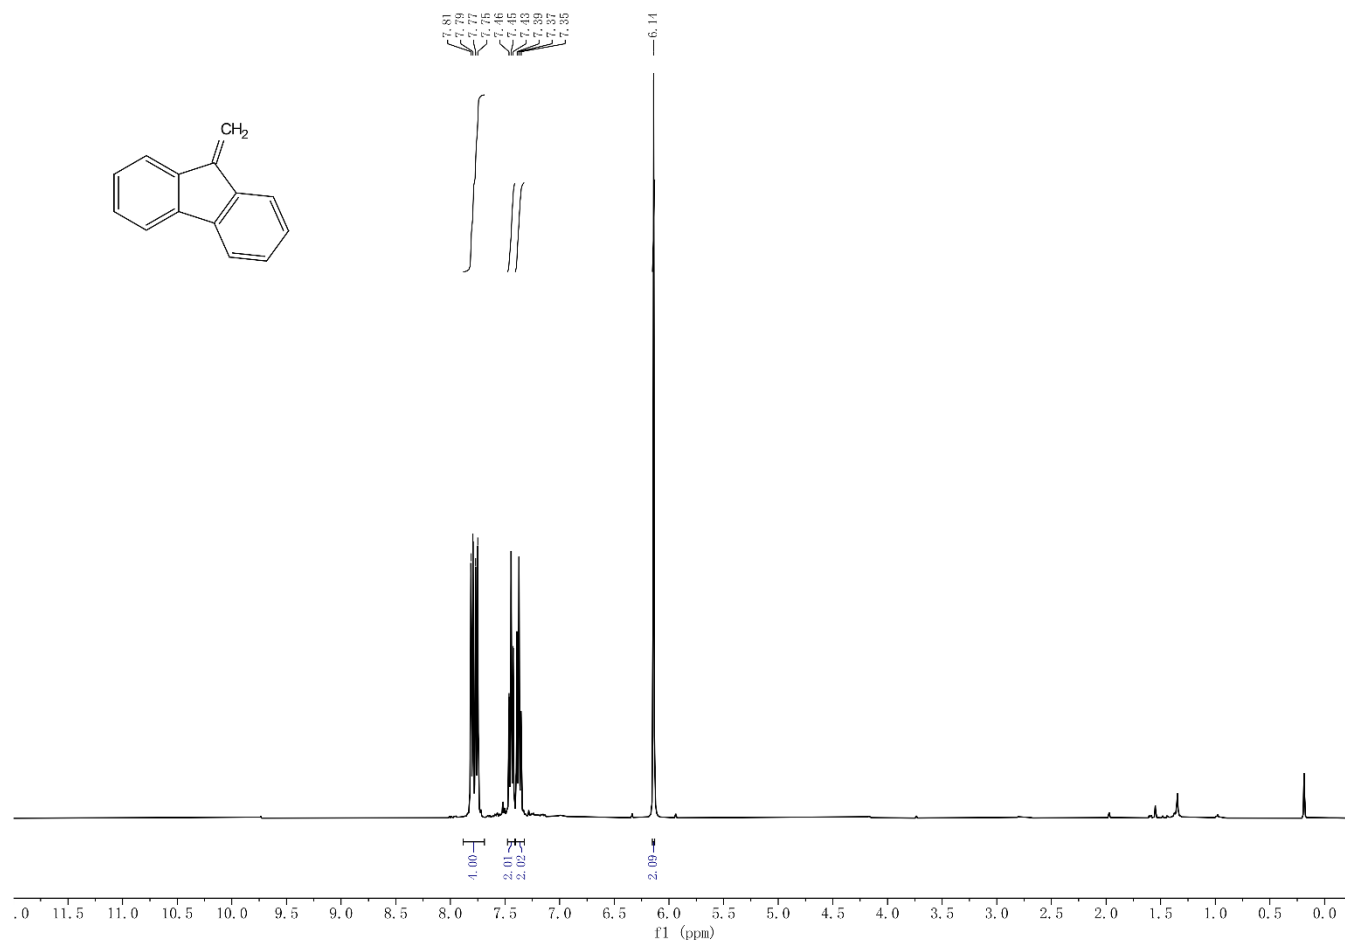

$^{13}\text{C}\{^1\text{H}\}$  NMR (101 MHz,  $\text{CDCl}_3$ ) spectrum of 3q

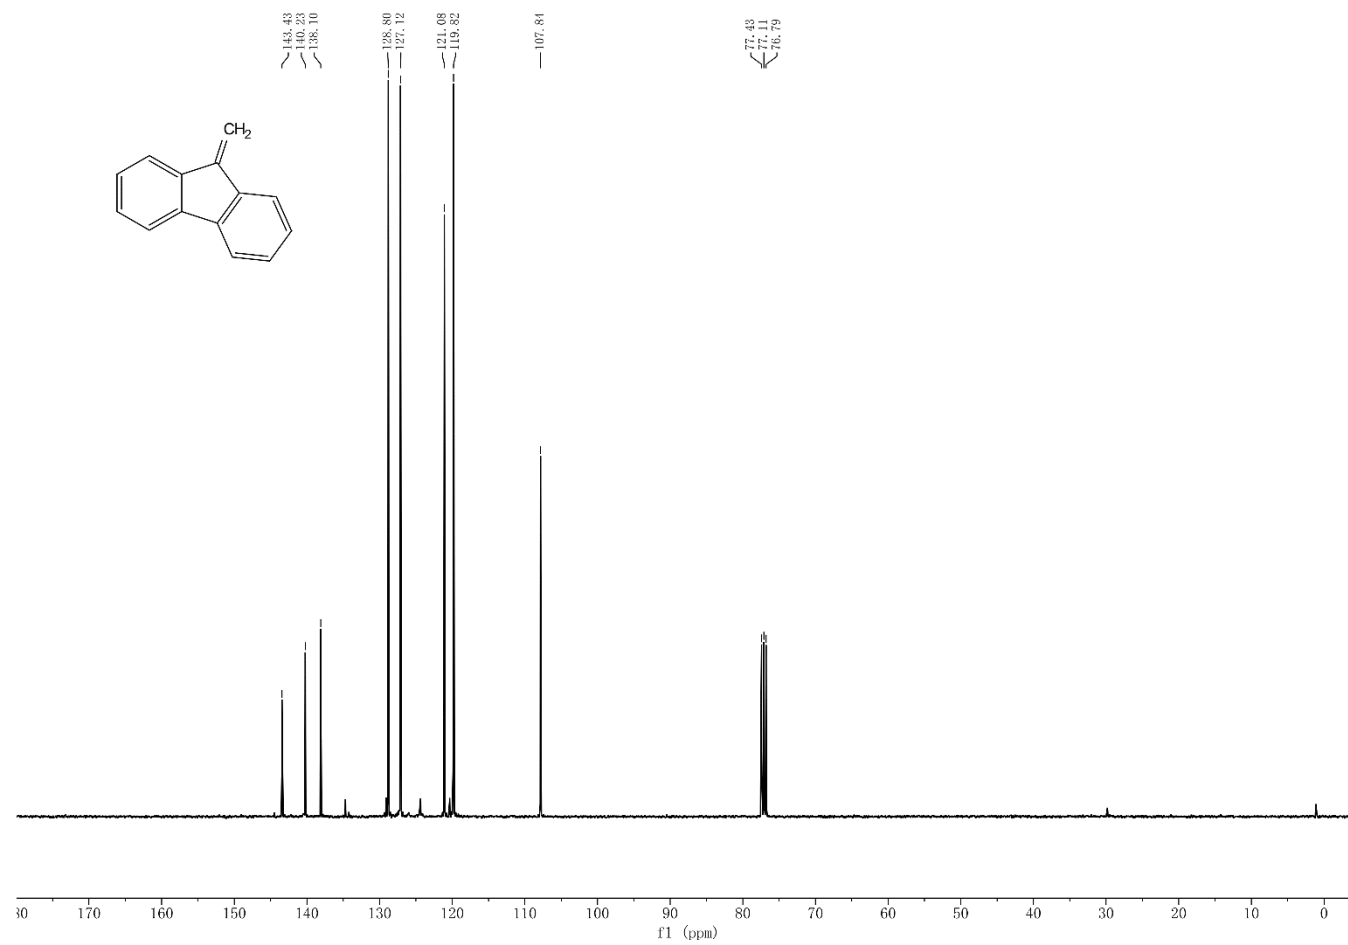

<sup>1</sup>H NMR (400 MHz, CDCl<sub>3</sub>) spectrum of 3r

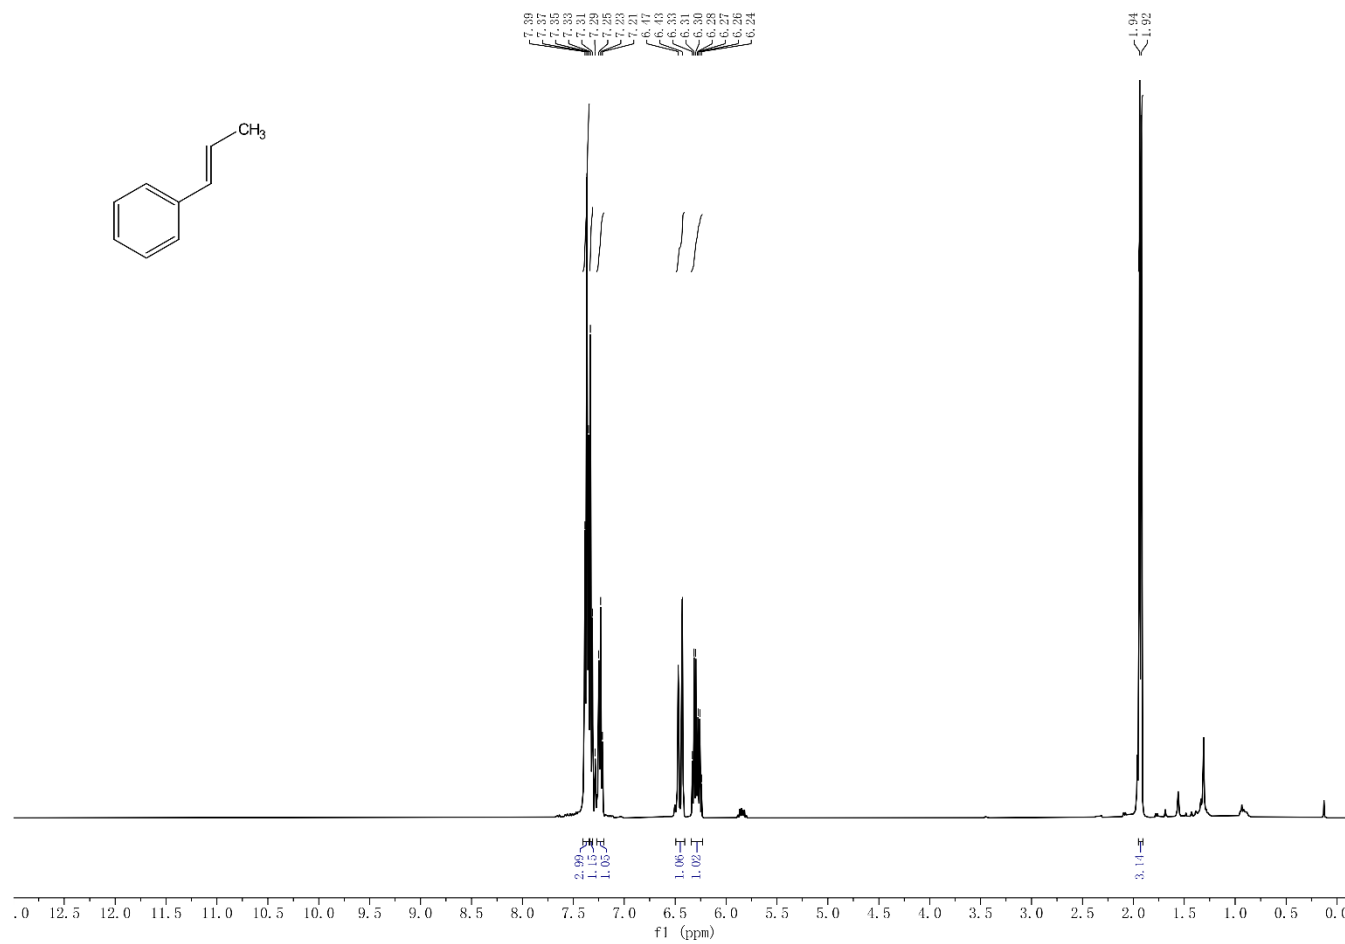

$^{13}\text{C}\{^1\text{H}\}$  NMR (101 MHz,  $\text{CDCl}_3$ ) spectrum of 3r

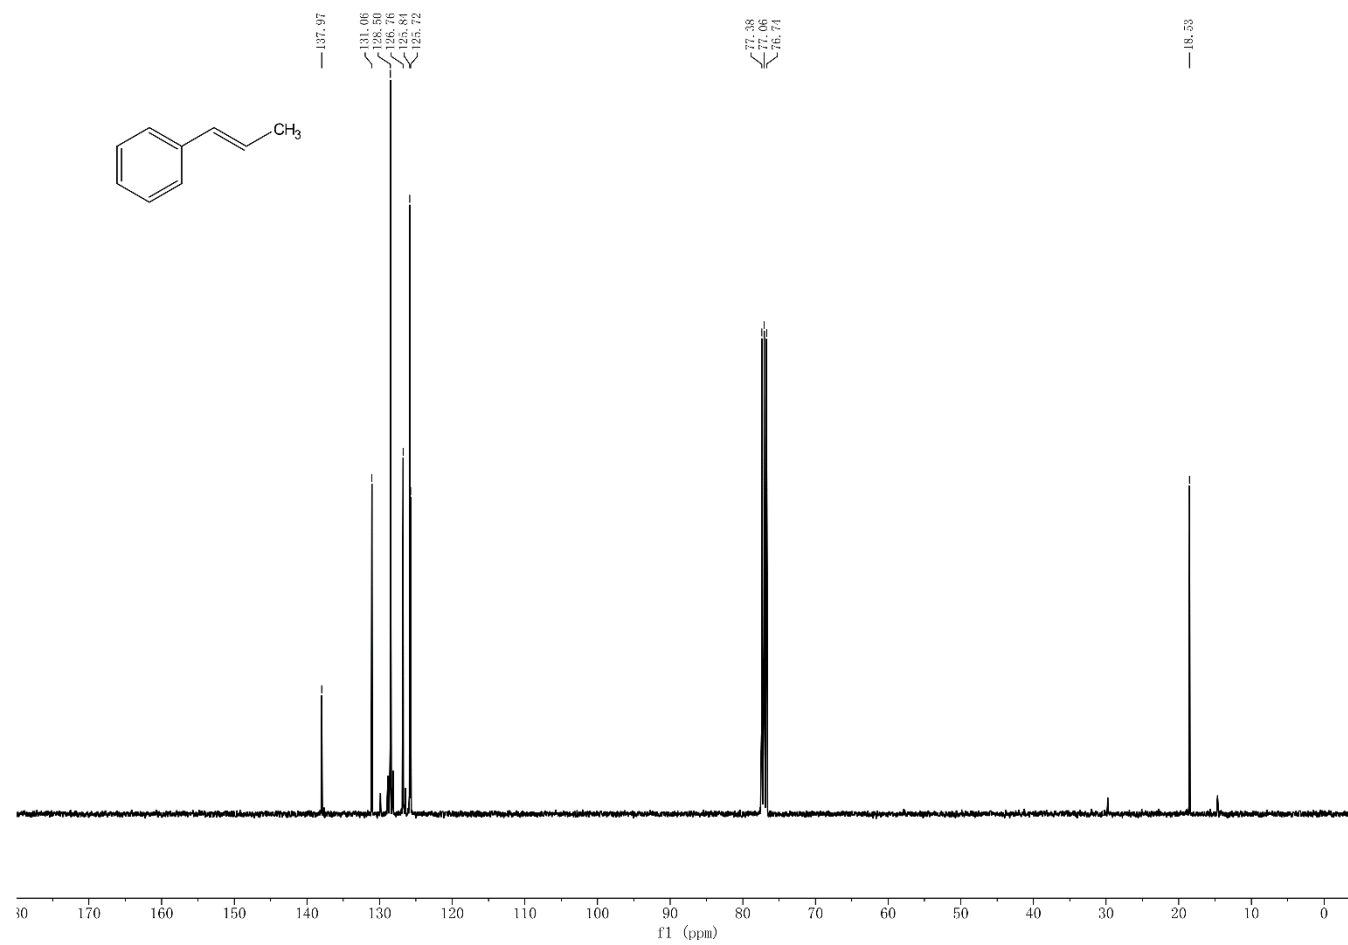

<sup>1</sup>H NMR (400 MHz, CDCl<sub>3</sub>) spectrum of 4a

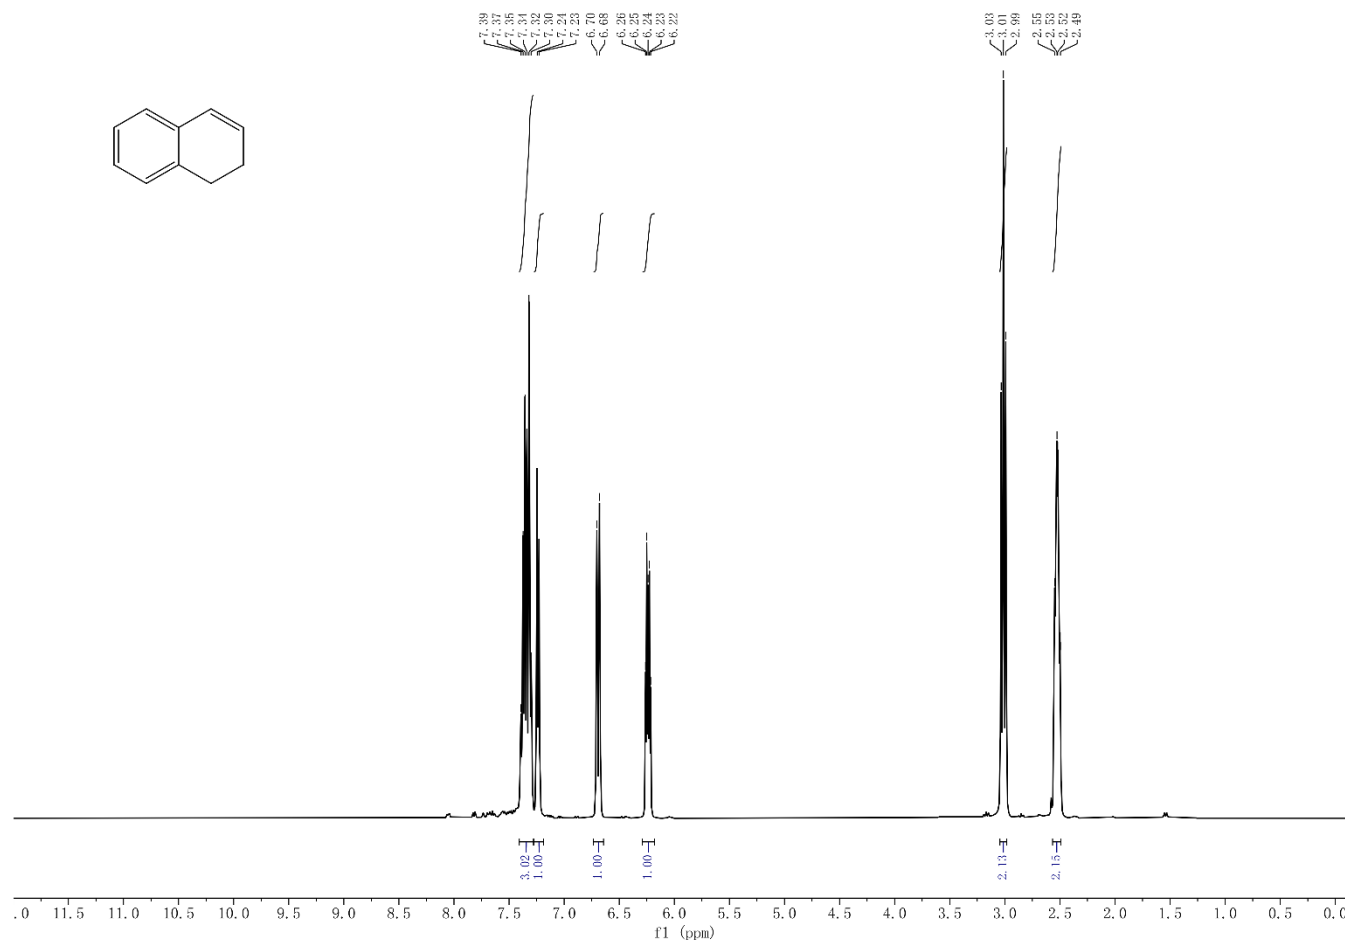

$^{13}\text{C}\{^1\text{H}\}$  NMR (101 MHz,  $\text{CDCl}_3$ ) spectrum of 4a

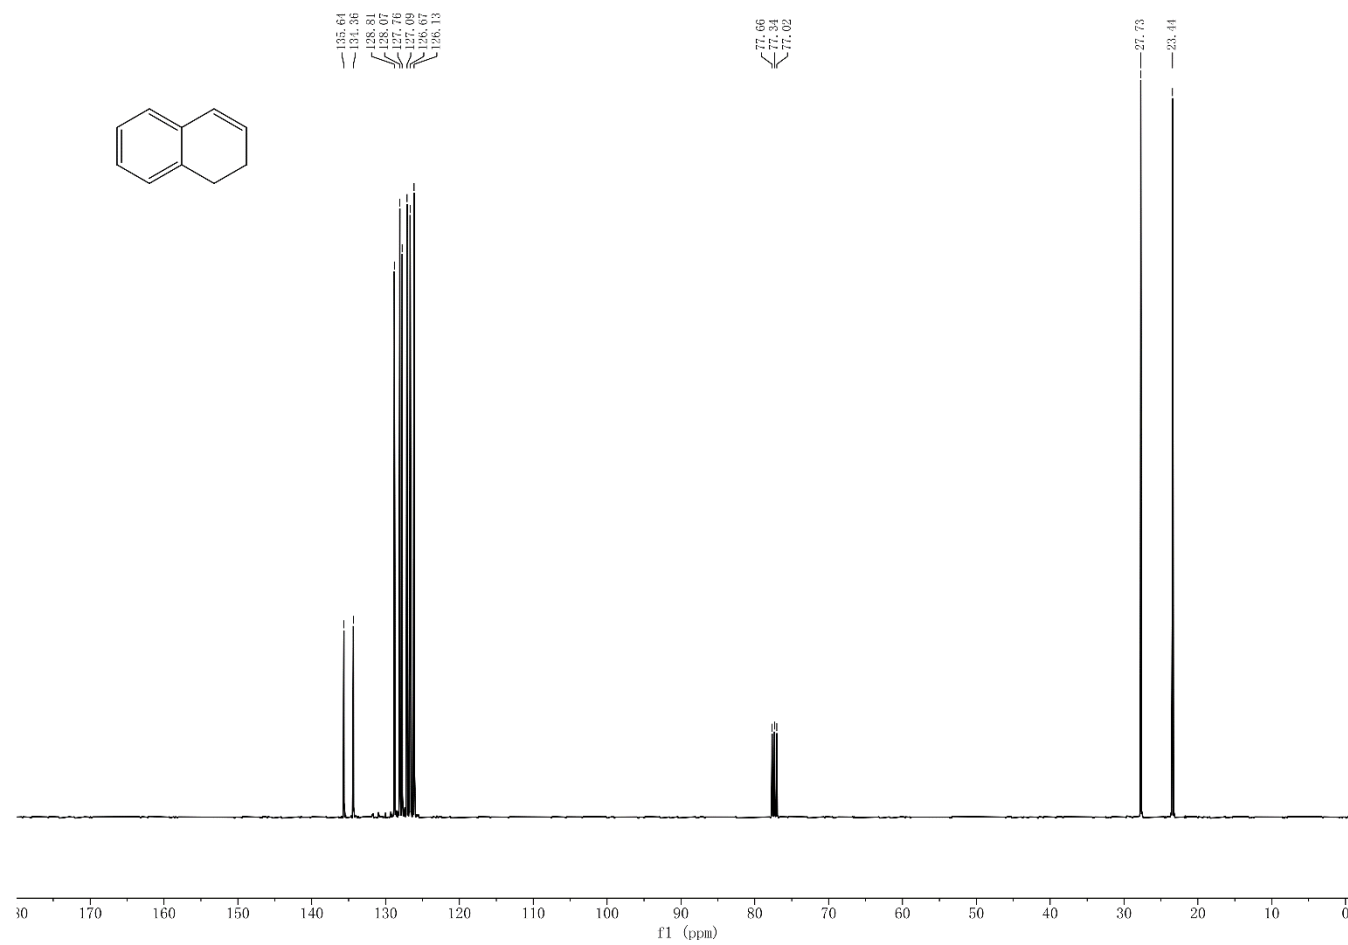

<sup>1</sup>H NMR (400 MHz, CDCl<sub>3</sub>) spectrum of 4b

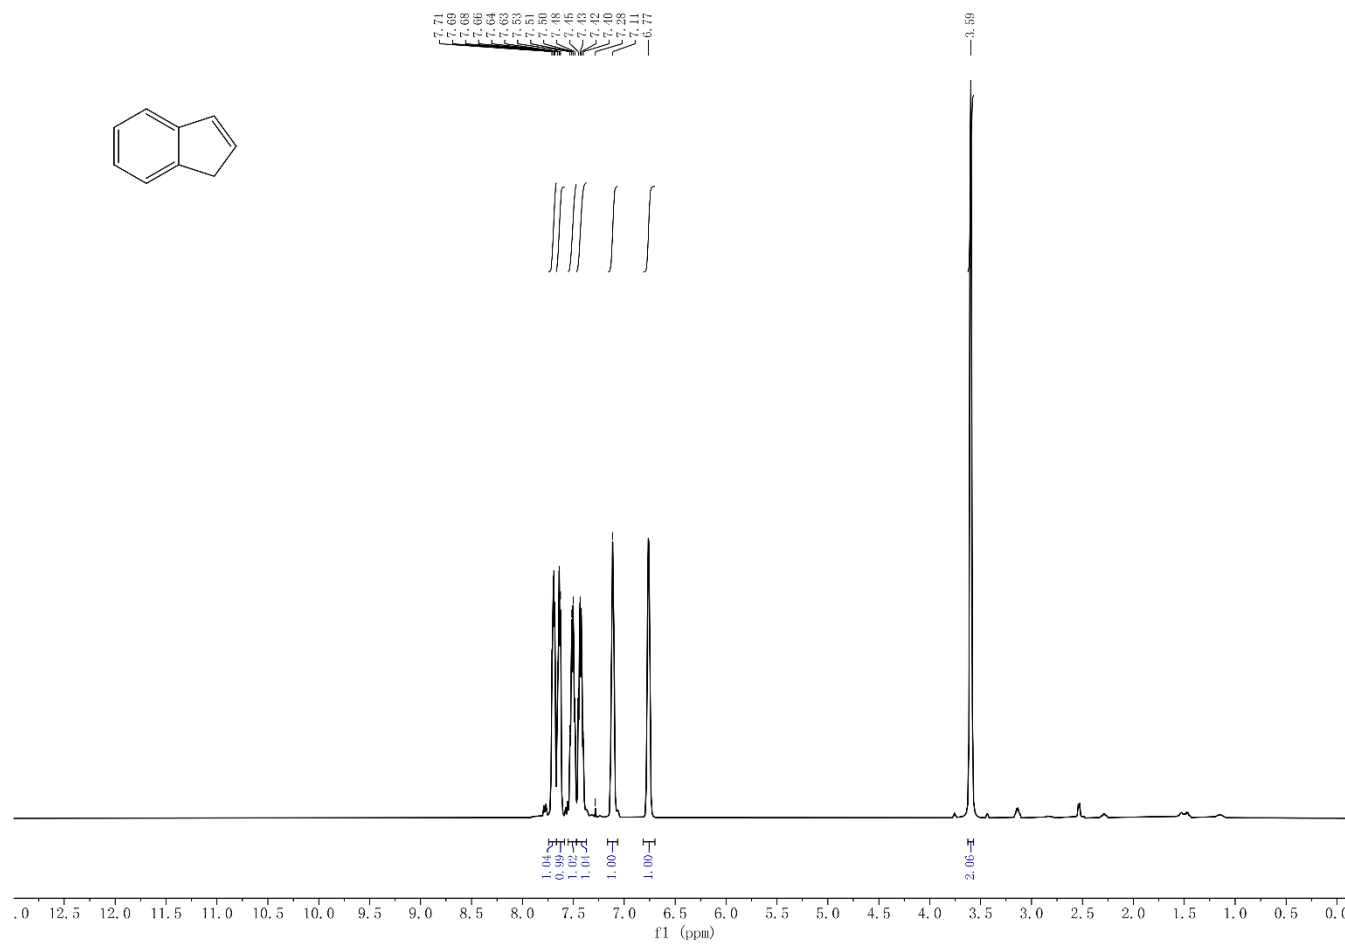

$^{13}\text{C}\{^1\text{H}\}$  NMR (101 MHz,  $\text{CDCl}_3$ ) spectrum of 4b

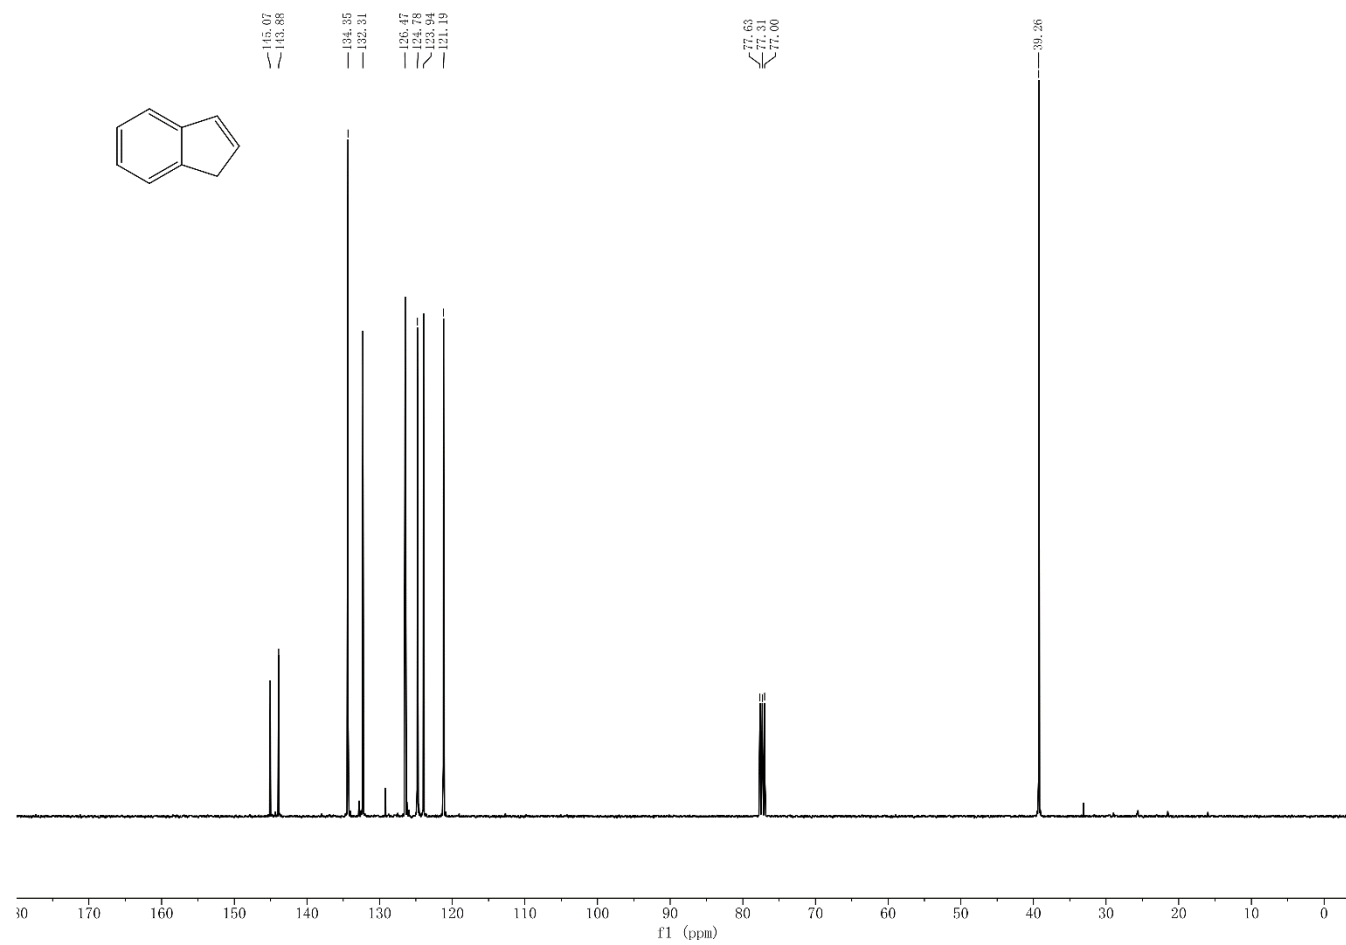



<sup>1</sup>H NMR (400 MHz, CDCl<sub>3</sub>) spectrum of 4c

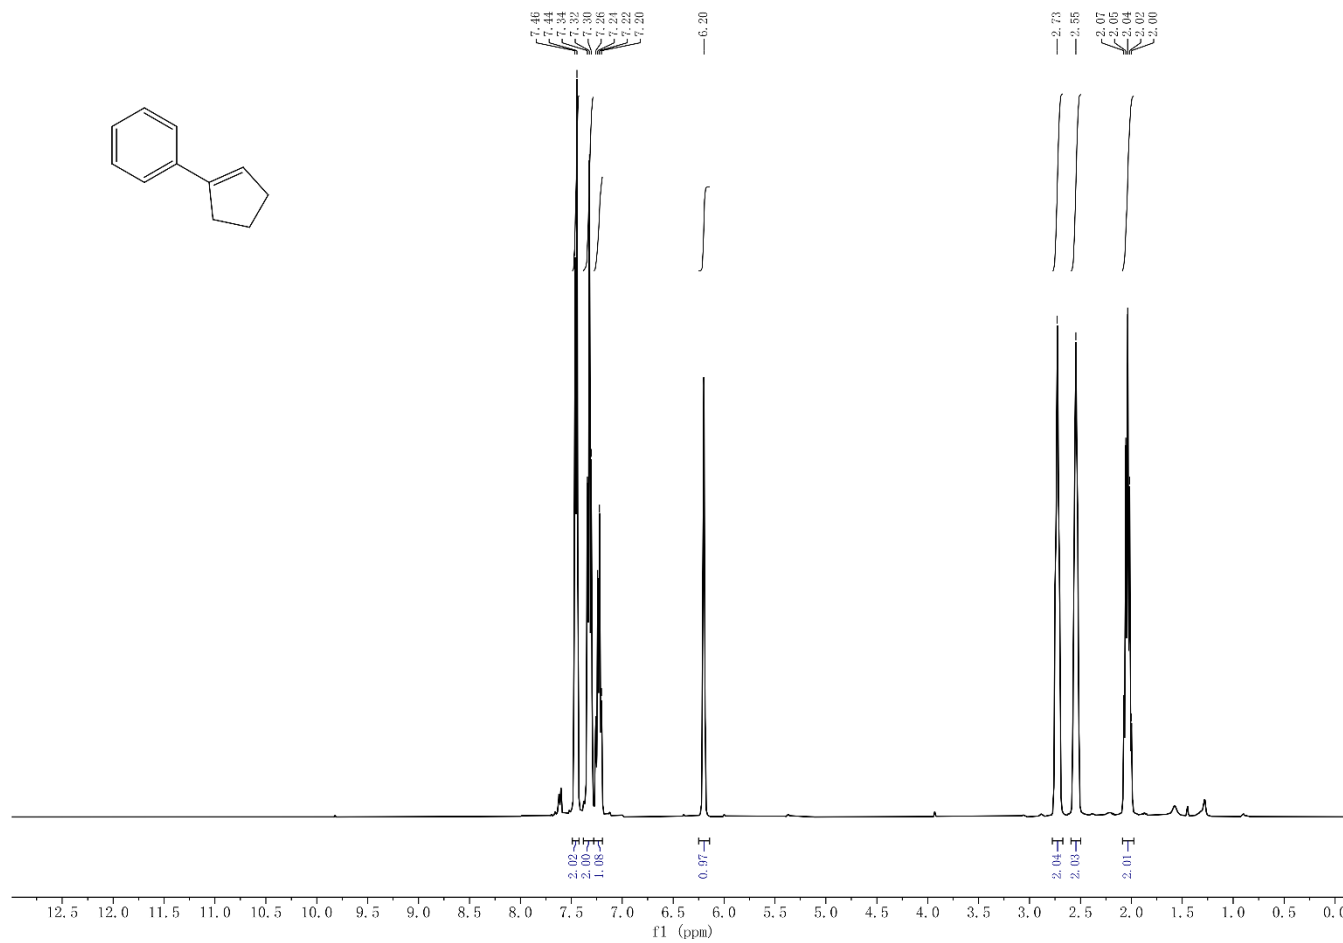

$^{13}\text{C}\{^1\text{H}\}$  NMR (101 MHz,  $\text{CDCl}_3$ ) spectrum of 4c

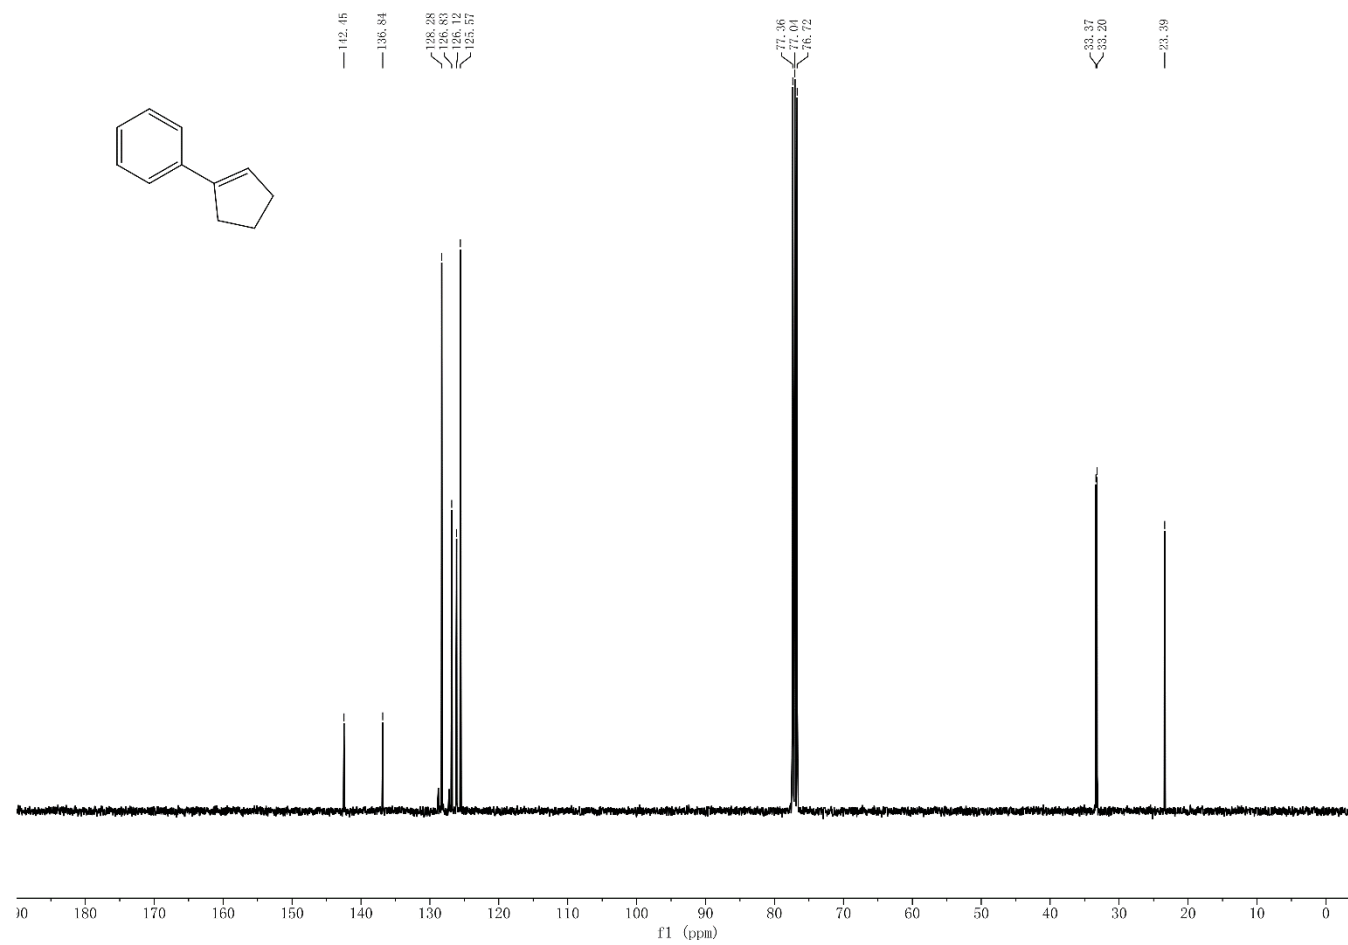

<sup>1</sup>H NMR (400 MHz, CDCl<sub>3</sub>) spectrum of 4d

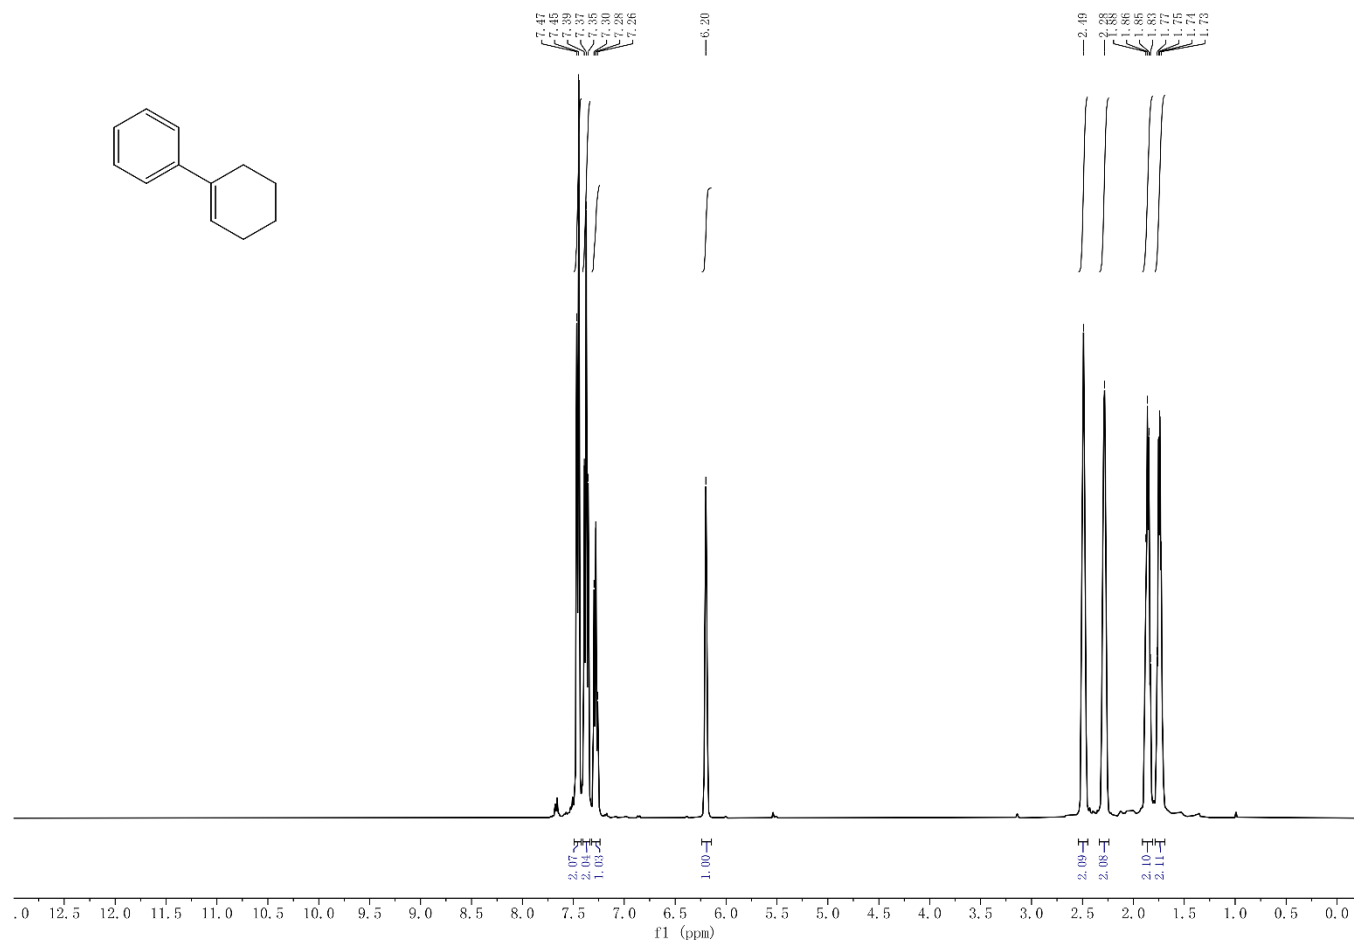

$^{13}\text{C}\{^1\text{H}\}$  NMR (101 MHz,  $\text{CDCl}_3$ ) spectrum of 4d

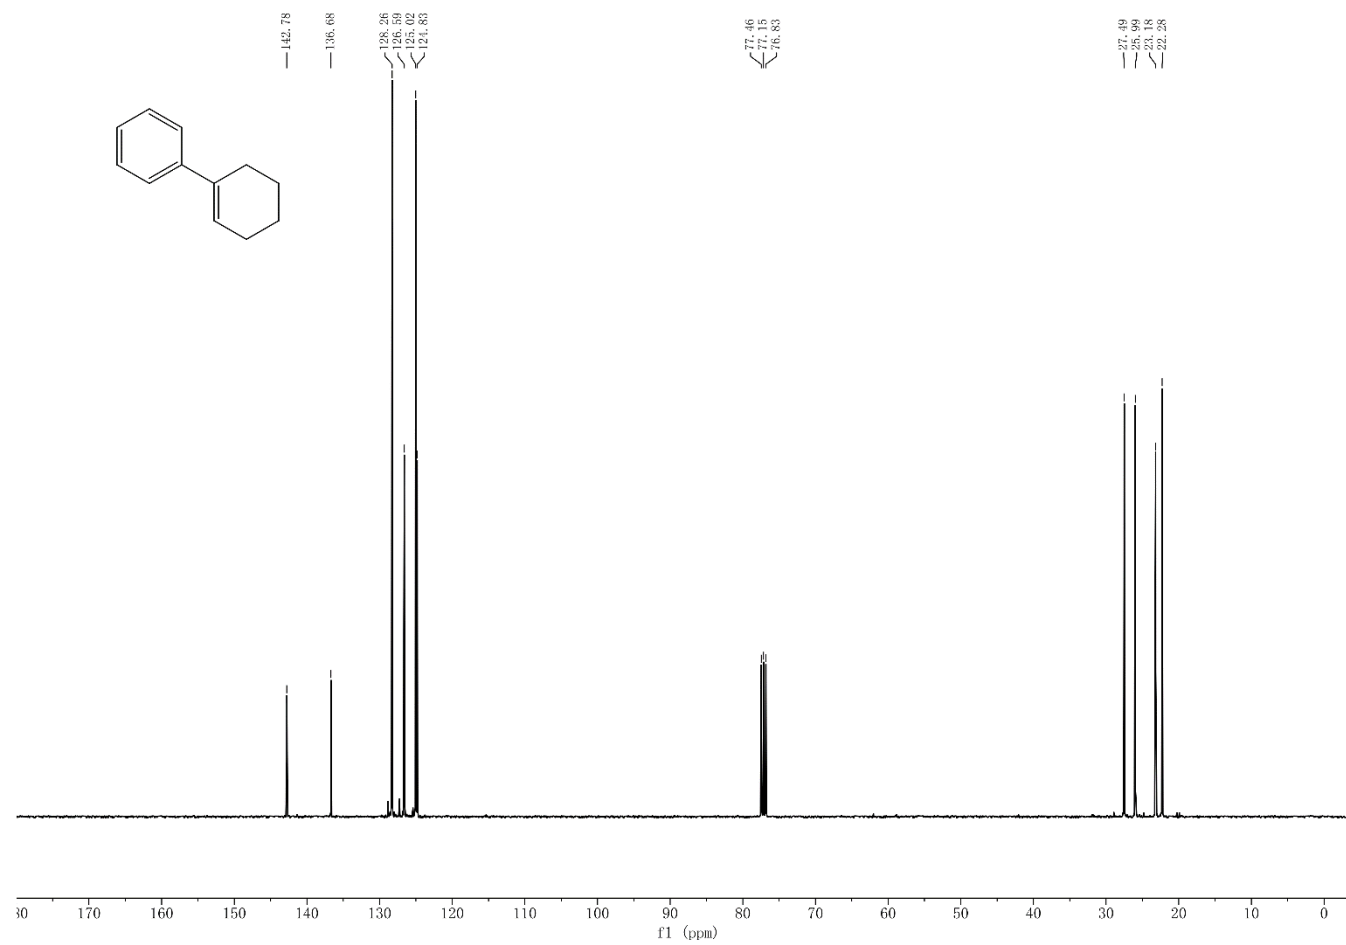

<sup>1</sup>H NMR (400 MHz, CDCl<sub>3</sub>) spectrum of 5a

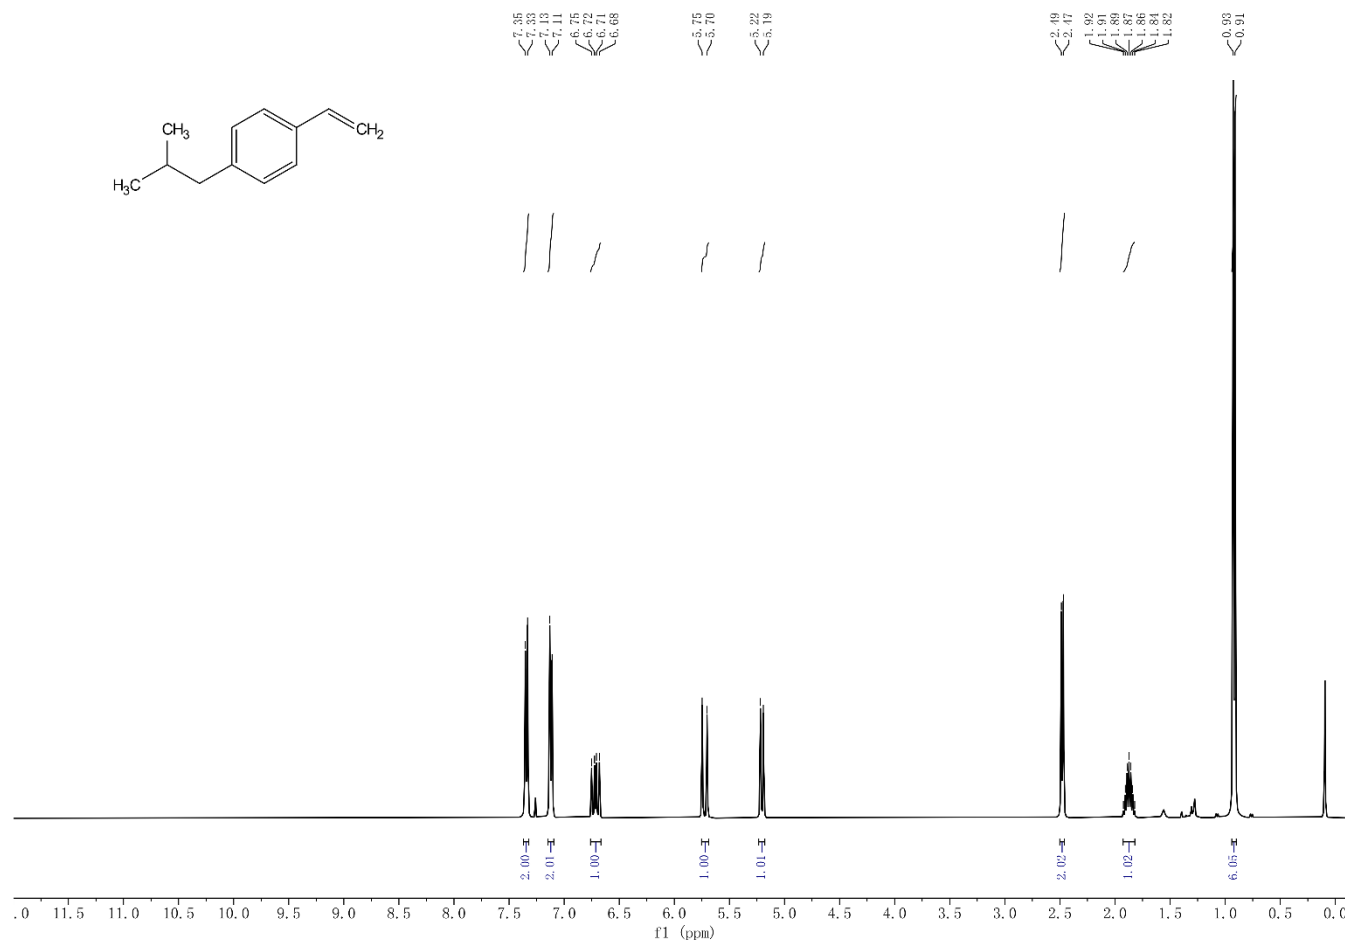

$^{13}\text{C}\{^1\text{H}\}$  NMR (101 MHz,  $\text{CDCl}_3$ ) spectrum of 5a

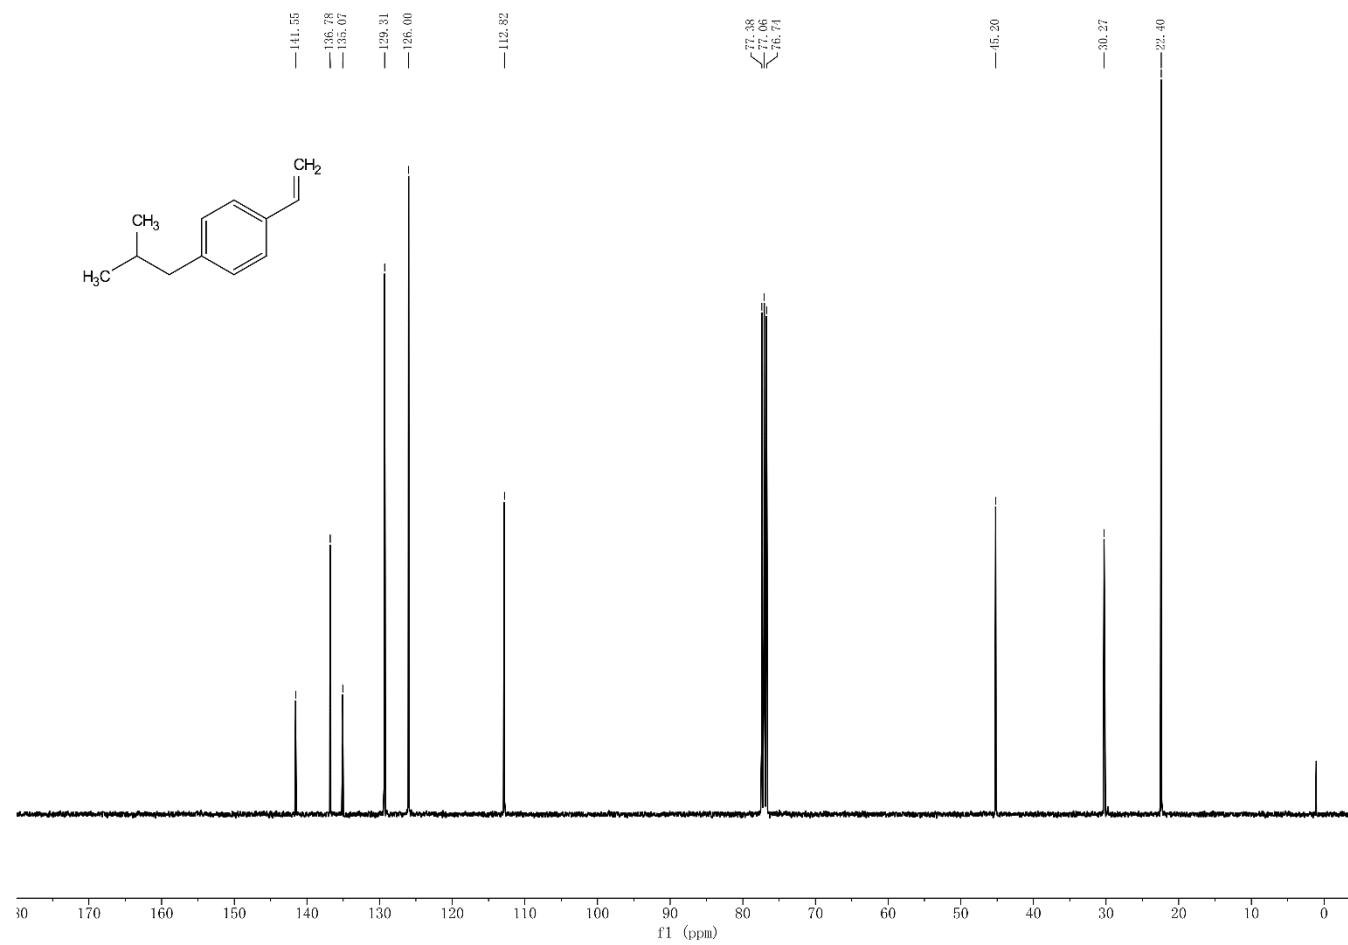

<sup>1</sup>H NMR (400 MHz, CDCl<sub>3</sub>) spectrum of 5b

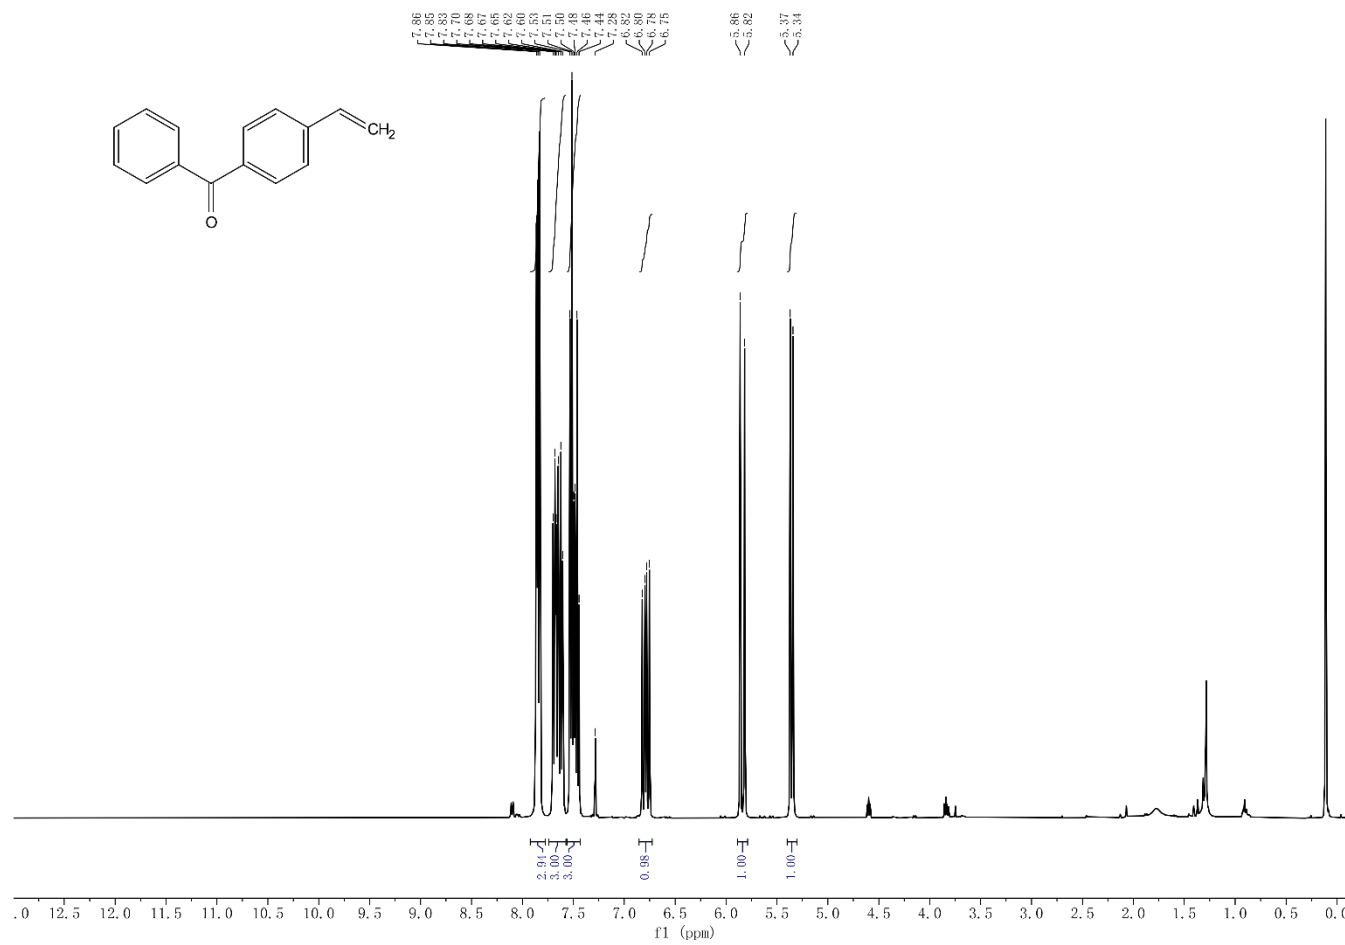

$^{13}\text{C}\{^1\text{H}\}$  NMR (101 MHz,  $\text{CDCl}_3$ ) spectrum of 5b

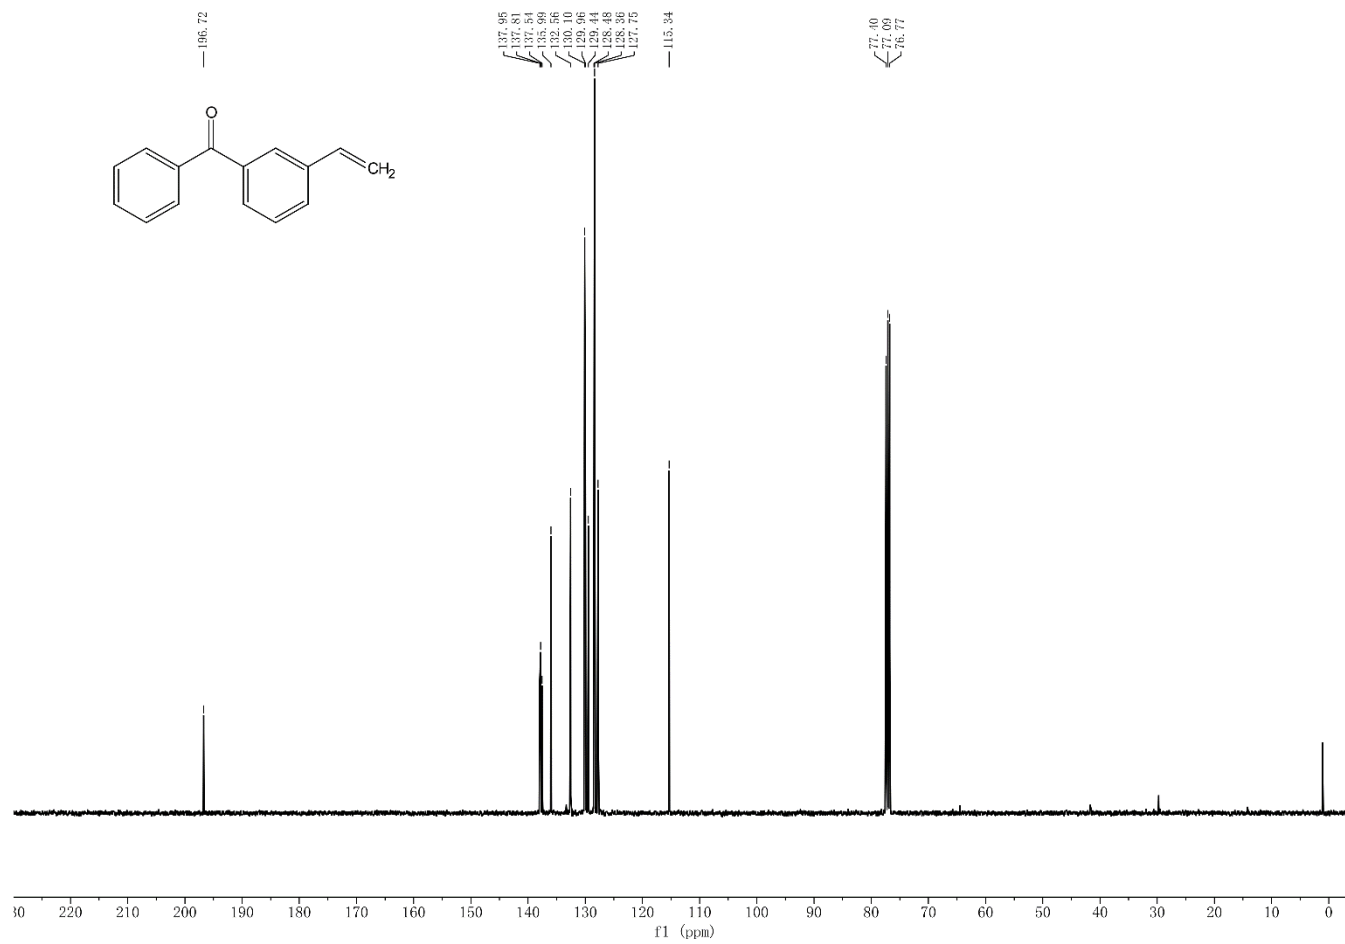



<sup>1</sup>H NMR (400 MHz, CDCl<sub>3</sub>) spectrum of 5c

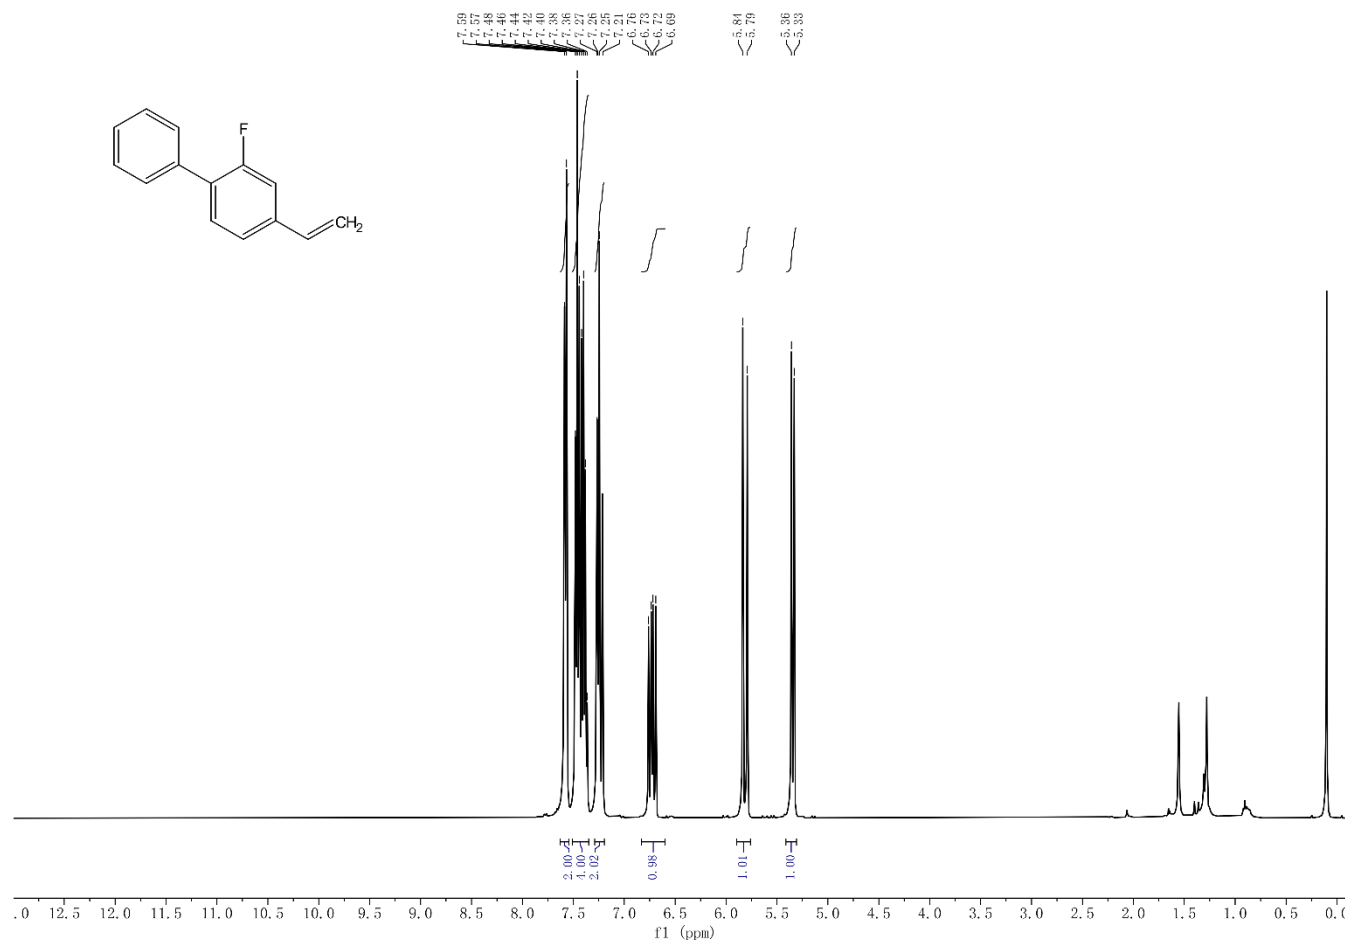

$^{13}\text{C}\{^1\text{H}\}$  NMR (101 MHz,  $\text{CDCl}_3$ ) spectrum of 5c

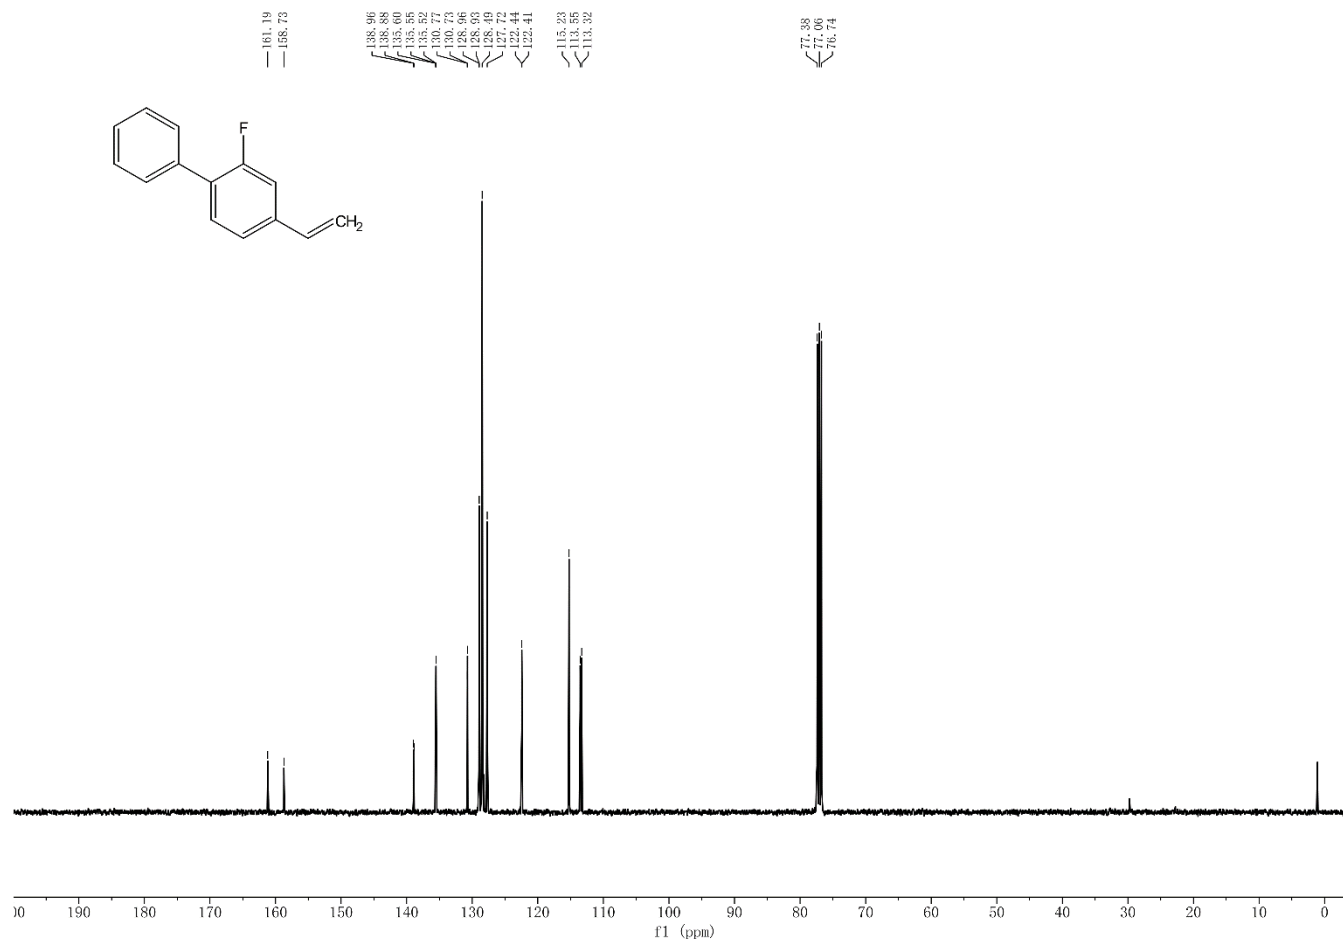

<sup>19</sup>F NMR (377 MHz, CDCl<sub>3</sub>) spectrum of 5c

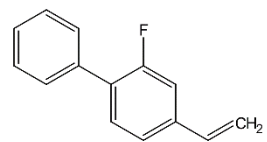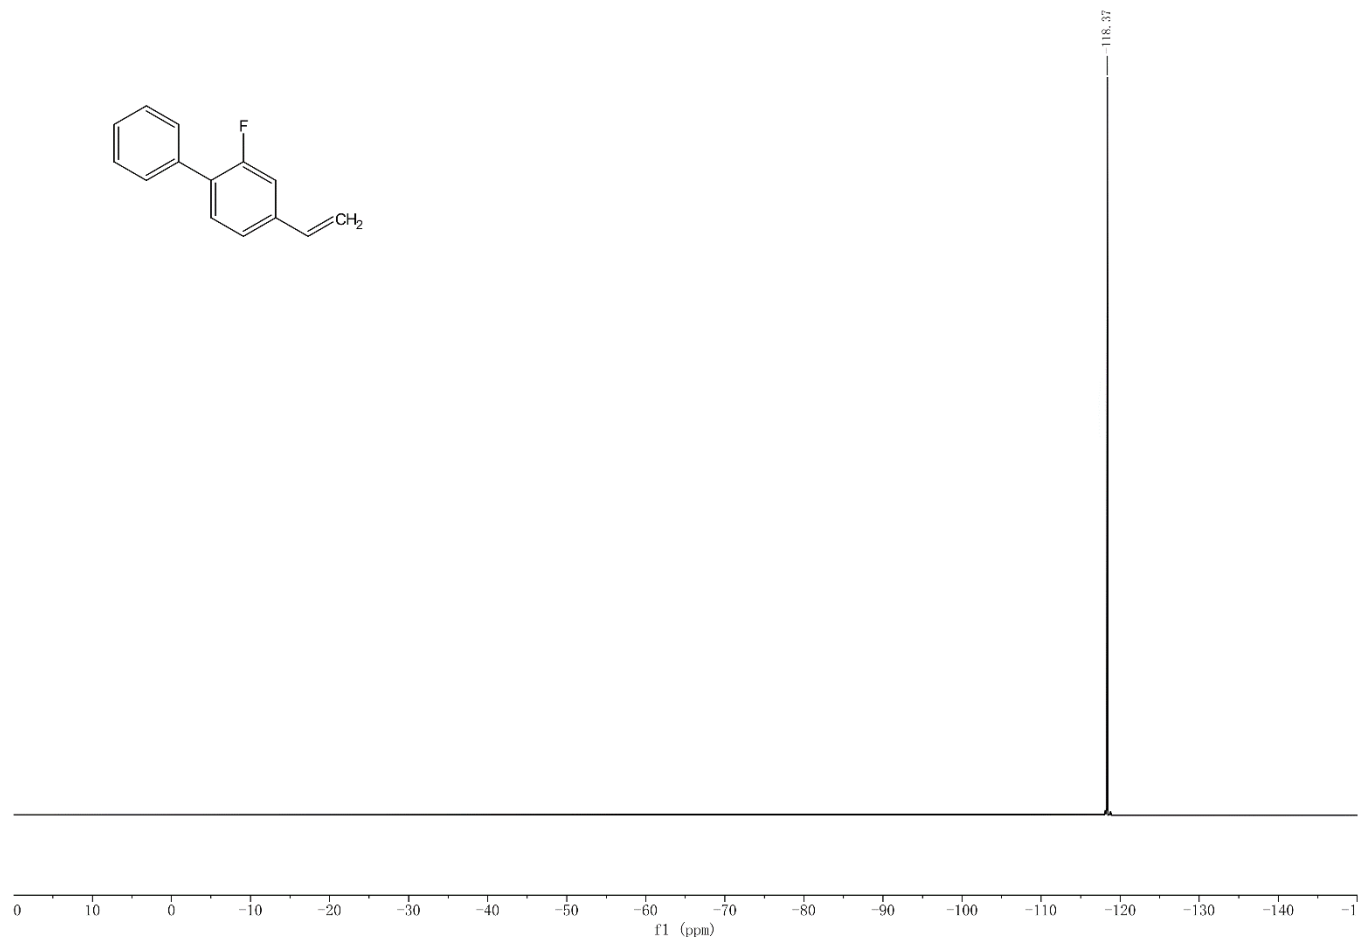

<sup>1</sup>H NMR (400 MHz, CDCl<sub>3</sub>) spectrum of 5d

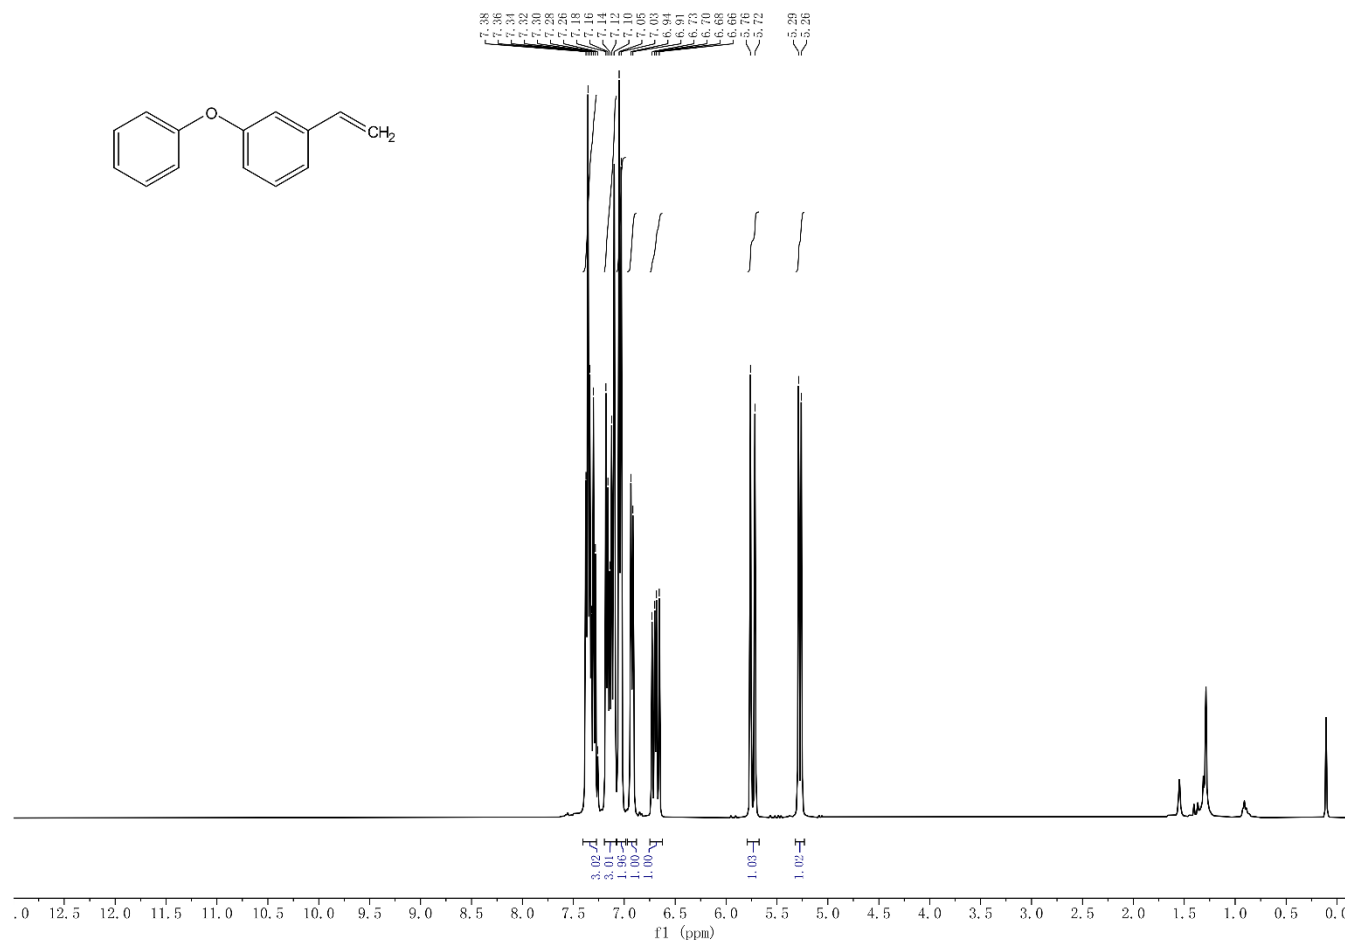

$^{13}\text{C}\{^1\text{H}\}$  NMR (101 MHz,  $\text{CDCl}_3$ ) spectrum of 5d

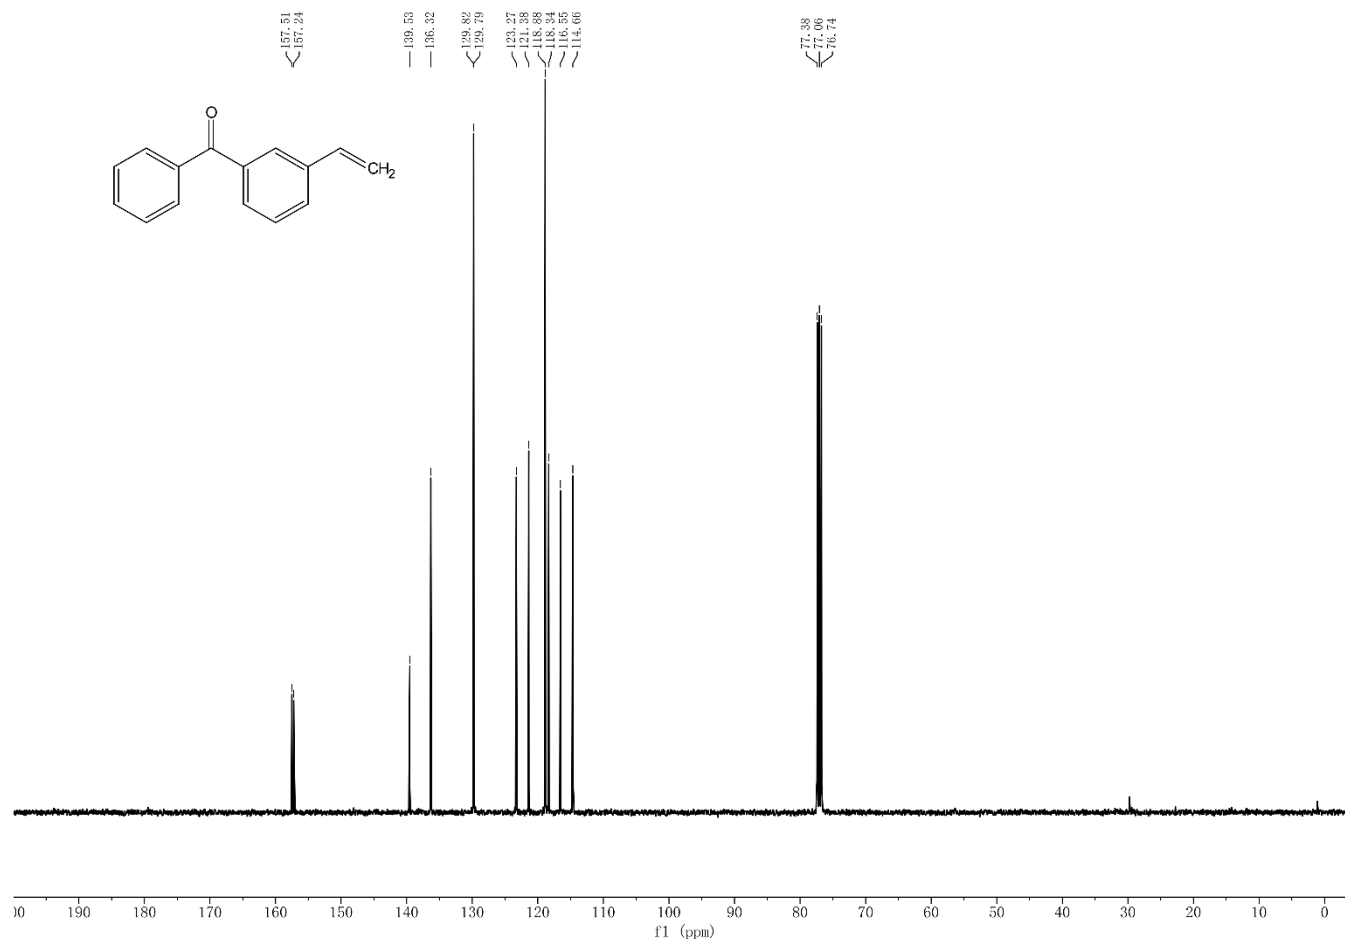

<sup>1</sup>H NMR (400 MHz, CDCl<sub>3</sub>) spectrum of 5e

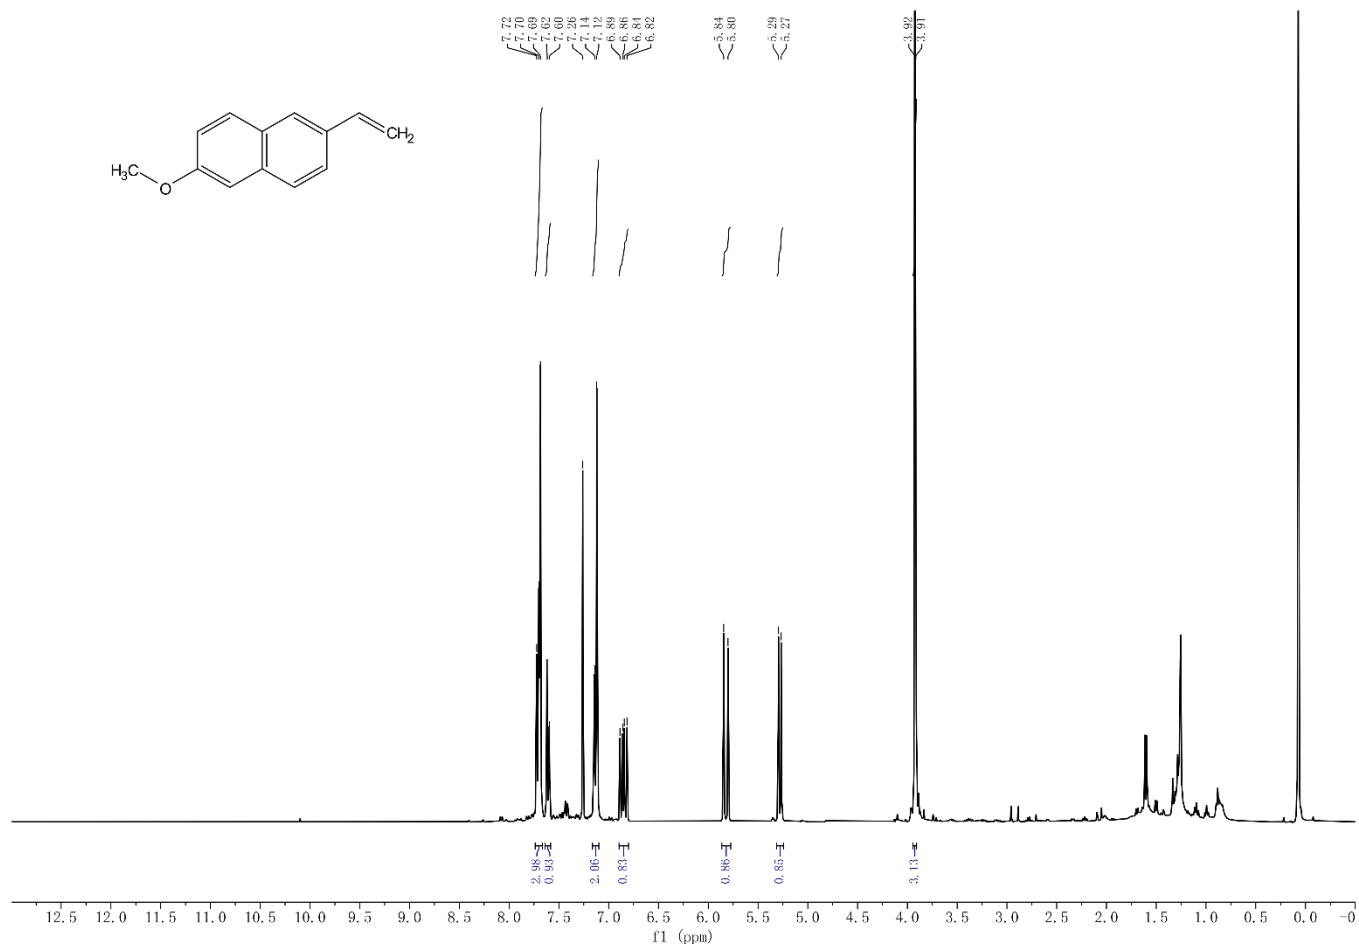

$^{13}\text{C}\{^1\text{H}\}$  NMR (101 MHz,  $\text{CDCl}_3$ ) spectrum of 5e

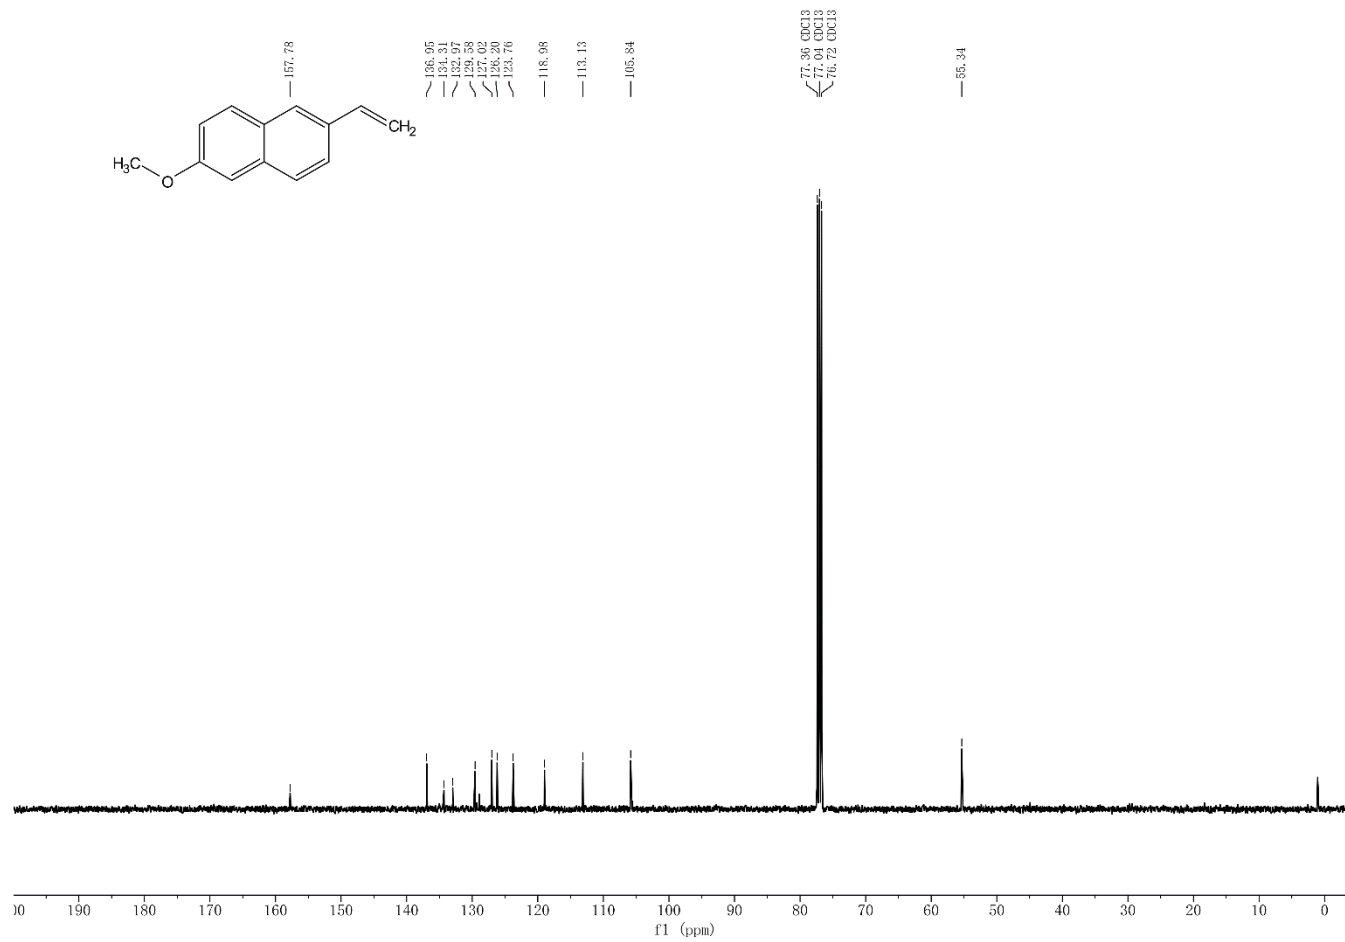

<sup>1</sup>H NMR (400 MHz, CDCl<sub>3</sub>) spectrum of 5f

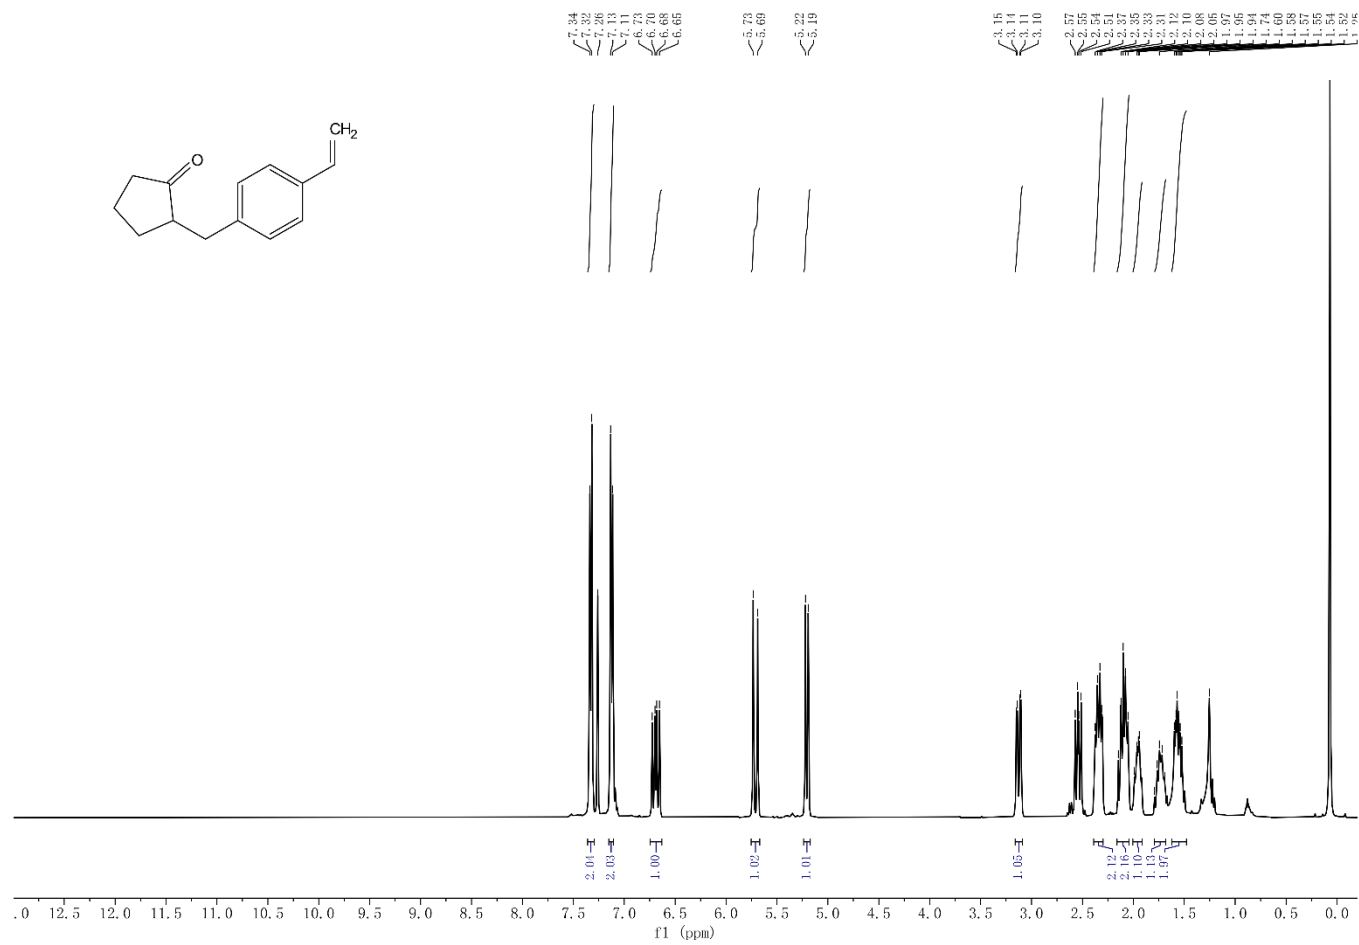



$^{13}\text{C}\{^1\text{H}\}$  NMR (101 MHz,  $\text{CDCl}_3$ ) spectrum of 5f

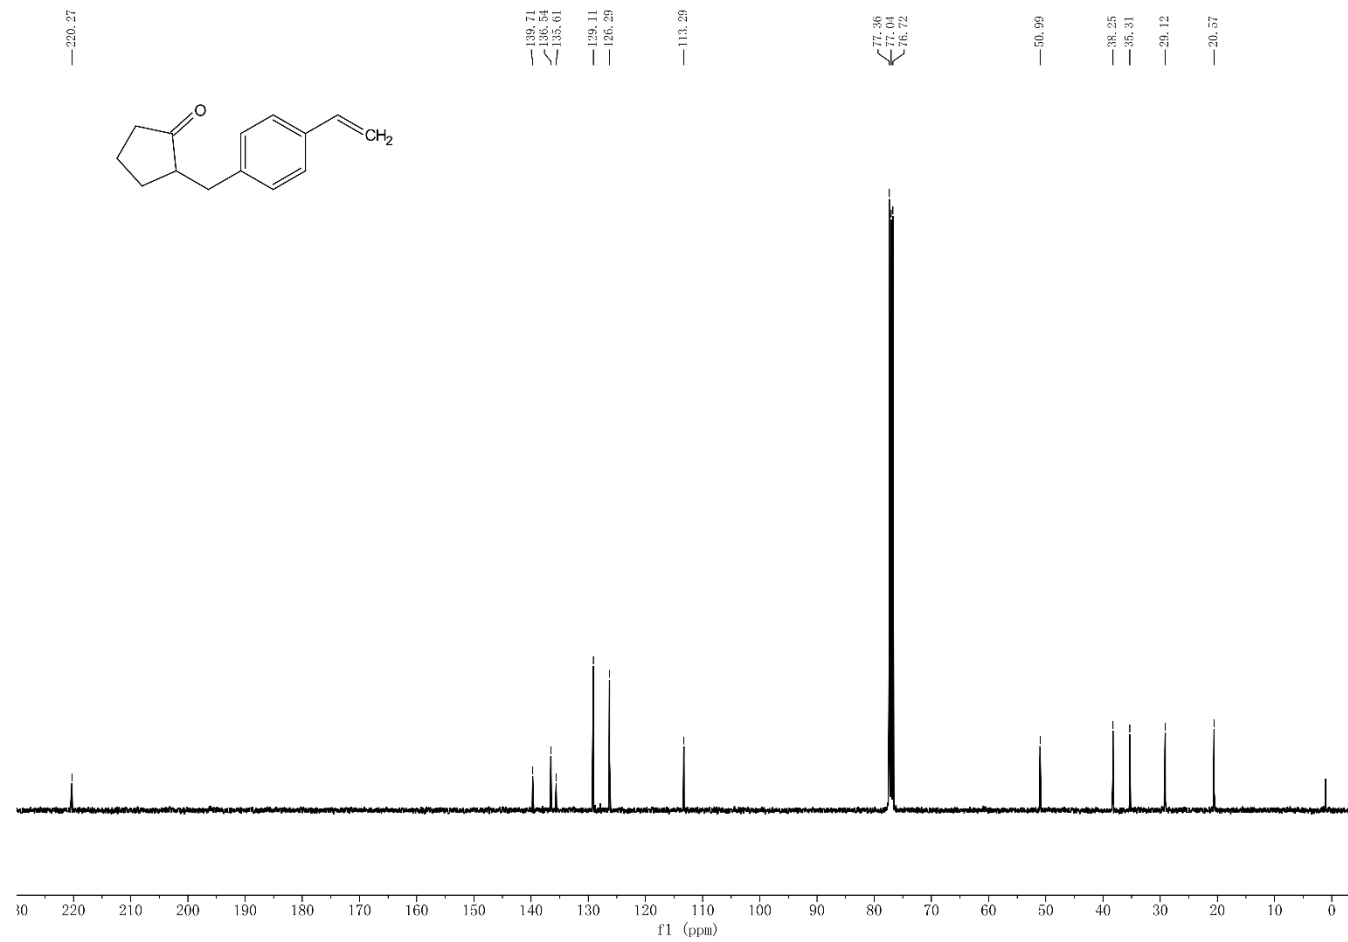

<sup>1</sup>H NMR (400 MHz, CDCl<sub>3</sub>) spectrum of 5g

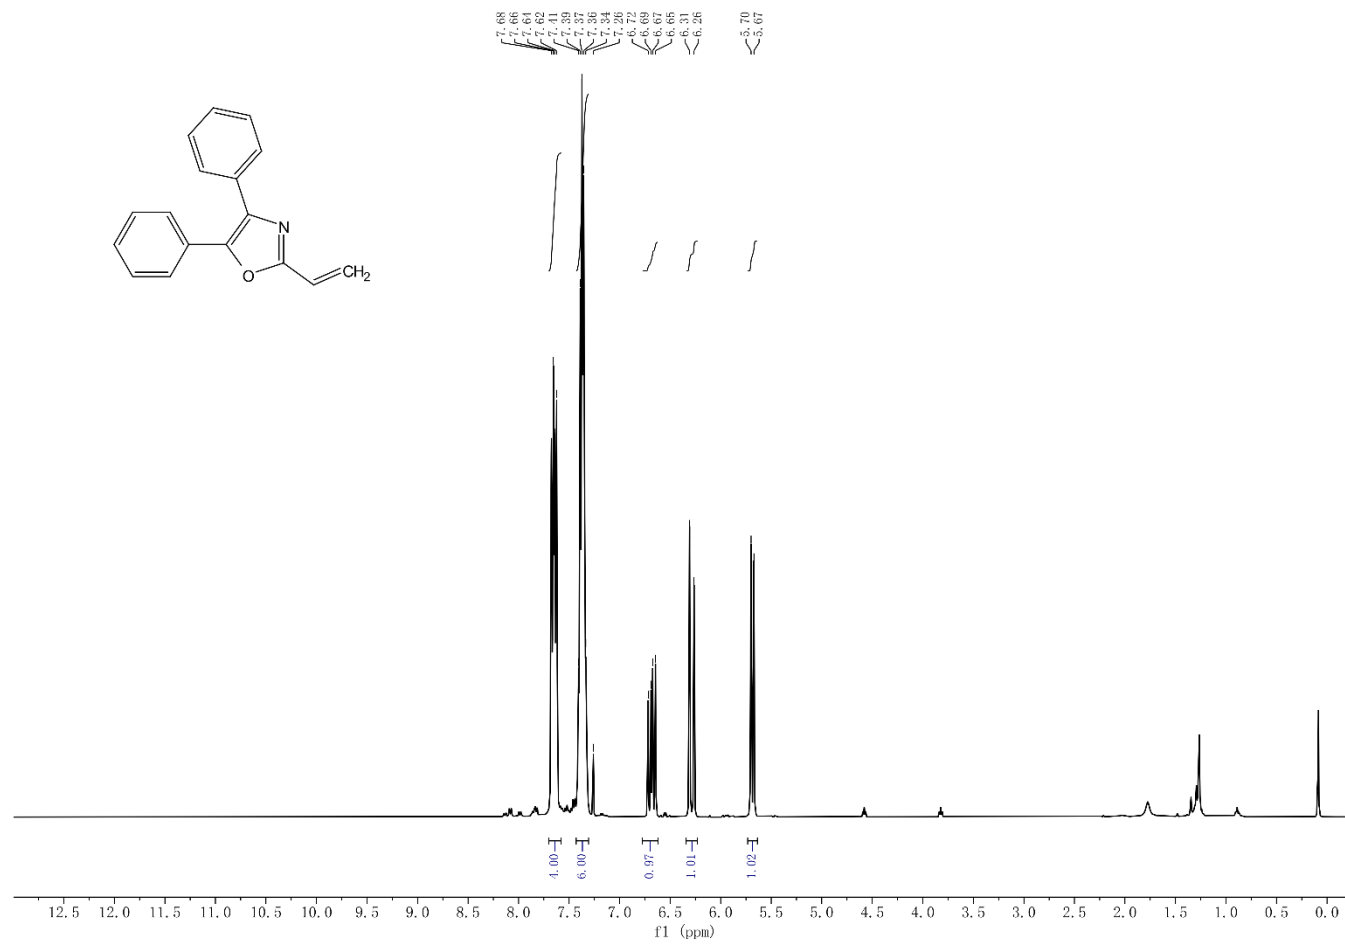

$^{13}\text{C}\{^1\text{H}\}$  NMR (101 MHz,  $\text{CDCl}_3$ ) spectrum of 5g

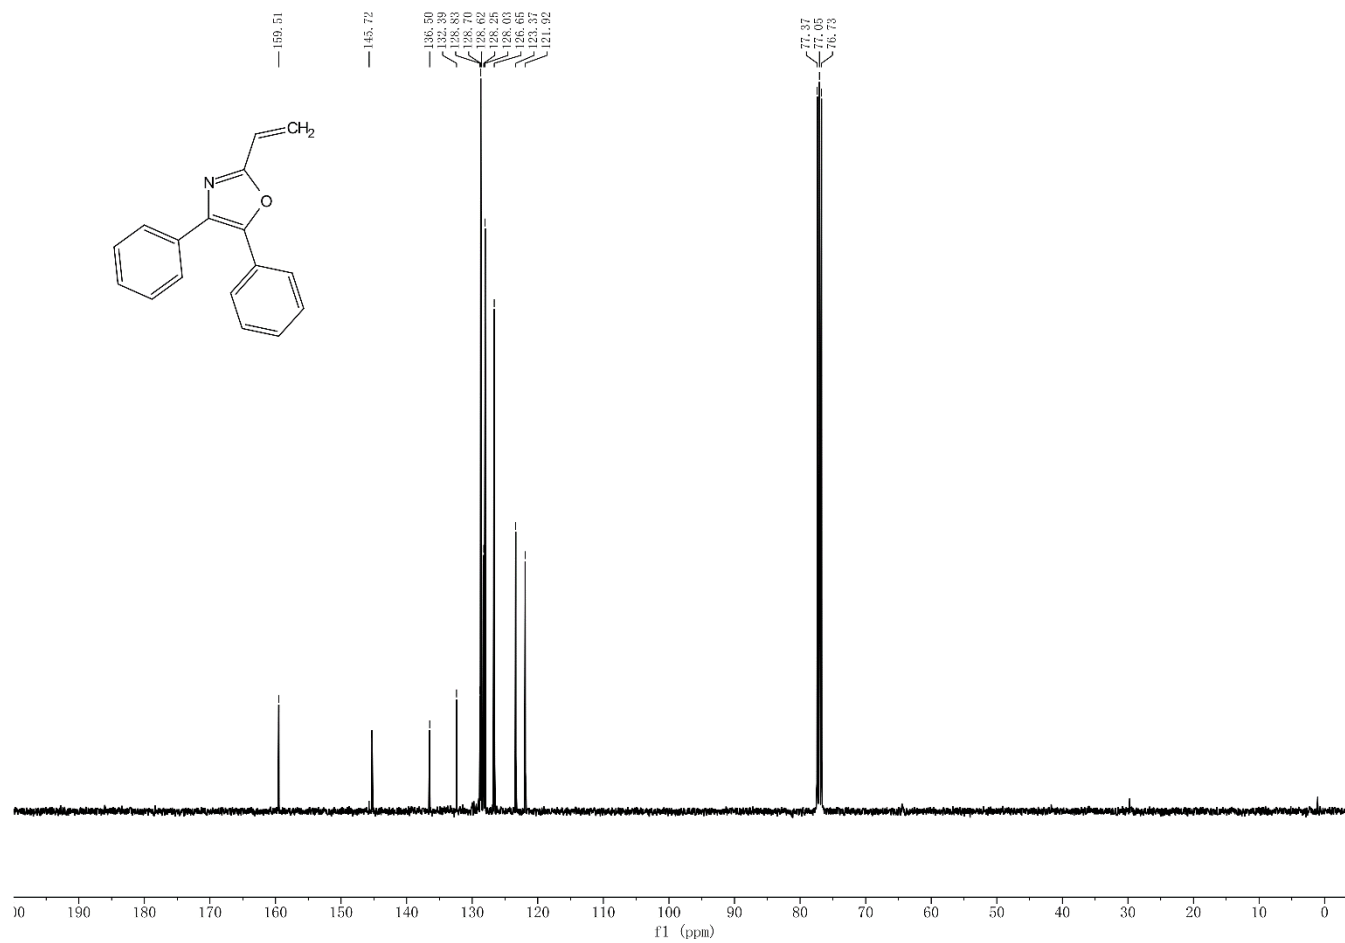

<sup>1</sup>H NMR (400 MHz, CDCl<sub>3</sub>) spectrum of 5h

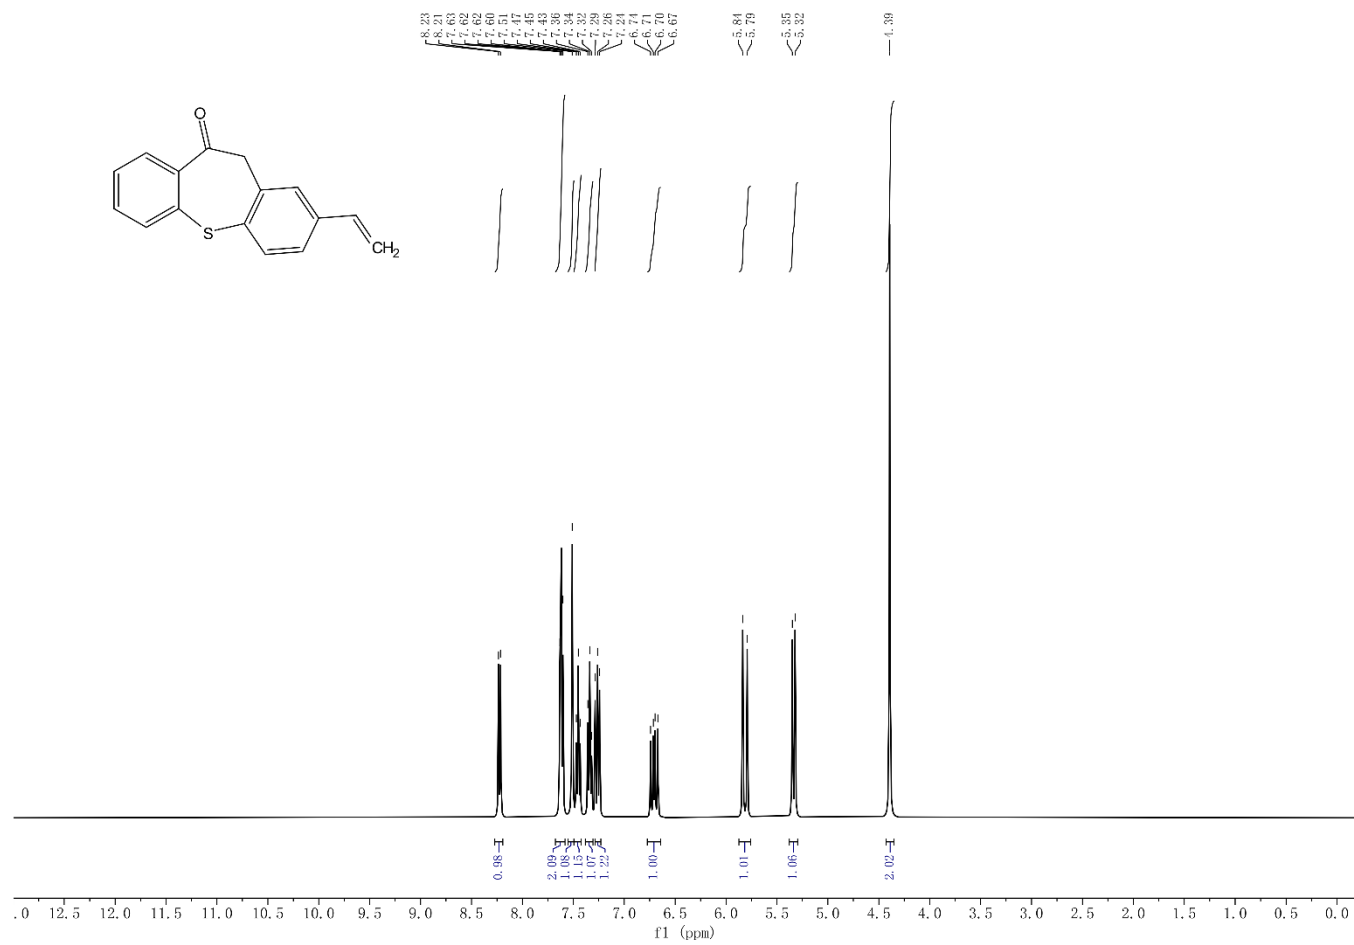

$^{13}\text{C}\{^1\text{H}\}$  NMR (101 MHz,  $\text{CDCl}_3$ ) spectrum of 5h

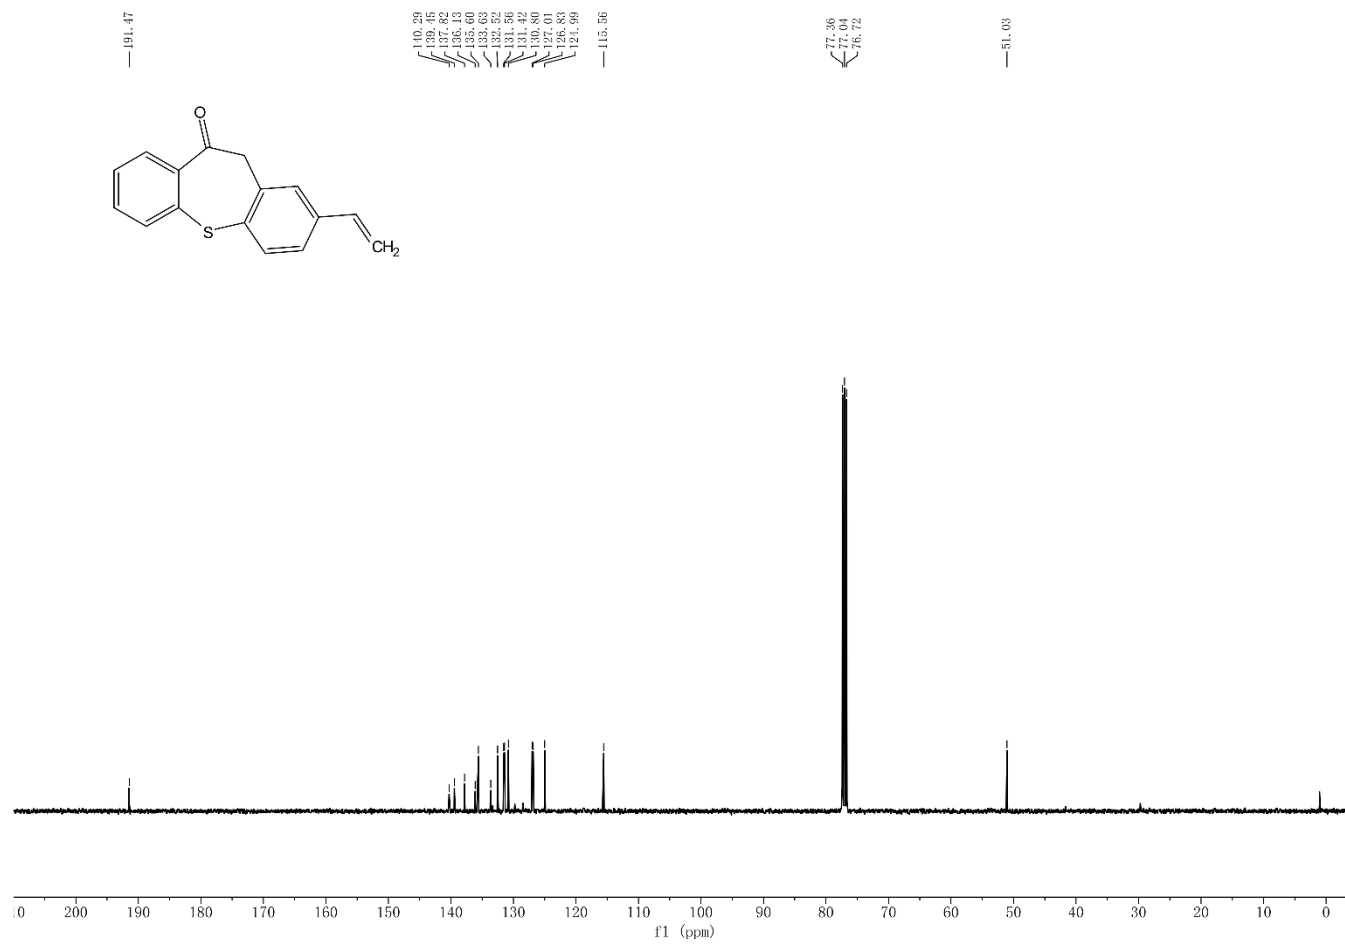

<sup>1</sup>H NMR (400 MHz, CDCl<sub>3</sub>) spectrum of 5i

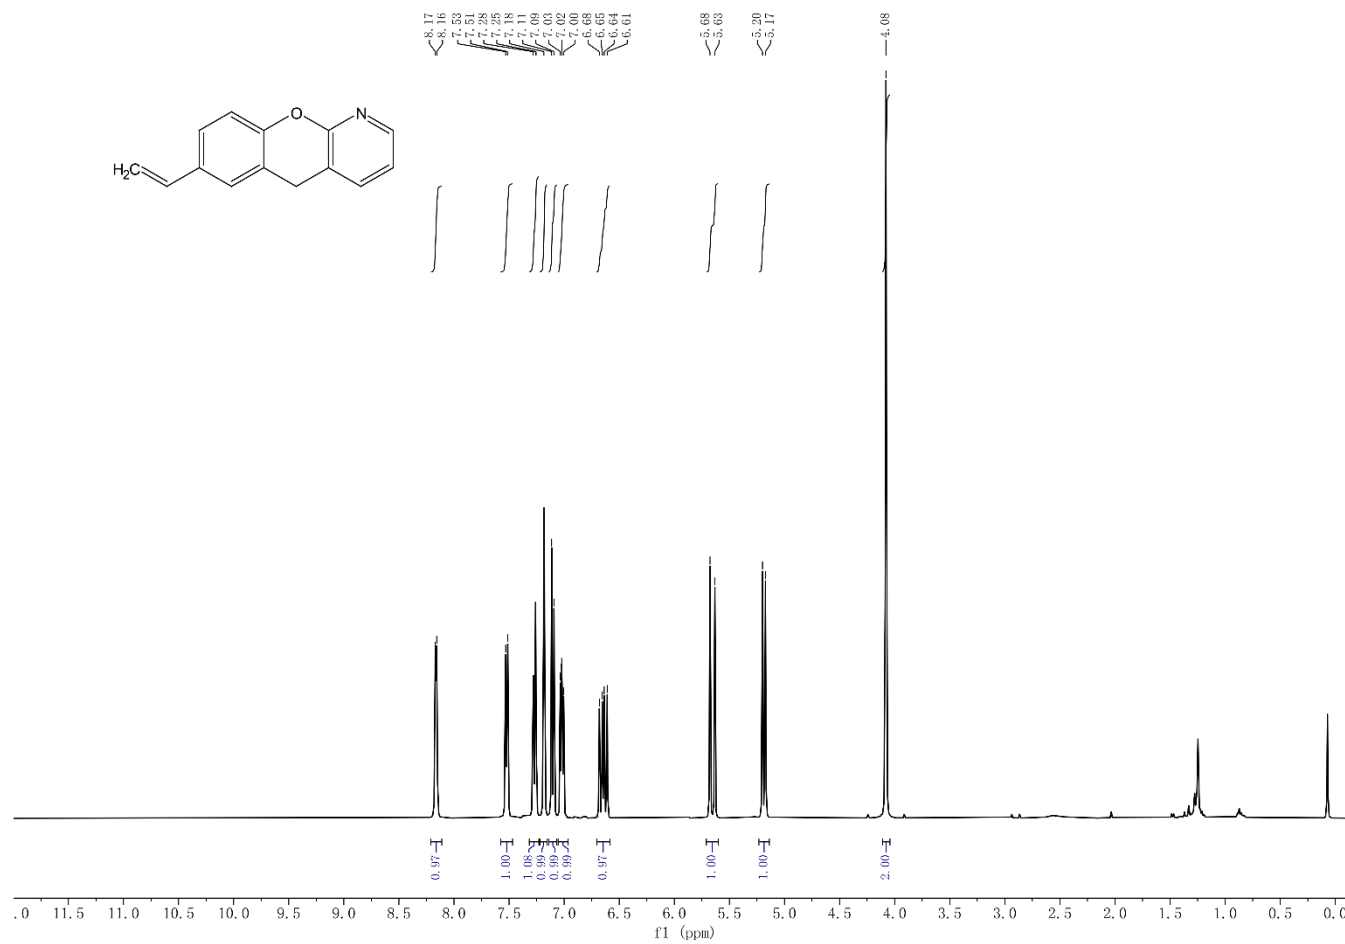

$^{13}\text{C}\{^1\text{H}\}$  NMR (101 MHz,  $\text{CDCl}_3$ ) spectrum of 5i

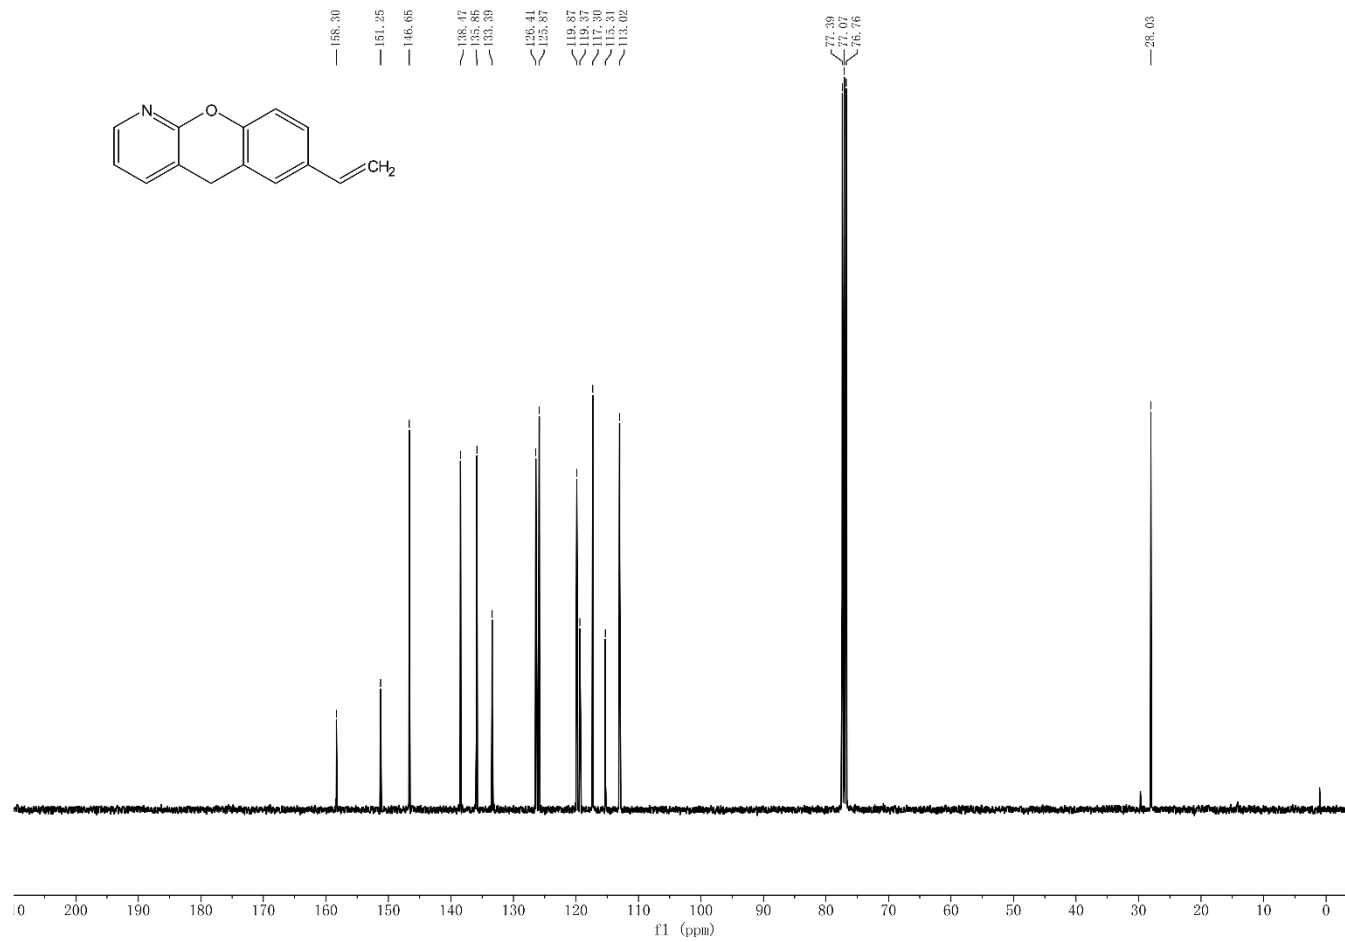

<sup>1</sup>H NMR (400 MHz, CDCl<sub>3</sub>) spectrum of 8a

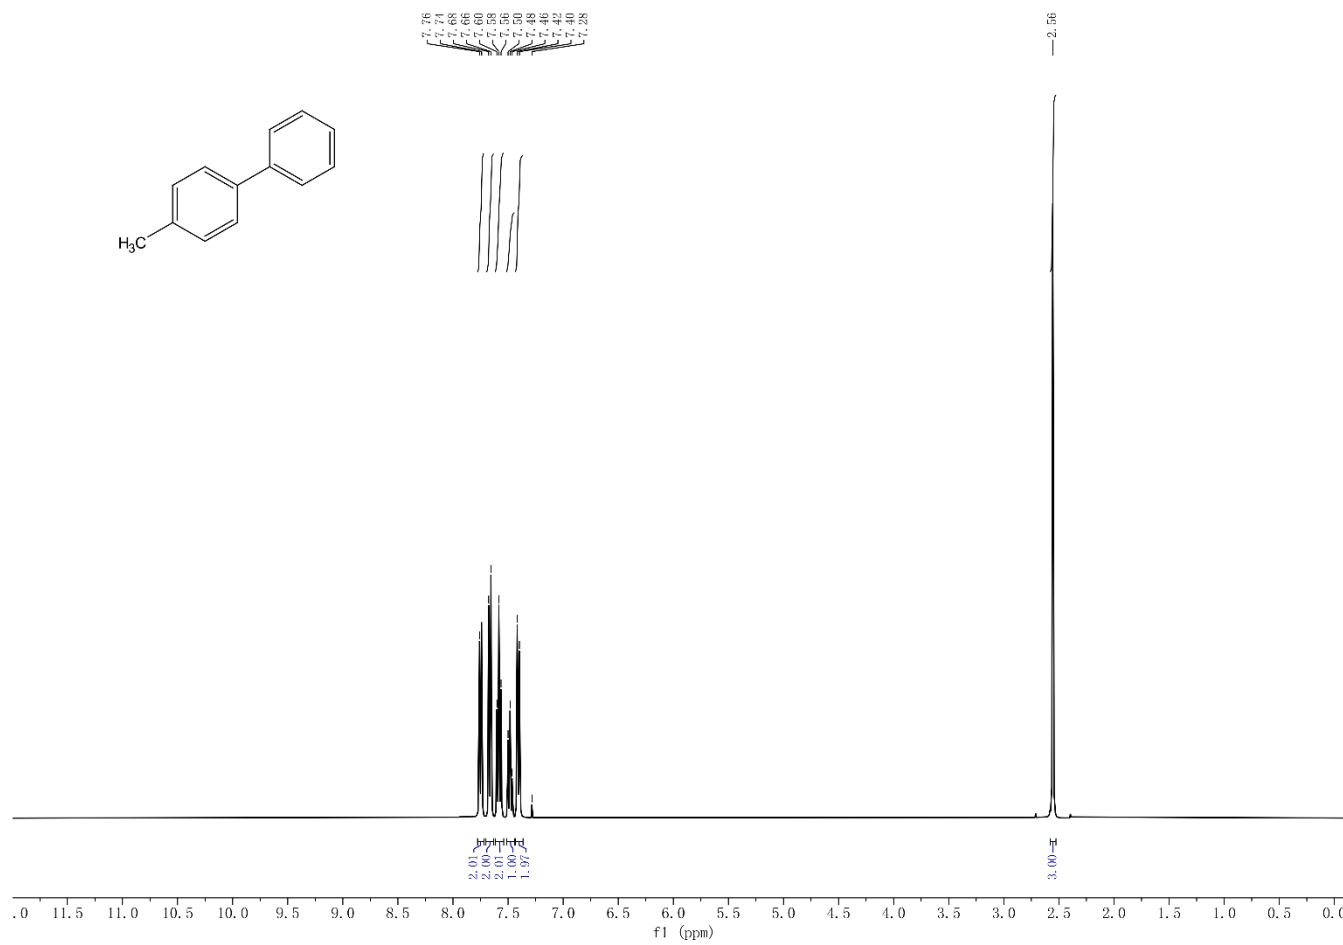



$^{13}\text{C}\{^1\text{H}\}$  NMR (101 MHz,  $\text{CDCl}_3$ ) spectrum of 8a

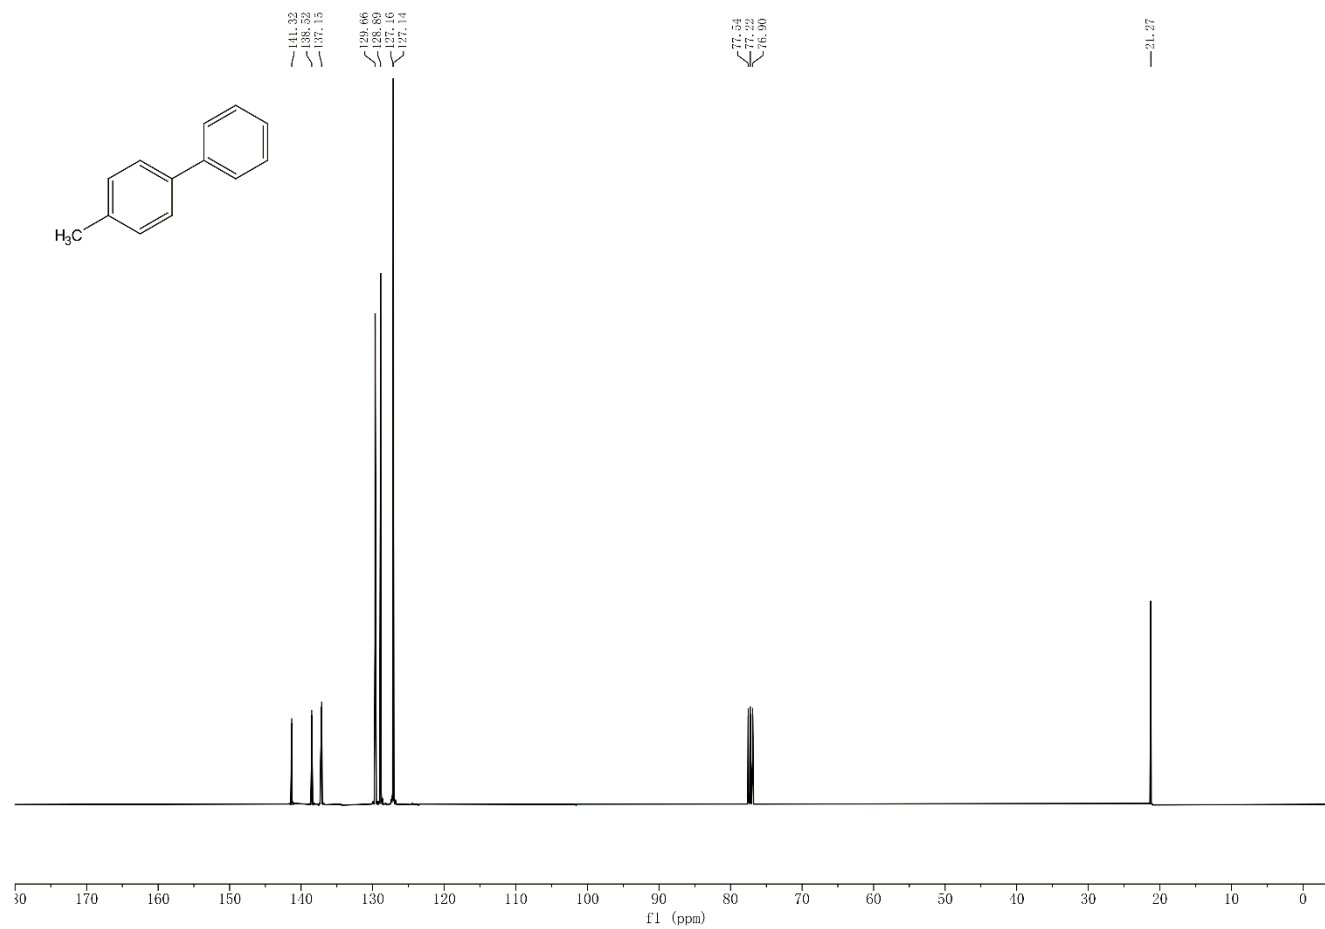

<sup>1</sup>H NMR (400 MHz, CDCl<sub>3</sub>) spectrum of 8b

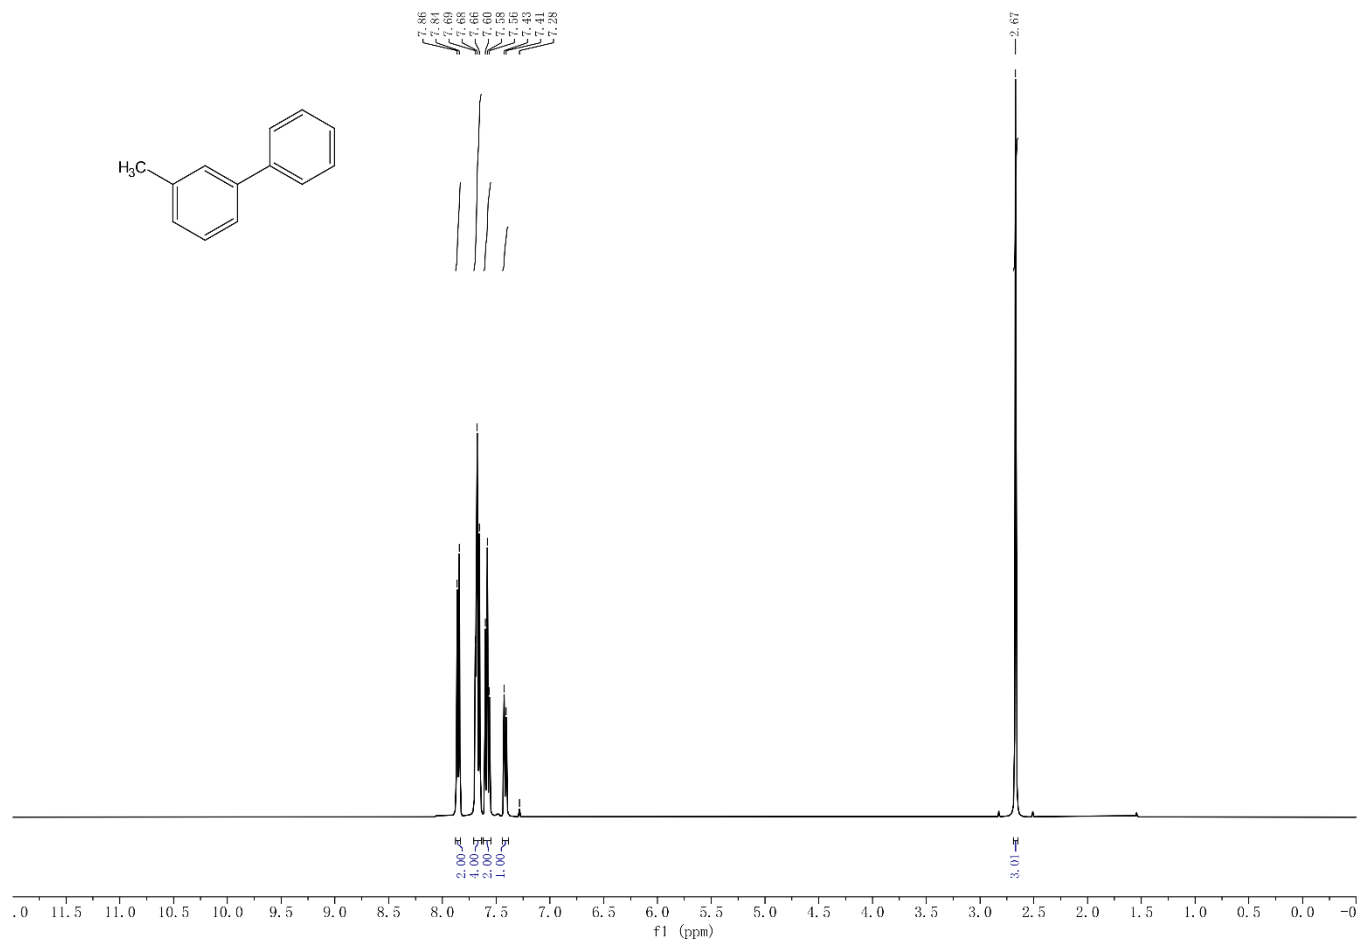

$^{13}\text{C}\{^1\text{H}\}$  NMR (101 MHz,  $\text{CDCl}_3$ ) spectrum of 8b

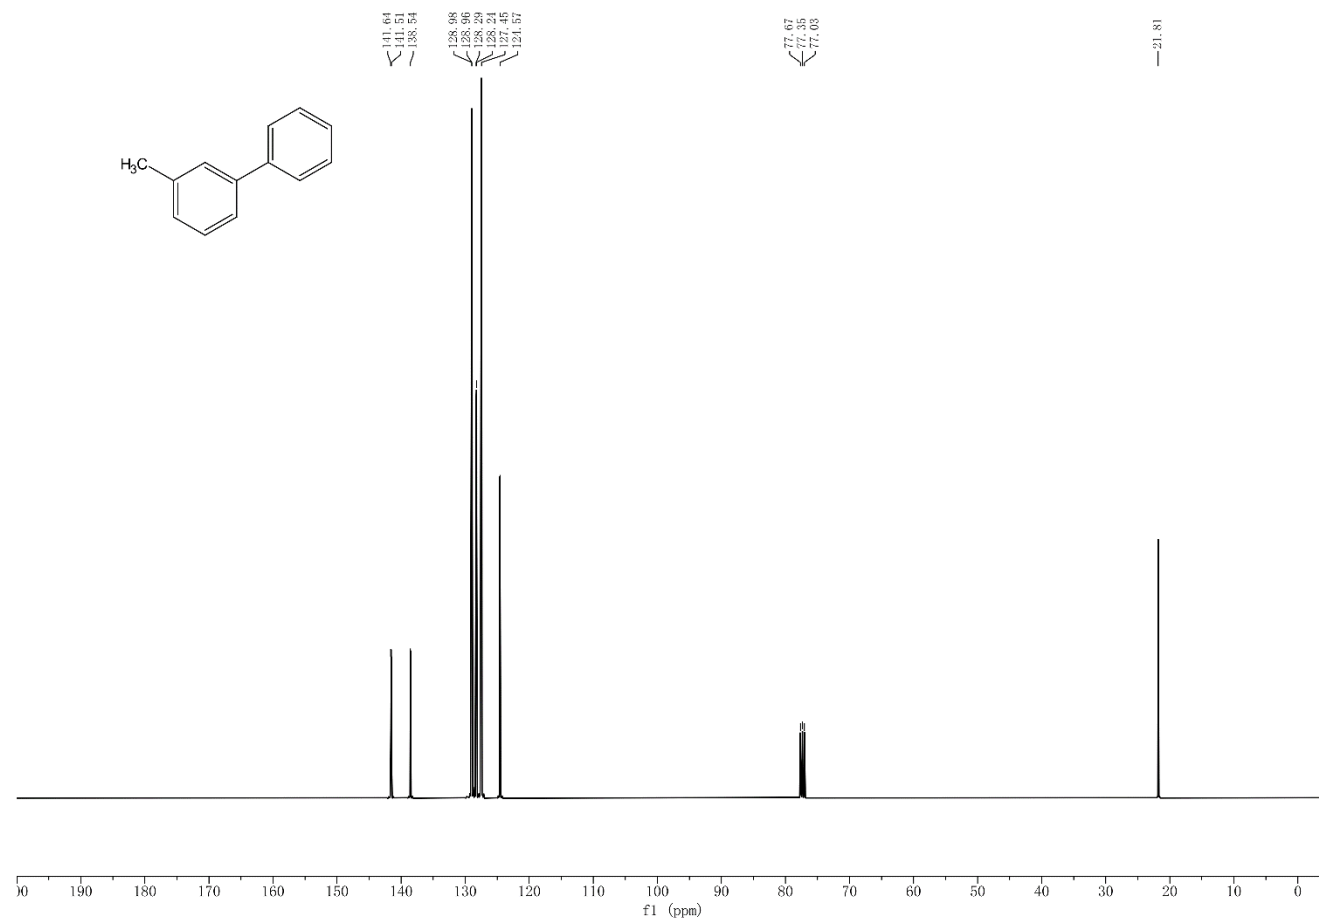

<sup>1</sup>H NMR (400 MHz, CDCl<sub>3</sub>) spectrum of 8c

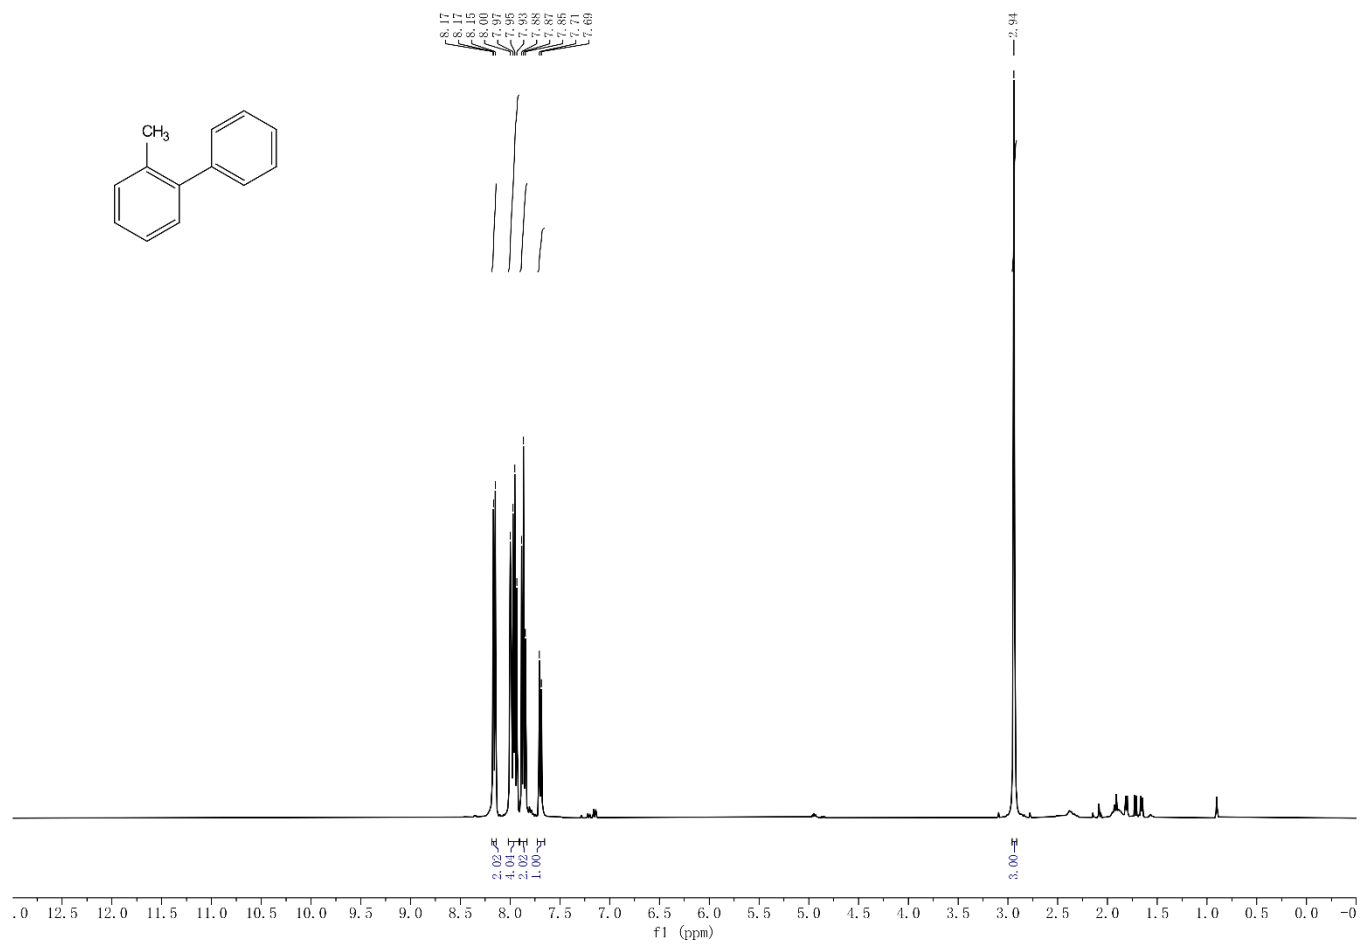

$^{13}\text{C}\{^1\text{H}\}$  NMR (101 MHz,  $\text{CDCl}_3$ ) spectrum of 8c

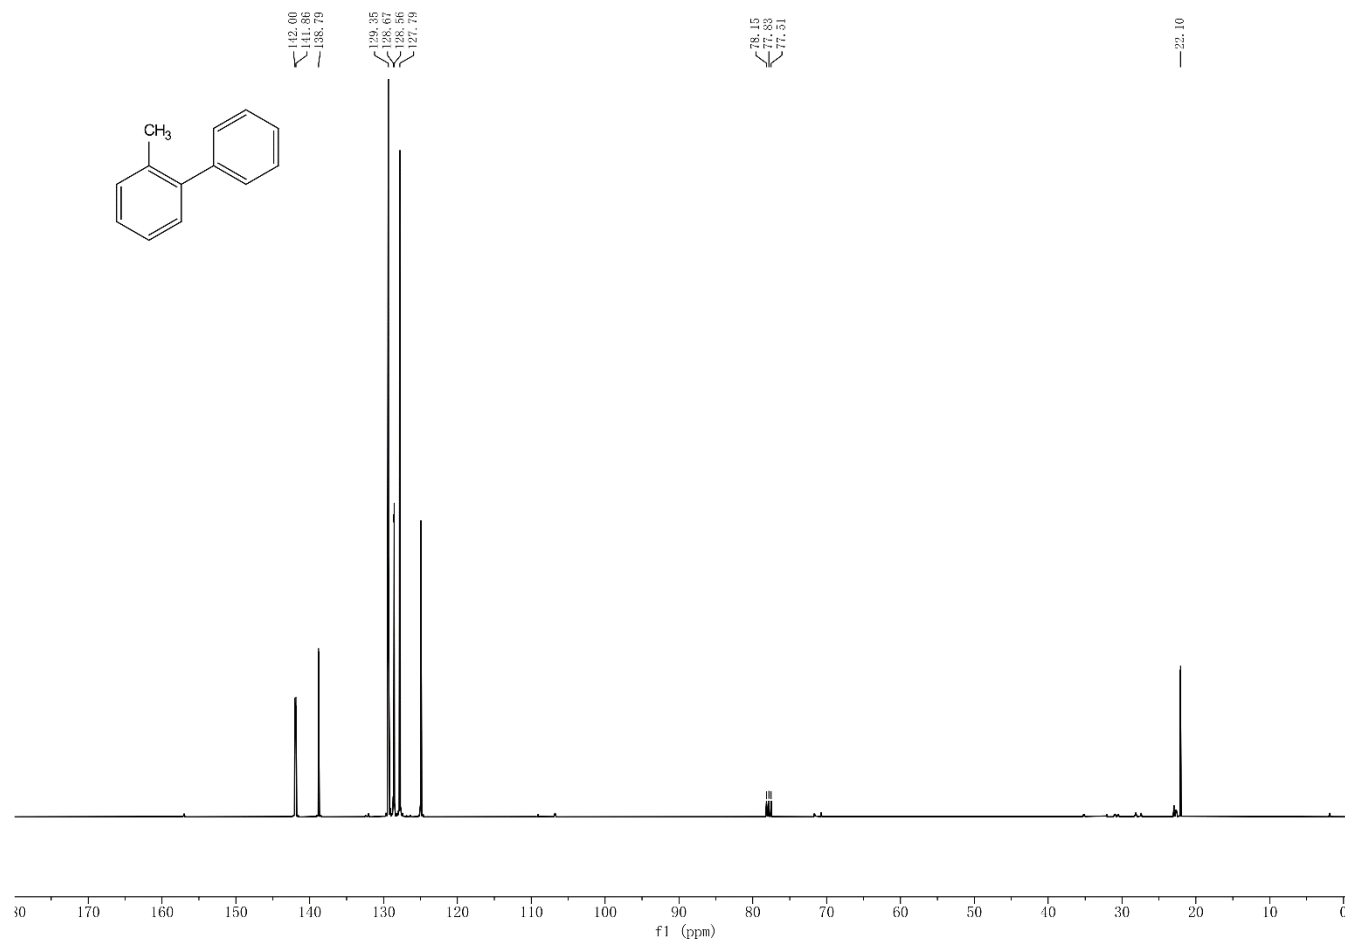

<sup>1</sup>H NMR (400 MHz, CDCl<sub>3</sub>) spectrum of 8d

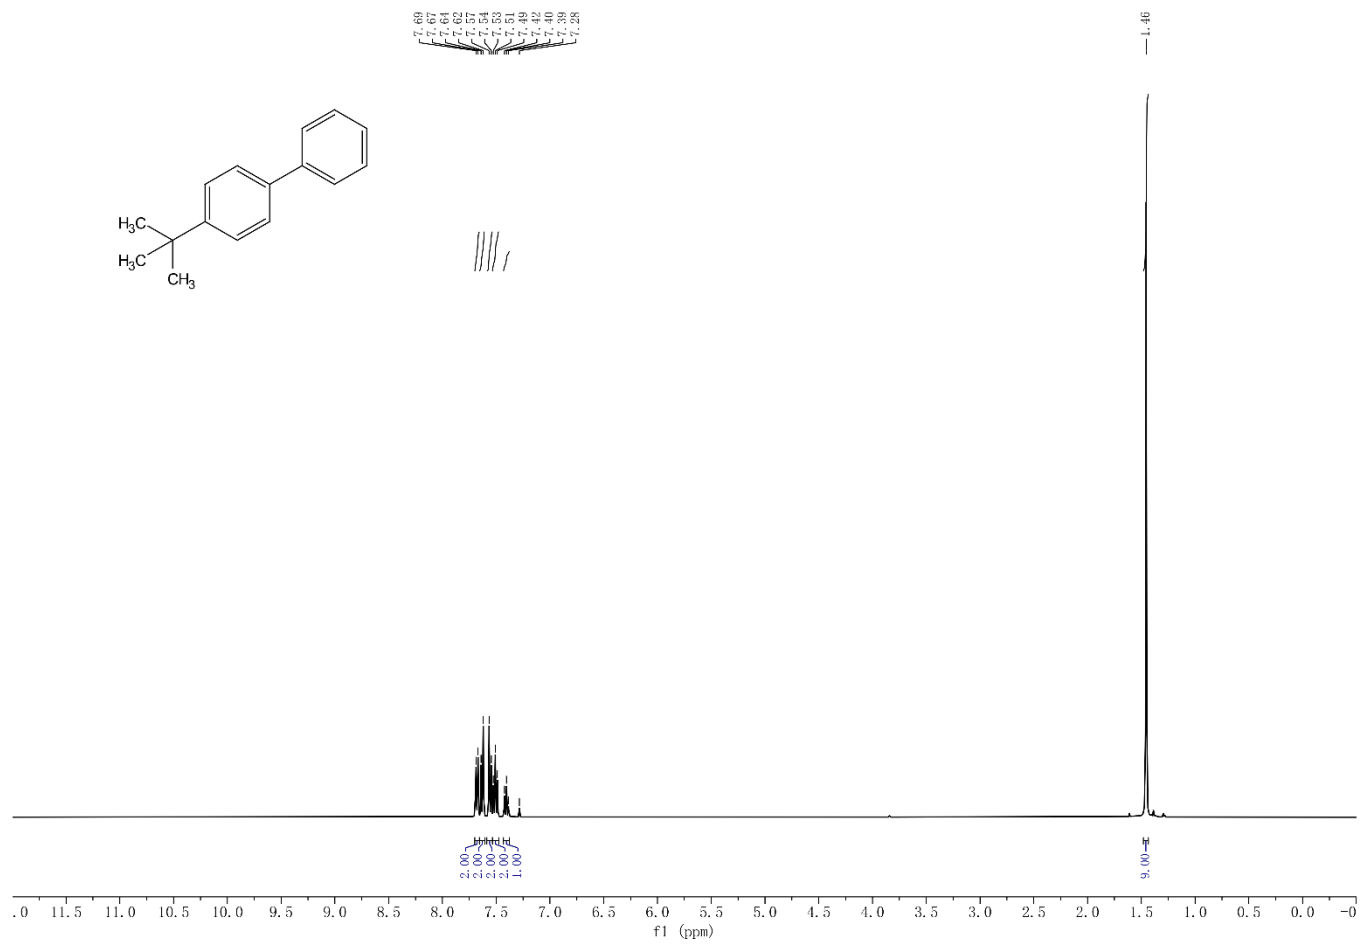

$^{13}\text{C}\{^1\text{H}\}$  NMR (101 MHz,  $\text{CDCl}_3$ ) spectrum of 8d

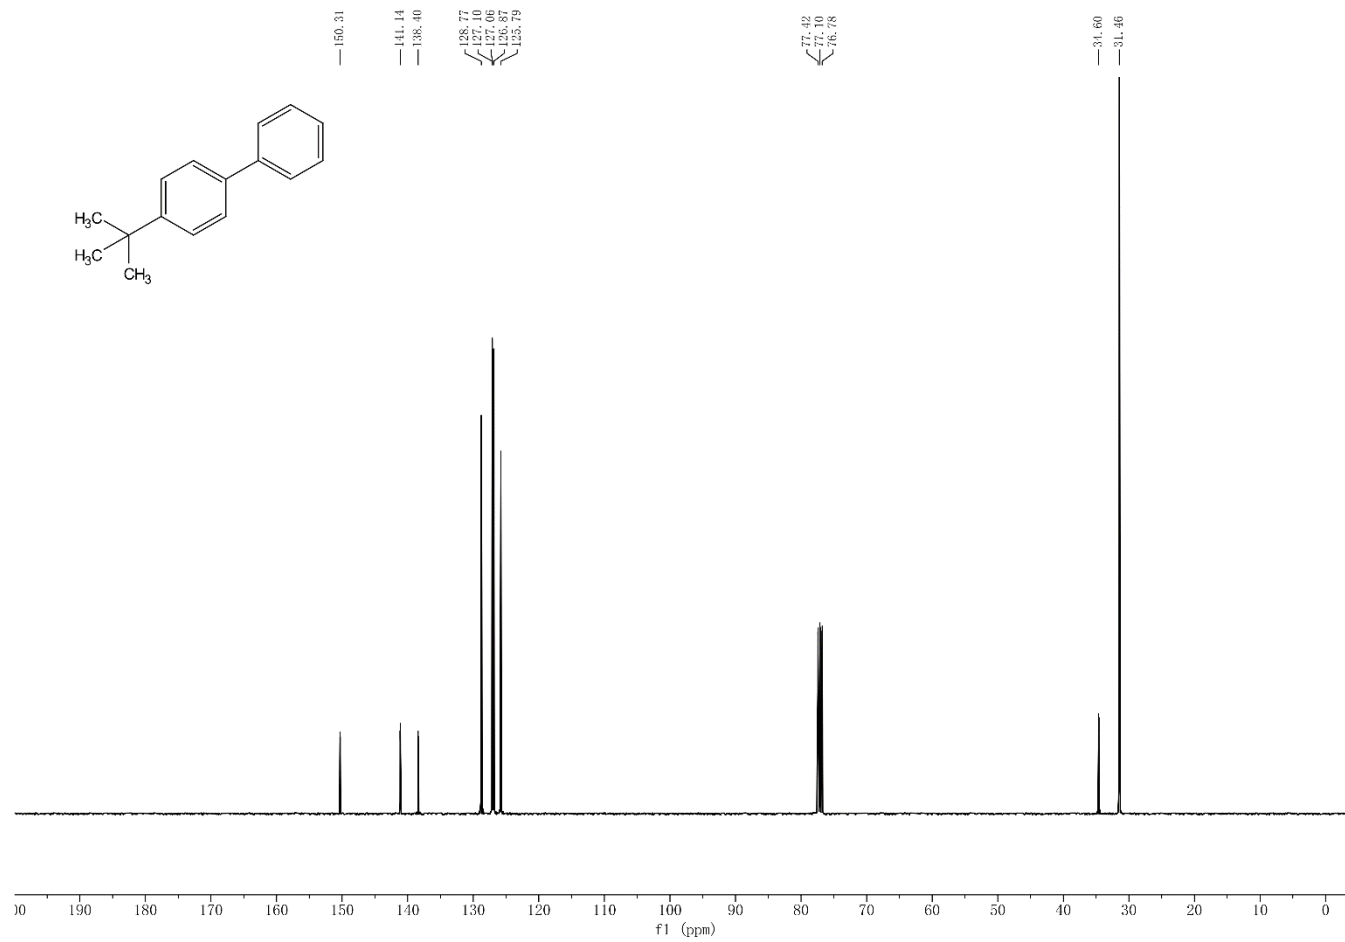

<sup>1</sup>H NMR (400 MHz, CDCl<sub>3</sub>) spectrum of 8e

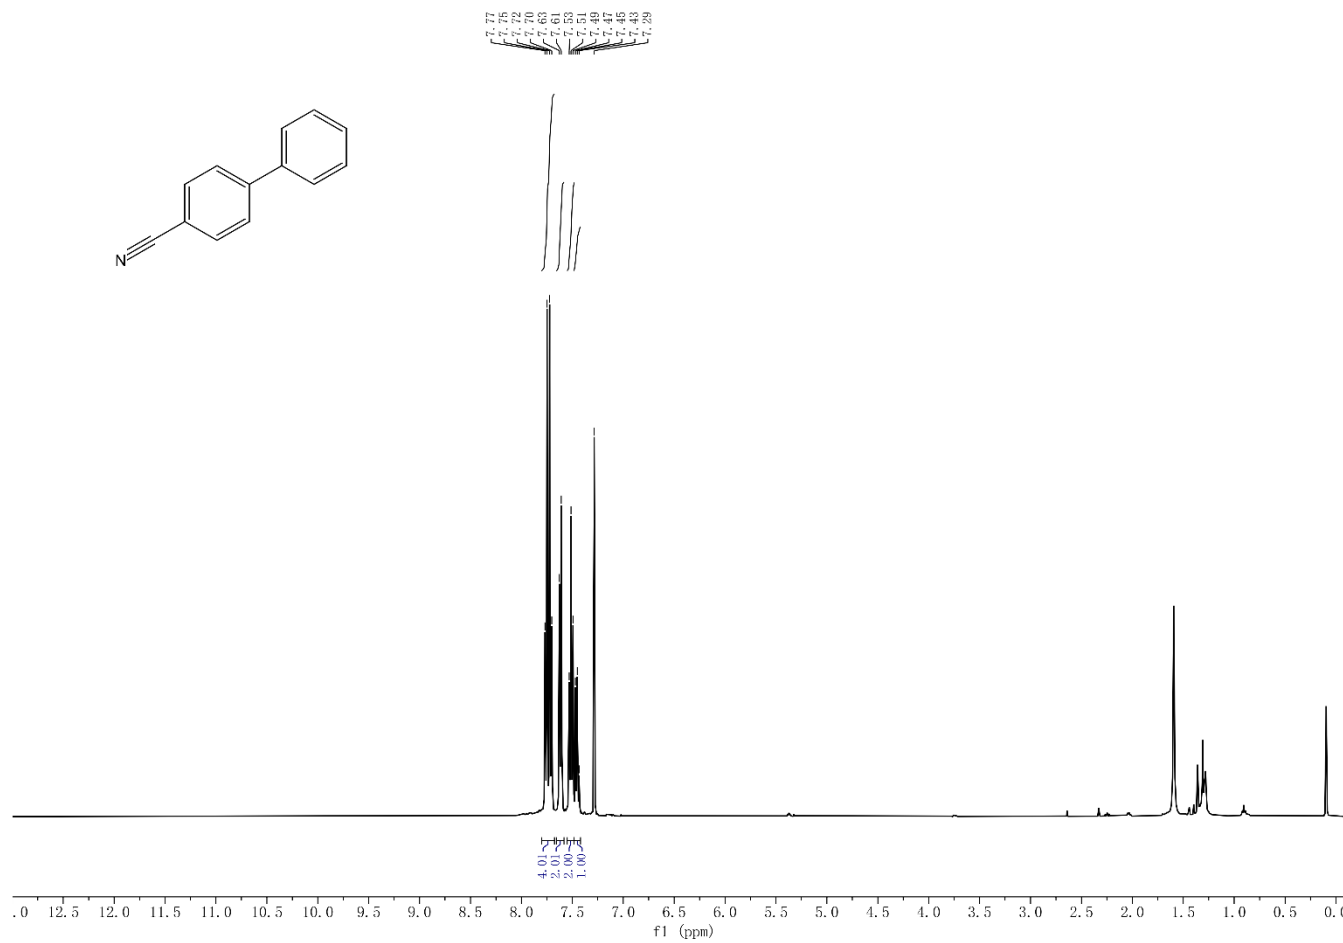



$^{13}\text{C}\{^1\text{H}\}$  NMR (101 MHz,  $\text{CDCl}_3$ ) spectrum of 8e

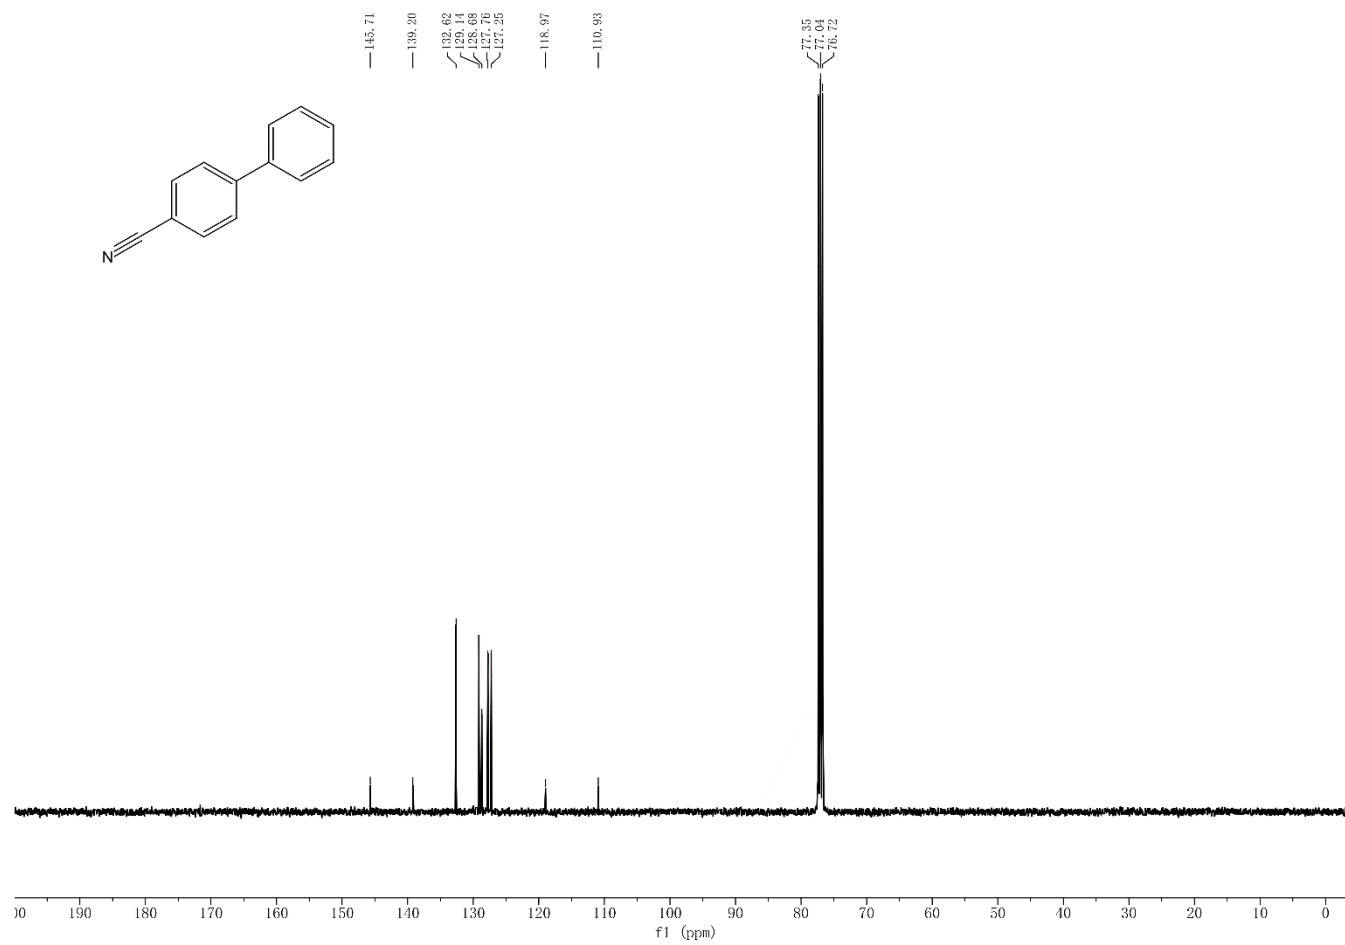

<sup>1</sup>H NMR (400 MHz, CDCl<sub>3</sub>) spectrum of 8f

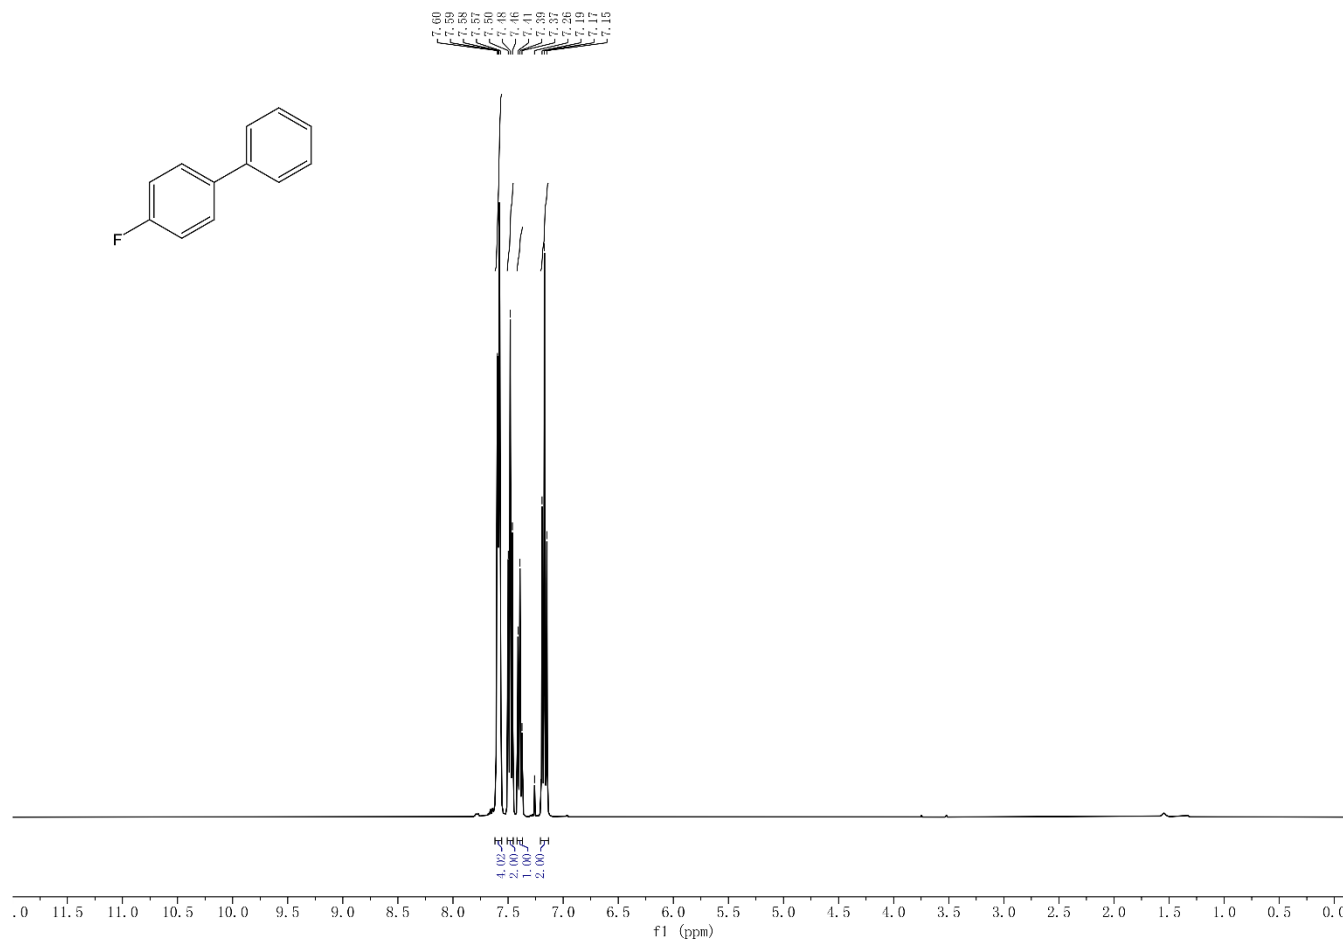

$^{13}\text{C}\{^1\text{H}\}$  NMR (101 MHz,  $\text{CDCl}_3$ ) spectrum of 8f

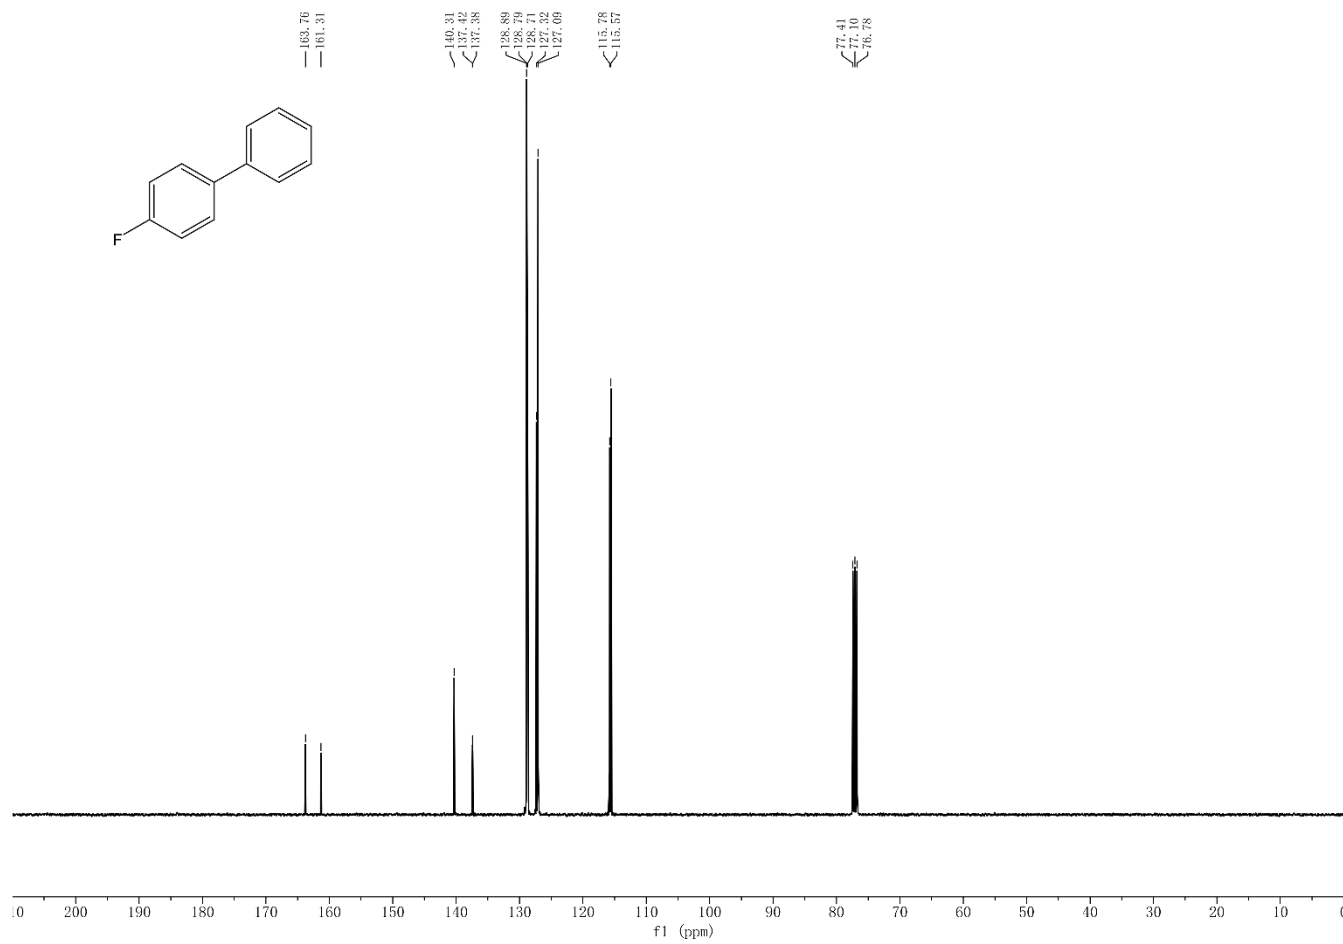

<sup>19</sup>F NMR (377 MHz, CDCl<sub>3</sub>) spectrum of 8f

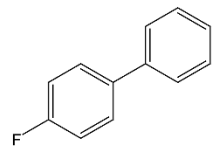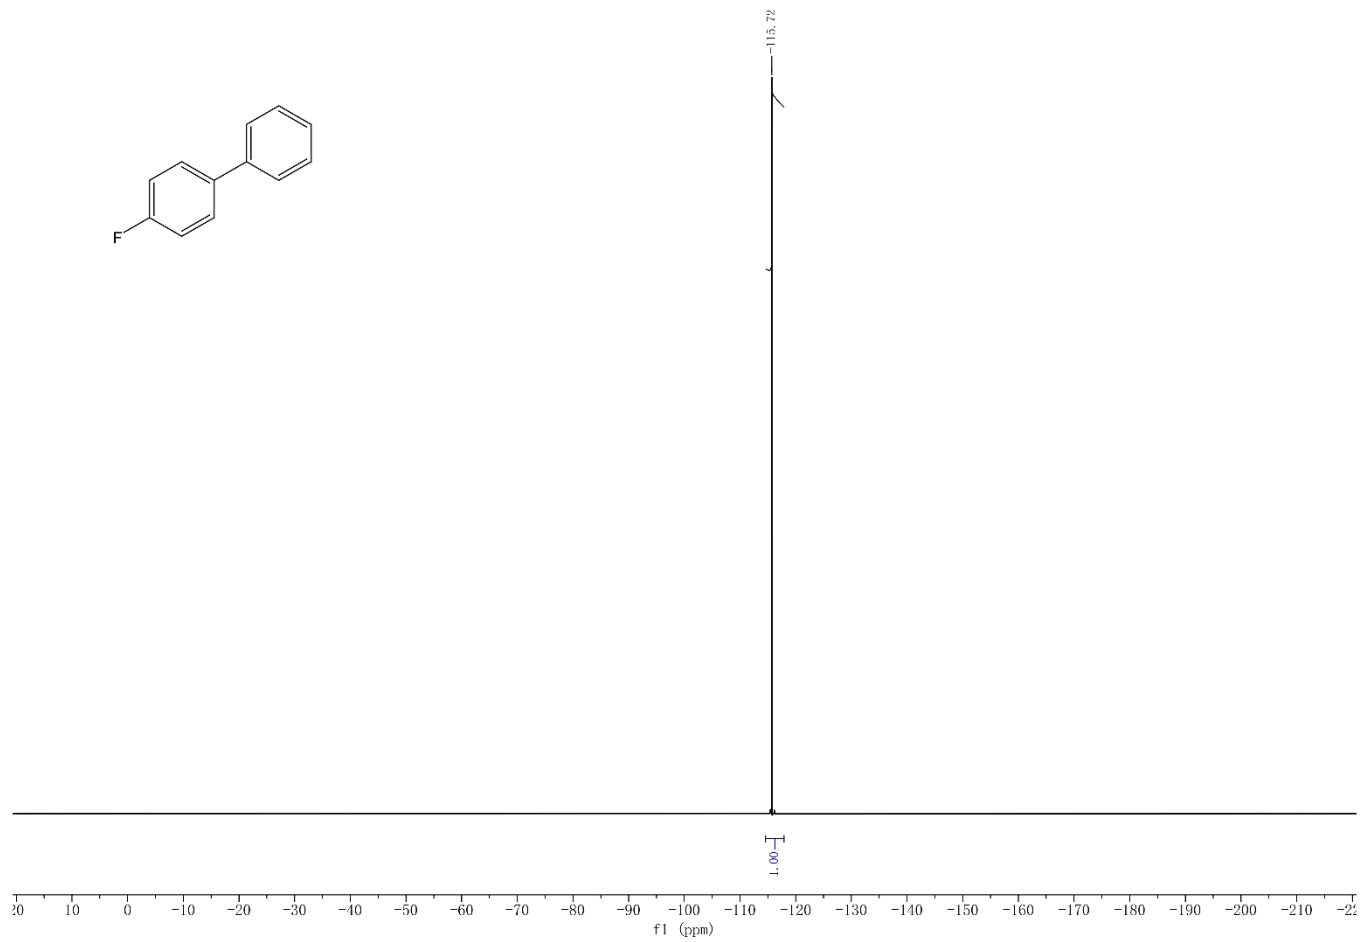

<sup>1</sup>H NMR (400 MHz, CDCl<sub>3</sub>) spectrum of 8g

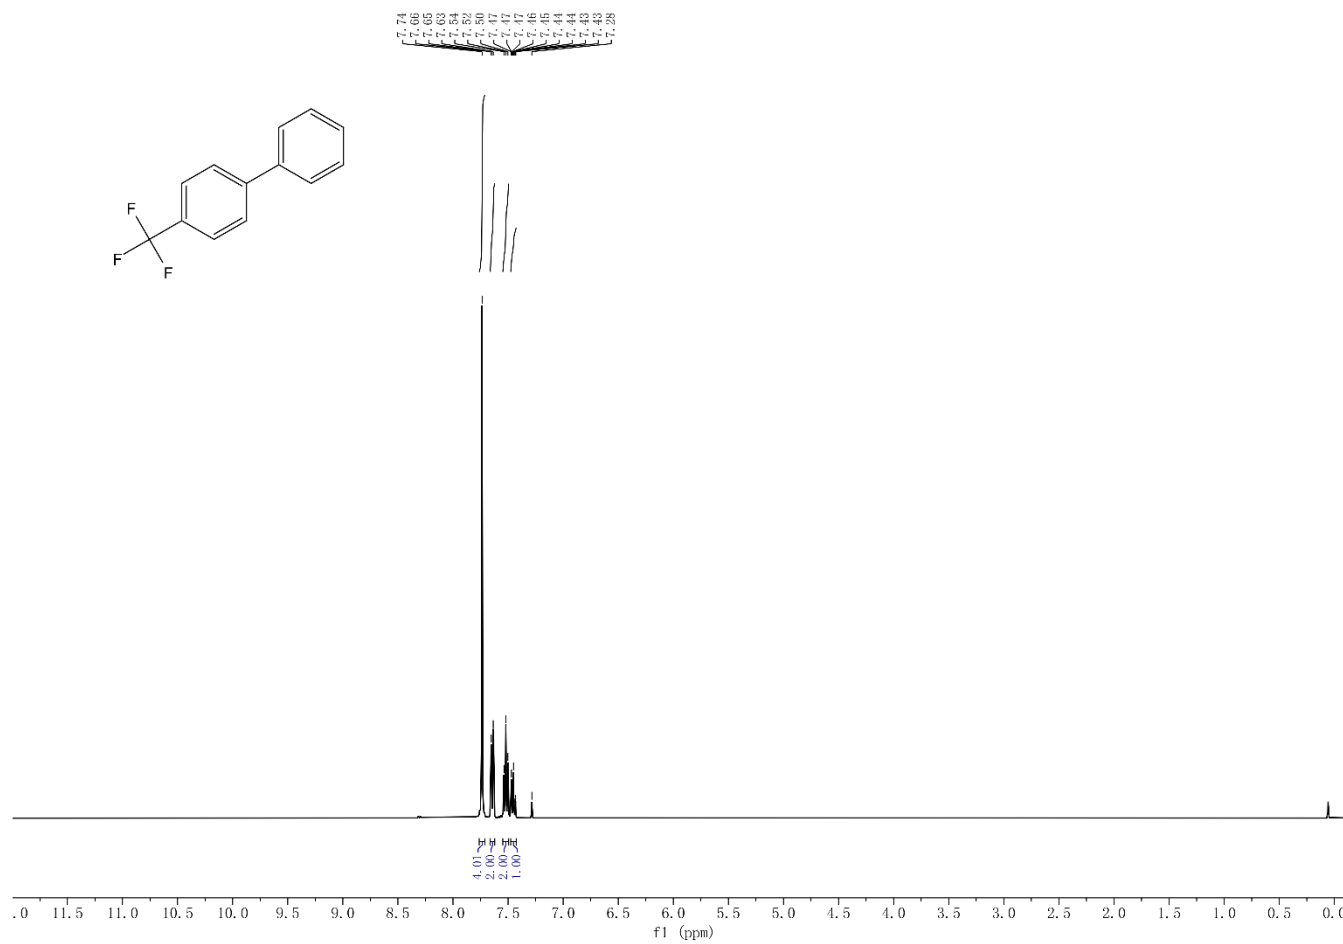

$^{13}\text{C}\{^1\text{H}\}$  NMR (101 MHz,  $\text{CDCl}_3$ ) spectrum of 8g

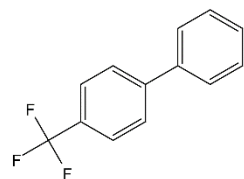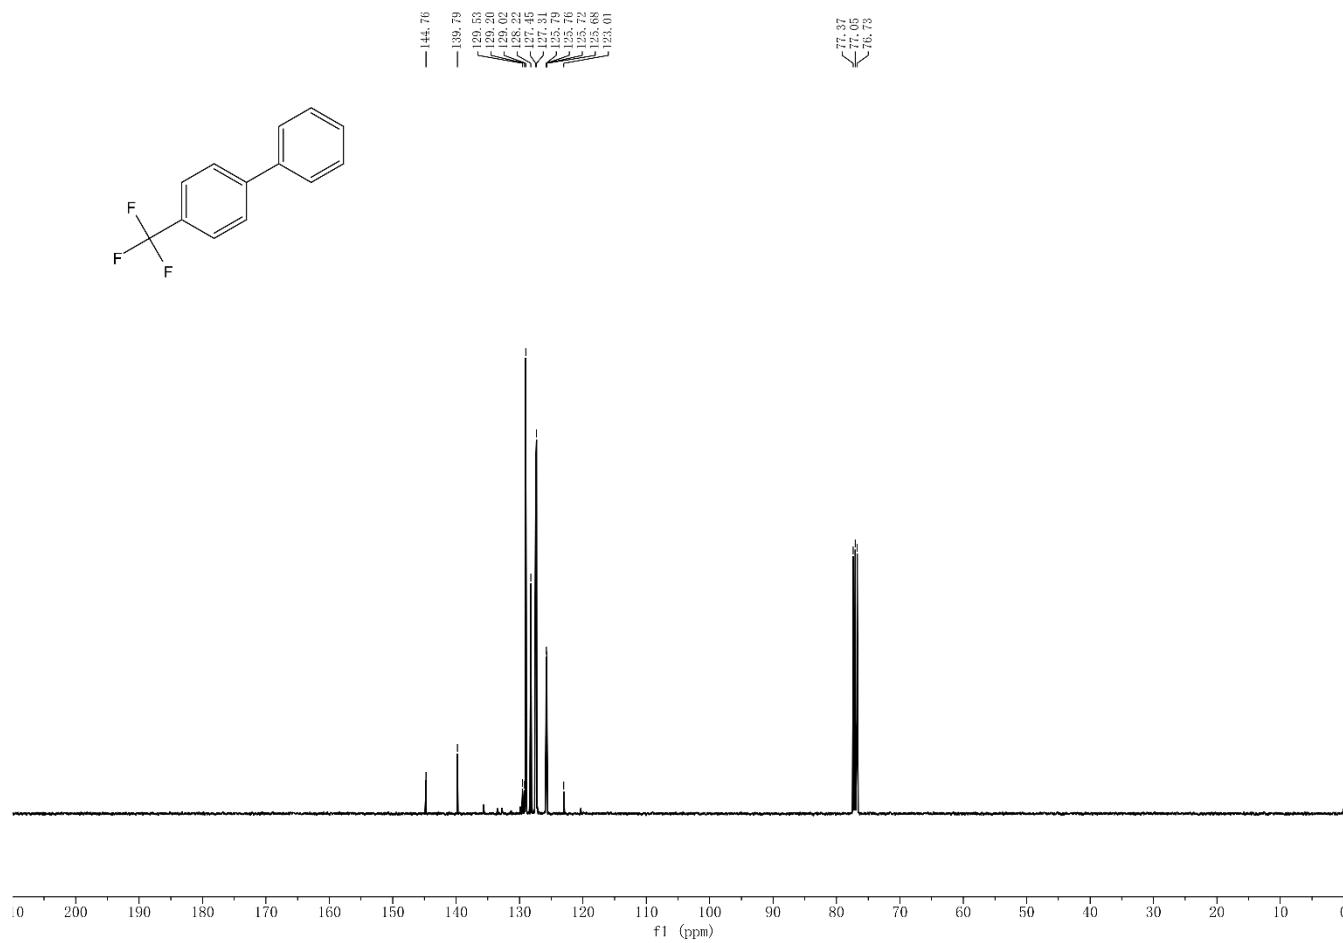

<sup>19</sup>F NMR (377 MHz, CDCl<sub>3</sub>) spectrum of 8g

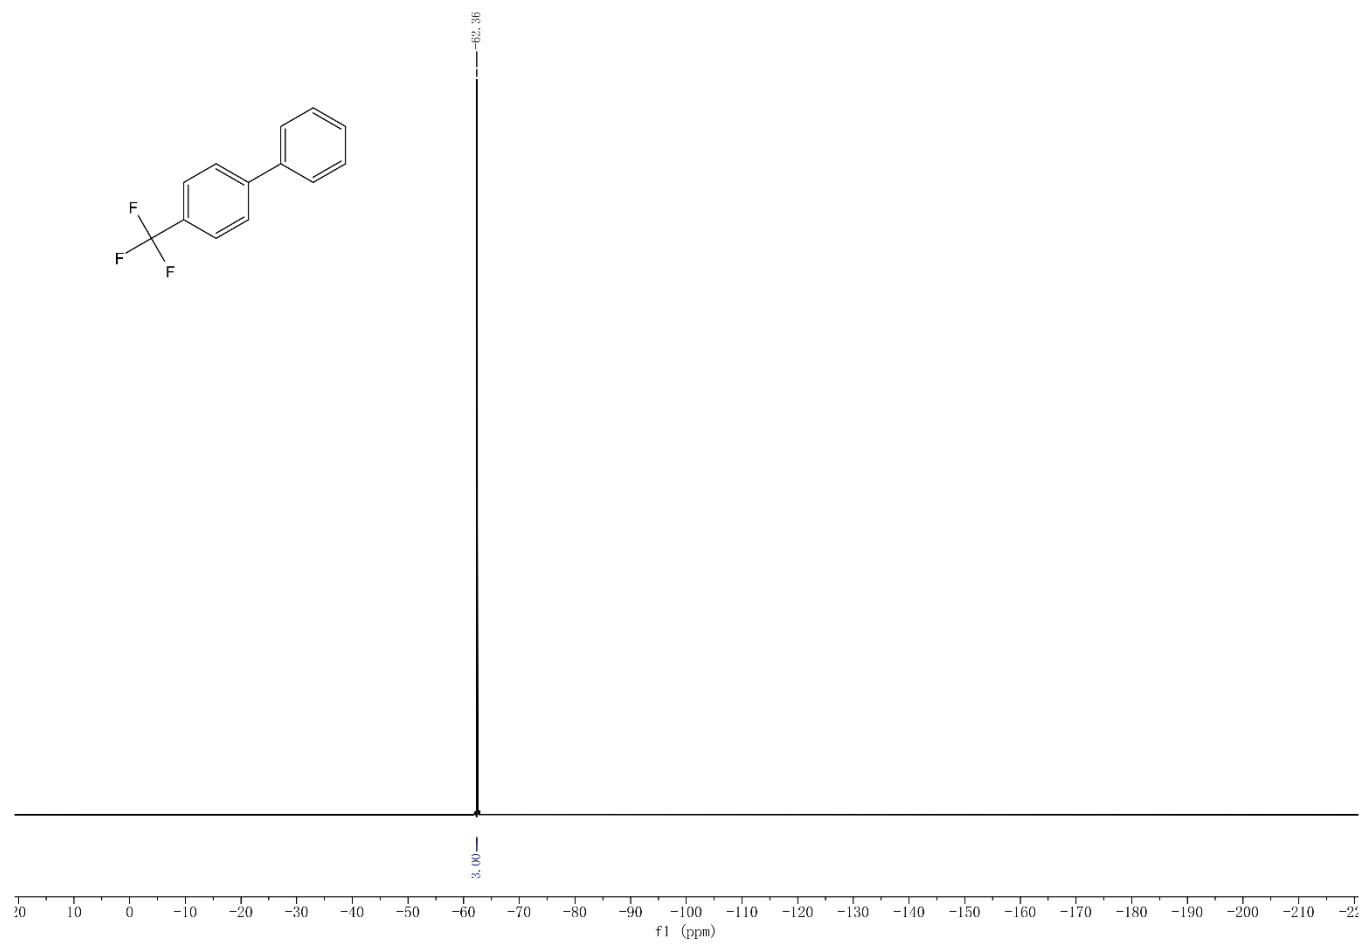

<sup>1</sup>H NMR (400 MHz, CDCl<sub>3</sub>) spectrum of 8h

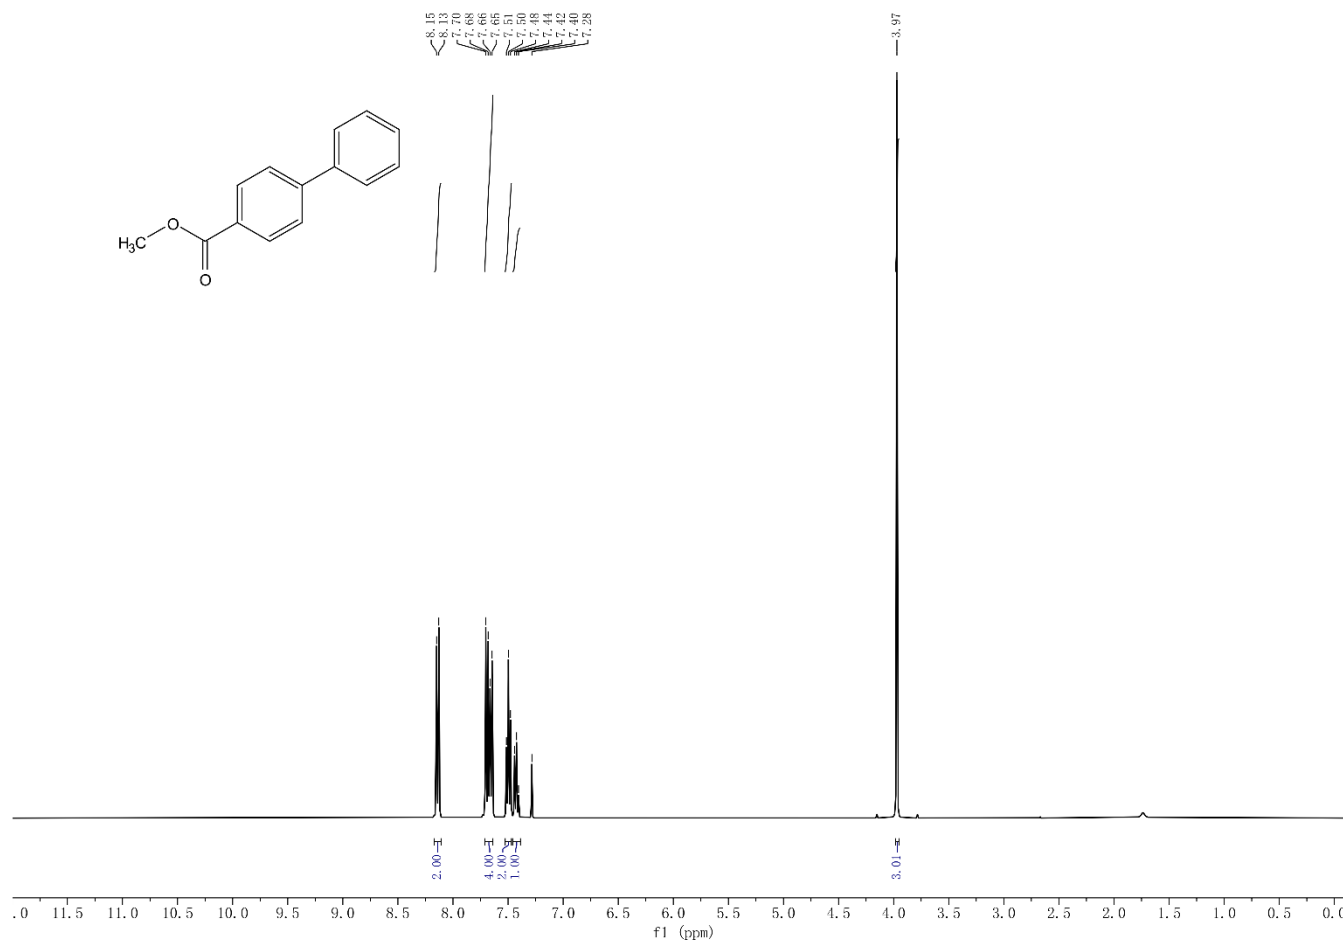



$^{13}\text{C}\{^1\text{H}\}$  NMR (101 MHz,  $\text{CDCl}_3$ ) spectrum of 8h

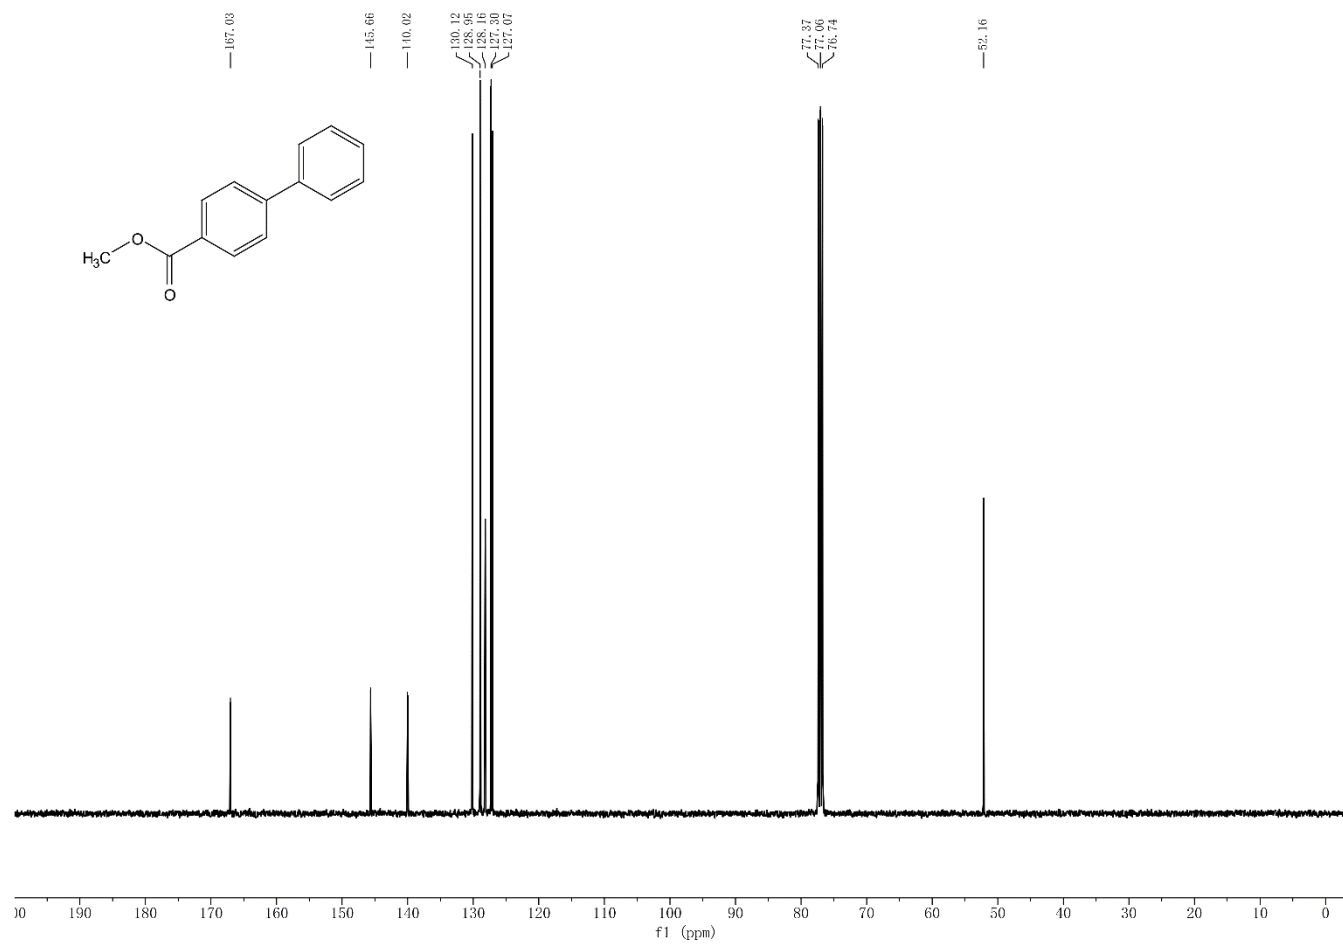

<sup>1</sup>H NMR (400 MHz, CDCl<sub>3</sub>) spectrum of 8l

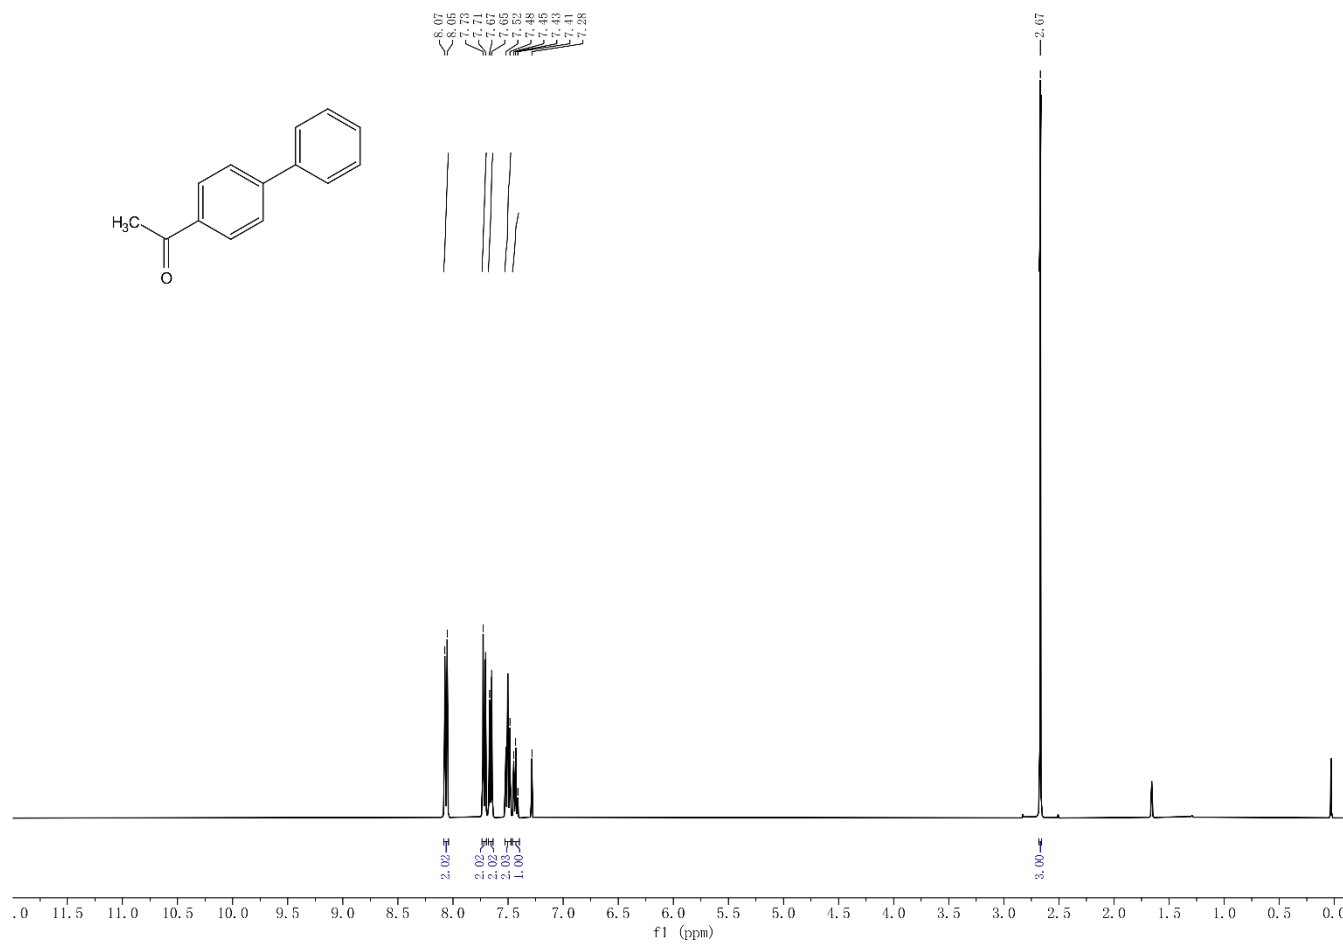

$^{13}\text{C}\{^1\text{H}\}$  NMR (101 MHz,  $\text{CDCl}_3$ ) spectrum of 8l

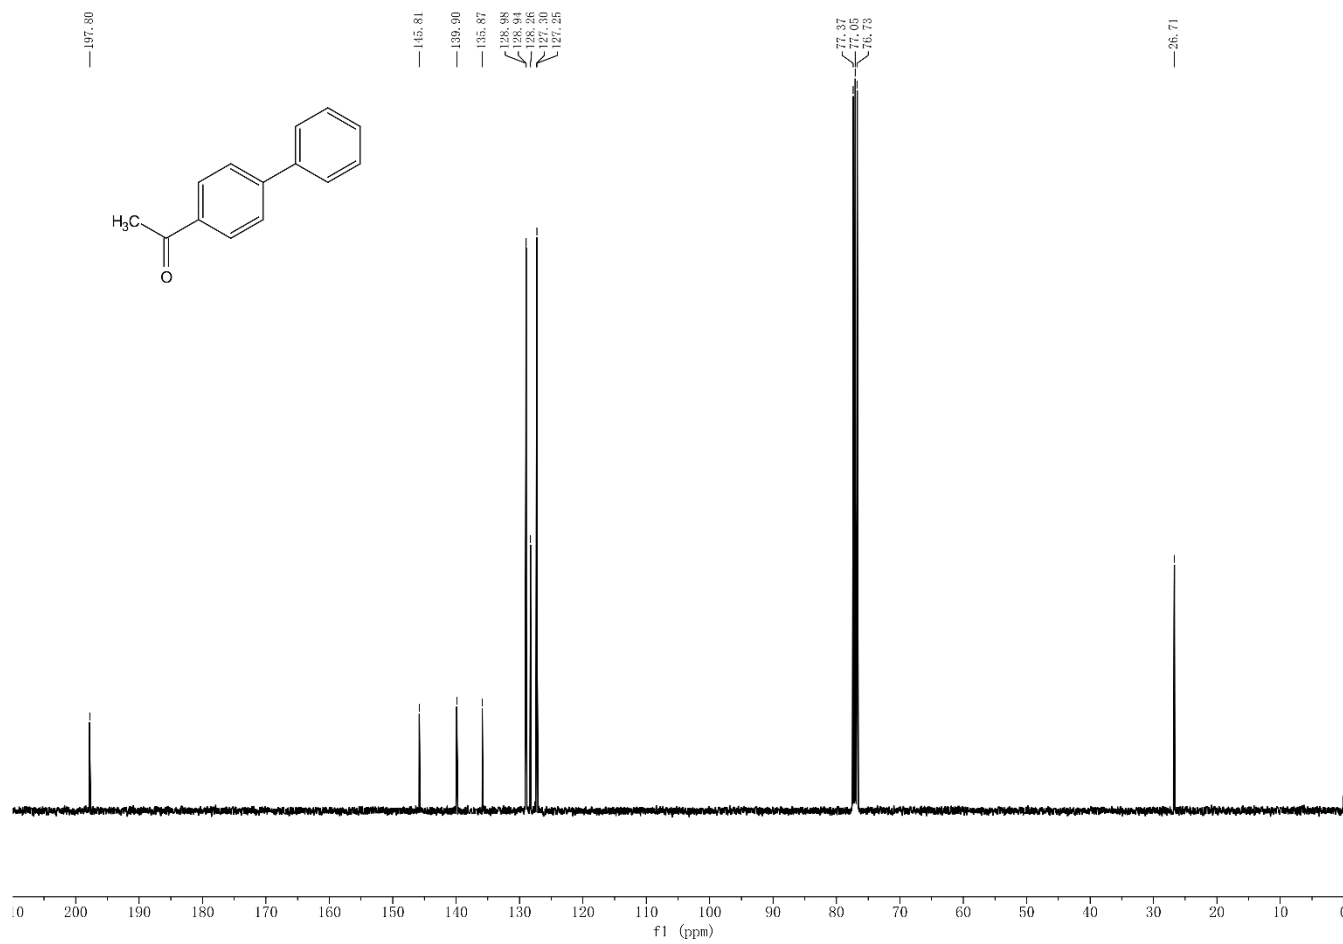

<sup>1</sup>H NMR (400 MHz, CDCl<sub>3</sub>) spectrum of 8j

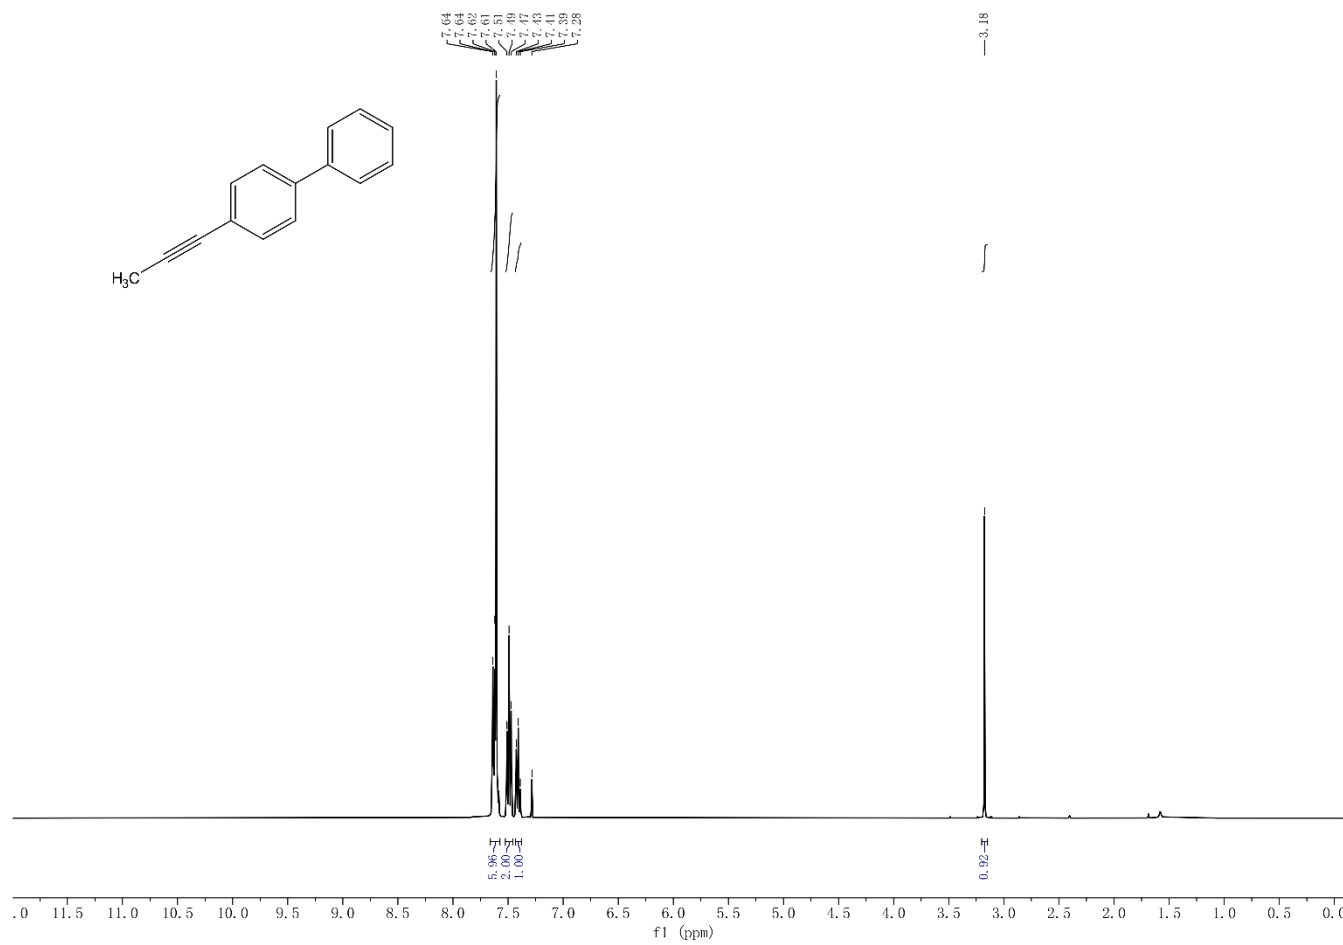

$^{13}\text{C}\{^1\text{H}\}$  NMR (101 MHz,  $\text{CDCl}_3$ ) spectrum of 8j

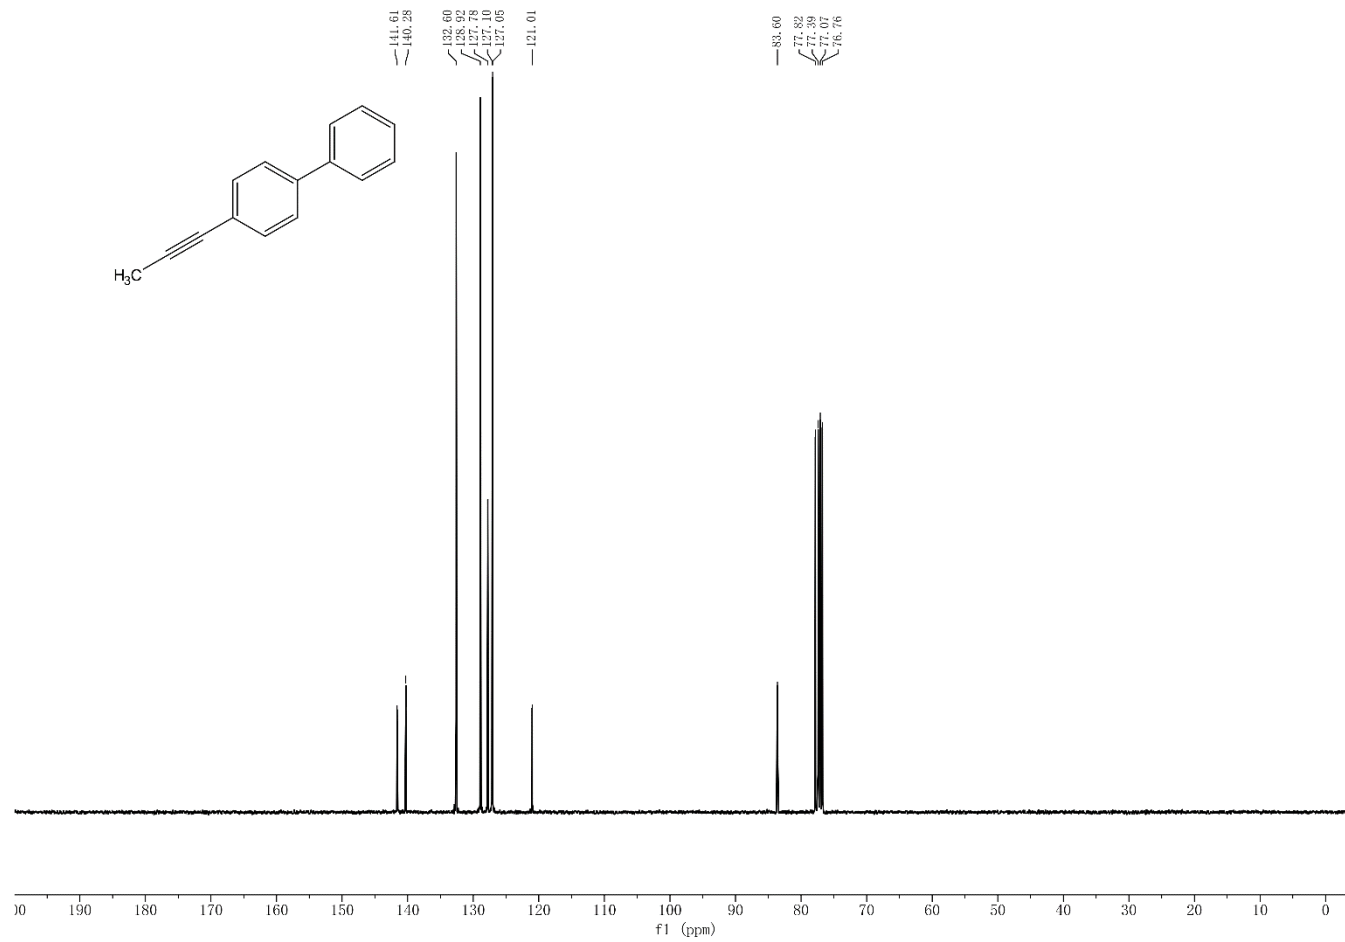

<sup>1</sup>H NMR (400 MHz, CDCl<sub>3</sub>) spectrum of 8k

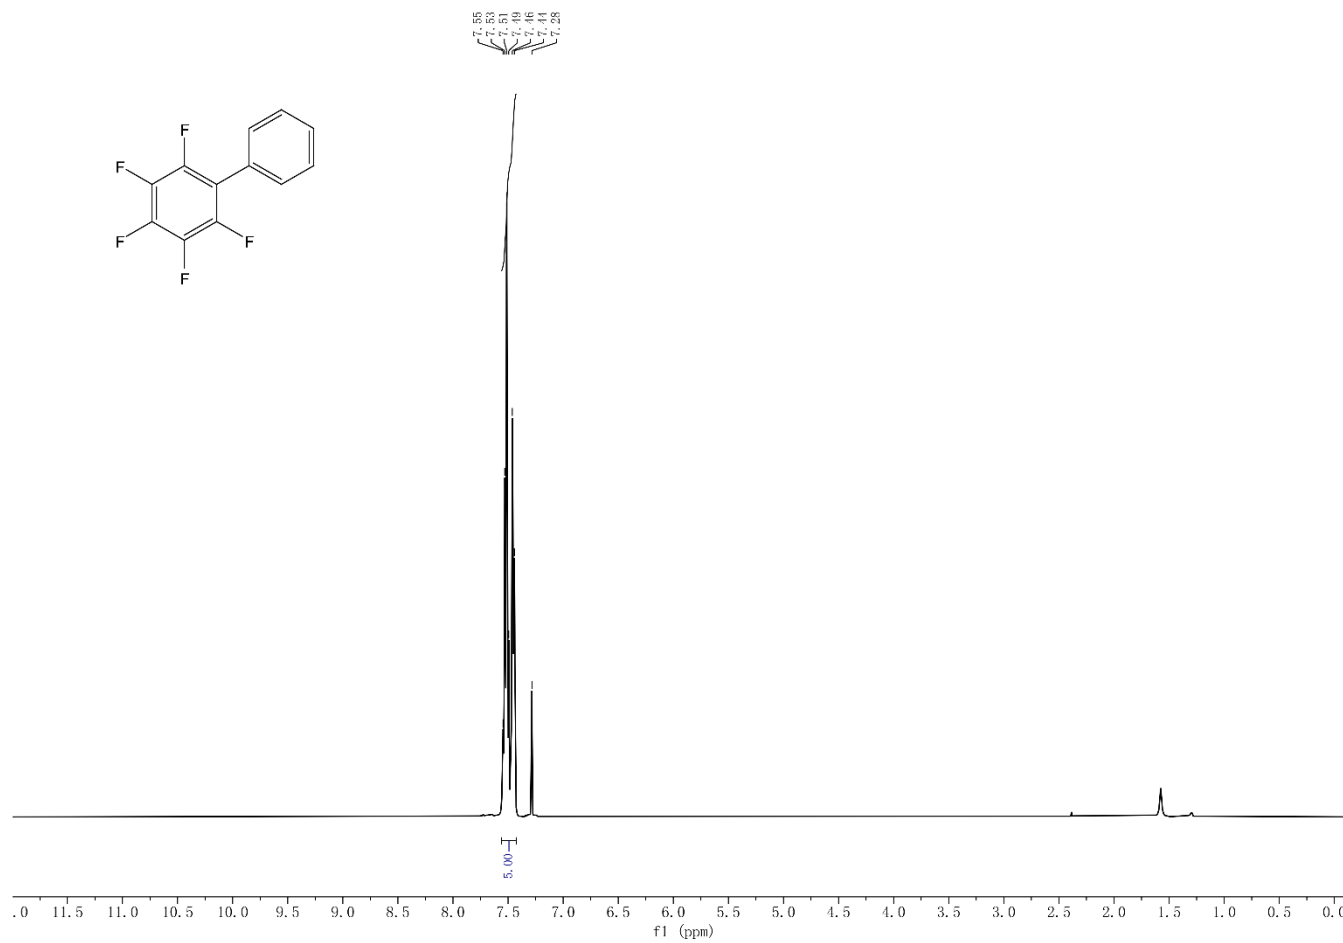

$^{13}\text{C}\{^1\text{H}\}$  NMR (101 MHz,  $\text{CDCl}_3$ ) spectrum of 8k

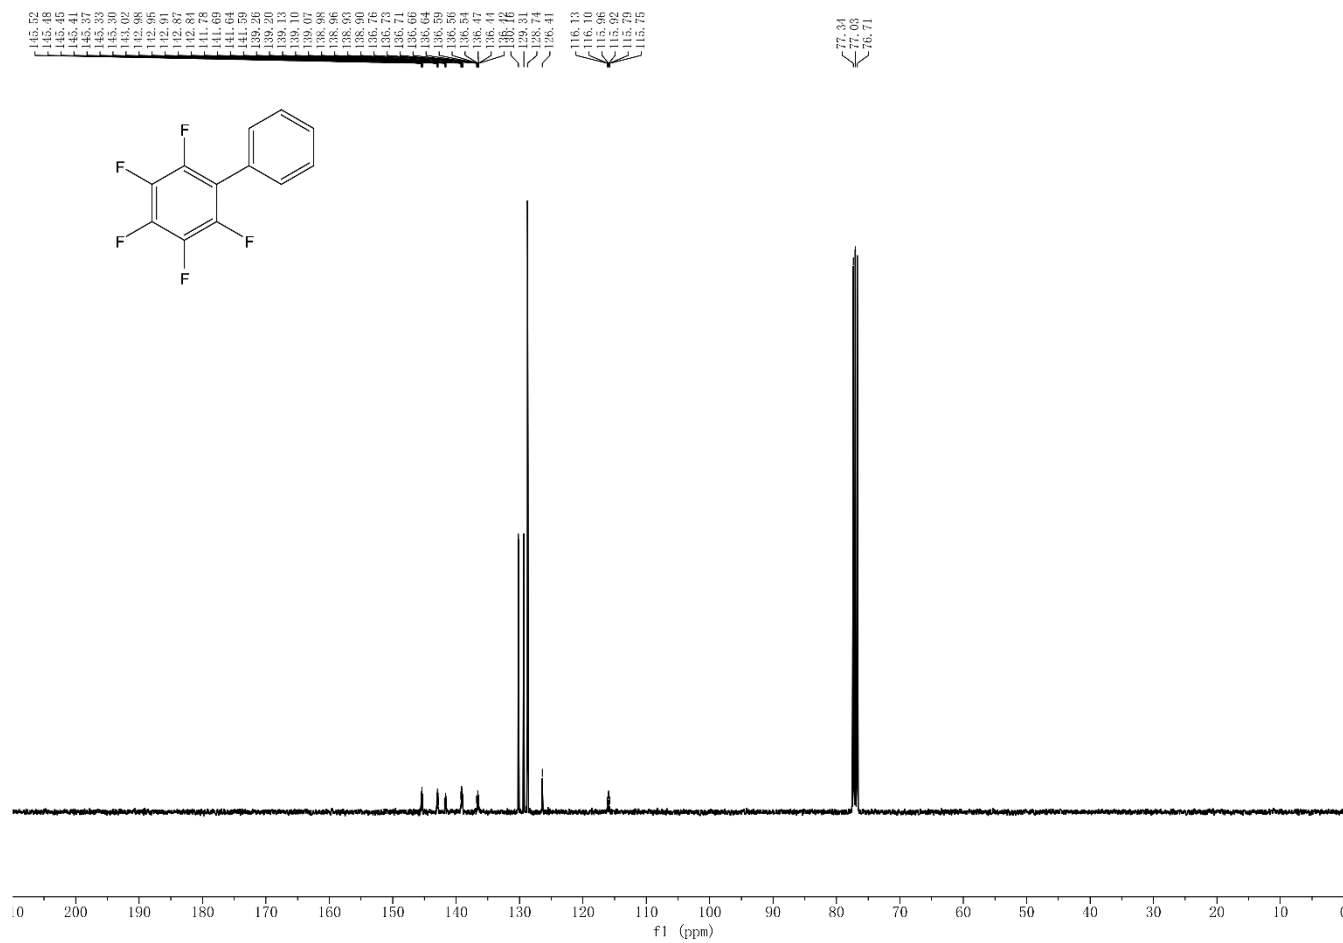

<sup>19</sup>F NMR (377 MHz, CDCl<sub>3</sub>) spectrum of 8k

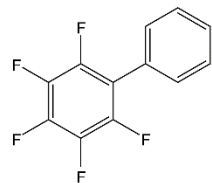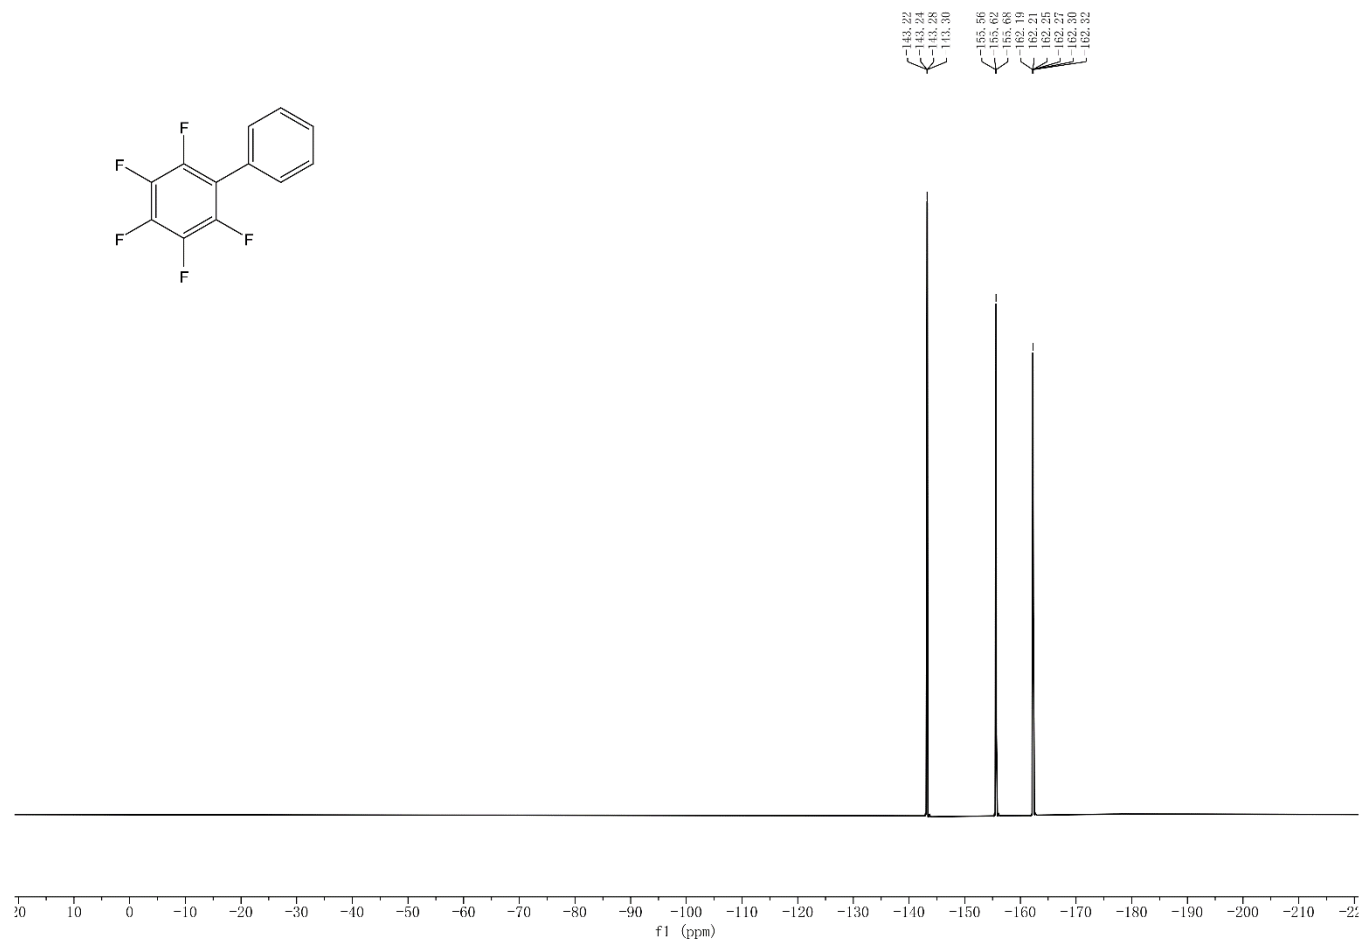



<sup>1</sup>H NMR (400 MHz, CDCl<sub>3</sub>) spectrum of 8l

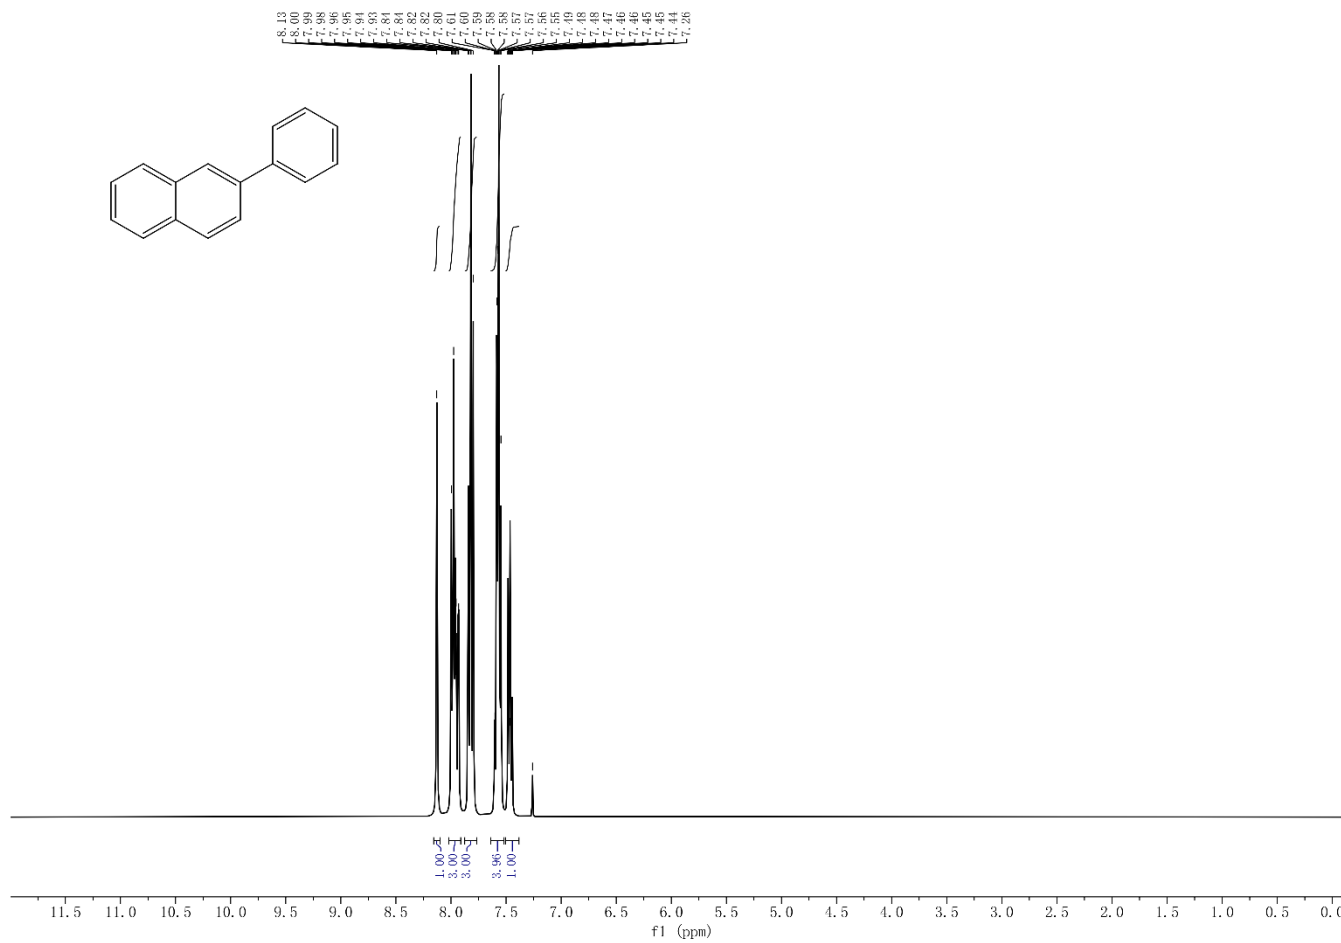

$^{13}\text{C}\{^1\text{H}\}$  NMR (101 MHz,  $\text{CDCl}_3$ ) spectrum of 8l

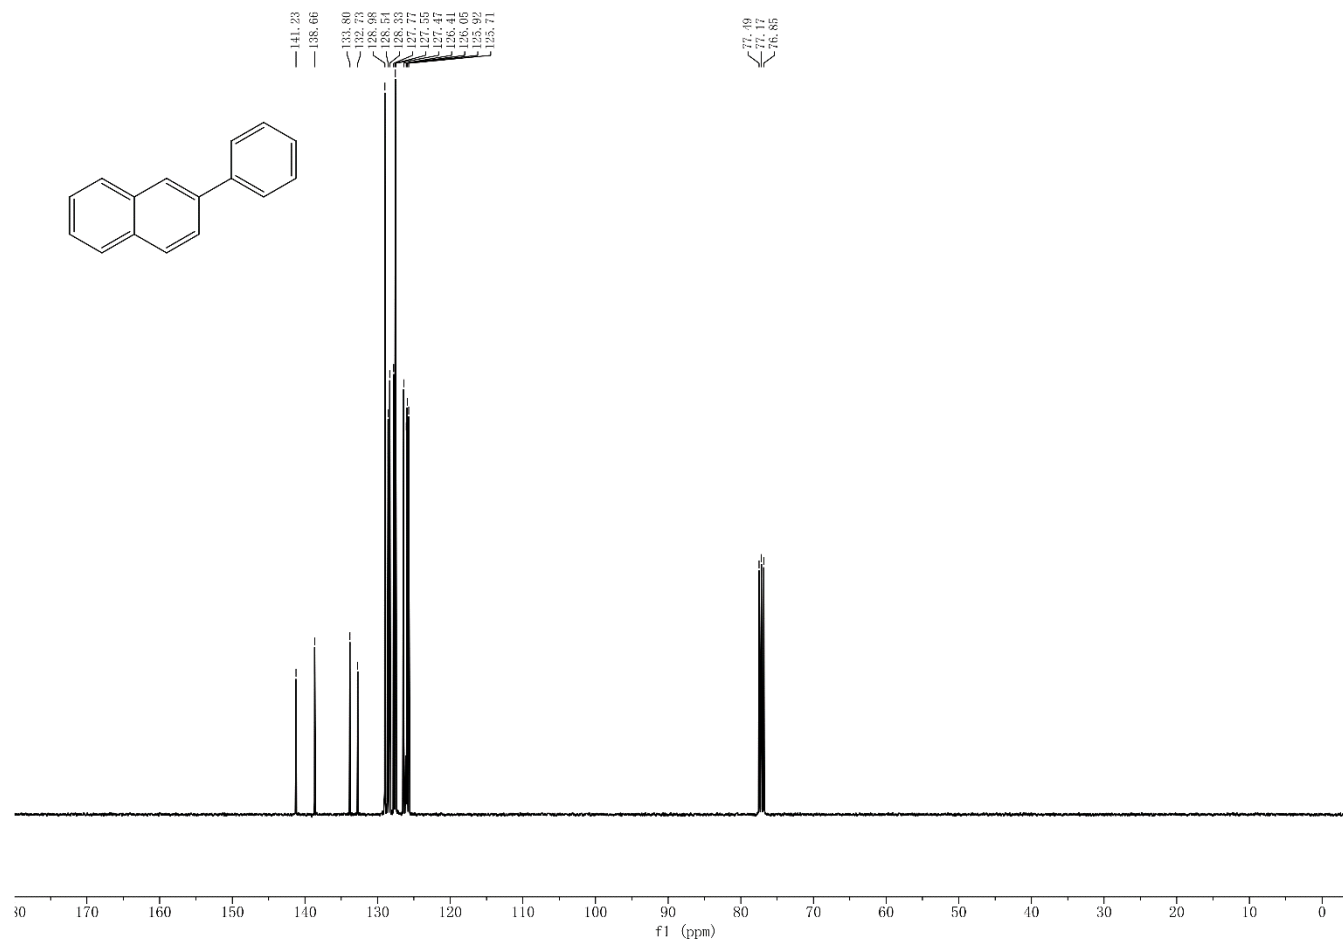

<sup>1</sup>H NMR (400 MHz, CDCl<sub>3</sub>) spectrum of 8m

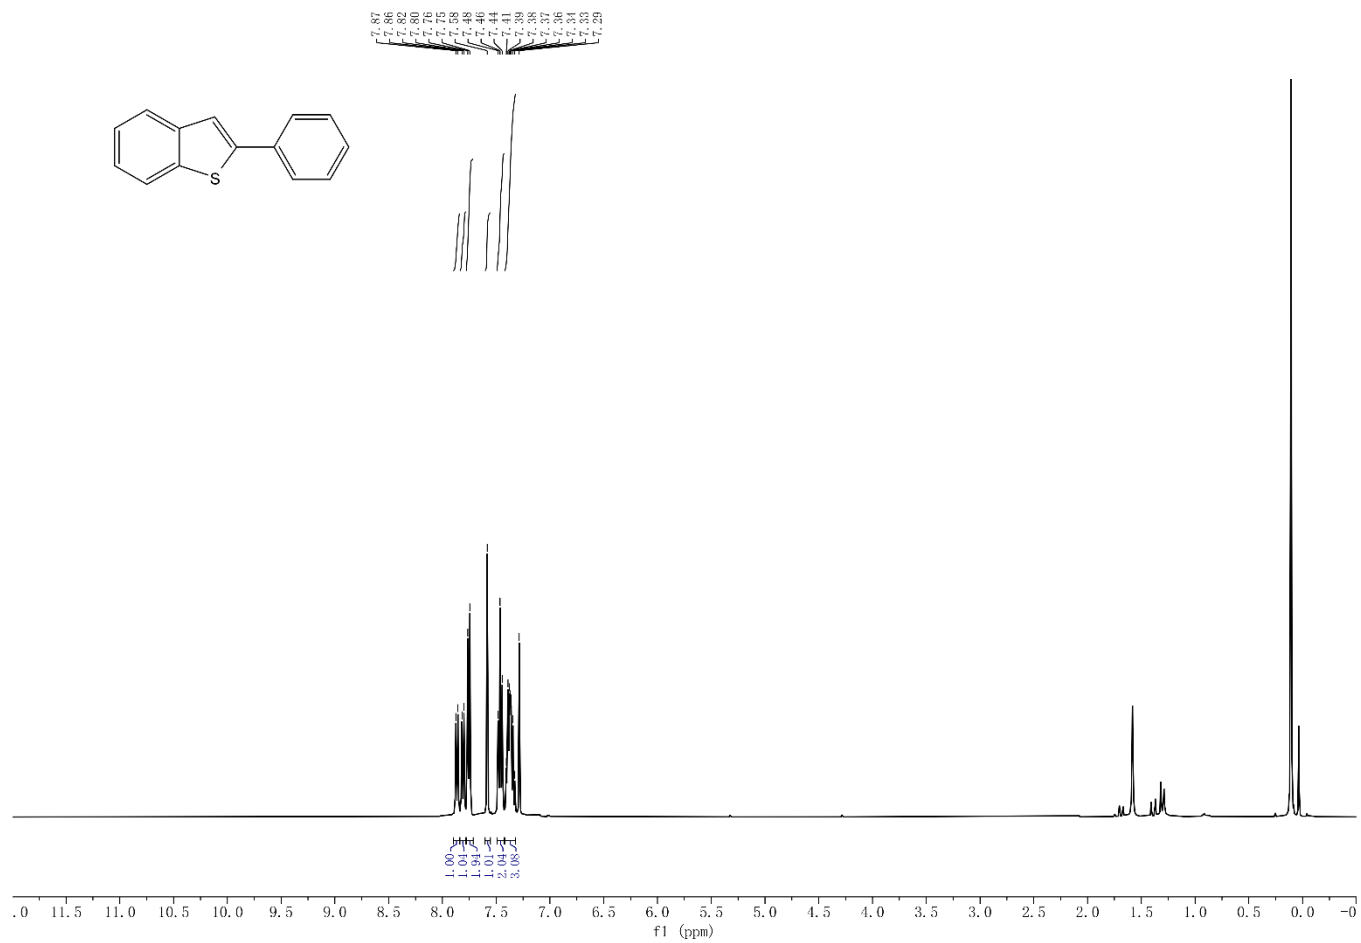

$^{13}\text{C}\{^1\text{H}\}$  NMR (101 MHz,  $\text{CDCl}_3$ ) spectrum of 8m

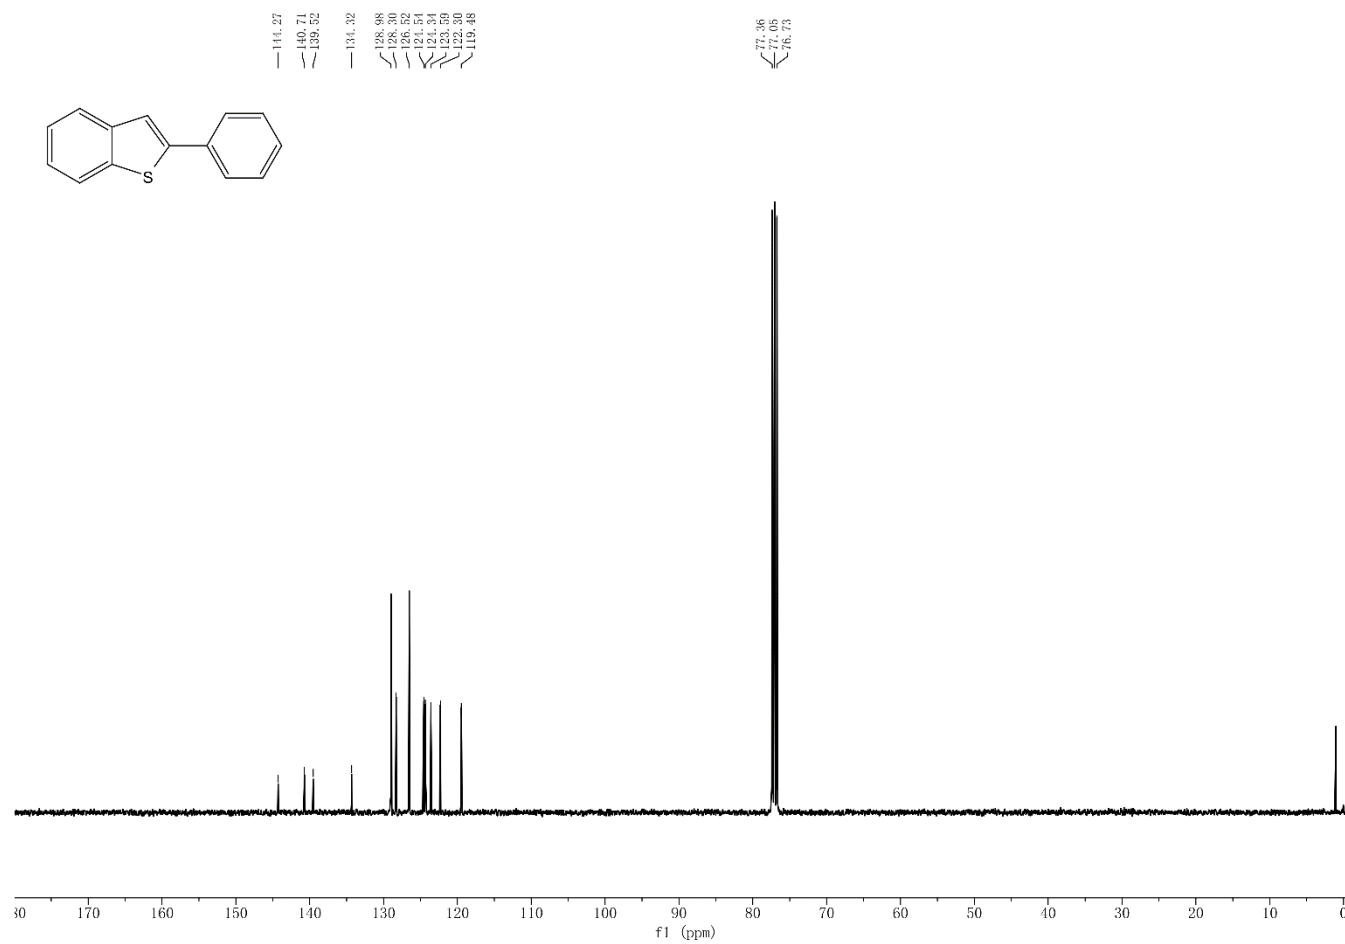

<sup>1</sup>H NMR (400 MHz, CDCl<sub>3</sub>) spectrum of 8n

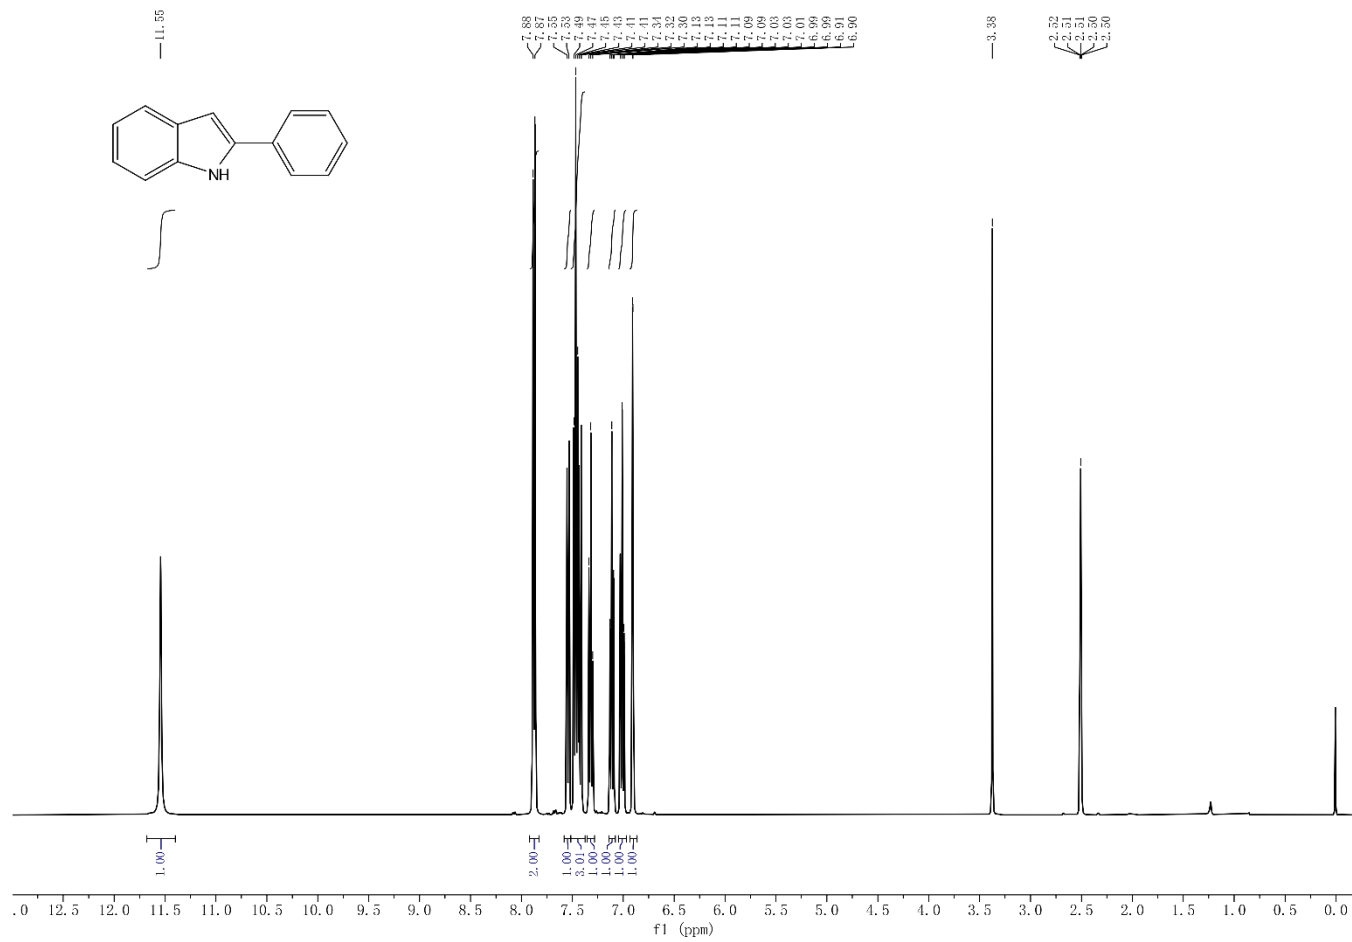

$^{13}\text{C}\{^1\text{H}\}$  NMR (101 MHz,  $\text{CDCl}_3$ ) spectrum of 8n

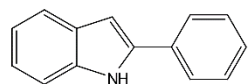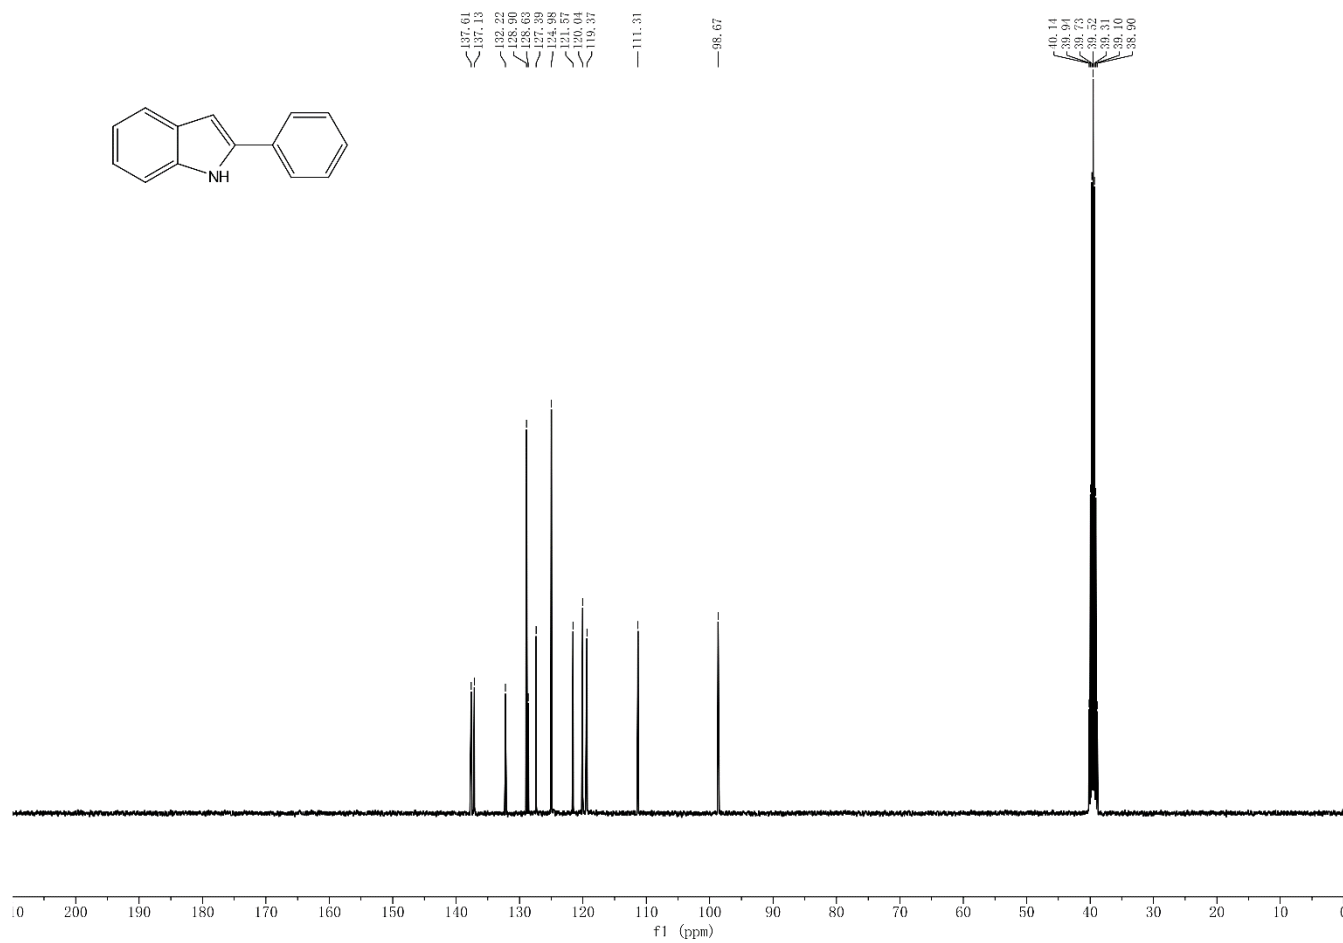

<sup>1</sup>H NMR (400 MHz, CDCl<sub>3</sub>) spectrum of 8o

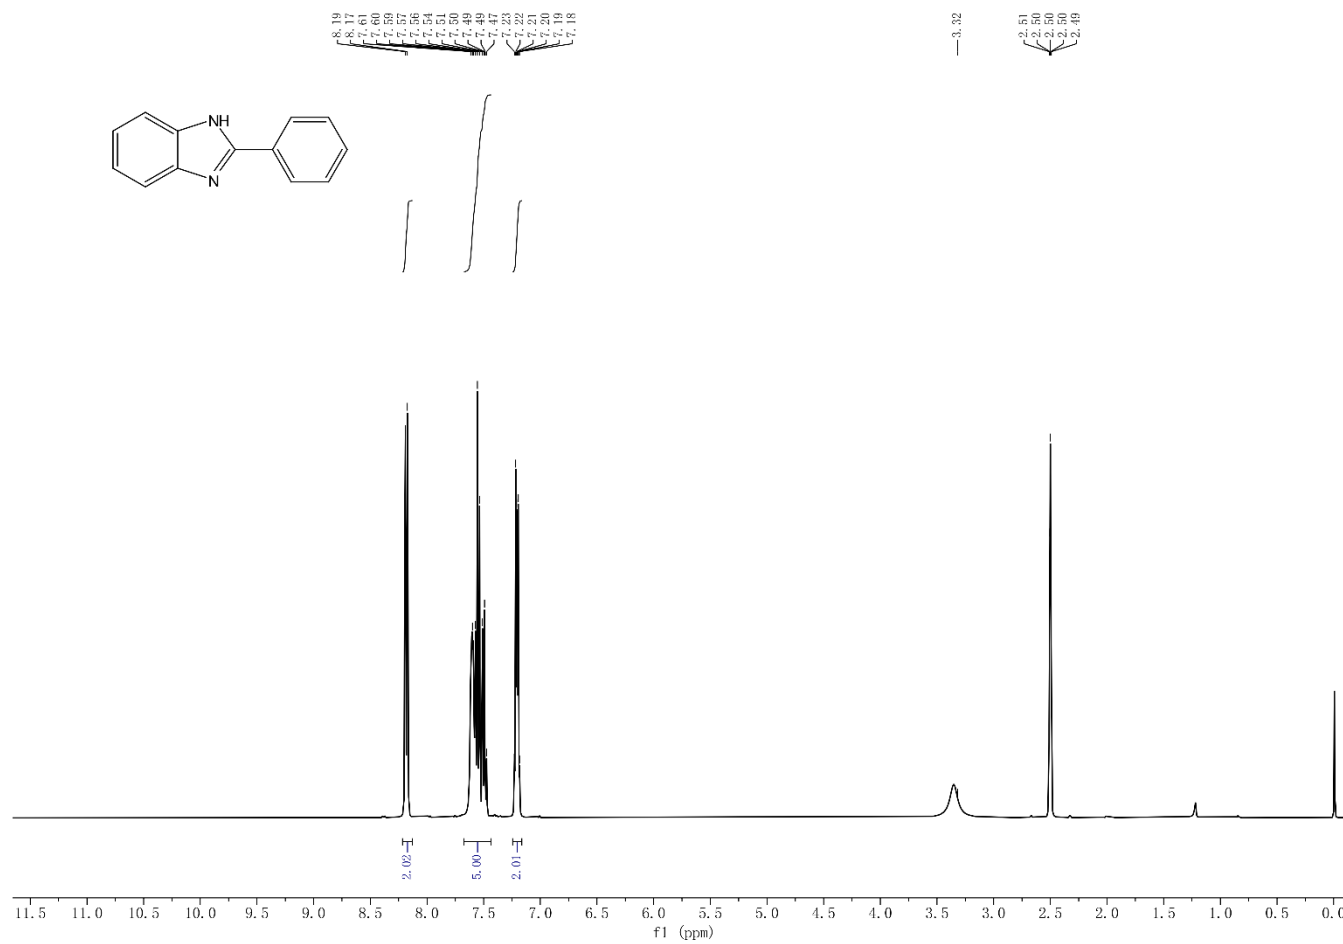

$^{13}\text{C}\{^1\text{H}\}$  NMR (101 MHz,  $\text{CDCl}_3$ ) spectrum of 8o

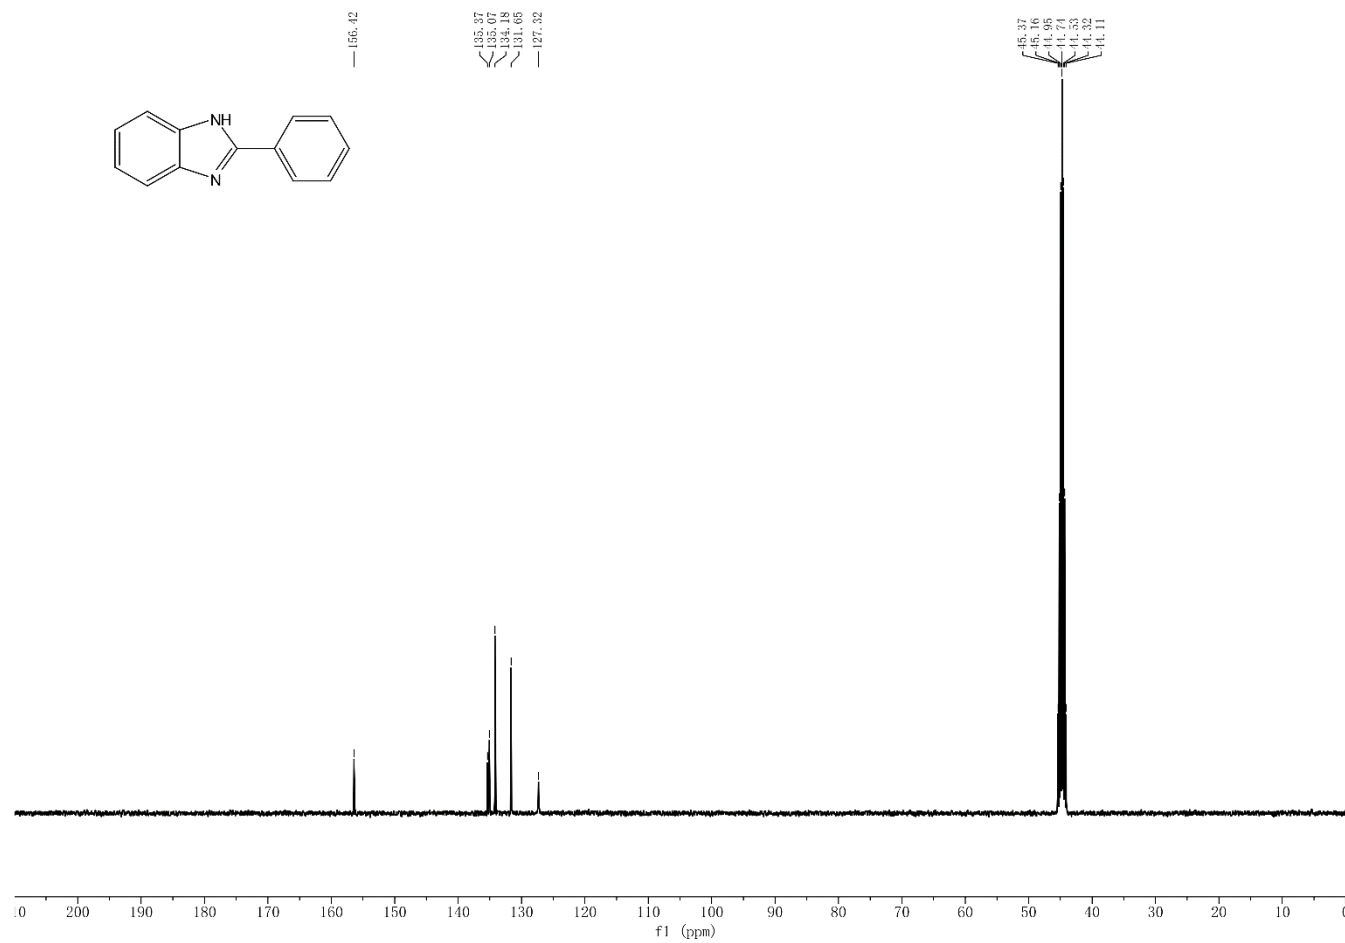



<sup>1</sup>H NMR (400 MHz, CDCl<sub>3</sub>) spectrum of 8p

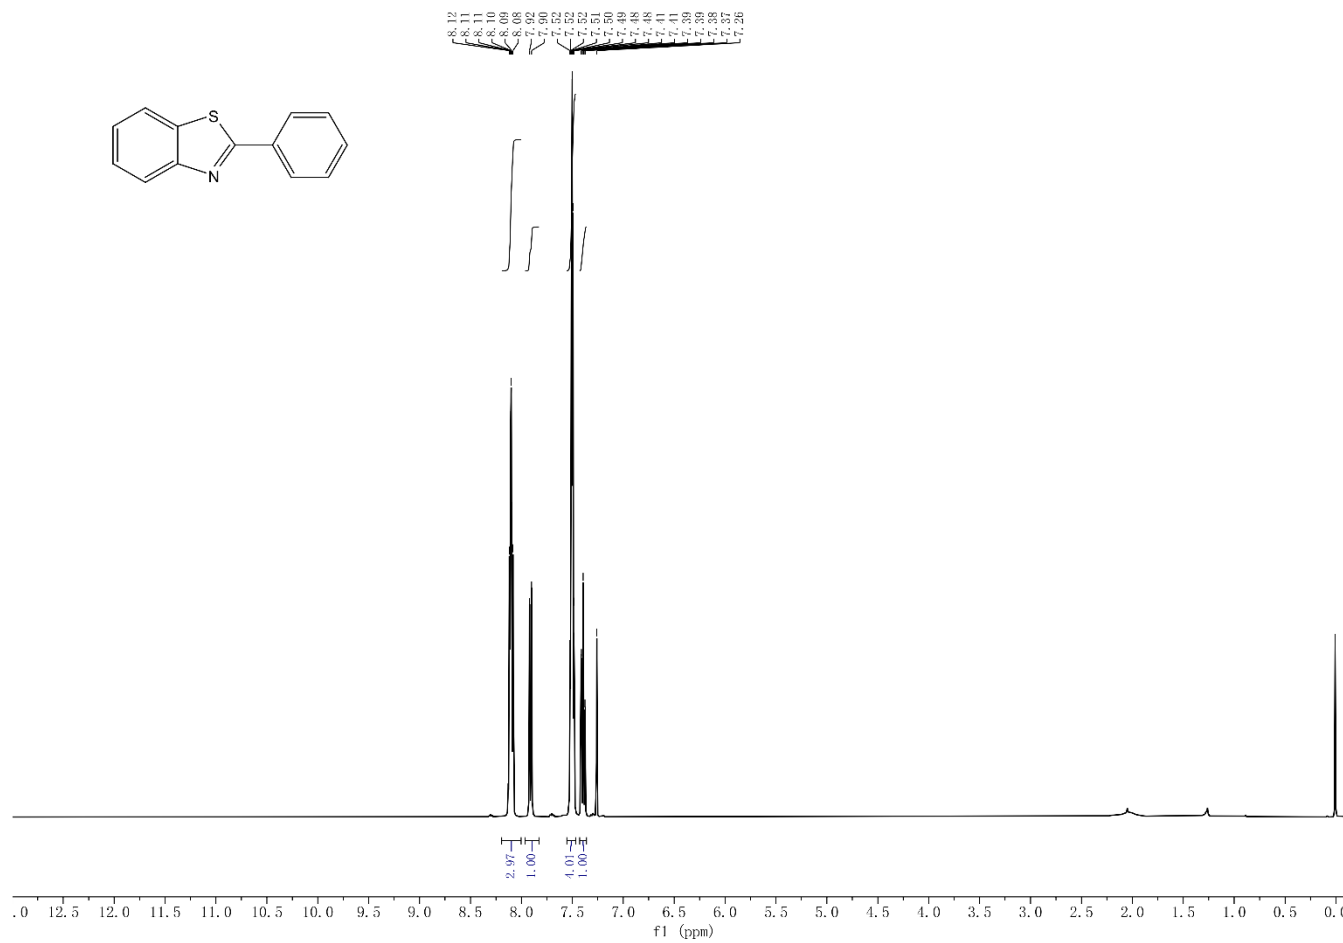

$^{13}\text{C}\{^1\text{H}\}$  NMR (101 MHz,  $\text{CDCl}_3$ ) spectrum of 8o

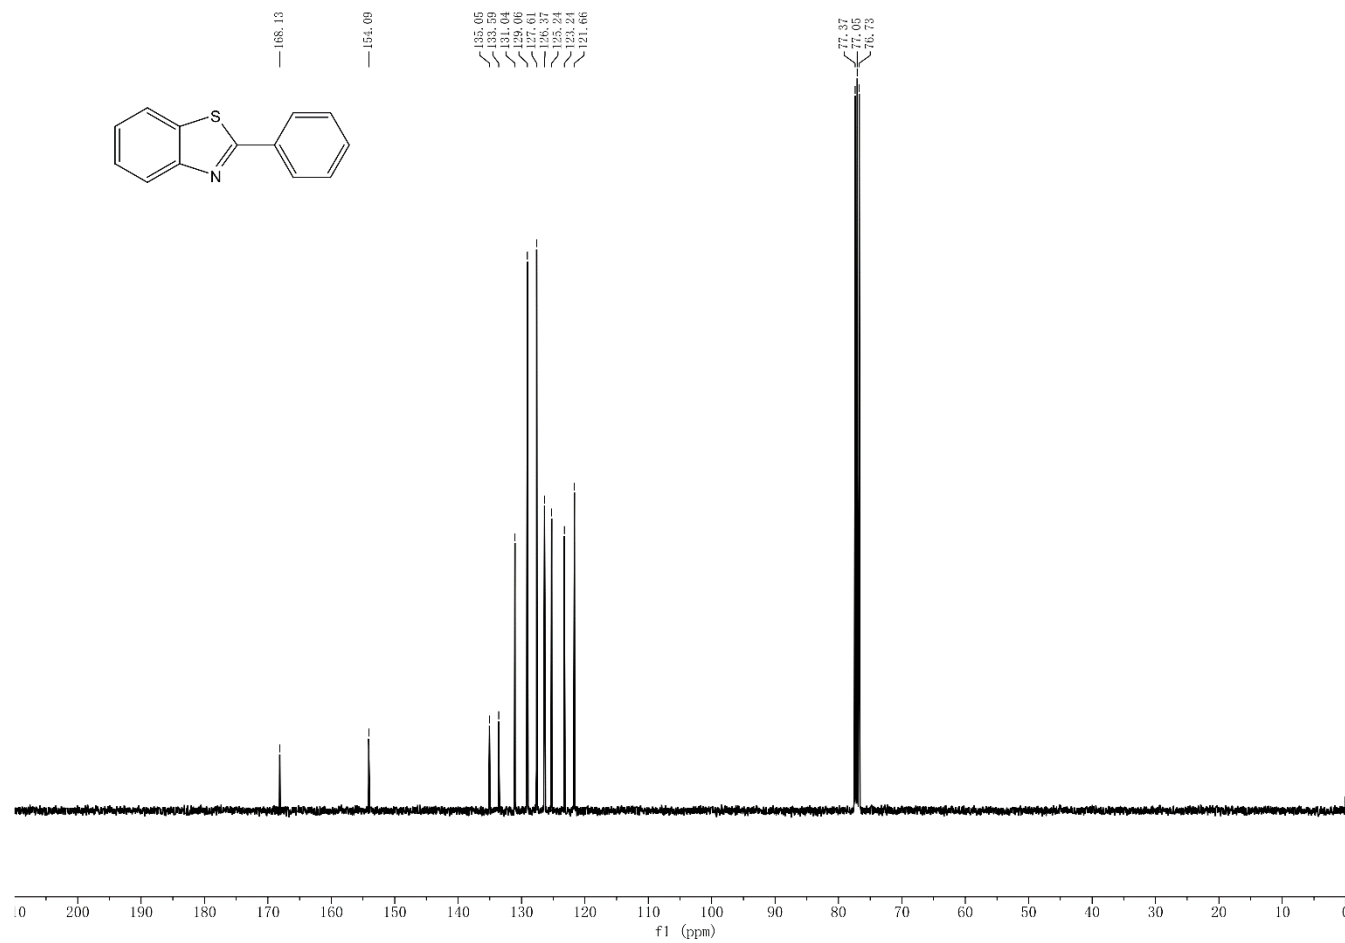

<sup>1</sup>H NMR (400 MHz, CDCl<sub>3</sub>) spectrum of 8q

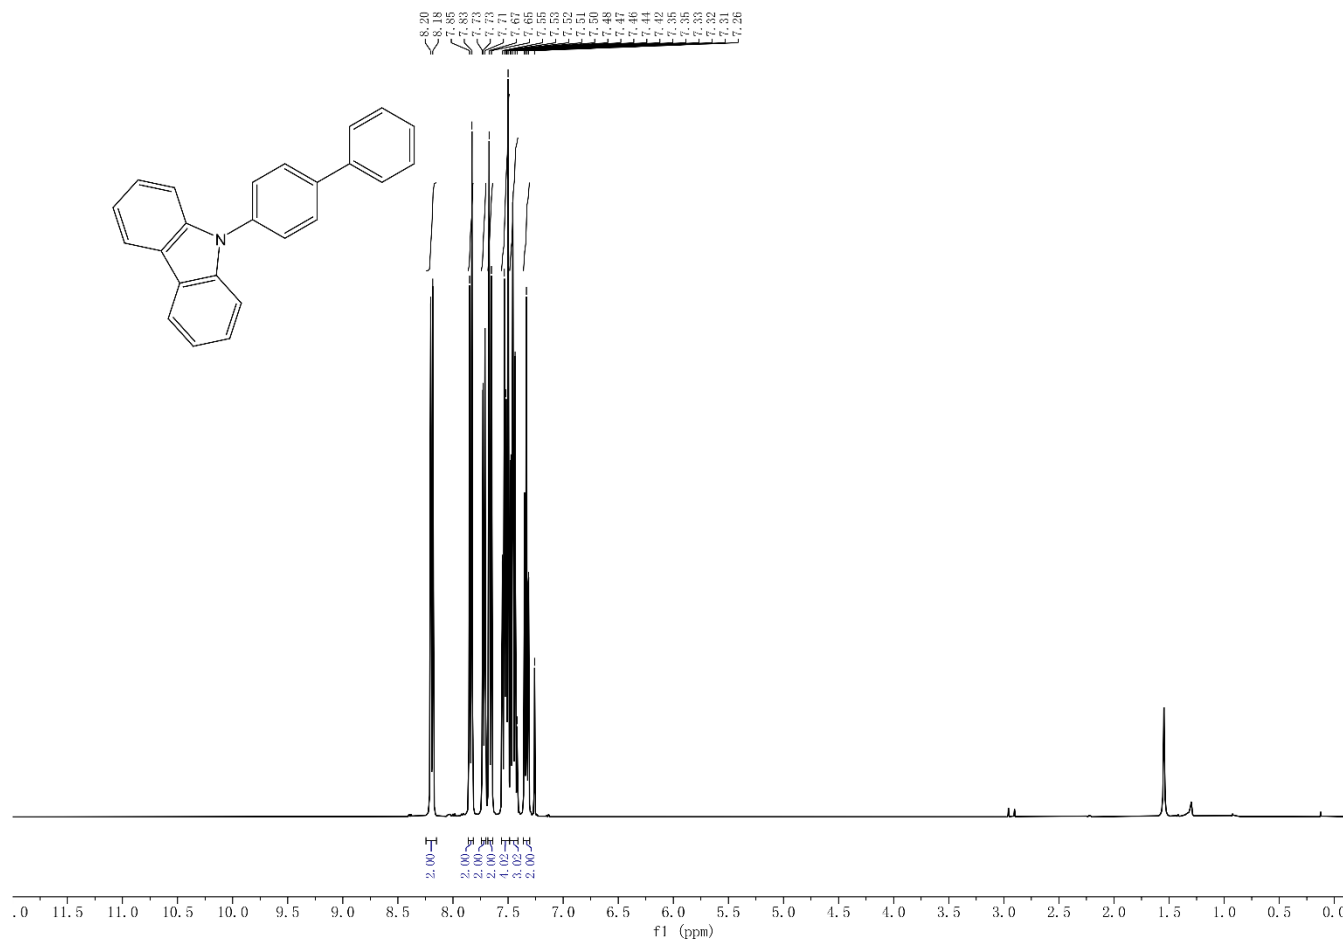

$^{13}\text{C}\{^1\text{H}\}$  NMR (101 MHz,  $\text{CDCl}_3$ ) spectrum of 8q

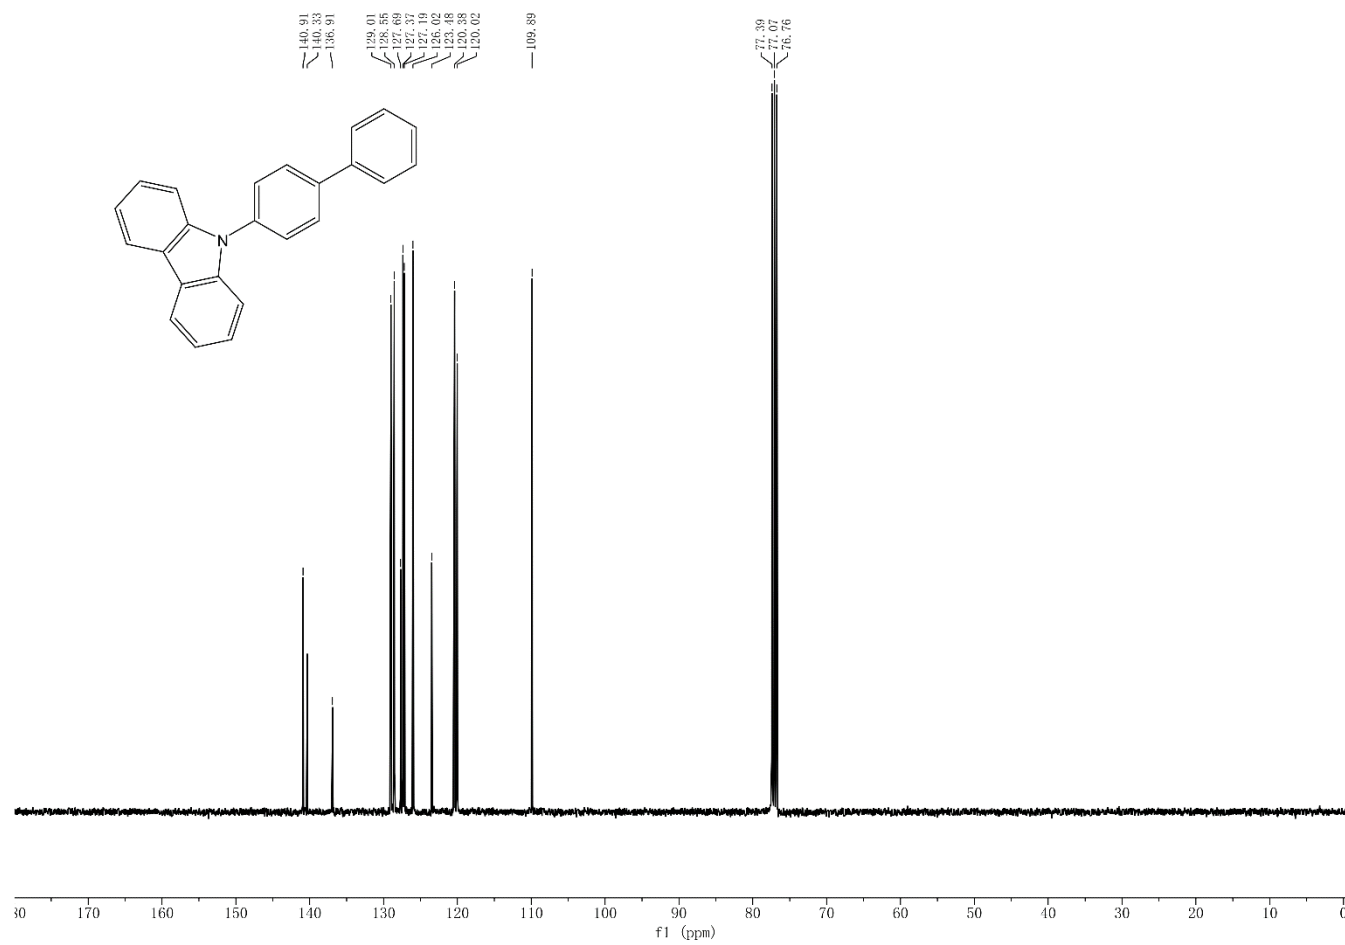

<sup>1</sup>H NMR (400 MHz, CDCl<sub>3</sub>) spectrum of 8r

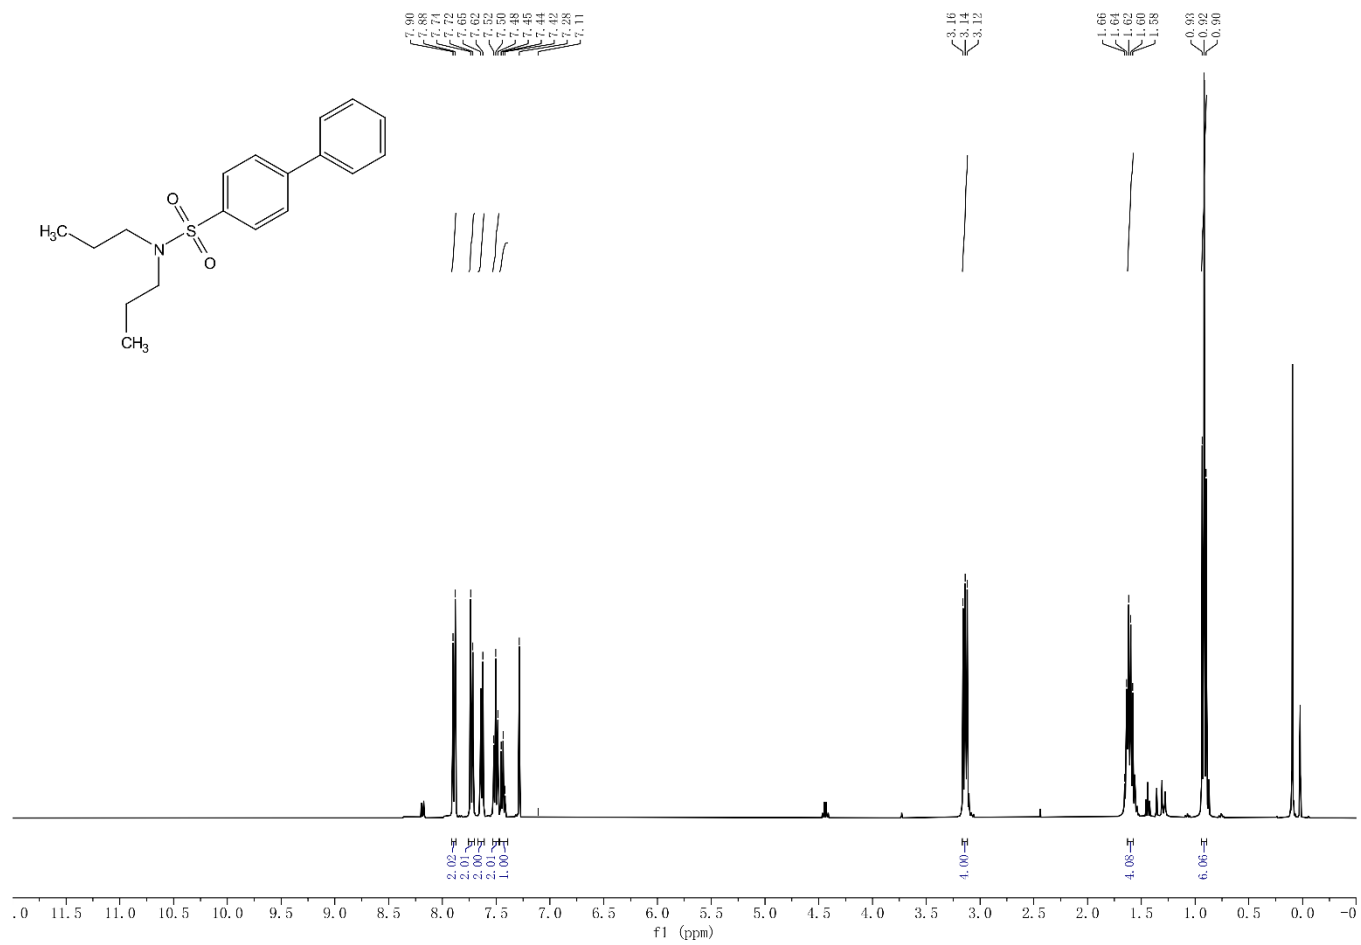

$^{13}\text{C}\{^1\text{H}\}$  NMR (101 MHz,  $\text{CDCl}_3$ ) spectrum of 8r

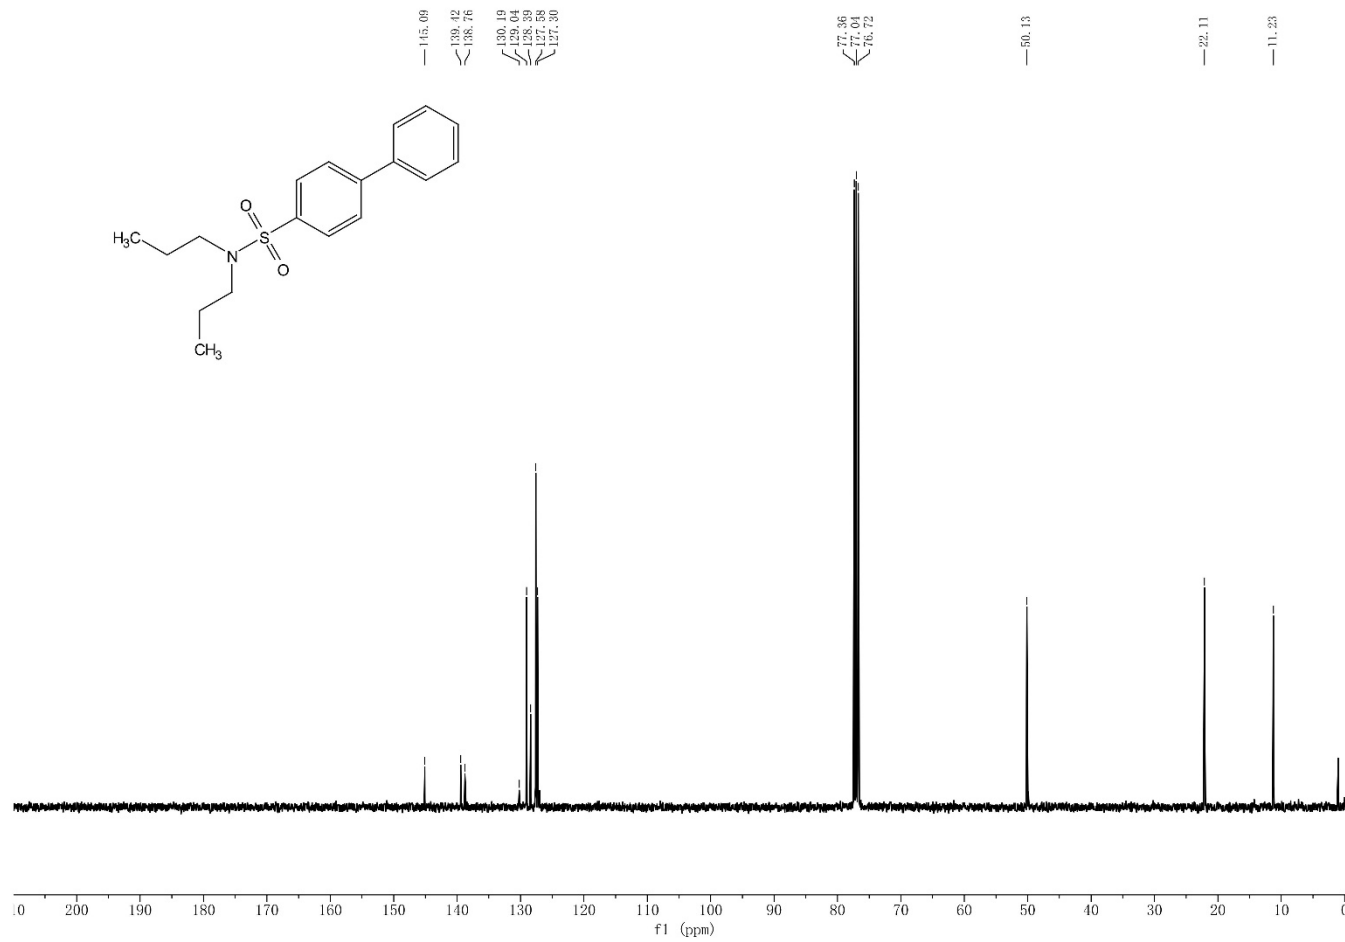

<sup>1</sup>H NMR (400 MHz, CDCl<sub>3</sub>) spectrum of 8s

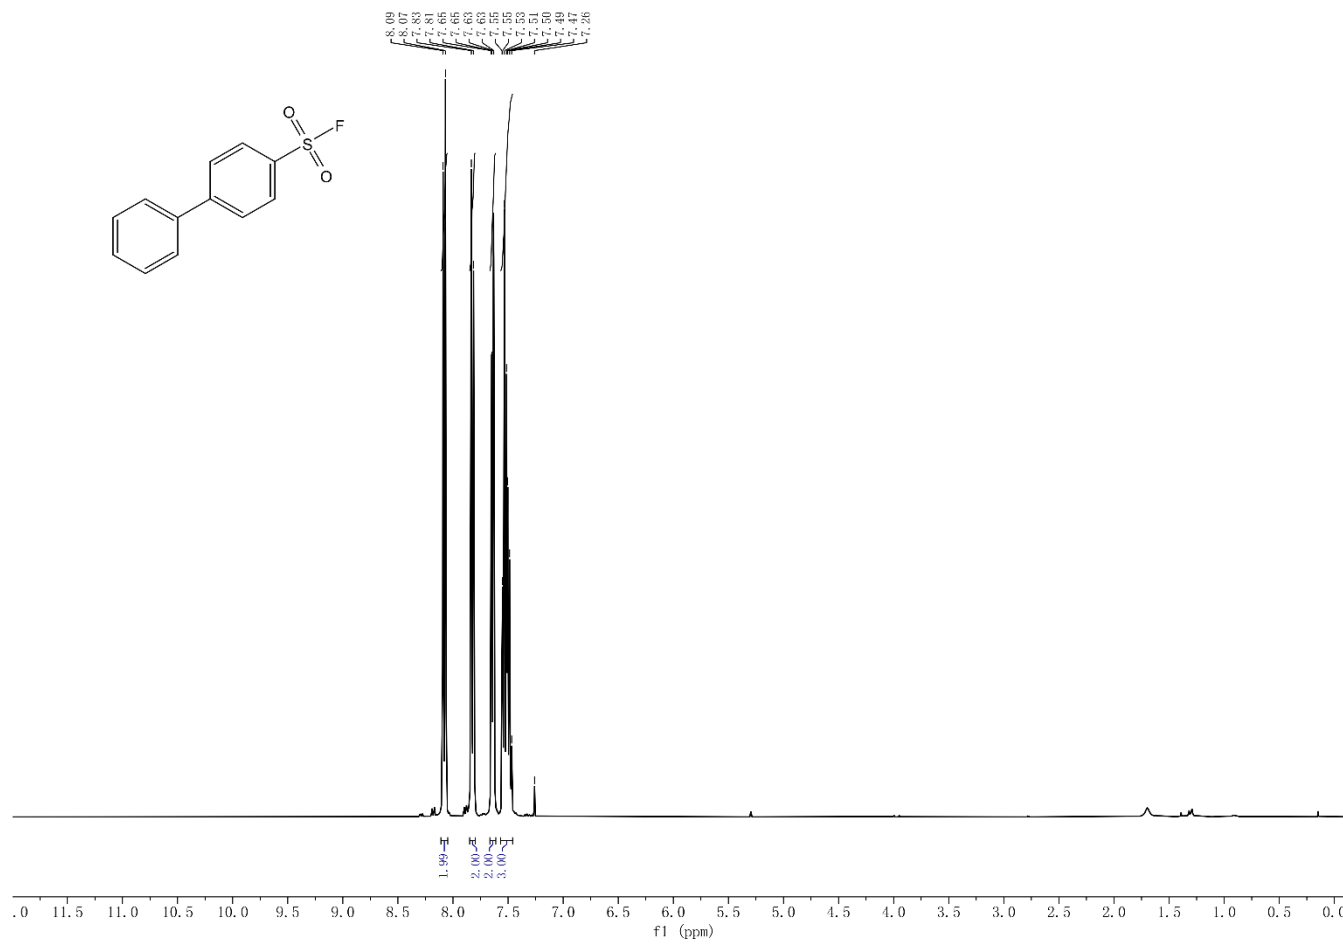

$^{13}\text{C}\{^1\text{H}\}$  NMR (101 MHz,  $\text{CDCl}_3$ ) spectrum of 8s

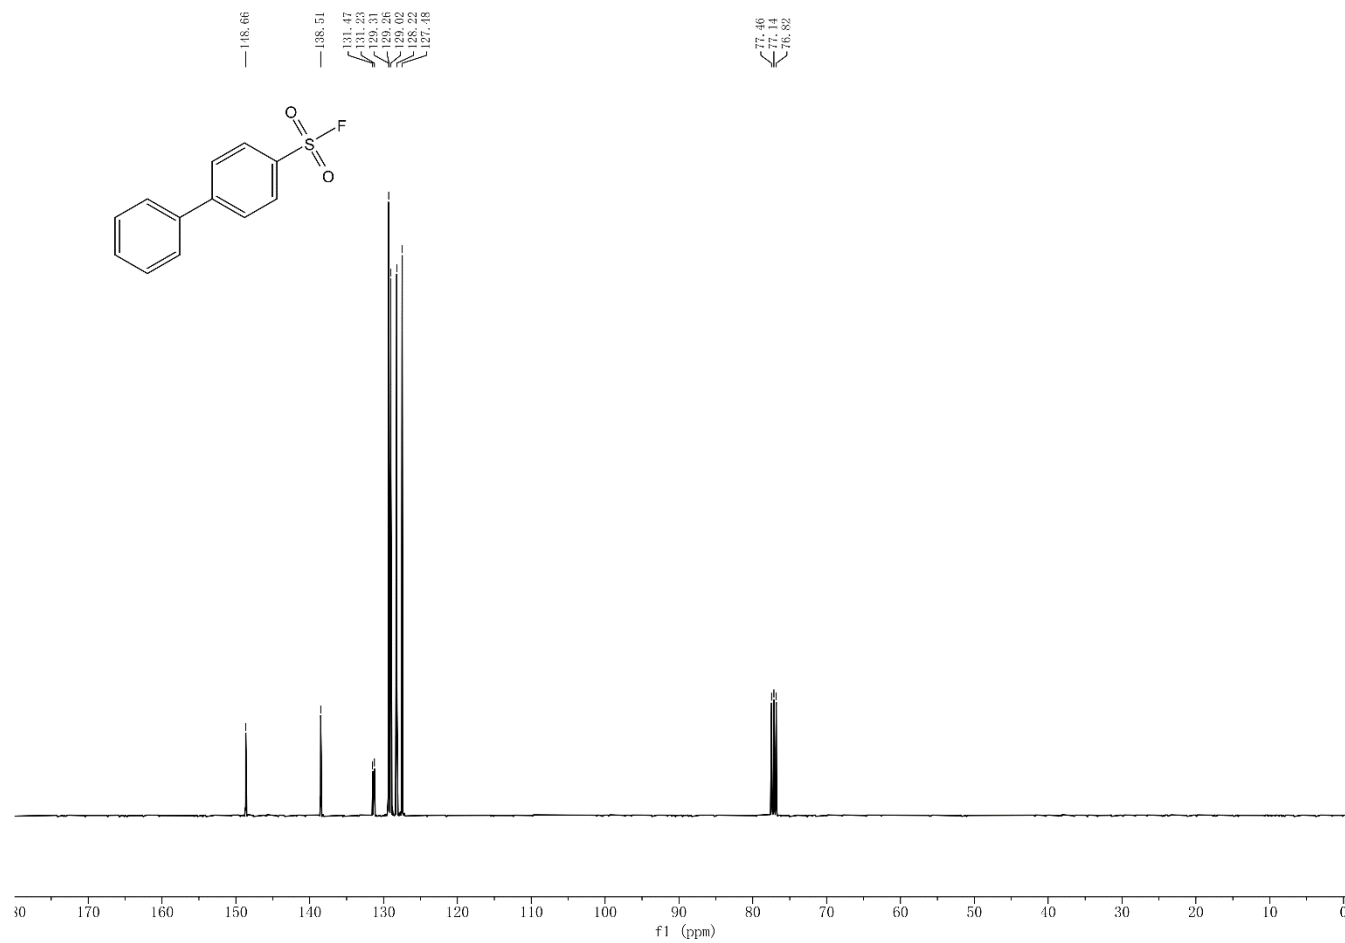



<sup>19</sup>F NMR (377 MHz, CDCl<sub>3</sub>) spectrum of 8s

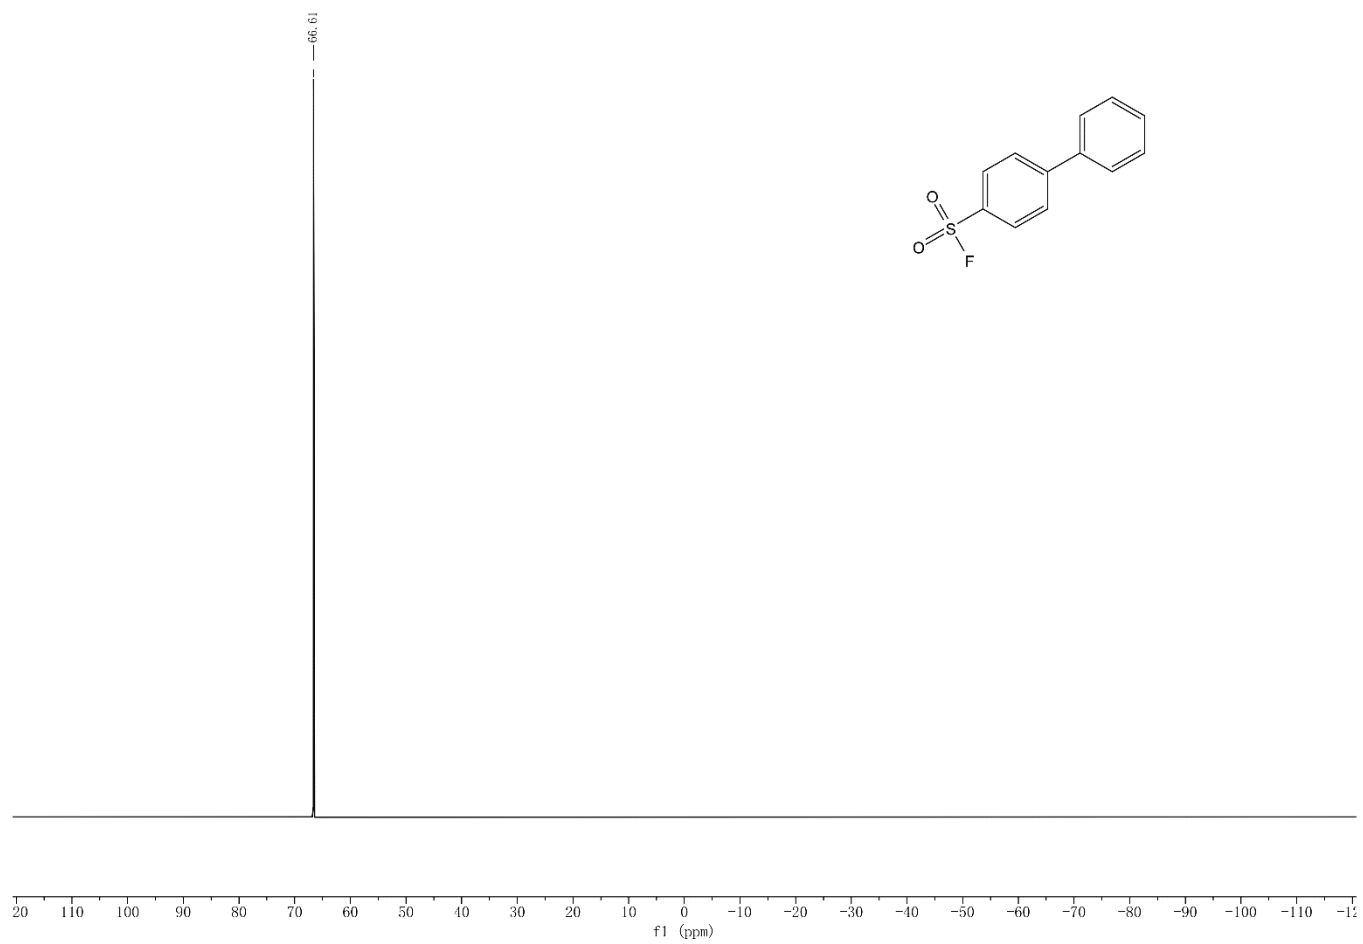

$^1\text{H}$  NMR (400 MHz,  $\text{CDCl}_3$ ) spectrum of 8t

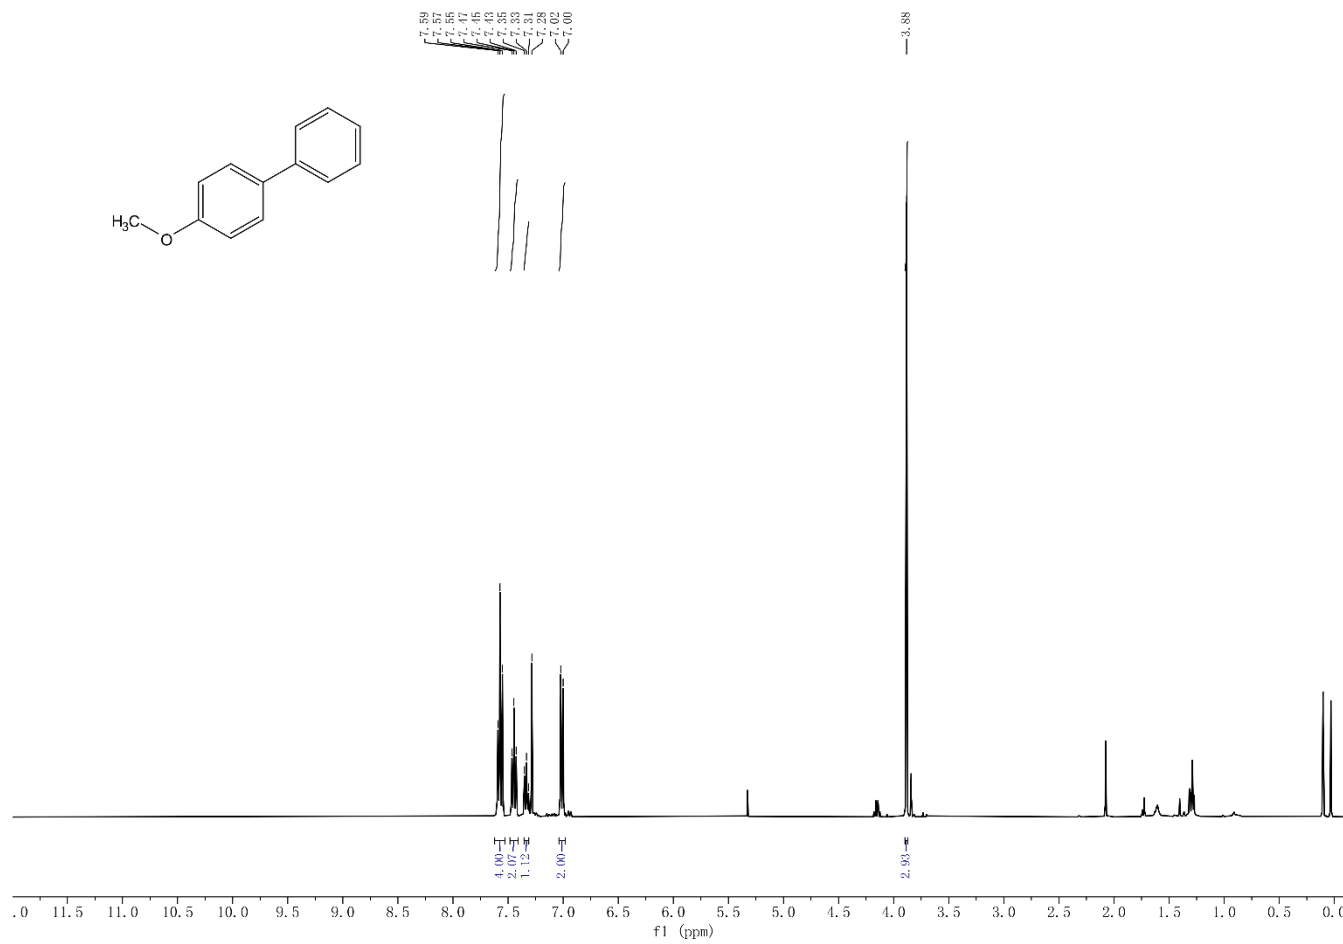

$^{13}\text{C}\{^1\text{H}\}$  NMR (101 MHz,  $\text{CDCl}_3$ ) spectrum of 8t

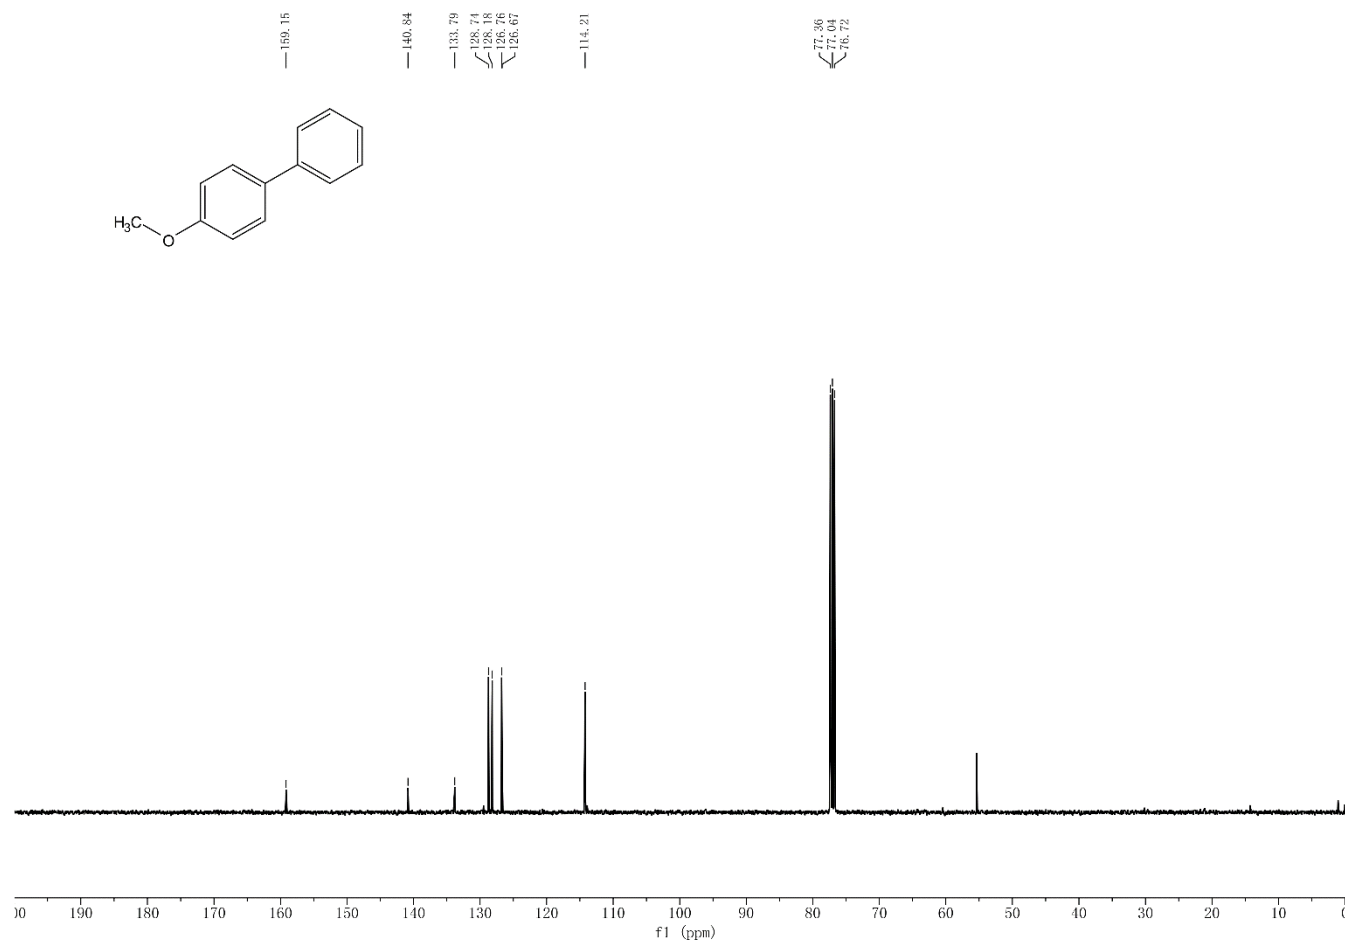

<sup>1</sup>H NMR (400 MHz, CDCl<sub>3</sub>) spectrum of 8u

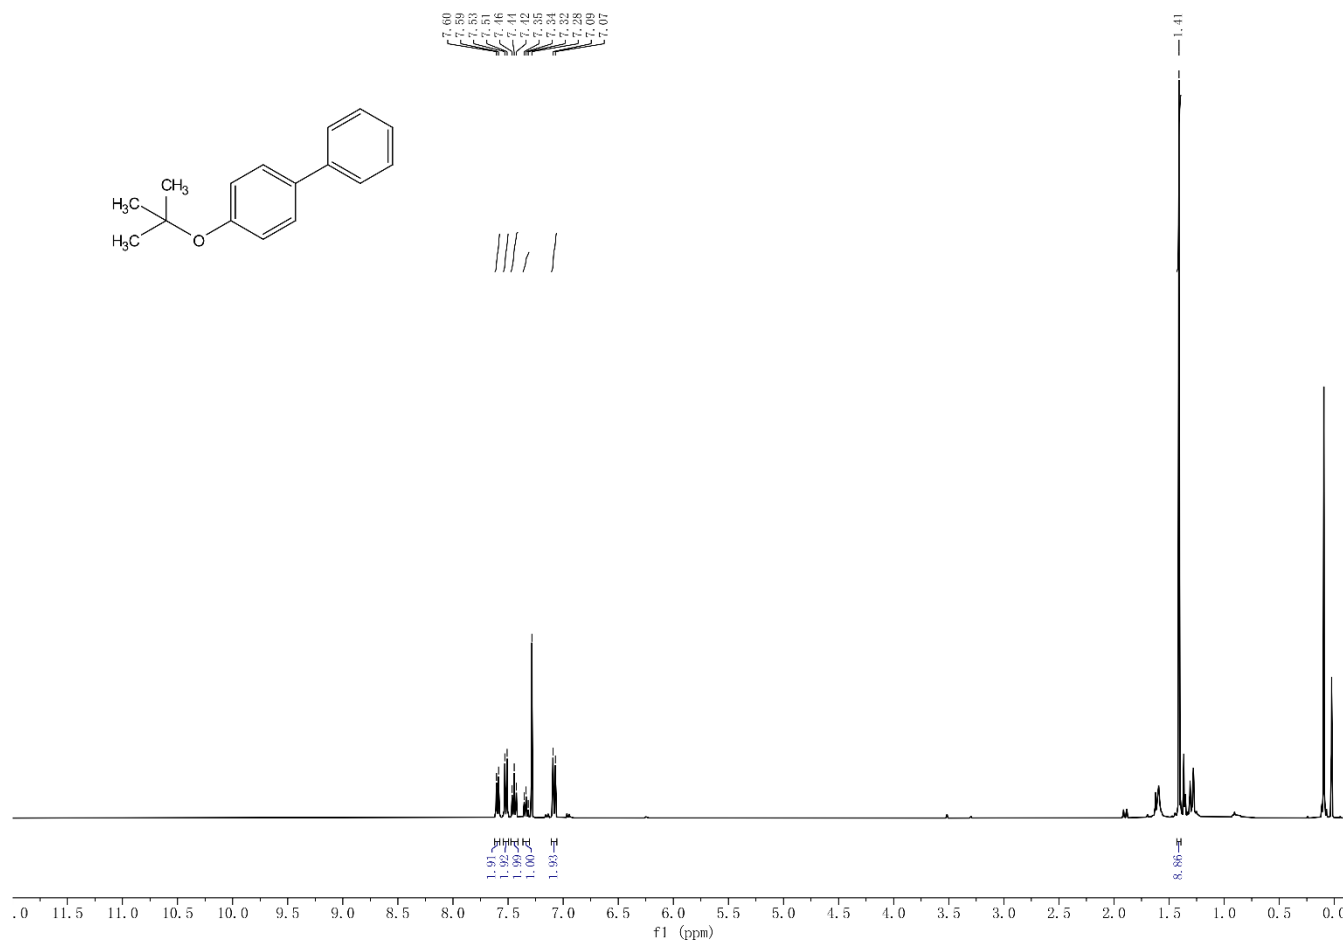

$^{13}\text{C}\{^1\text{H}\}$  NMR (101 MHz,  $\text{CDCl}_3$ ) spectrum of 8u

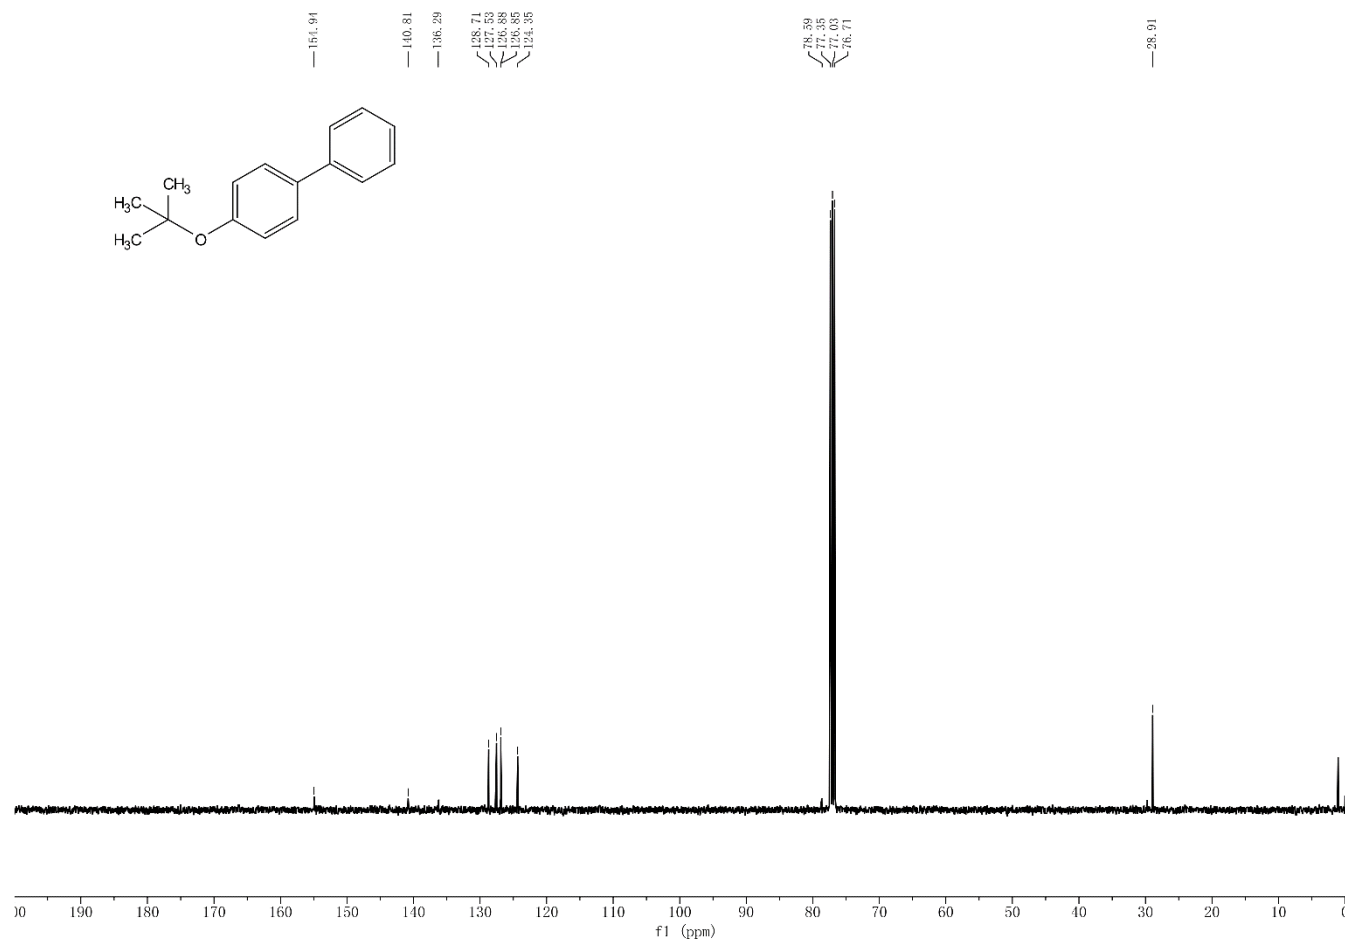

<sup>1</sup>H NMR (400 MHz, CDCl<sub>3</sub>) spectrum of 8v

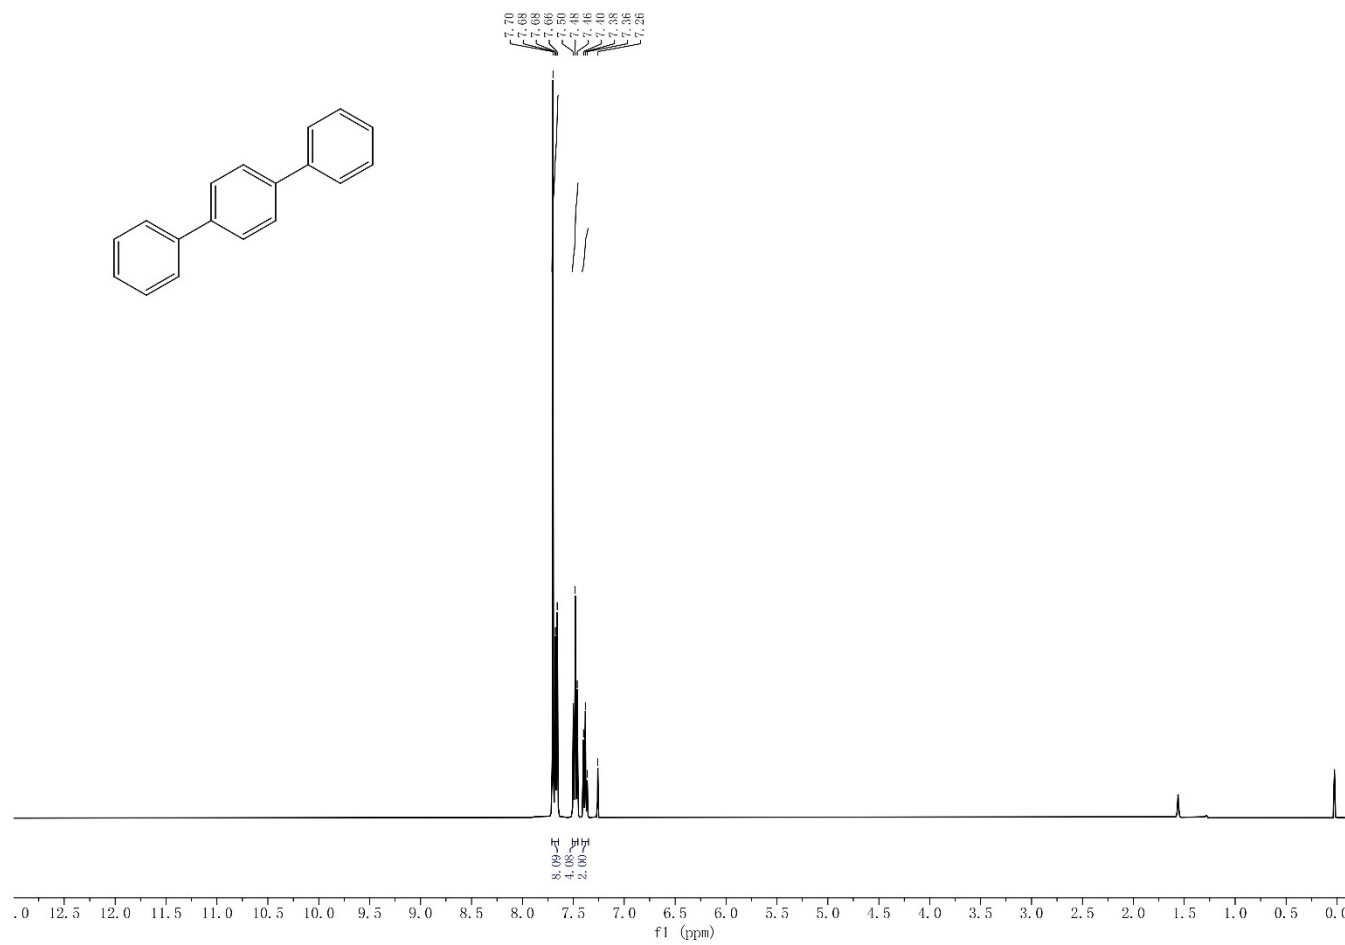

$^{13}\text{C}\{^1\text{H}\}$  NMR (101 MHz,  $\text{CDCl}_3$ ) spectrum of 8v

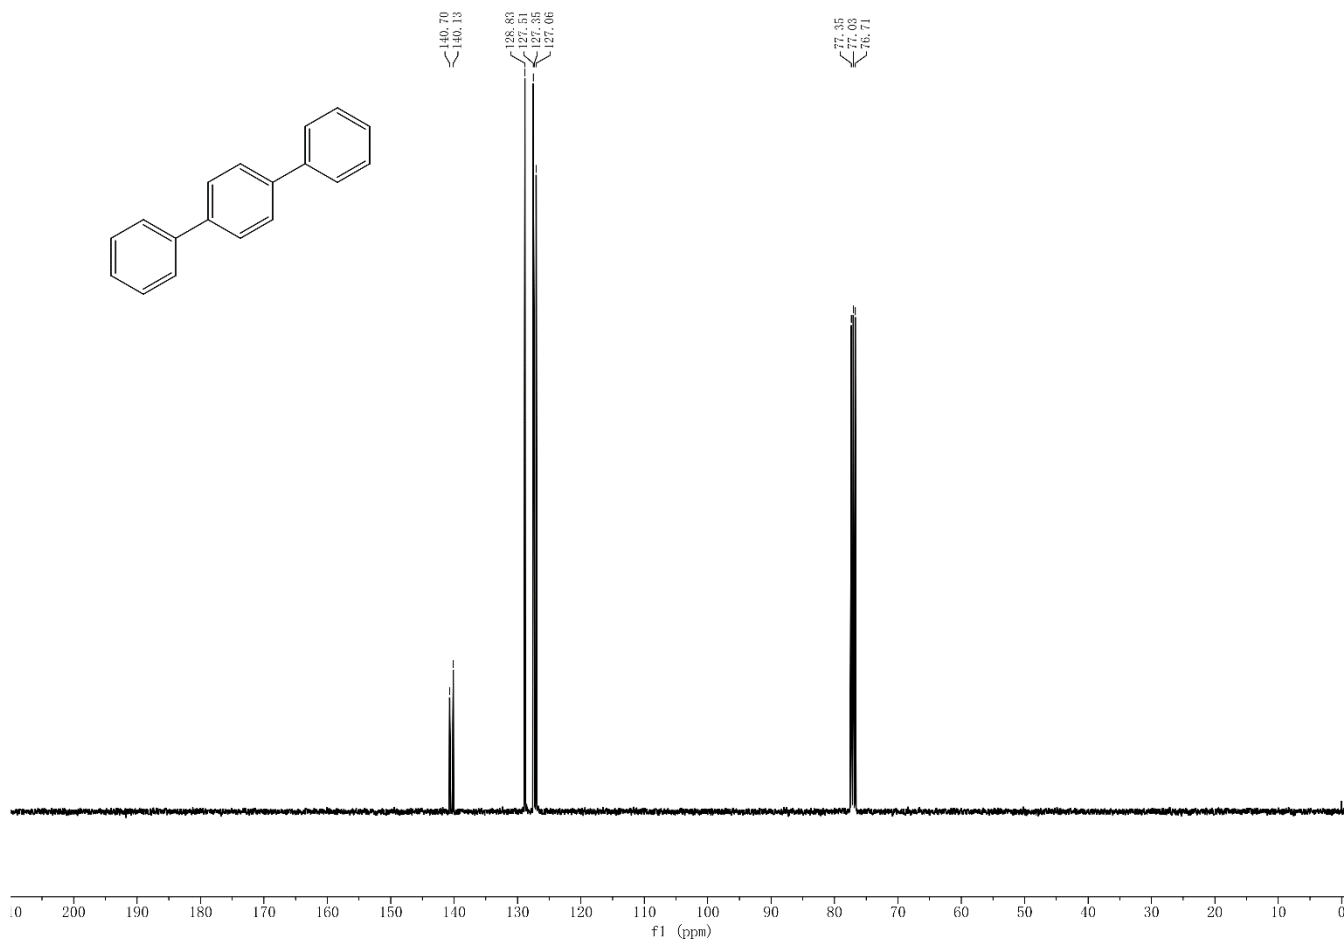

<sup>1</sup>H NMR (400 MHz, CDCl<sub>3</sub>) spectrum of 8w

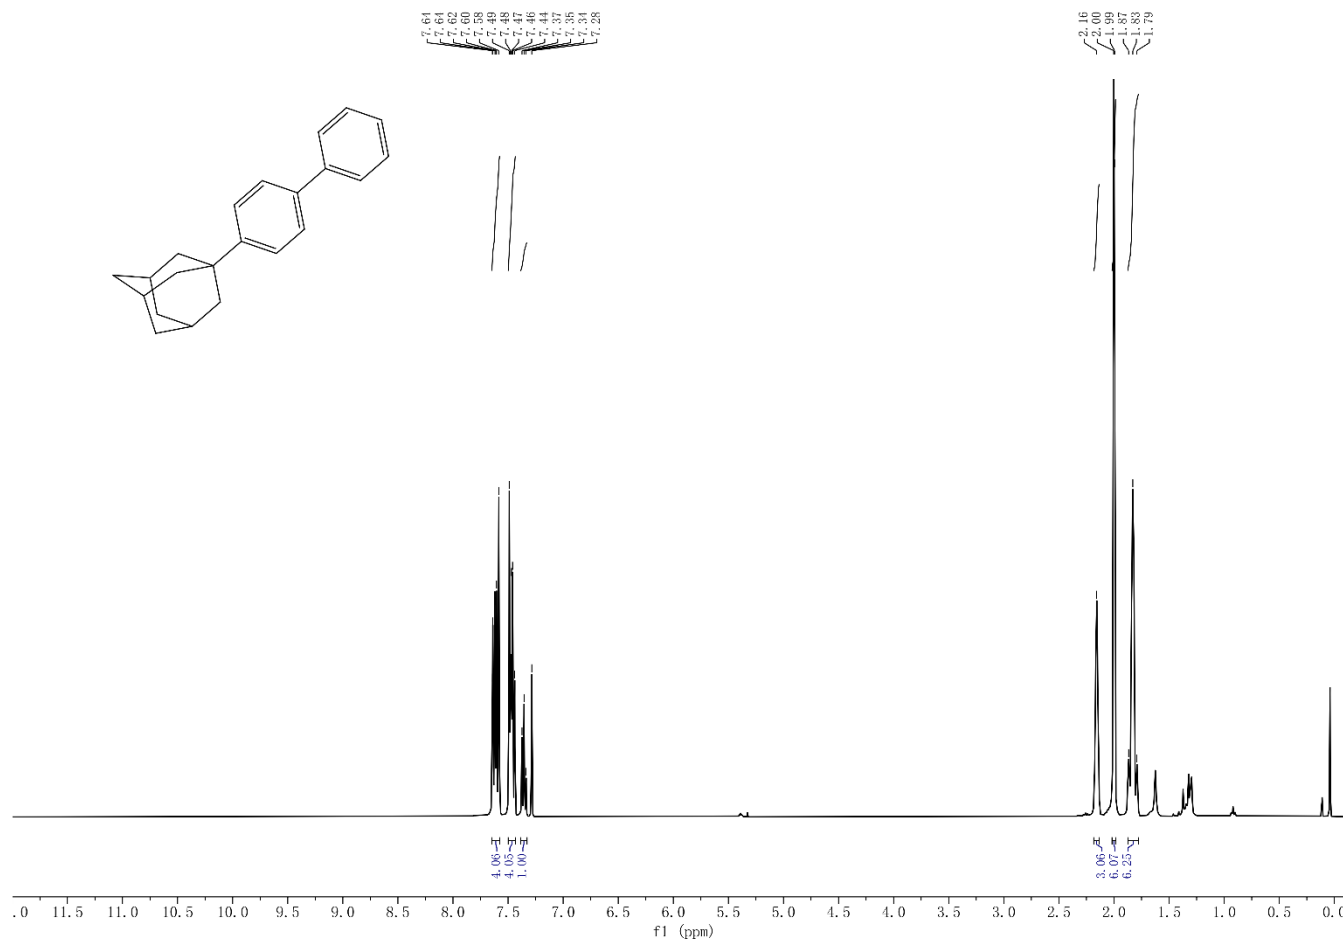



$^{13}\text{C}\{^1\text{H}\}$  NMR (101 MHz,  $\text{CDCl}_3$ ) spectrum of 8v

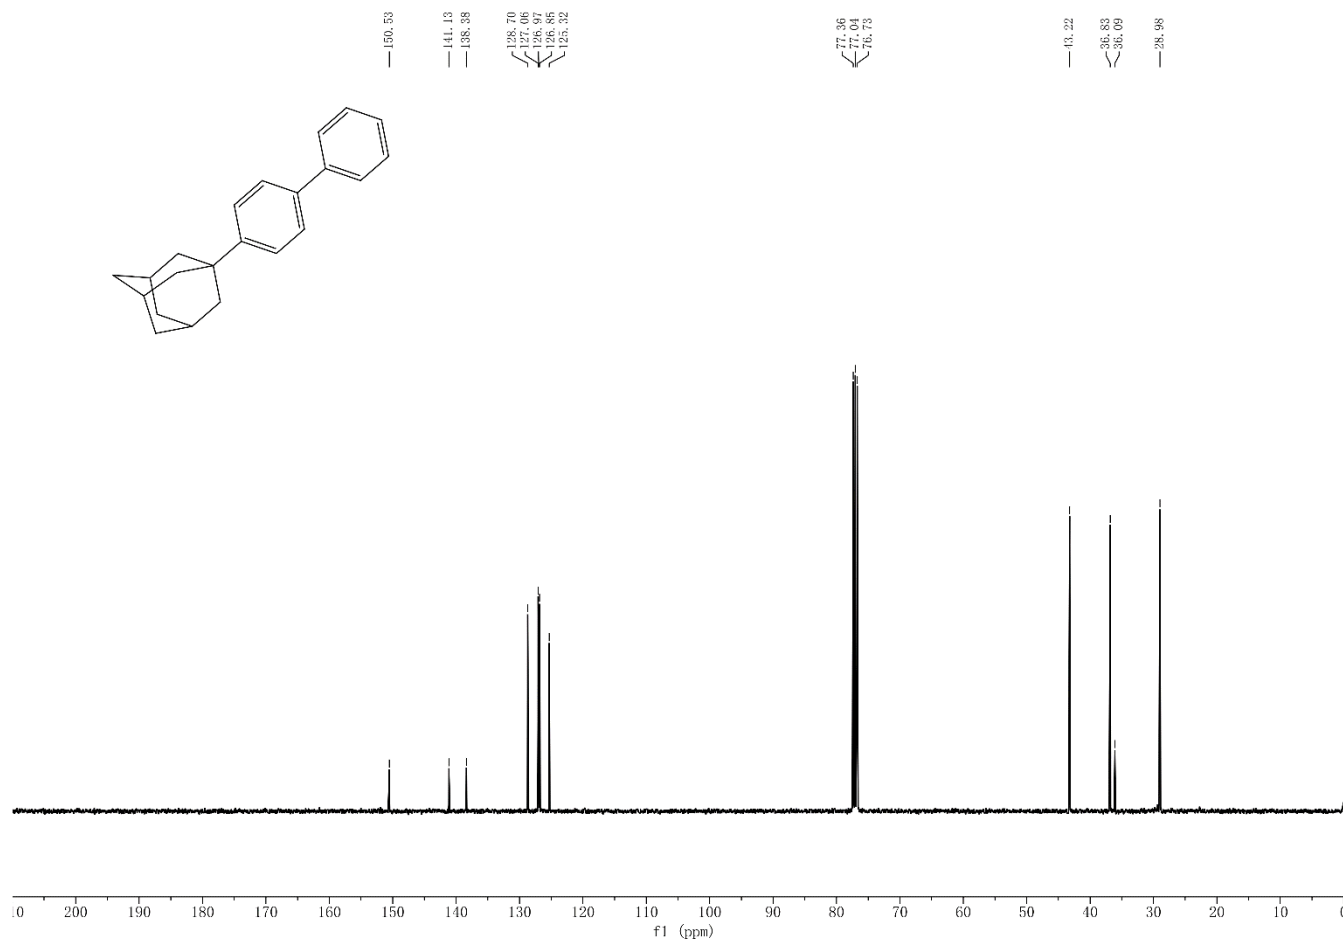

<sup>1</sup>H NMR (400 MHz, CDCl<sub>3</sub>) spectrum of 9a

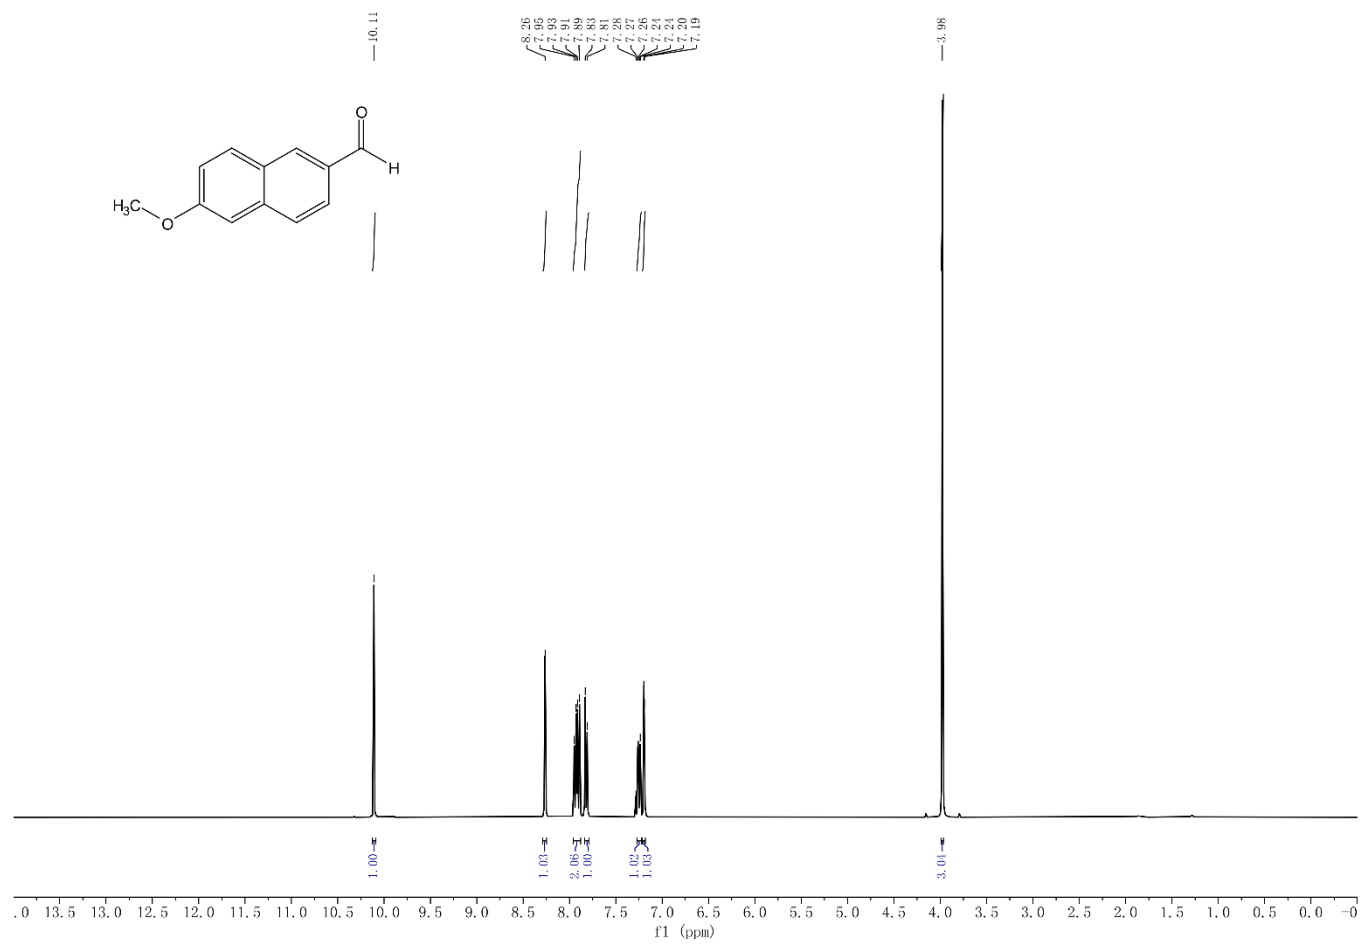

$^{13}\text{C}\{^1\text{H}\}$  NMR (101 MHz,  $\text{CDCl}_3$ ) spectrum of 9a

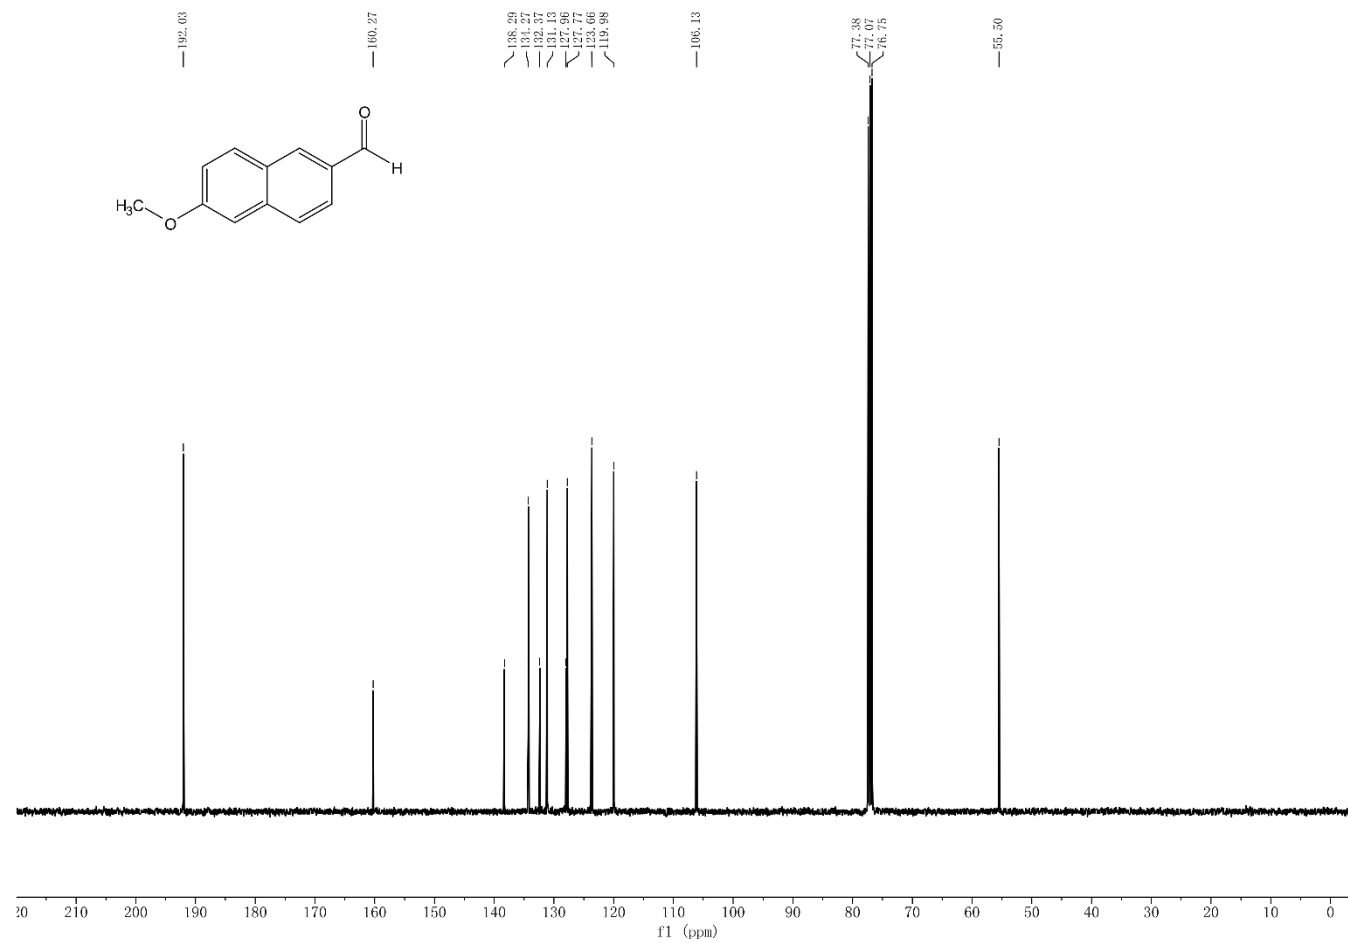

<sup>1</sup>H NMR (400 MHz, DMSO-*d*<sup>6</sup>) spectrum of 9b

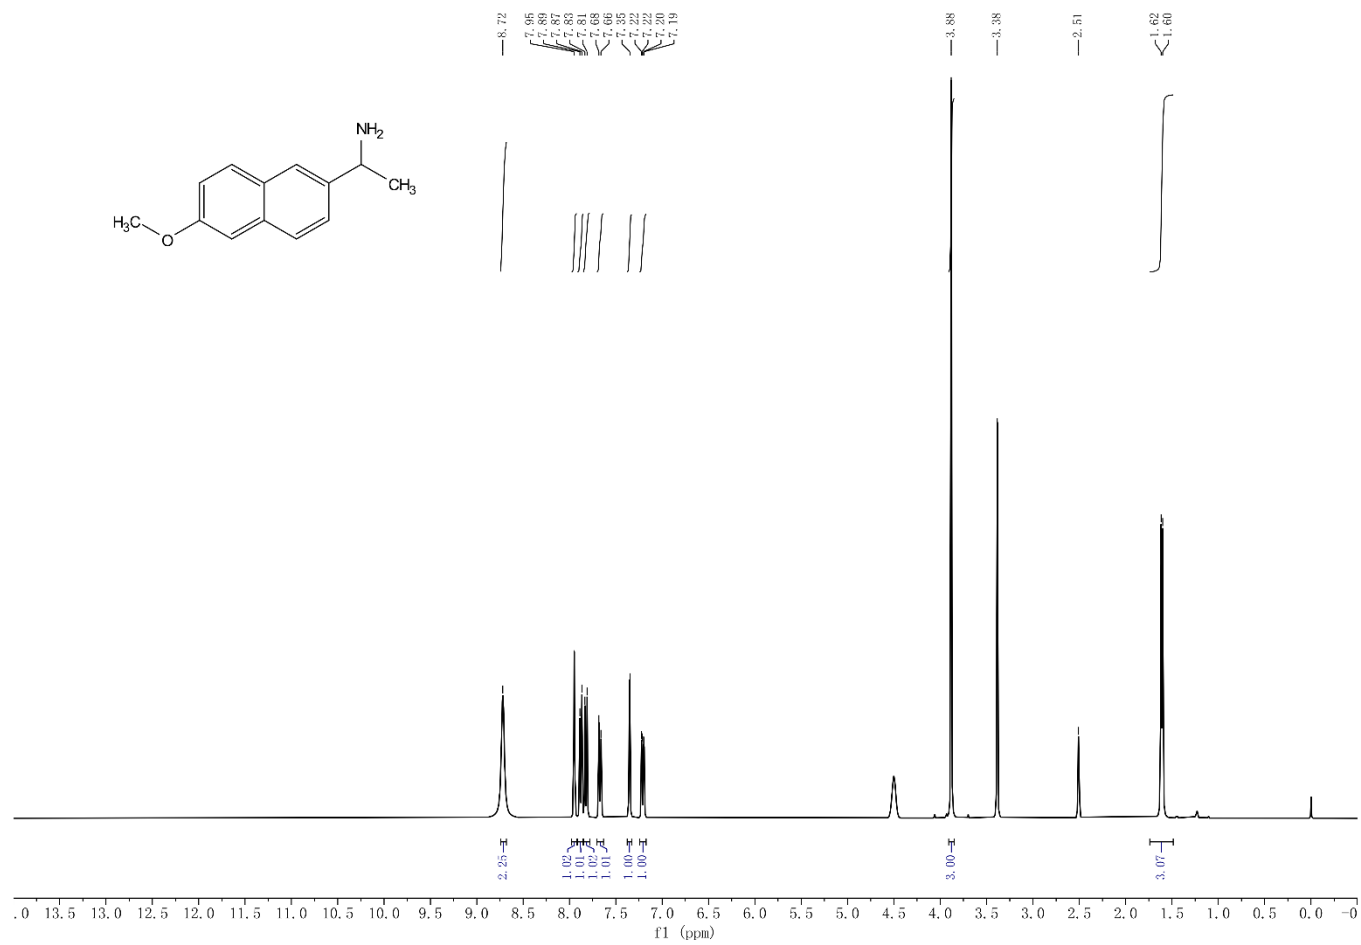

$^{13}\text{C}\{^1\text{H}\}$  NMR (101 MHz,  $\text{DMSO-}d_6$ ) spectrum of 9b

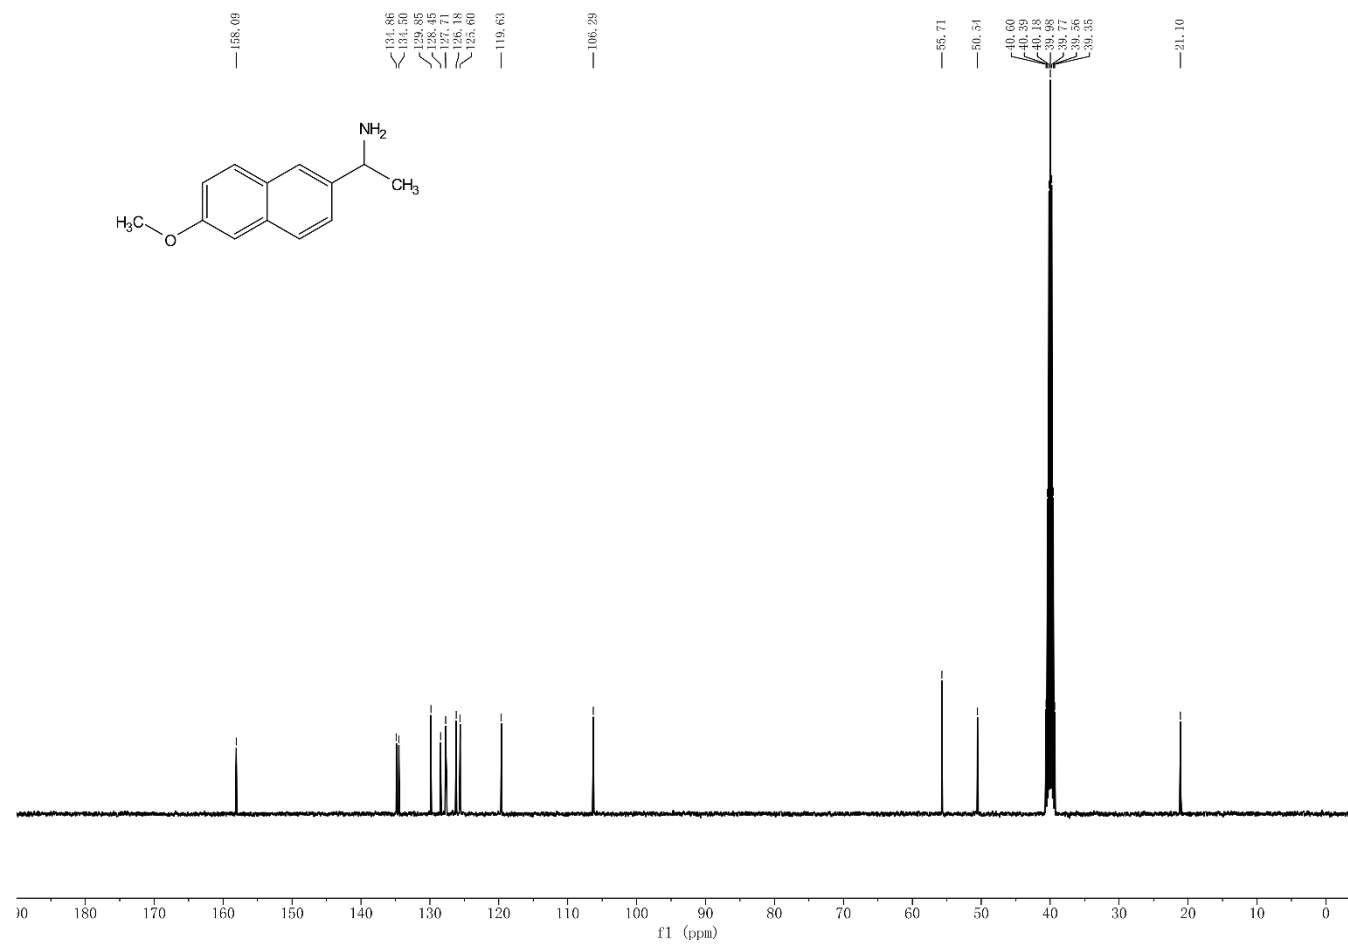

<sup>1</sup>H NMR (400 MHz, CDCl<sub>3</sub>) spectrum of 9c

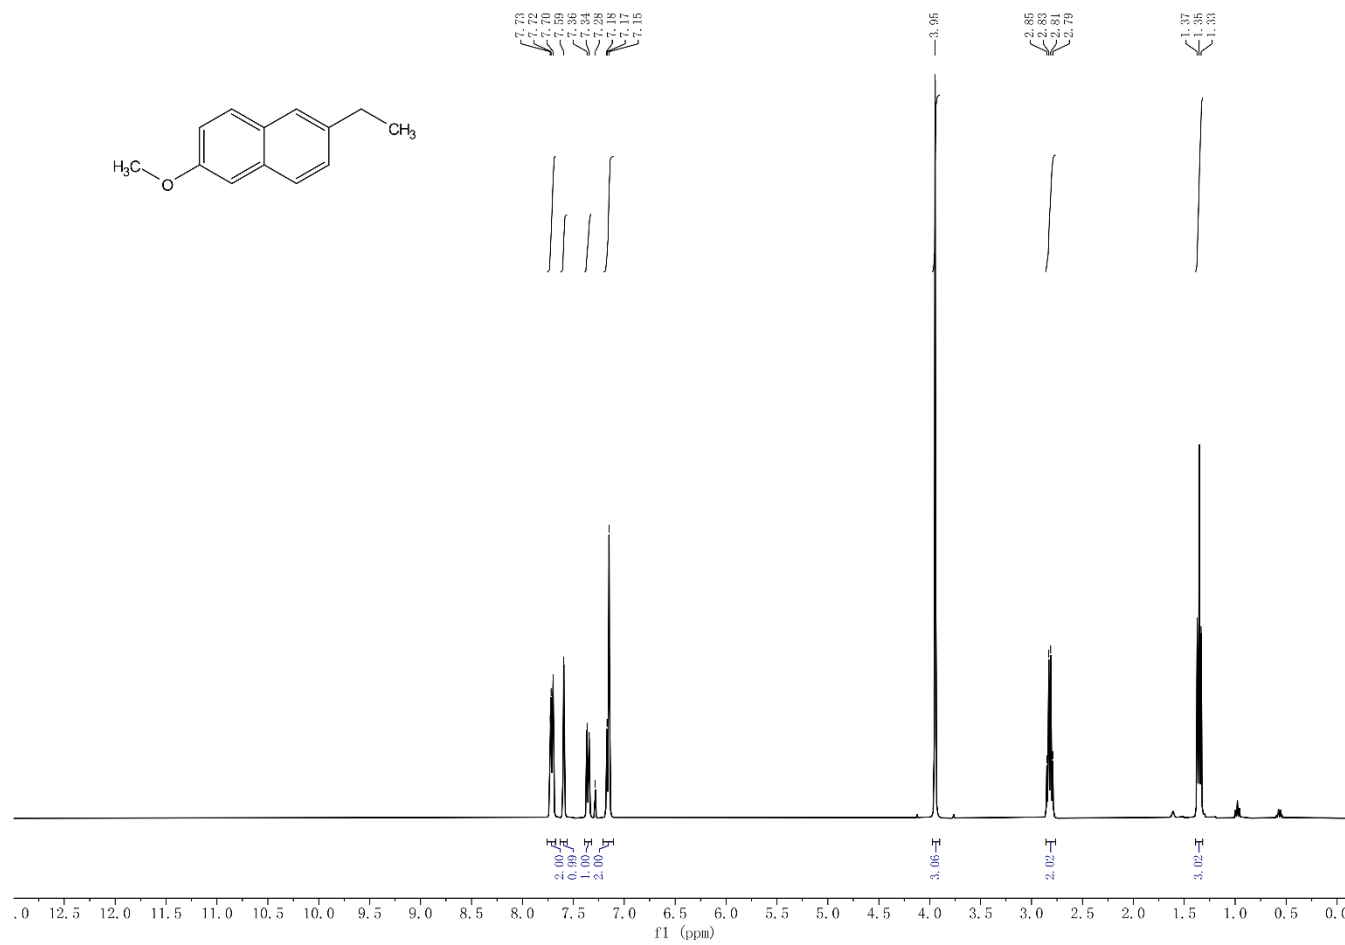

$^{13}\text{C}\{^1\text{H}\}$  NMR (101 MHz,  $\text{CDCl}_3$ ) spectrum of 9c

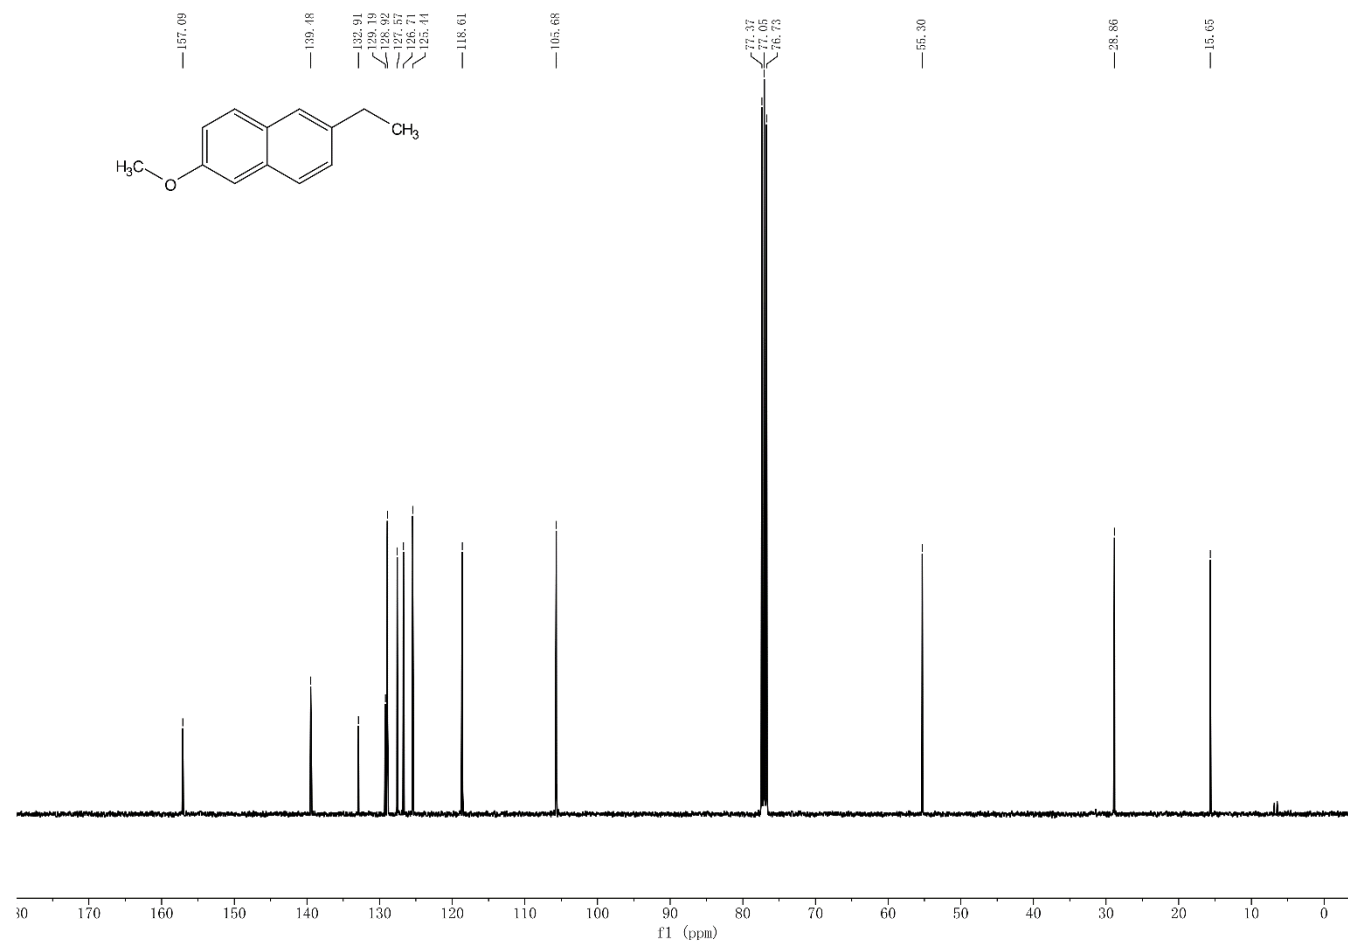

<sup>1</sup>H NMR (400 MHz, DMSO-*d*<sup>6</sup>) spectrum of 9d

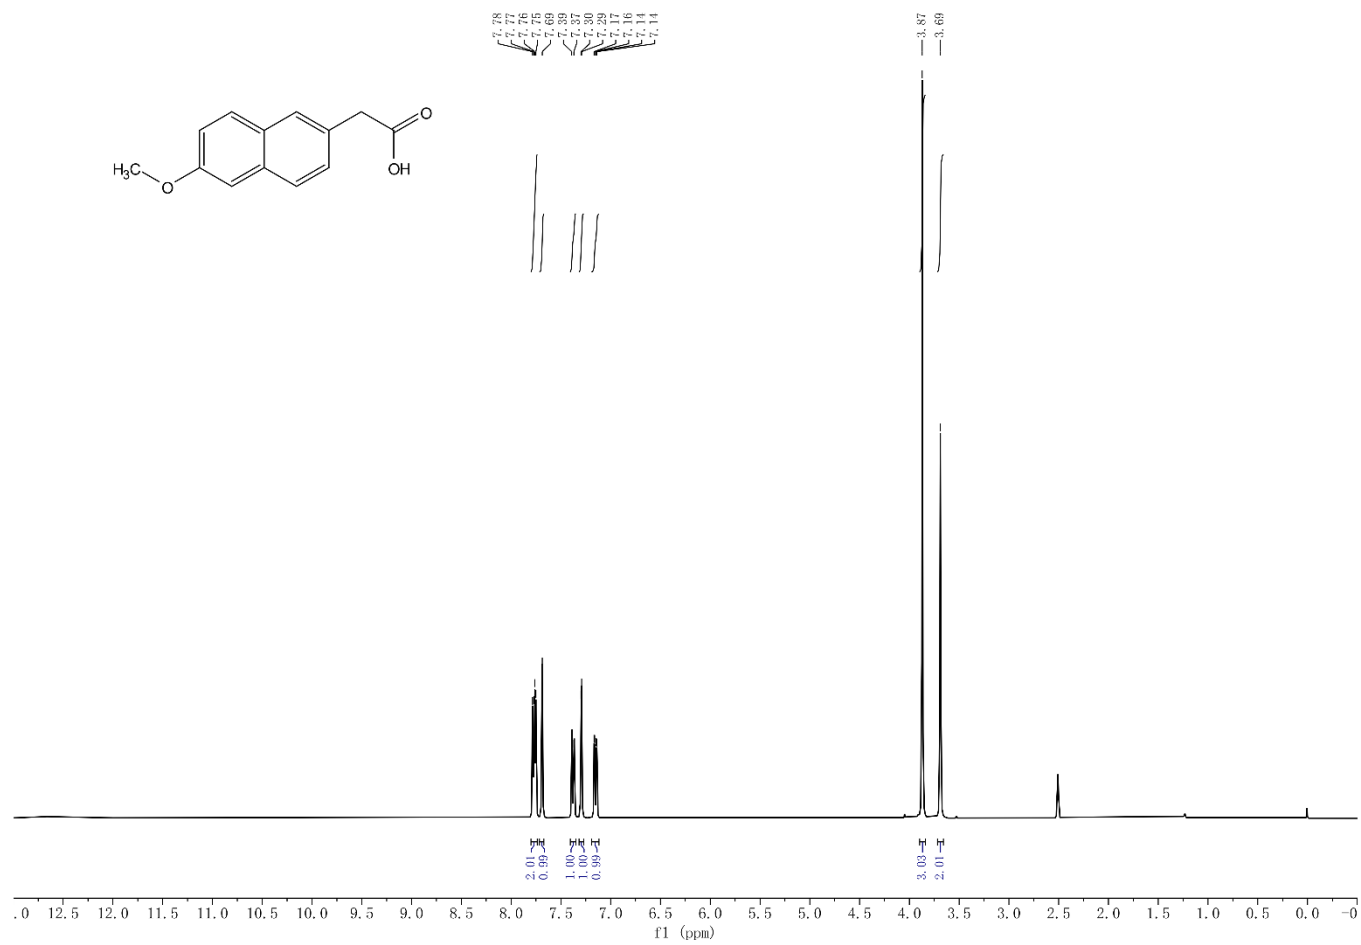



$^{13}\text{C}\{^1\text{H}\}$  NMR (101 MHz,  $\text{DMSO-}d_6$ ) spectrum of 9d

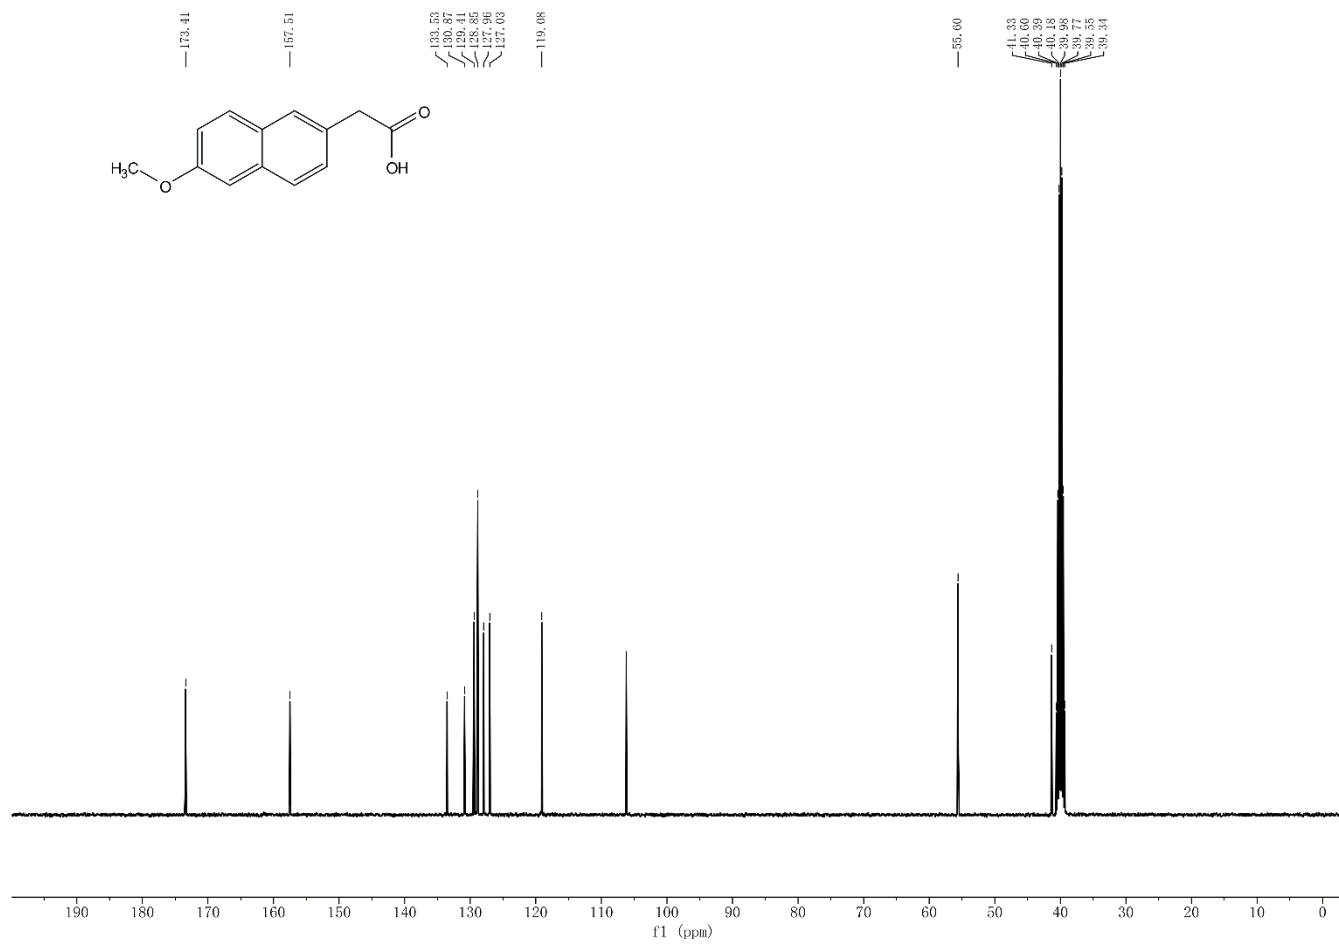

<sup>1</sup>H NMR (400 MHz, CDCl<sub>3</sub>) spectrum of 9e

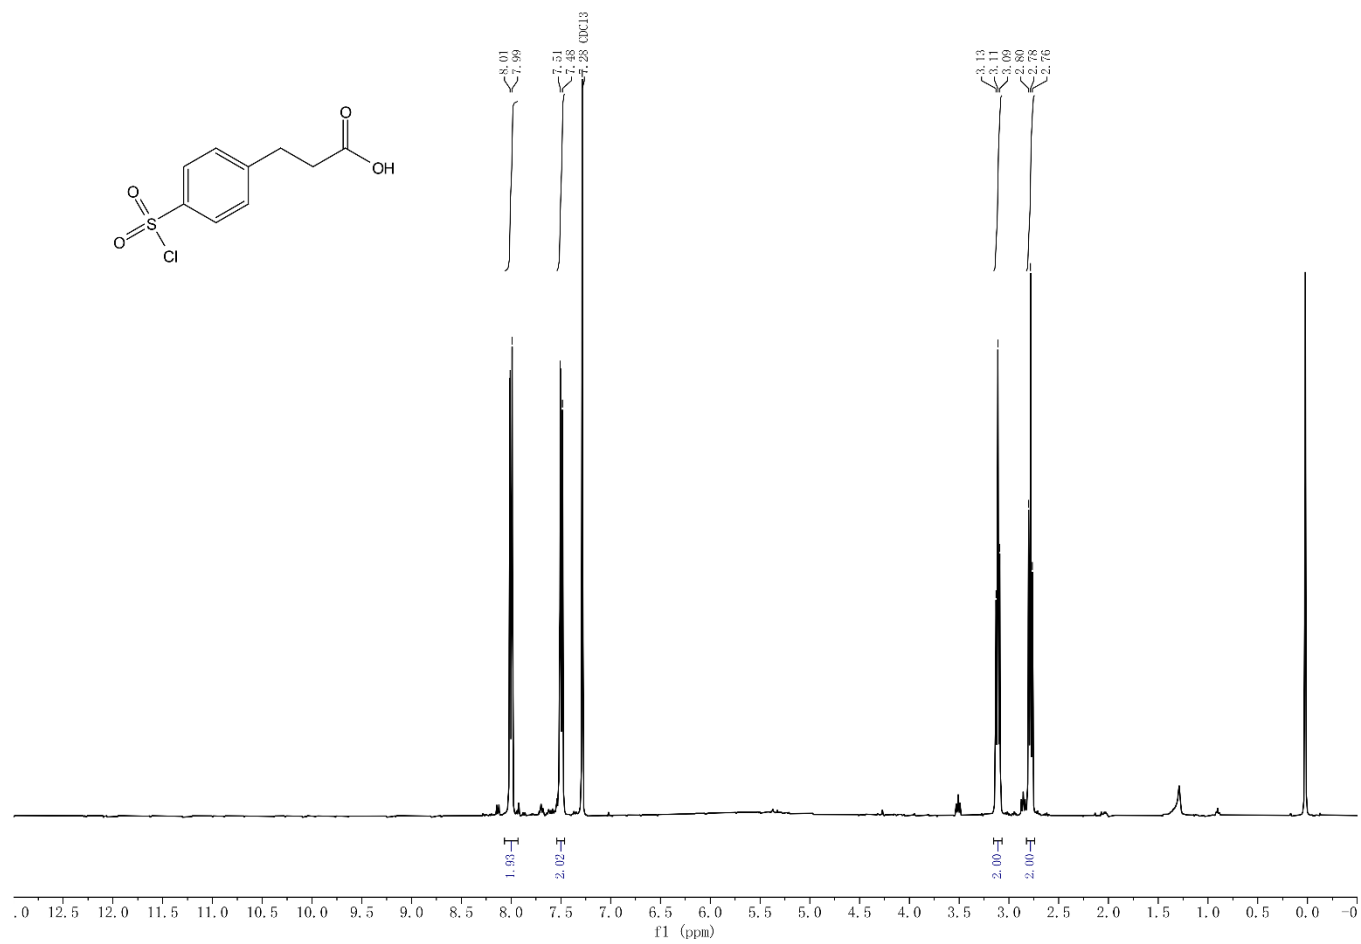

$^{13}\text{C}\{^1\text{H}\}$  NMR (101 MHz,  $\text{CDCl}_3$ ) spectrum of 9e

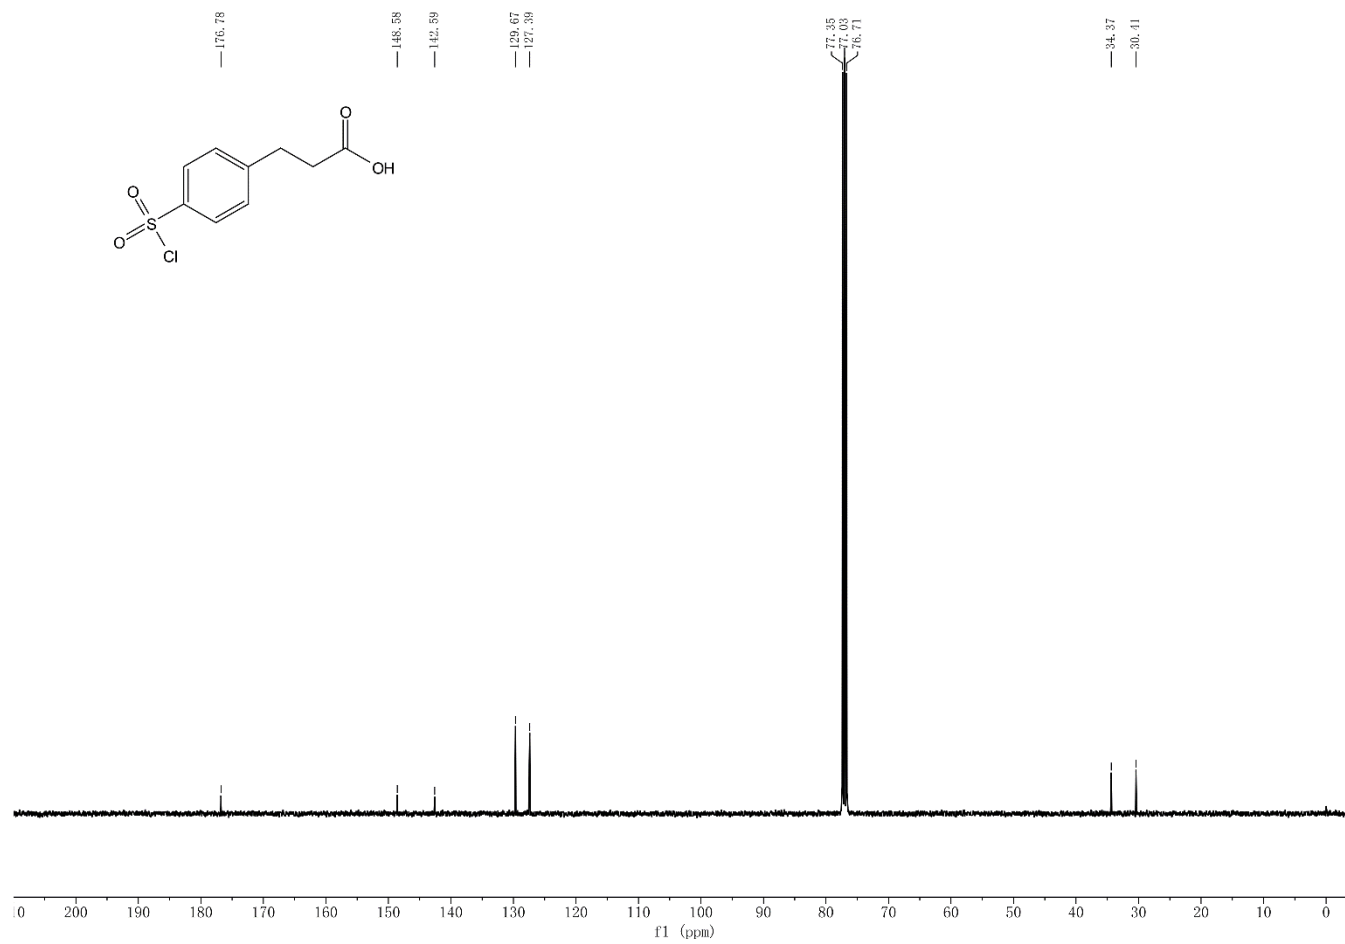

<sup>1</sup>H NMR (400 MHz, CDCl<sub>3</sub>) spectrum of 9f

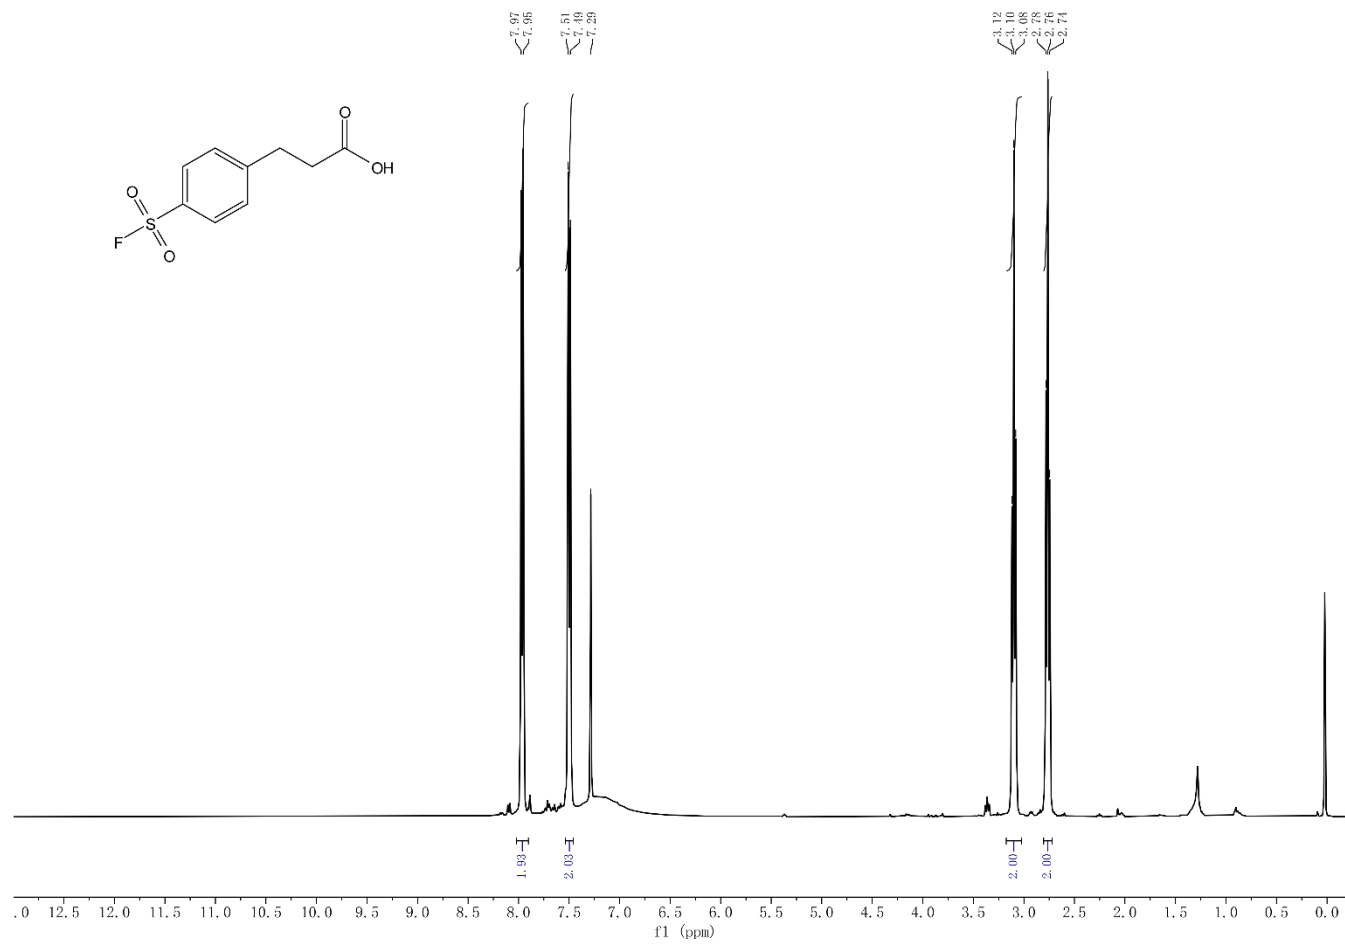

$^{13}\text{C}\{^1\text{H}\}$  NMR (101 MHz,  $\text{CDCl}_3$ ) spectrum of 9f

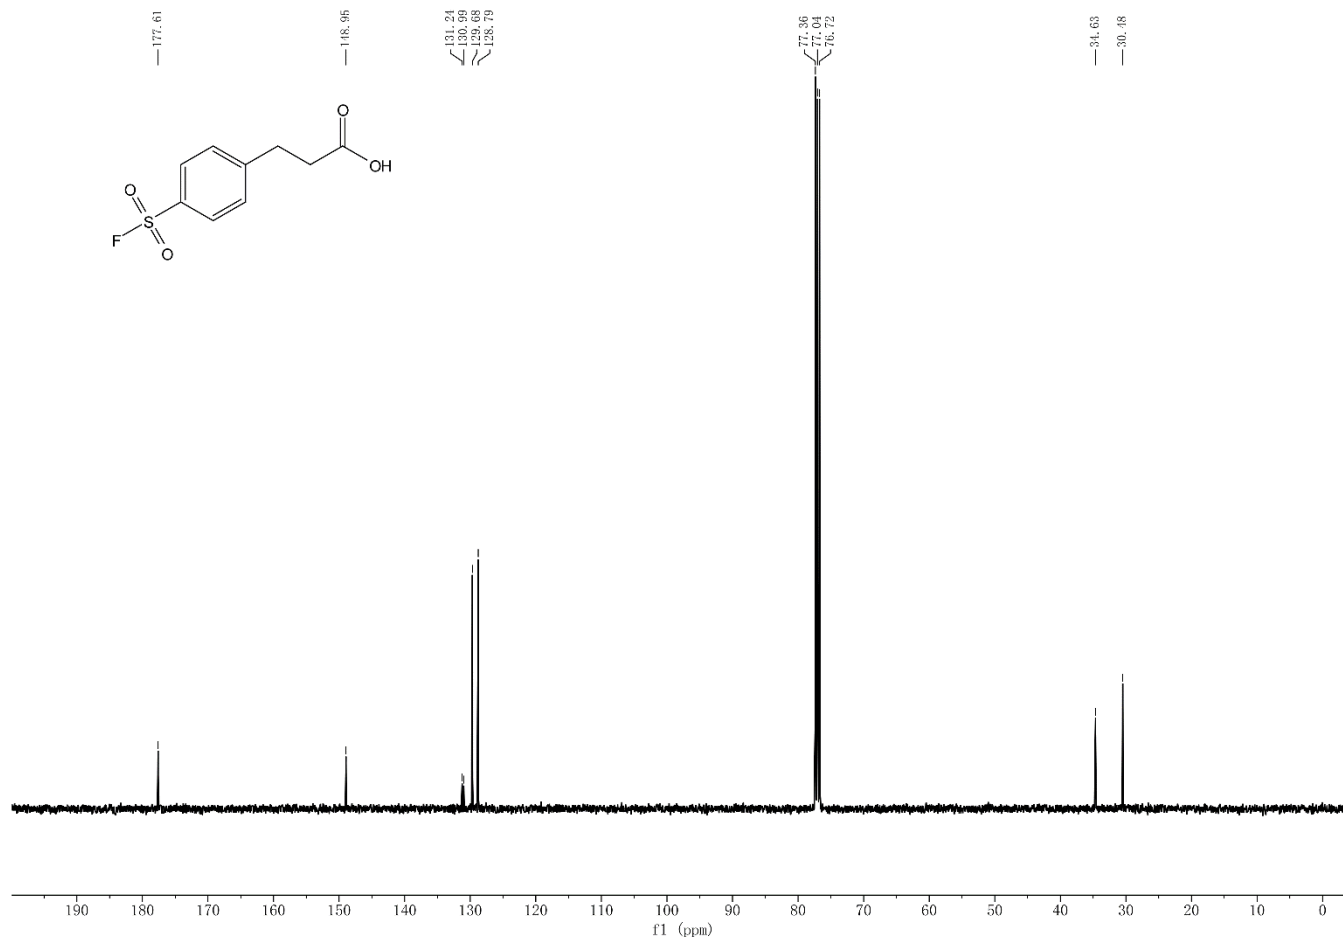

<sup>19</sup>F NMR (377 MHz, CDCl<sub>3</sub>) spectrum of 9f

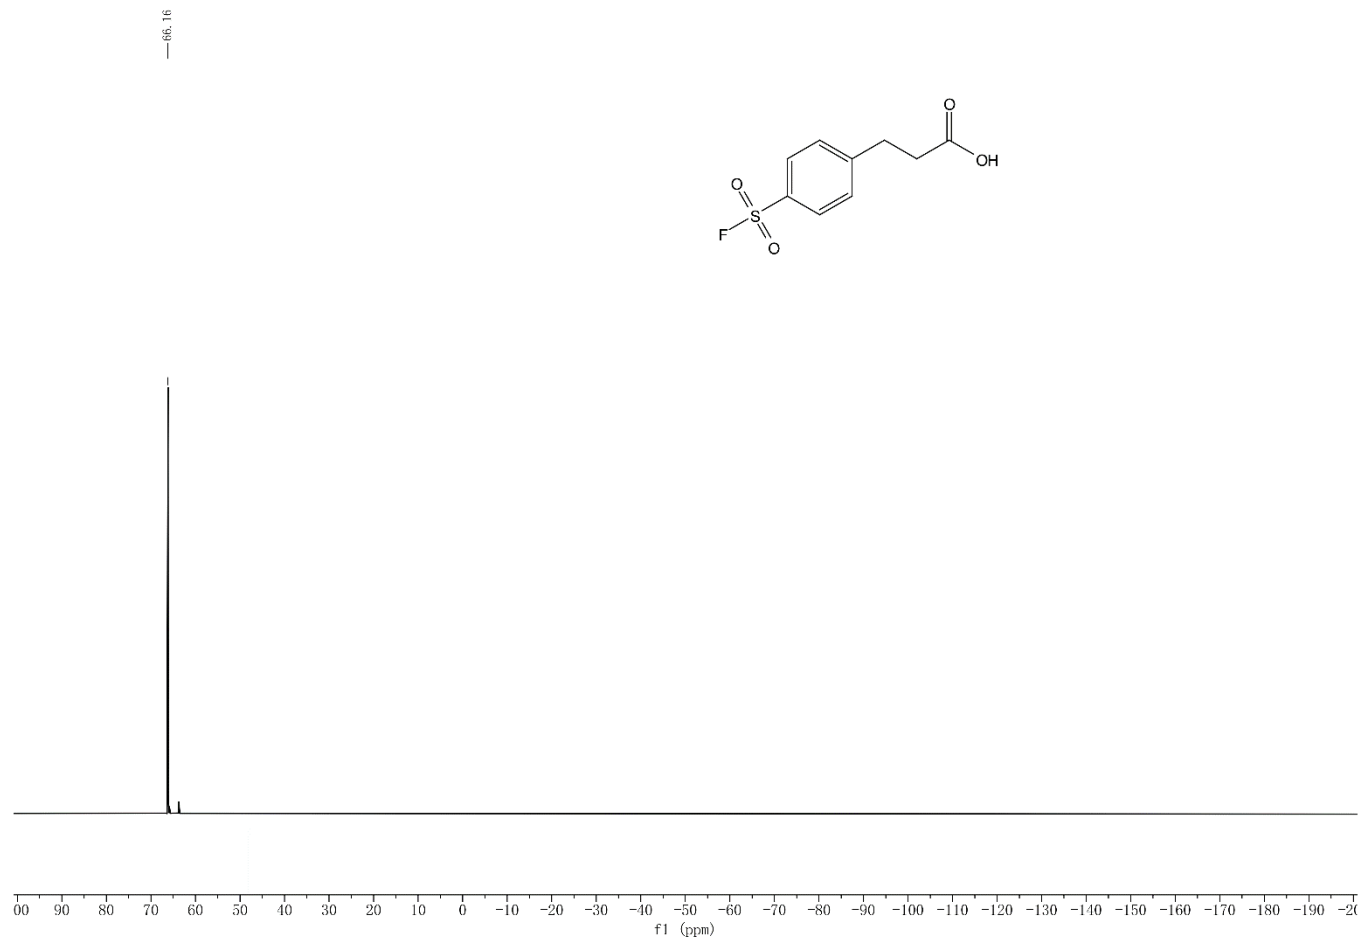

<sup>1</sup>H NMR (400 MHz, CDCl<sub>3</sub>) spectrum of 9g

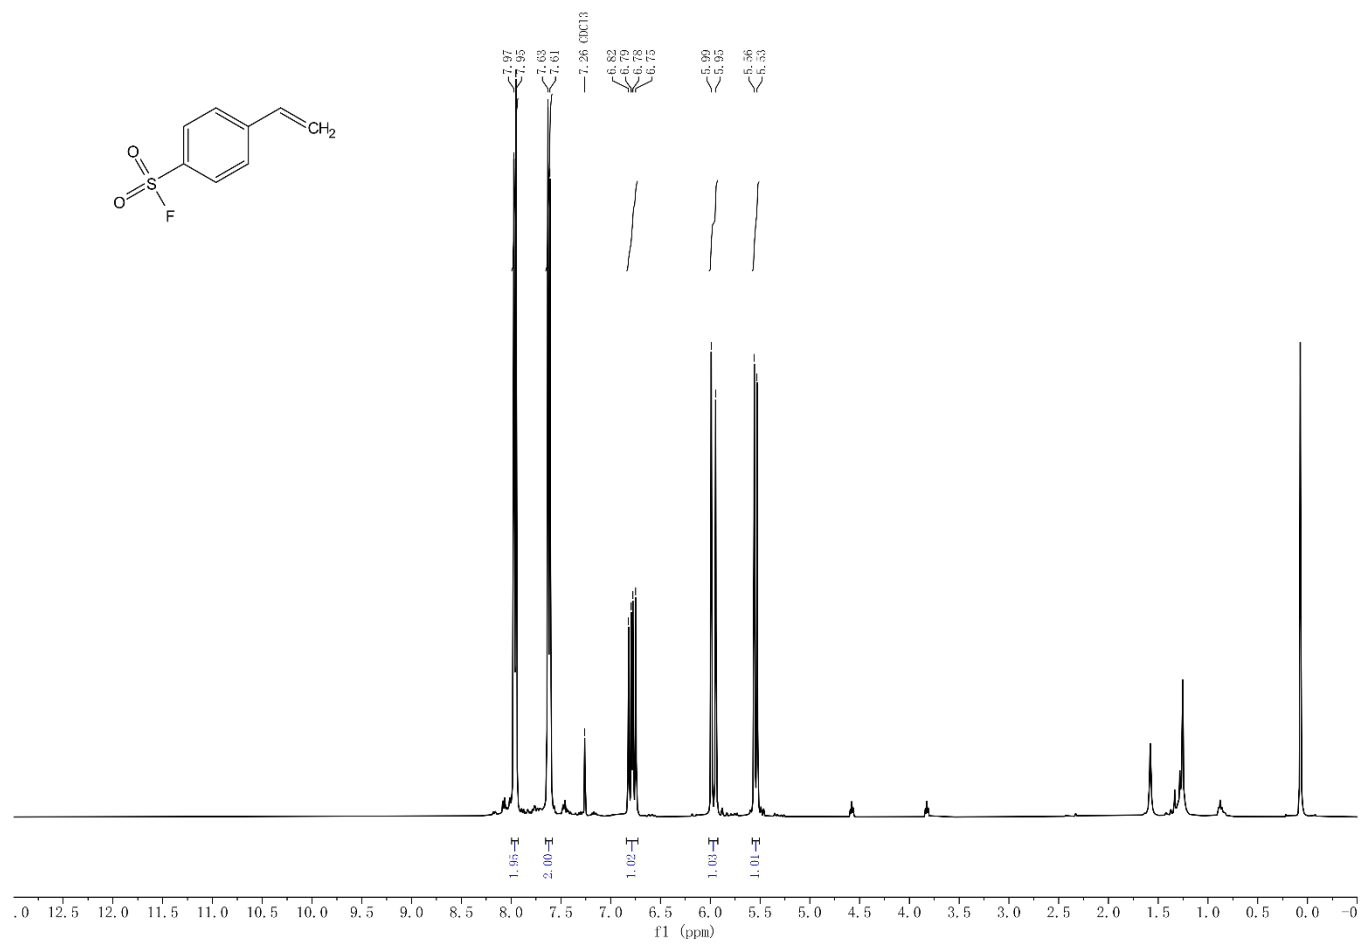

$^{13}\text{C}\{^1\text{H}\}$  NMR (101 MHz,  $\text{CDCl}_3$ ) spectrum of 9g

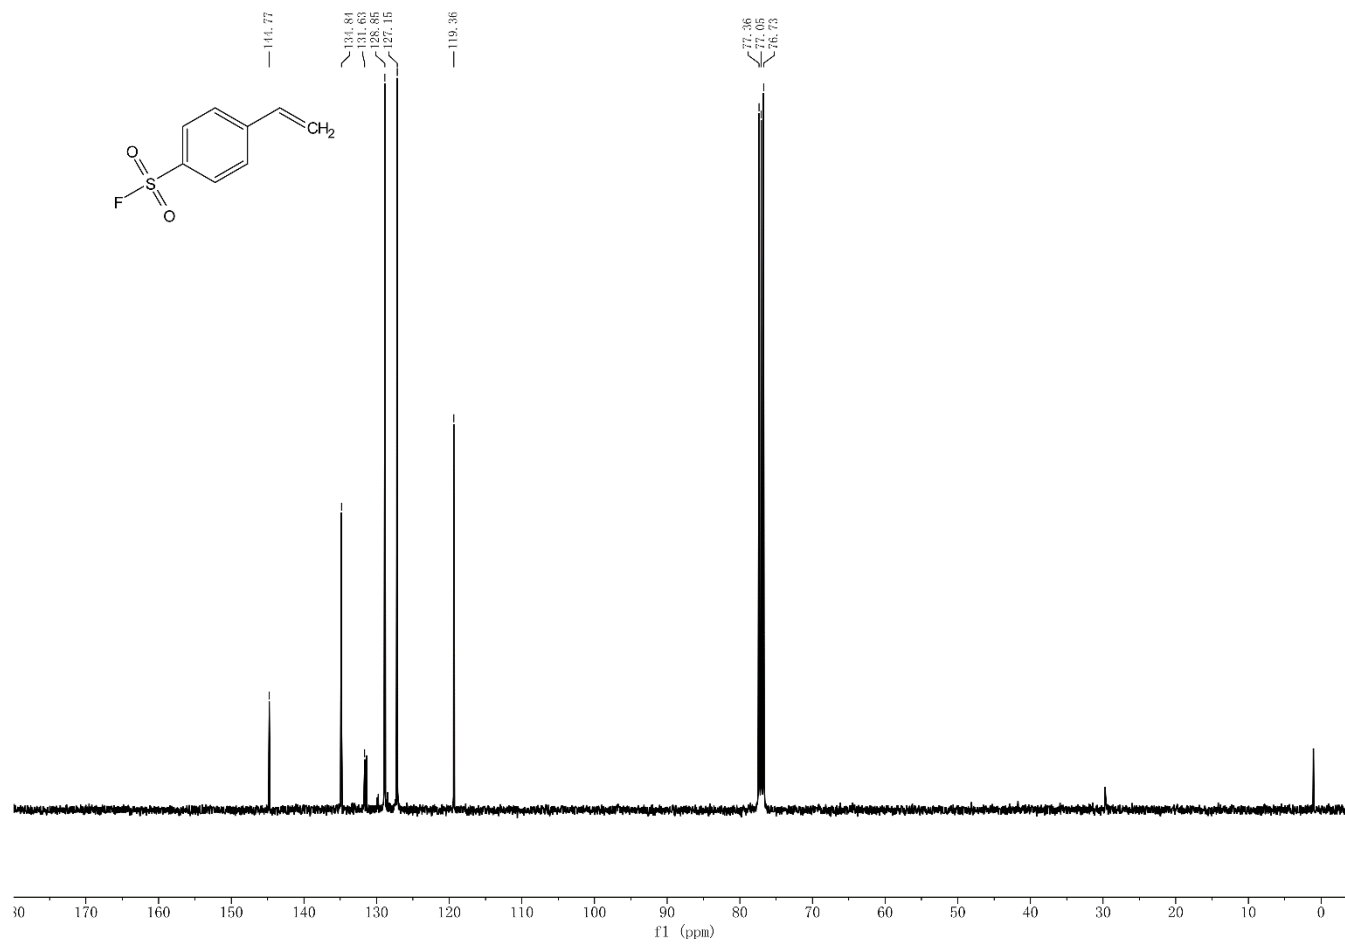



$^{19}\text{F}$  NMR (377 MHz,  $\text{CDCl}_3$ ) spectrum of 9g

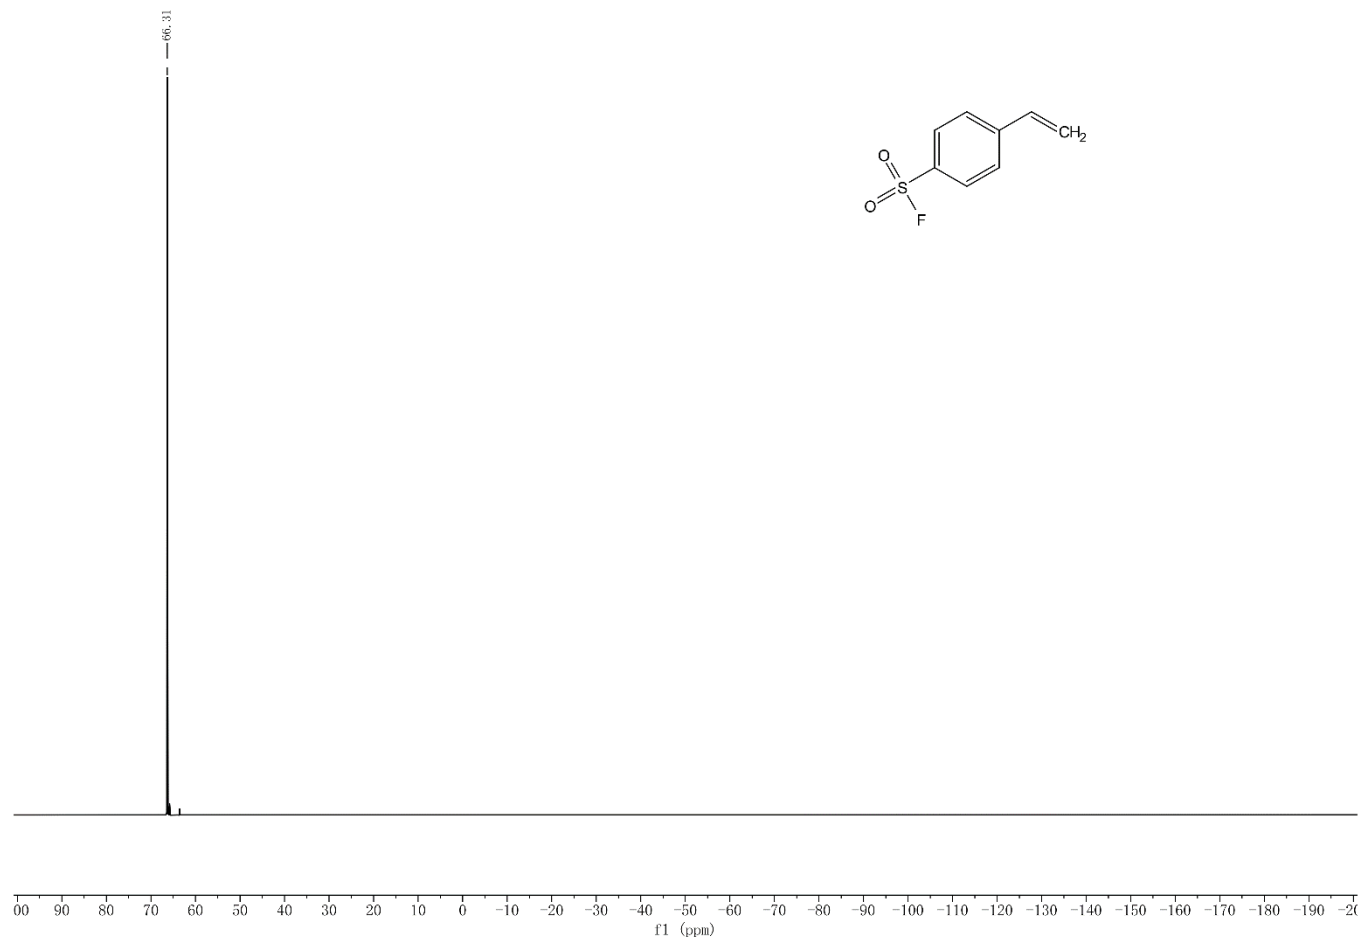

<sup>1</sup>H NMR (400 MHz, CDCl<sub>3</sub>) spectrum of 10a

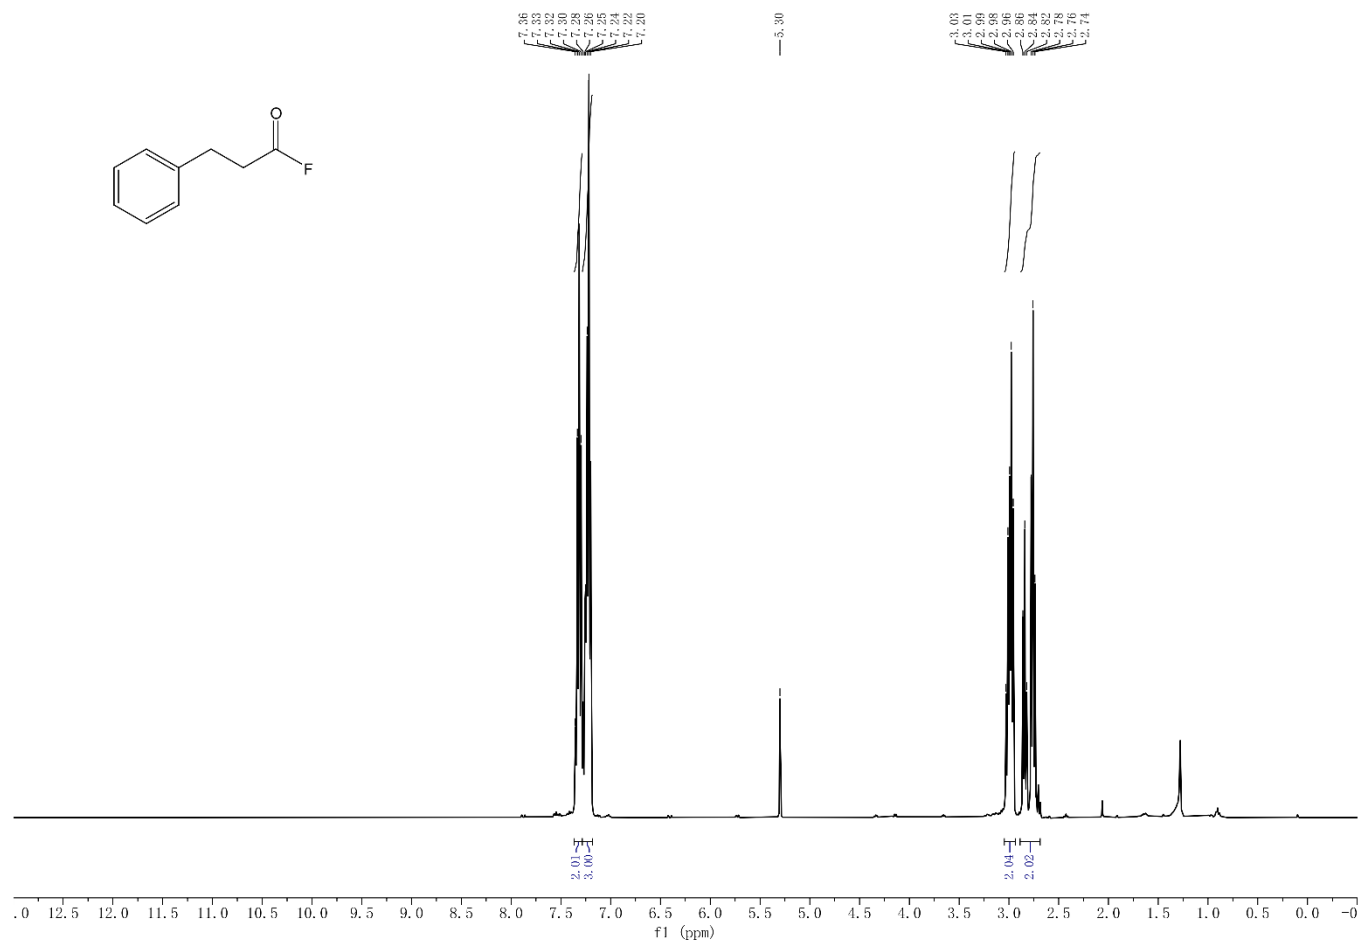

<sup>19</sup>F NMR (377 MHz, CDCl<sub>3</sub>) spectrum of 10a

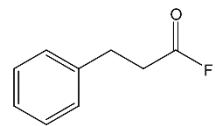

— 65.36

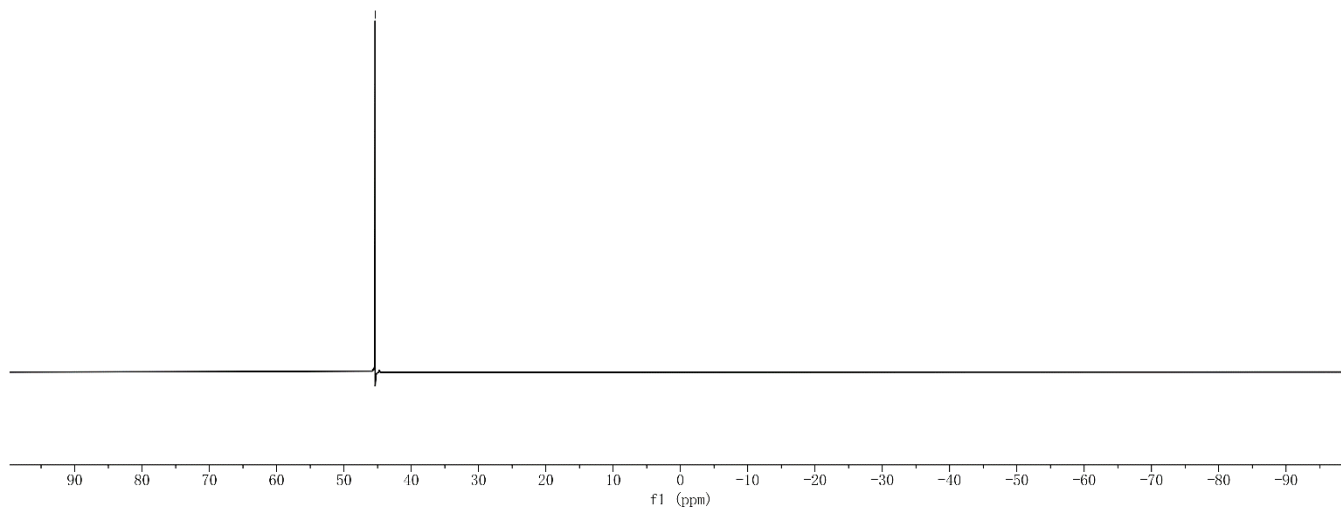

<sup>1</sup>H NMR (400 MHz, CDCl<sub>3</sub>) spectrum of 10b

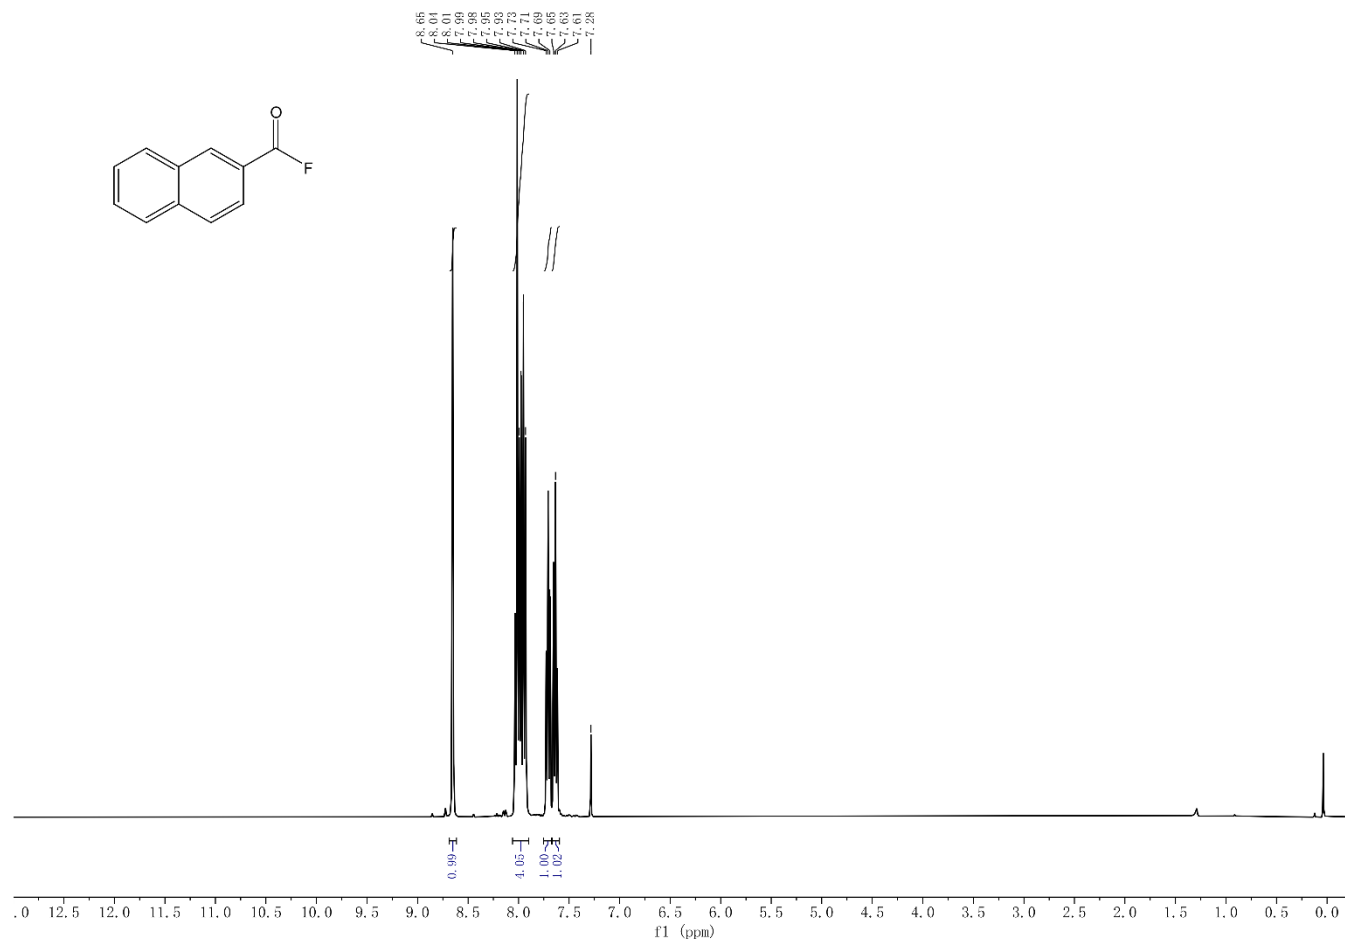

$^{13}\text{C}\{^1\text{H}\}$  NMR (101 MHz,  $\text{CDCl}_3$ ) spectrum of 10b

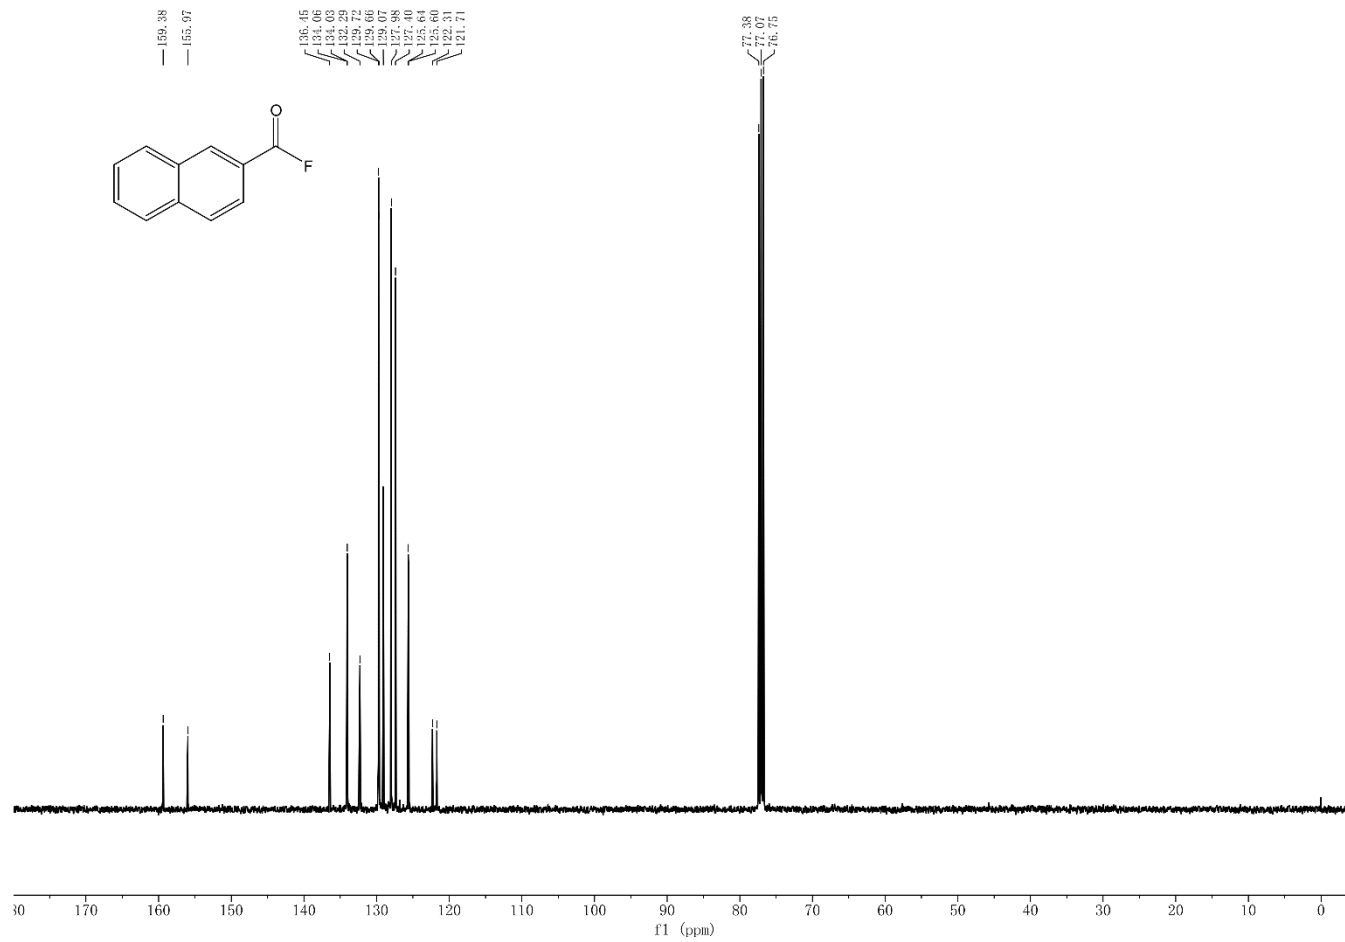

<sup>19</sup>F NMR (377 MHz, CDCl<sub>3</sub>) spectrum of 10b

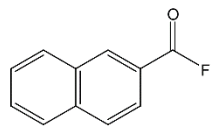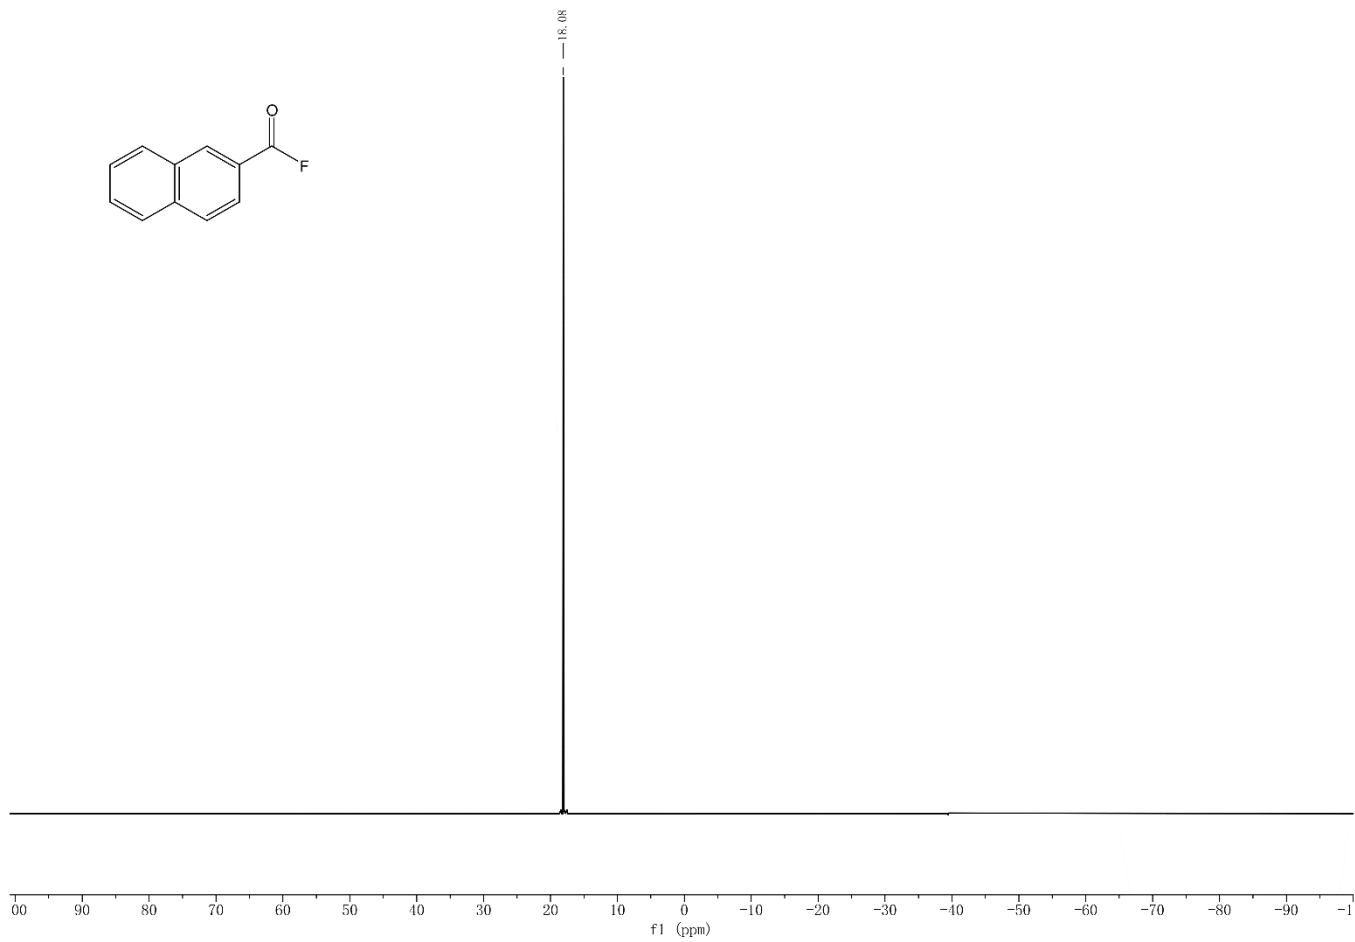

Table S13. Energies for all calculated species.

| Structures                                          | ZPE      | tcH      | tcG       | E            | H            | G            | Imaginary Frequency |
|-----------------------------------------------------|----------|----------|-----------|--------------|--------------|--------------|---------------------|
| <b>PhCOOH</b>                                       | 0.116039 | 0.124087 | 0.083949  | -420.741641  | -420.733592  | -420.773730  |                     |
| <b>Et<sub>3</sub>N</b>                              | 0.207095 | 0.217458 | 0.174120  | -292.235201  | -292.234257  | -292.277595  |                     |
| <b>HEt<sub>3</sub>N<sup>+</sup></b>                 | 0.224924 | 0.234574 | 0.192408  | -292.652123  | -292.651179  | -292.693344  |                     |
| <b>PhCOO<sup>-</sup></b>                            | 0.102429 | 0.110304 | 0.070704  | -420.216792  | -420.215847  | -420.255448  |                     |
| <b>SO<sub>2</sub>F<sub>2</sub></b>                  | 0.014857 | 0.020209 | -0.013072 | -748.225989  | -748.225045  | -748.258325  |                     |
| <b>PhCOOSO<sub>2</sub>F<sub>2</sub><sup>-</sup></b> | 0.119330 | 0.131787 | 0.080302  | -1168.468409 | -1168.467465 | -1168.518950 |                     |
| <b>F<sup>-</sup></b>                                | 0.000000 | 0.002360 | -0.014159 | -99.825875   | -99.824931   | -99.841450   |                     |
| <b>PhCOOSO<sub>2</sub>F</b>                         | 0.117591 | 0.129730 | 0.078473  | -1068.533238 | -1068.532294 | -1068.583552 |                     |
| <b>SO<sub>3</sub></b>                               | 0.011763 | 0.016308 | -0.014716 | -623.752036  | -623.751092  | -623.782116  |                     |
| <b>PhCOF</b>                                        | 0.103219 | 0.111101 | 0.071229  | -444.756363  | -444.755418  | -444.795291  |                     |
| <b>PdP<sub>2</sub></b>                              | 0.599422 | 0.637685 | 0.527695  | -2390.938055 | -2390.937111 | -2391.047100 |                     |
| <b>Ts4</b>                                          | 0.702176 | 0.748501 | 0.621311  | -2835.701219 | -2835.700274 | -2835.827464 | 153.30i             |
| <b>Int1</b>                                         | 0.703235 | 0.750125 | 0.621744  | -2835.717753 | -2835.716808 | -2835.845189 |                     |
| <b>Int1A</b>                                        | 0.730651 | 0.784749 | 0.639831  | -3697.295865 | -3697.294921 | -3697.439839 |                     |
| <b>Ts5</b>                                          | 0.699921 | 0.747088 | 0.619061  | -2835.674739 | -2835.673795 | -2835.801822 | 292.63i             |
| <b>Ts5A</b>                                         | 0.728360 | 0.782444 | 0.639513  | -3697.270839 | -3697.269895 | -3697.412826 | 331.53i             |
| <b>Ts5B</b>                                         | 0.758791 | 0.825412 | 0.653486  | -4955.862166 | -4955.861222 | -4956.033148 | 124.09i             |

|                               |          |          |           |              |              |              |         |
|-------------------------------|----------|----------|-----------|--------------|--------------|--------------|---------|
| <b>Int2</b>                   | 0.700945 | 0.748619 | 0.619272  | -2835.697821 | -2835.696876 | -2835.826223 |         |
| <b>Int2A</b>                  | 0.729338 | 0.783911 | 0.640061  | -3697.280438 | -3697.279494 | -3697.423344 |         |
| <b>Ts6</b>                    | 0.699715 | 0.747443 | 0.618186  | -2835.675479 | -2835.674535 | -2835.803792 | 27.48i  |
| <b>Ts6A</b>                   | 0.727036 | 0.782008 | 0.635268  | -3697.256566 | -3697.255622 | -3697.402361 | 74.52i  |
| <b>CO</b>                     | 0.005039 | 0.008344 | -0.014098 | -113.296017  | -113.295073  | -113.317515  |         |
| <b>Int3</b>                   | 0.693500 | 0.738259 | 0.616026  | -2722.374240 | -2722.373296 | -2722.495529 |         |
| <b>Int3A</b>                  | 0.720674 | 0.772889 | 0.631802  | -3583.950022 | -3583.949078 | -3584.090165 |         |
| <b>MeOPhB(OH)<sub>2</sub></b> | 0.156900 | 0.166903 | 0.122376  | -522.645778  | -522.644834  | -522.689361  |         |
| <b>Ts7</b>                    | 0.850595 | 0.907259 | 0.758134  | -3245.027083 | -3245.026139 | -3245.175263 | 200.00i |
| <b>FB(OH)<sub>2</sub></b>     | 0.036157 | 0.041256 | 0.009767  | -276.463773  | -276.462829  | -276.494318  |         |
| <b>Int4</b>                   | 0.813988 | 0.865490 | 0.727590  | -2968.578982 | -2968.578037 | -2968.715938 |         |
| <b>Ts8</b>                    | 0.812628 | 0.863696 | 0.727042  | -2968.566063 | -2968.565119 | -2968.701773 | 386.84i |
| <b>product</b>                | 0.215131 | 0.227500 | 0.177185  | -577.666960  | -577.666016  | -577.716331  |         |

---



## V. Cartesian Coordinates of the Structures

### PhCOOH

|   |          |          |          |
|---|----------|----------|----------|
| C | -1.49358 | 1.62495  | 0.60027  |
| C | -0.18724 | 1.58964  | 0.09415  |
| C | 0.36613  | 2.73315  | -0.49752 |
| C | -0.38685 | 3.91198  | -0.58309 |
| C | -1.69318 | 3.94729  | -0.07697 |
| C | -2.24655 | 2.80378  | 0.51471  |
| H | -1.91609 | 0.75185  | 1.05203  |
| H | 1.36354  | 2.70619  | -0.88395 |
| H | 0.03566  | 4.78507  | -1.03485 |
| H | -2.26809 | 4.84736  | -0.1423  |
| H | -3.24397 | 2.83075  | 0.90114  |
| C | 0.6402   | 0.29422  | 0.18818  |
| O | 0.07553  | -0.87263 | 0.79193  |
| H | 0.71706  | -1.58648 | 0.77022  |
| O | 1.81323  | 0.26251  | -0.2663  |

### Et<sub>3</sub>N

|   |          |          |          |
|---|----------|----------|----------|
| N | 0.45509  | -0.188   | 0.00375  |
| C | 0.99673  | 0.21773  | -1.30121 |
| H | 0.63947  | 1.19587  | -1.54716 |
| H | 2.0657   | 0.22946  | -1.25565 |
| C | 0.89121  | 0.76621  | 1.03341  |
| H | 0.49695  | 0.47089  | 1.98328  |
| H | 1.96017  | 0.77794  | 1.07897  |
| C | 0.94591  | -1.53181 | 0.34164  |
| H | 0.62847  | -2.22636 | -0.40784 |
| H | 2.01488  | -1.52007 | 0.3872   |
| C | 0.37848  | -1.95685 | 1.70874  |
| H | 0.73575  | -2.93499 | 1.95469  |
| H | 0.69593  | -1.26229 | 2.45822  |
| H | -0.69048 | -1.96858 | 1.66318  |
| C | 0.37701  | 2.17401  | 0.67942  |
| H | 0.69446  | 2.86857  | 1.4289   |
| H | 0.77127  | 2.46933  | -0.27044 |
| H | -0.69195 | 2.16228  | 0.63386  |
| C | 0.53985  | -0.78192 | -2.3799  |
| H | 0.9341   | -0.4866  | -3.32976 |
| H | 0.89711  | -1.76006 | -2.13395 |
| H | -0.52912 | -0.79365 | -2.42546 |

### HEt<sub>3</sub>N<sup>+</sup>

|   |          |          |          |
|---|----------|----------|----------|
| N | 0.05142  | 0.06992  | -0.31857 |
| C | -1.24089 | -0.55331 | 0.0015   |
| H | -1.95334 | -0.30729 | -0.75796 |
| H | -1.12253 | -1.61569 | 0.04884  |
| C | 1.14248  | -0.78864 | 0.1645   |
| H | 1.65561  | -1.21727 | -0.67089 |
| H | 1.82754  | -0.20378 | 0.74203  |
| C | 0.13656  | 1.38432  | 0.3341   |

|   |          |          |          |
|---|----------|----------|----------|
| H | -0.11164 | 2.14959  | -0.37136 |
| H | -0.54888 | 1.42002  | 1.15495  |
| C | 1.56951  | 1.60855  | 0.85177  |
| H | 1.63149  | 2.56529  | 1.32685  |
| H | 1.81772  | 0.84328  | 1.55723  |
| H | 2.25495  | 1.57286  | 0.03092  |
| C | 0.56102  | -1.91292 | 1.04171  |
| H | 1.3552   | -2.53785 | 1.39333  |
| H | 0.0479   | -1.48429 | 1.8771   |
| H | -0.12403 | -2.49778 | 0.46418  |
| C | -1.73967 | -0.03125 | 1.36175  |
| H | -2.68032 | -0.48489 | 1.59473  |
| H | -1.02721 | -0.27726 | 2.12121  |
| H | -1.85802 | 1.03113  | 1.31441  |
| H | 0.13039  | 0.18377  | -1.30893 |

### PhCOO<sup>-</sup>

|   |          |          |          |
|---|----------|----------|----------|
| C | -1.49358 | 1.62495  | 0.60027  |
| C | -0.18724 | 1.58964  | 0.09415  |
| C | 0.36613  | 2.73315  | -0.49752 |
| C | -0.38685 | 3.91198  | -0.58309 |
| C | -1.69318 | 3.94729  | -0.07697 |
| C | -2.24655 | 2.80378  | 0.51471  |
| H | -1.91609 | 0.75185  | 1.05203  |
| H | 1.36354  | 2.70619  | -0.88395 |
| H | 0.03566  | 4.78507  | -1.03485 |
| H | -2.26809 | 4.84736  | -0.1423  |
| H | -3.24397 | 2.83075  | 0.90114  |
| C | 0.6402   | 0.29422  | 0.18818  |
| O | 0.07553  | -0.87263 | 0.79193  |
| O | 1.81323  | 0.26251  | -0.2663  |

### SO<sub>2</sub>F<sub>2</sub>

|   |          |         |          |
|---|----------|---------|----------|
| S | -0.24769 | 2.59011 | 0.       |
| O | 0.30898  | 3.37735 | 1.36355  |
| O | 0.30895  | 1.01561 | 0.       |
| F | -1.83769 | 2.59013 | 0.       |
| F | 0.28231  | 3.33964 | -1.29823 |

### PhCOOSO<sub>2</sub>F<sub>2</sub><sup>-</sup>

|   |          |          |          |
|---|----------|----------|----------|
| C | 2.16179  | -1.15796 | -0.00145 |
| C | 1.79467  | 0.18193  | -0.00024 |
| C | 2.77908  | 1.16294  | 0.00131  |
| C | 4.116    | 0.80917  | 0.0017   |
| C | 4.47799  | -0.52858 | 0.00046  |
| C | 3.49983  | -1.51027 | -0.00114 |
| H | 1.38181  | -1.90364 | -0.00259 |
| H | 2.46744  | 2.19678  | 0.00215  |
| H | 4.88089  | 1.57427  | 0.00297  |
| H | 5.52389  | -0.80645 | 0.00073  |
| H | 3.78539  | -2.55371 | -0.00213 |
| C | 0.33799  | 0.5976   | -0.00072 |
| O | 0.04546  | 1.77569  | -0.00279 |
| O | -0.47577 | -0.40474 | 0.00127  |
| S | -2.28312 | 0.01148  | 0.00001  |

|   |          |          |          |
|---|----------|----------|----------|
| O | -2.26172 | 0.61219  | -1.29091 |
| O | -2.26243 | 0.61644  | 1.28898  |
| F | -3.99905 | -0.23027 | 0.00004  |
| F | -2.32073 | -1.63822 | 0.00293  |

### F<sup>-</sup>

|   |          |         |         |
|---|----------|---------|---------|
| F | -1.45564 | 3.32257 | 1.78112 |
|---|----------|---------|---------|

### PhCOOSO<sub>2</sub>F

|   |          |          |          |
|---|----------|----------|----------|
| C | -1.48798 | 1.59713  | 0.56725  |
| C | -0.18427 | 1.57344  | 0.05372  |
| C | 0.37164  | 2.73424  | -0.50073 |
| C | -0.37616 | 3.91874  | -0.54166 |
| C | -1.67987 | 3.94244  | -0.02813 |
| C | -2.23578 | 2.78163  | 0.52633  |
| H | -1.91242 | 0.71083  | 0.99059  |
| H | 1.36705  | 2.71615  | -0.89282 |
| H | 0.04828  | 4.80504  | -0.96499 |
| H | -2.25083 | 4.84683  | -0.05938 |
| H | -3.23118 | 2.79972  | 0.91842  |
| C | 0.63749  | 0.27179  | 0.0987   |
| O | 0.07024  | -0.91271 | 0.66447  |
| O | 1.80816  | 0.25051  | -0.36243 |
| S | 1.28386  | -1.85008 | 1.3258   |
| O | 2.31778  | -0.88031 | 2.20867  |
| O | 2.13547  | -2.60257 | 0.10211  |
| F | 0.64416  | -2.9494  | 2.27993  |

### SO<sub>3</sub>

|   |          |         |          |
|---|----------|---------|----------|
| S | 0.04053  | 1.74221 | -0.25759 |
| O | 0.77281  | 3.01637 | -0.25759 |
| O | 0.87266  | 0.29429 | -0.25759 |
| O | -1.62947 | 1.74221 | -0.25759 |

### PhCOF

|   |          |          |          |
|---|----------|----------|----------|
| C | -1.48798 | 1.59713  | 0.56725  |
| C | -0.18427 | 1.57344  | 0.05372  |
| C | 0.37164  | 2.73424  | -0.50073 |
| C | -0.37616 | 3.91874  | -0.54166 |
| C | -1.67987 | 3.94244  | -0.02813 |
| C | -2.23578 | 2.78163  | 0.52633  |
| H | -1.91242 | 0.71083  | 0.99059  |
| H | 1.36705  | 2.71615  | -0.89282 |
| H | 0.04828  | 4.80504  | -0.96499 |
| H | -2.25083 | 4.84683  | -0.05938 |
| H | -3.23118 | 2.79972  | 0.91842  |
| C | 0.63749  | 0.27179  | 0.0987   |
| O | 1.80816  | 0.25051  | -0.36243 |
| F | 0.10197  | -0.84644 | 0.63282  |

### PdP<sub>2</sub>

|   |          |         |         |
|---|----------|---------|---------|
| C | -3.50793 | 1.73308 | 0.85969 |
| C | -2.31205 | 1.12305 | 0.45834 |
| C | -1.27505 | 1.96321 | 0.0235  |

|   |          |          |          |
|---|----------|----------|----------|
| C | -1.38745 | 3.35531  | -0.02999 |
| C | -2.59007 | 3.92621  | 0.39752  |
| C | -3.64117 | 3.12141  | 0.83852  |
| C | -0.20866 | 4.13181  | -0.62191 |
| C | 1.07428  | 3.44581  | -0.14433 |
| C | 1.07011  | 2.04801  | -0.07016 |
| C | 2.19661  | 1.29324  | 0.29833  |
| C | 3.37315  | 2.00102  | 0.58549  |
| C | 3.4042   | 3.39285  | 0.52658  |
| C | 2.2623   | 4.11056  | 0.16985  |
| H | -4.33298 | 1.11679  | 1.19898  |
| H | -2.71475 | 5.00315  | 0.37964  |
| H | -4.57204 | 3.57843  | 1.16151  |
| H | 4.26512  | 1.45786  | 0.87451  |
| H | 4.32341  | 3.92156  | 0.7614   |
| H | 2.30391  | 5.19328  | 0.13152  |
| C | -0.24577 | 5.61748  | -0.24508 |
| H | -0.19173 | 5.76355  | 0.83885  |
| H | 0.58634  | 6.15509  | -0.70938 |
| H | -1.16451 | 6.08464  | -0.61174 |
| C | -0.27937 | 4.00681  | -2.168   |
| H | 0.57602  | 4.5134   | -2.62923 |
| H | -0.26849 | 2.95883  | -2.48215 |
| H | -1.20138 | 4.46552  | -2.5428  |
| O | -0.09272 | 1.36728  | -0.37275 |
| P | -2.01861 | -0.69836 | 0.52469  |
| P | 2.06213  | -0.53937 | 0.50955  |
| C | 3.74096  | -0.97913 | 1.1296   |
| C | 4.86155  | -1.10257 | 0.29434  |
| C | 3.88899  | -1.19615 | 2.50626  |
| C | 6.10623  | -1.4328  | 0.82999  |
| H | 4.75755  | -0.94016 | -0.77404 |
| C | 5.13632  | -1.51769 | 3.04331  |
| H | 3.01709  | -1.11621 | 3.15117  |
| C | 6.24605  | -1.63863 | 2.20508  |
| H | 6.96772  | -1.52888 | 0.17461  |
| H | 5.23902  | -1.68342 | 4.1122   |
| H | 7.21614  | -1.89801 | 2.62001  |
| C | 2.12379  | -1.1801  | -1.21652 |
| C | 2.25163  | -2.56801 | -1.39281 |
| C | 2.00014  | -0.36273 | -2.34512 |
| C | 2.277    | -3.12081 | -2.67047 |
| H | 2.33476  | -3.21328 | -0.52205 |
| C | 2.00301  | -0.92103 | -3.62551 |
| H | 1.90621  | 0.71138  | -2.23041 |
| C | 2.14759  | -2.29738 | -3.79311 |
| H | 2.38786  | -4.19518 | -2.7911  |
| H | 1.89689  | -0.27437 | -4.49222 |
| H | 2.15445  | -2.72873 | -4.79026 |
| C | -3.65359 | -1.32257 | 1.10342  |
| C | -4.73469 | -1.58635 | 0.25068  |
| C | -3.80344 | -1.54054 | 2.48116  |
| C | -5.9436  | -2.05235 | 0.76929  |
| H | -4.6309  | -1.43003 | -0.81823 |
| C | -5.01612 | -1.99337 | 3.00041  |
| H | -2.95978 | -1.35492 | 3.14195  |
| C | -6.0883  | -2.25248 | 2.14382  |

|    |          |          |          |
|----|----------|----------|----------|
| H  | -6.77361 | -2.25851 | 0.09879  |
| H  | -5.1203  | -2.1548  | 4.06985  |
| H  | -7.03048 | -2.61579 | 2.54482  |
| C  | -2.00776 | -1.12801 | -1.26728 |
| C  | -2.61669 | -0.32408 | -2.24104 |
| C  | -1.33973 | -2.29394 | -1.66659 |
| C  | -2.56338 | -0.6847  | -3.5884  |
| H  | -3.12716 | 0.58786  | -1.94719 |
| C  | -1.29545 | -2.65816 | -3.01129 |
| H  | -0.83269 | -2.89651 | -0.91871 |
| C  | -1.90492 | -1.85304 | -3.97544 |
| H  | -3.03451 | -0.05077 | -4.33497 |
| H  | -0.76356 | -3.55669 | -3.30748 |
| H  | -1.85813 | -2.12989 | -5.02514 |
| Pd | 0.04871  | -1.11819 | 1.39311  |

#### Ts4

|   |          |          |          |
|---|----------|----------|----------|
| C | 1.54956  | 3.42953  | -1.16185 |
| C | 0.72153  | 2.42579  | -0.6393  |
| C | -0.65883 | 2.58901  | -0.80464 |
| C | -1.23936 | 3.66988  | -1.47578 |
| C | -0.37706 | 4.6301   | -2.01141 |
| C | 1.00422  | 4.51326  | -1.84925 |
| C | -2.76928 | 3.75041  | -1.50116 |
| C | -3.29544 | 2.32121  | -1.65209 |
| C | -2.60726 | 1.31129  | -0.97597 |
| C | -2.98915 | -0.03352 | -0.99029 |
| C | -4.14414 | -0.36999 | -1.70915 |
| C | -4.85699 | 0.61428  | -2.39307 |
| C | -4.43428 | 1.94579  | -2.37045 |
| H | 2.62291  | 3.3587   | -1.03757 |
| H | -0.77998 | 5.48256  | -2.54696 |
| H | 1.66146  | 5.27575  | -2.25664 |
| H | -4.47137 | -1.403   | -1.74686 |
| H | -5.74724 | 0.34271  | -2.95264 |
| H | -5.00152 | 2.69251  | -2.9151  |
| C | -3.28385 | 4.67459  | -2.61074 |
| H | -2.96836 | 4.33346  | -3.60233 |
| H | -4.37661 | 4.72496  | -2.59347 |
| H | -2.92043 | 5.69591  | -2.46342 |
| C | -3.24271 | 4.29884  | -0.12796 |
| H | -4.33736 | 4.3327   | -0.09032 |
| H | -2.88976 | 3.66827  | 0.69378  |
| H | -2.85555 | 5.3119   | 0.02872  |
| O | -1.47176 | 1.62022  | -0.25469 |
| P | 1.33966  | 0.94295  | 0.27286  |
| P | -1.86945 | -1.24089 | -0.17961 |
| C | -2.58028 | -2.85329 | -0.68576 |
| C | -3.71836 | -3.40719 | -0.08058 |
| C | -1.94993 | -3.5475  | -1.72782 |
| C | -4.22127 | -4.63125 | -0.5199  |
| H | -4.20474 | -2.88112 | 0.73522  |
| C | -2.45706 | -4.77036 | -2.16867 |
| H | -1.05253 | -3.13461 | -2.17986 |
| C | -3.59272 | -5.31285 | -1.5656  |
| H | -5.10205 | -5.05479 | -0.04509 |
| H | -1.95708 | -5.30367 | -2.97206 |

|    |          |          |          |
|----|----------|----------|----------|
| H  | -3.98337 | -6.26902 | -1.90255 |
| C  | -2.30865 | -1.14142 | 1.6002   |
| C  | -1.74103 | -2.10192 | 2.45446  |
| C  | -3.11531 | -0.13581 | 2.14227  |
| C  | -1.99687 | -2.06554 | 3.82257  |
| H  | -1.09598 | -2.87511 | 2.04516  |
| C  | -3.3535  | -0.09086 | 3.51777  |
| H  | -3.5638  | 0.61111  | 1.49563  |
| C  | -2.80107 | -1.05592 | 4.35916  |
| H  | -1.55704 | -2.818   | 4.4713   |
| H  | -3.97658 | 0.69882  | 3.92857  |
| H  | -2.99121 | -1.02067 | 5.42826  |
| C  | 3.1539   | 1.20444  | 0.21534  |
| C  | 3.91548  | 1.44066  | 1.36529  |
| C  | 3.80081  | 1.11133  | -1.02798 |
| C  | 5.29998  | 1.60036  | 1.27066  |
| H  | 3.42945  | 1.5023   | 2.33291  |
| C  | 5.177    | 1.29572  | -1.12225 |
| H  | 3.22306  | 0.89298  | -1.92098 |
| C  | 5.93133  | 1.53966  | 0.02872  |
| H  | 5.88153  | 1.78051  | 2.17065  |
| H  | 5.66353  | 1.22361  | -2.08985 |
| H  | 7.00752  | 1.66999  | -0.04332 |
| C  | 0.87668  | 1.347    | 2.00407  |
| C  | 0.63016  | 2.66172  | 2.4231   |
| C  | 0.76432  | 0.29624  | 2.92579  |
| C  | 0.26859  | 2.92065  | 3.745    |
| H  | 0.71614  | 3.48174  | 1.71741  |
| C  | 0.41206  | 0.56175  | 4.2488   |
| H  | 0.95468  | -0.72249 | 2.60496  |
| C  | 0.15822  | 1.87113  | 4.65944  |
| H  | 0.07268  | 3.9422   | 4.0596   |
| H  | 0.31949  | -0.25984 | 4.9519   |
| H  | -0.1276  | 2.07374  | 5.68803  |
| Pd | 0.57197  | -1.15329 | -0.24925 |
| C  | 3.25848  | -2.12198 | -2.07035 |
| C  | 3.4364   | -2.14999 | -0.68111 |
| C  | 4.72534  | -2.07343 | -0.14356 |
| C  | 5.83029  | -1.98074 | -0.9884  |
| C  | 5.65375  | -1.96021 | -2.3722  |
| C  | 4.36459  | -2.02816 | -2.91065 |
| H  | 2.2564   | -2.17497 | -2.48151 |
| H  | 4.84513  | -2.08271 | 0.93394  |
| H  | 6.82818  | -1.9171  | -0.5639  |
| H  | 6.51497  | -1.88857 | -3.03104 |
| H  | 4.22297  | -2.01367 | -3.9879  |
| C  | 2.29433  | -2.22142 | 0.27806  |
| O  | 2.38433  | -2.37644 | 1.48077  |
| F  | 1.23555  | -3.28168 | -0.43791 |

### Int1

|   |          |          |          |
|---|----------|----------|----------|
| C | -1.15097 | -3.40618 | -1.60722 |
| C | -0.43892 | -2.42681 | -0.90144 |
| C | 0.95508  | -2.47479 | -0.96904 |
| C | 1.66918  | -3.43091 | -1.69564 |
| C | 0.92495  | -4.37413 | -2.40931 |
| C | -0.47089 | -4.36124 | -2.3636  |

|   |          |          |          |
|---|----------|----------|----------|
| C | 3.19727  | -3.40034 | -1.58248 |
| C | 3.61152  | -1.92634 | -1.55917 |
| C | 2.7804   | -1.03819 | -0.8718  |
| C | 3.00316  | 0.33695  | -0.79333 |
| C | 4.17408  | 0.8332   | -1.38508 |
| C | 5.04464  | -0.02867 | -2.05038 |
| C | 4.75861  | -1.39301 | -2.15199 |
| H | -2.23329 | -3.42067 | -1.56853 |
| H | 1.43111  | -5.13291 | -2.99603 |
| H | -1.0342  | -5.10833 | -2.9146  |
| H | 4.38621  | 1.89549  | -1.34539 |
| H | 5.94541  | 0.36683  | -2.51026 |
| H | 5.43583  | -2.03907 | -2.69985 |
| C | 3.87848  | -4.17273 | -2.71743 |
| H | 3.63312  | -3.75311 | -3.69866 |
| H | 4.96565  | -4.15631 | -2.59593 |
| H | 3.57613  | -5.22414 | -2.70454 |
| C | 3.59009  | -4.04376 | -0.22529 |
| H | 4.67616  | -4.00056 | -0.08644 |
| H | 3.11592  | -3.52463 | 0.61306  |
| H | 3.276    | -5.0932  | -0.19932 |
| O | 1.63761  | -1.51254 | -0.25832 |
| P | -1.20594 | -1.15074 | 0.18542  |
| P | 1.68121  | 1.39042  | -0.06484 |
| C | 2.15545  | 3.03879  | -0.6994  |
| C | 3.06922  | 3.87147  | -0.04281 |
| C | 1.60013  | 3.44954  | -1.91862 |
| C | 3.42922  | 5.09755  | -0.60506 |
| H | 3.49635  | 3.56399  | 0.90649  |
| C | 1.96586  | 4.6702   | -2.48161 |
| H | 0.86673  | 2.81747  | -2.41119 |
| C | 2.88108  | 5.49667  | -1.82507 |
| H | 4.1365   | 5.74047  | -0.08829 |
| H | 1.52497  | 4.98448  | -3.42343 |
| H | 3.15932  | 6.45291  | -2.25942 |
| C | 2.07353  | 1.44985  | 1.72455  |
| C | 1.30863  | 2.3215   | 2.52075  |
| C | 3.01663  | 0.60997  | 2.32576  |
| C | 1.50287  | 2.35252  | 3.89999  |
| H | 0.56354  | 2.95633  | 2.04793  |
| C | 3.19693  | 0.63783  | 3.71031  |
| H | 3.60909  | -0.06653 | 1.71818  |
| C | 2.44417  | 1.50893  | 4.49834  |
| H | 0.91052  | 3.02986  | 4.50887  |
| H | 3.92798  | -0.02112 | 4.17067  |
| H | 2.58833  | 1.5307   | 5.57518  |
| C | -2.98474 | -1.56681 | 0.04188  |
| C | -3.72932 | -2.05328 | 1.12162  |
| C | -3.63061 | -1.30629 | -1.17744 |
| C | -5.10056 | -2.27634 | 0.9822   |
| H | -3.24474 | -2.24523 | 2.07252  |
| C | -4.99543 | -1.54439 | -1.31824 |
| H | -3.06646 | -0.90025 | -2.01148 |
| C | -5.73458 | -2.02591 | -0.23515 |
| H | -5.6722  | -2.645   | 1.82923  |
| H | -5.48397 | -1.32798 | -2.26342 |
| H | -6.8024  | -2.1968  | -0.33846 |

|    |          |          |          |
|----|----------|----------|----------|
| C  | -0.70022 | -1.72977 | 1.84992  |
| C  | -0.49345 | -3.09038 | 2.12141  |
| C  | -0.49329 | -0.7832  | 2.86169  |
| C  | -0.0797  | -3.49505 | 3.38958  |
| H  | -0.64939 | -3.83039 | 1.34246  |
| C  | -0.07945 | -1.19267 | 4.1293   |
| H  | -0.65027 | 0.26836  | 2.65336  |
| C  | 0.13117  | -2.54624 | 4.39366  |
| H  | 0.08227  | -4.55011 | 3.59258  |
| H  | 0.09196  | -0.44794 | 4.89959  |
| H  | 0.46156  | -2.86356 | 5.37898  |
| Pd | -0.78587 | 1.10352  | 0.02478  |
| C  | -3.29224 | 2.03585  | -1.78528 |
| C  | -3.68822 | 1.79401  | -0.46493 |
| C  | -5.04709 | 1.84182  | -0.12542 |
| C  | -6.00053 | 2.11569  | -1.10155 |
| C  | -5.60155 | 2.35361  | -2.42069 |
| C  | -4.24658 | 2.32008  | -2.76017 |
| H  | -2.23537 | 1.999    | -2.03409 |
| H  | -5.33439 | 1.64086  | 0.90116  |
| H  | -7.05473 | 2.13991  | -0.83927 |
| H  | -6.34652 | 2.56721  | -3.18258 |
| H  | -3.93599 | 2.51535  | -3.78282 |
| C  | -2.69639 | 1.40892  | 0.58693  |
| O  | -2.99016 | 1.35546  | 1.76311  |
| F  | -0.72457 | 3.13698  | 0.14192  |

## Int1

|   |         |          |          |
|---|---------|----------|----------|
| C | 3.13887 | -2.28189 | -1.83454 |
| C | 2.53939 | -1.49939 | -0.84027 |
| C | 3.07317 | -0.22872 | -0.60117 |
| C | 4.17821 | 0.28959  | -1.27637 |
| C | 4.7516  | -0.51751 | -2.2649  |
| C | 4.23522 | -1.78612 | -2.5419  |
| C | 4.67509 | 1.67149  | -0.84269 |
| C | 3.43547 | 2.52285  | -0.5432  |
| C | 2.33938 | 1.8911   | 0.0551   |
| C | 1.14507 | 2.53987  | 0.38134  |
| C | 1.09108 | 3.92316  | 0.14997  |
| C | 2.17062 | 4.5901   | -0.42519 |
| C | 3.32673 | 3.89418  | -0.78619 |
| H | 2.7374  | -3.26158 | -2.06748 |
| H | 5.60517 | -0.15801 | -2.82831 |
| H | 4.69098 | -2.39324 | -3.31789 |
| H | 0.18934 | 4.47079  | 0.39584  |
| H | 2.10762 | 5.65914  | -0.60469 |
| H | 4.14706 | 4.42882  | -1.25195 |
| C | 5.57697 | 2.31653  | -1.90137 |
| H | 5.05173 | 2.45676  | -2.85214 |
| H | 5.93885 | 3.29033  | -1.55908 |
| H | 6.46153 | 1.69865  | -2.08239 |
| C | 5.48089 | 1.50429  | 0.47335  |
| H | 5.82369 | 2.48082  | 0.83262  |
| H | 4.87008 | 1.04732  | 1.25786  |
| H | 6.3562  | 0.86709  | 0.30433  |
| O | 2.41047 | 0.54029  | 0.33076  |
| P | 0.98483 | -1.90482 | 0.03075  |



|    |          |          |          |
|----|----------|----------|----------|
| P  | -0.32741 | 1.56879  | 0.94571  |
| C  | -1.65222 | 2.79044  | 0.5995   |
| C  | -2.31069 | 3.53126  | 1.58618  |
| C  | -1.98959 | 2.98783  | -0.74923 |
| C  | -3.30225 | 4.44739  | 1.2293   |
| H  | -2.05793 | 3.39444  | 2.63145  |
| C  | -2.97112 | 3.90915  | -1.1017  |
| H  | -1.49172 | 2.41477  | -1.52325 |
| C  | -3.63555 | 4.63682  | -0.11173 |
| H  | -3.8152  | 5.01028  | 2.00412  |
| H  | -3.22979 | 4.0403   | -2.1483  |
| H  | -4.41396 | 5.34365  | -0.38478 |
| C  | -0.165   | 1.51736  | 2.76695  |
| C  | -1.26779 | 1.08548  | 3.52401  |
| C  | 1.03177  | 1.84218  | 3.41644  |
| C  | -1.17583 | 1.01997  | 4.91302  |
| H  | -2.18737 | 0.80686  | 3.02022  |
| C  | 1.12395  | 1.74887  | 4.8058   |
| H  | 1.89155  | 2.17099  | 2.84244  |
| C  | 0.01917  | 1.3487   | 5.55769  |
| H  | -2.03884 | 0.70131  | 5.49128  |
| H  | 2.05918  | 1.99815  | 5.29937  |
| H  | 0.08982  | 1.28799  | 6.64022  |
| C  | 0.73823  | -3.69879 | -0.21758 |
| C  | 1.79191  | -4.5971  | 0.02137  |
| C  | -0.53315 | -4.1908  | -0.53185 |
| C  | 1.57874  | -5.96871 | -0.0846  |
| H  | 2.77229  | -4.22376 | 0.30119  |
| C  | -0.7431  | -5.56794 | -0.62919 |
| H  | -1.35109 | -3.50485 | -0.70069 |
| C  | 0.30977  | -6.45571 | -0.41351 |
| H  | 2.39802  | -6.65807 | 0.09872  |
| H  | -1.73264 | -5.94118 | -0.87601 |
| H  | 0.14393  | -7.52642 | -0.49269 |
| C  | 1.38406  | -1.83396 | 1.81455  |
| C  | 2.70031  | -1.86058 | 2.29136  |
| C  | 0.31565  | -1.82351 | 2.72002  |
| C  | 2.94348  | -1.87437 | 3.66413  |
| H  | 3.53358  | -1.86675 | 1.59576  |
| C  | 0.56435  | -1.85221 | 4.09104  |
| H  | -0.70573 | -1.78158 | 2.35194  |
| C  | 1.87655  | -1.8717  | 4.56479  |
| H  | 3.96669  | -1.88689 | 4.02933  |
| H  | -0.26772 | -1.8323  | 4.78629  |
| H  | 2.06729  | -1.87788 | 5.63405  |
| Pd | -0.69633 | -0.4771  | -0.52401 |
| C  | 0.53224  | 0.77998  | -3.04981 |
| C  | -0.63151 | 0.00848  | -3.195   |
| C  | -1.68367 | 0.46568  | -4.00177 |
| C  | -1.56576 | 1.69027  | -4.65567 |
| C  | -0.40474 | 2.45696  | -4.51413 |
| C  | 0.64784  | 1.9968   | -3.72    |
| H  | 1.34058  | 0.4225   | -2.42357 |
| H  | -2.59129 | -0.12248 | -4.07914 |
| H  | -2.38497 | 2.05144  | -5.27047 |
| H  | -0.32321 | 3.41423  | -5.02099 |
| H  | 1.54992  | 2.5899   | -3.60469 |

|   |          |          |          |
|---|----------|----------|----------|
| C | -0.84319 | -1.23972 | -2.38019 |
| O | -1.20802 | -2.30124 | -2.80517 |
| S | -3.90249 | 0.01221  | -0.02491 |
| O | -5.15028 | 0.70299  | -0.36244 |
| O | -3.41475 | 0.10517  | 1.36448  |
| C | -4.29265 | -1.79618 | -0.22607 |
| F | -4.48343 | -2.10281 | -1.51604 |
| F | -5.39459 | -2.12153 | 0.46053  |
| F | -3.27592 | -2.55645 | 0.23632  |
| O | -2.8241  | 0.2073   | -1.0671  |

## Ts5

|   |          |          |          |
|---|----------|----------|----------|
| C | 3.28633  | 1.97633  | 0.57827  |
| C | 2.14362  | 1.17387  | 0.70567  |
| C | 1.01676  | 1.7598   | 1.29569  |
| C | 0.97225  | 3.08096  | 1.74884  |
| C | 2.12825  | 3.85013  | 1.58989  |
| C | 3.27566  | 3.30087  | 1.01421  |
| C | -0.31718 | 3.5639   | 2.42047  |
| C | -1.49056 | 2.9111   | 1.68496  |
| C | -1.32491 | 1.59872  | 1.24062  |
| C | -2.3297  | 0.85775  | 0.60819  |
| C | -3.57134 | 1.47892  | 0.42596  |
| C | -3.77035 | 2.7924   | 0.85251  |
| C | -2.73957 | 3.50323  | 1.47061  |
| H | 4.17846  | 1.57063  | 0.11571  |
| H | 2.14047  | 4.88357  | 1.91745  |
| H | 4.1676   | 3.91064  | 0.90368  |
| H | -4.37292 | 0.94029  | -0.0668  |
| H | -4.73535 | 3.26728  | 0.70124  |
| H | -2.91661 | 4.52412  | 1.79053  |
| C | -0.42366 | 5.09321  | 2.43094  |
| H | -0.41836 | 5.50558  | 1.41662  |
| H | -1.34318 | 5.41216  | 2.93019  |
| H | 0.4059   | 5.53586  | 2.98991  |
| C | -0.32189 | 3.04869  | 3.88454  |
| H | -1.24391 | 3.35452  | 4.39163  |
| H | -0.26029 | 1.9566   | 3.91979  |
| H | 0.53288  | 3.4585   | 4.43424  |
| O | -0.10812 | 0.9656   | 1.39739  |
| P | 1.95485  | -0.49259 | -0.05872 |
| P | -1.85103 | -0.7727  | -0.08035 |
| C | -3.40534 | -1.38347 | -0.84297 |
| C | -4.52778 | -1.72329 | -0.07243 |
| C | -3.46453 | -1.51623 | -2.23637 |
| C | -5.69698 | -2.16402 | -0.68997 |
| H | -4.48179 | -1.64829 | 1.01001  |
| C | -4.63612 | -1.95916 | -2.85341 |
| H | -2.58091 | -1.29627 | -2.82923 |
| C | -5.75373 | -2.27869 | -2.08209 |
| H | -6.56178 | -2.42477 | -0.08601 |
| H | -4.6685  | -2.06614 | -3.93399 |
| H | -6.66427 | -2.6277  | -2.56127 |
| C | -1.66619 | -1.85122 | 1.3826   |
| C | -1.05724 | -3.09714 | 1.16974  |
| C | -2.12994 | -1.50686 | 2.65812  |
| C | -0.94389 | -3.99793 | 2.22698  |

|    |          |          |          |
|----|----------|----------|----------|
| H  | -0.66923 | -3.33448 | 0.18185  |
| C  | -1.99926 | -2.40948 | 3.71426  |
| H  | -2.5936  | -0.53936 | 2.82564  |
| C  | -1.41287 | -3.65744 | 3.49772  |
| H  | -0.46865 | -4.95976 | 2.06205  |
| H  | -2.35833 | -2.13869 | 4.70374  |
| H  | -1.31184 | -4.36021 | 4.32035  |
| C  | 3.58021  | -0.73887 | -0.88361 |
| C  | 4.76545  | -0.92722 | -0.15324 |
| C  | 3.63575  | -0.74159 | -2.28296 |
| C  | 5.98143  | -1.09284 | -0.81296 |
| H  | 4.73065  | -0.94778 | 0.93179  |
| C  | 4.85508  | -0.9071  | -2.94381 |
| H  | 2.71786  | -0.63974 | -2.85306 |
| C  | 6.02851  | -1.07932 | -2.21044 |
| H  | 6.89239  | -1.23703 | -0.2385  |
| H  | 4.88178  | -0.91453 | -4.02977 |
| H  | 6.97685  | -1.21384 | -2.72327 |
| C  | 2.08967  | -1.67188 | 1.34019  |
| C  | 1.86985  | -1.31423 | 2.6752   |
| C  | 2.39033  | -3.00829 | 1.02827  |
| C  | 1.96798  | -2.27288 | 3.68468  |
| H  | 1.62972  | -0.28903 | 2.93339  |
| C  | 2.50518  | -3.95708 | 2.04093  |
| H  | 2.53406  | -3.30115 | -0.00734 |
| C  | 2.29575  | -3.59202 | 3.37298  |
| H  | 1.79156  | -1.9837  | 4.717    |
| H  | 2.74876  | -4.98534 | 1.78788  |
| H  | 2.37809  | -4.33455 | 4.16188  |
| Pd | -0.02103 | -0.61394 | -1.73569 |
| C  | 0.91912  | 2.27759  | -2.12727 |
| C  | -0.17134 | 1.43376  | -2.39801 |
| C  | -1.47313 | 1.96311  | -2.42493 |
| C  | -1.68222 | 3.30668  | -2.12589 |
| C  | -0.59642 | 4.13327  | -1.82503 |
| C  | 0.70415  | 3.62149  | -1.83432 |
| H  | 1.92613  | 1.87593  | -2.13549 |
| H  | -2.31162 | 1.31629  | -2.6596  |
| H  | -2.69185 | 3.70484  | -2.11328 |
| H  | -0.7644  | 5.18025  | -1.58871 |
| H  | 1.54804  | 4.26139  | -1.59714 |
| C  | 0.18782  | 0.04545  | -3.46942 |
| O  | 0.33758  | 0.06981  | -4.63436 |
| F  | 0.07249  | -2.66849 | -1.86035 |

### Ts5A

|   |         |          |          |
|---|---------|----------|----------|
| C | 1.62759 | -3.5567  | -1.81506 |
| C | 1.48675 | -2.51481 | -0.88904 |
| C | 2.60257 | -1.70051 | -0.6637  |
| C | 3.82235 | -1.848   | -1.32682 |
| C | 3.92081 | -2.89339 | -2.25058 |
| C | 2.83774 | -3.74285 | -2.48379 |
| C | 4.94945 | -0.87369 | -0.96524 |
| C | 4.30272 | 0.49558  | -0.72826 |
| C | 3.067   | 0.51837  | -0.08026 |
| C | 2.37133 | 1.68857  | 0.24283  |
| C | 2.96596 | 2.90689  | -0.10511 |

|   |          |          |          |
|---|----------|----------|----------|
| C | 4.20167  | 2.92329  | -0.75436 |
| C | 4.86212  | 1.73262  | -1.0668  |
| H | 0.78474  | -4.20114 | -2.03411 |
| H | 4.84484  | -3.04939 | -2.79595 |
| H | 2.93282  | -4.54977 | -3.20396 |
| H | 2.449    | 3.83649  | 0.10087  |
| H | 4.65159  | 3.87337  | -1.02654 |
| H | 5.8178   | 1.77374  | -1.57758 |
| C | 6.03277  | -0.81852 | -2.04823 |
| H | 5.6277   | -0.49284 | -3.01207 |
| H | 6.83287  | -0.13128 | -1.75801 |
| H | 6.4959   | -1.80049 | -2.18148 |
| C | 5.59143  | -1.34212 | 0.36775  |
| H | 6.38468  | -0.6496  | 0.67053  |
| H | 4.85057  | -1.3846  | 1.17185  |
| H | 6.02596  | -2.34071 | 0.24837  |
| O | 2.4423   | -0.67099 | 0.24428  |
| P | -0.12458 | -2.01241 | -0.15236 |
| P | 0.66645  | 1.46535  | 0.88653  |
| C | 0.04226  | 3.15747  | 1.19034  |
| C | 0.75226  | 4.05149  | 2.00884  |
| C | -1.19174 | 3.54464  | 0.65536  |
| C | 0.25386  | 5.3298   | 2.24781  |
| H | 1.68721  | 3.74172  | 2.4663   |
| C | -1.69092 | 4.82464  | 0.90305  |
| H | -1.77505 | 2.83599  | 0.08465  |
| C | -0.96673 | 5.72036  | 1.68846  |
| H | 0.81022  | 6.01724  | 2.87884  |
| H | -2.6531  | 5.11205  | 0.48919  |
| H | -1.35758 | 6.71562  | 1.88107  |
| C | 0.90522  | 0.84849  | 2.59281  |
| C | -0.24511 | 0.53501  | 3.3317   |
| C | 2.16577  | 0.76054  | 3.19563  |
| C | -0.12743 | 0.1559   | 4.66689  |
| H | -1.21969 | 0.58929  | 2.85648  |
| C | 2.27543  | 0.37259  | 4.53143  |
| H | 3.06004  | 1.00469  | 2.63167  |
| C | 1.12969  | 0.07606  | 5.26985  |
| H | -1.02109 | -0.08816 | 5.23283  |
| H | 3.2565   | 0.30826  | 4.99438  |
| H | 1.21536  | -0.22342 | 6.31075  |
| C | -1.31354 | -3.23652 | -0.80438 |
| C | -1.20263 | -4.58652 | -0.4296  |
| C | -2.35158 | -2.84171 | -1.65274 |
| C | -2.10033 | -5.52716 | -0.92725 |
| H | -0.41822 | -4.89668 | 0.2541   |
| C | -3.25276 | -3.78624 | -2.14616 |
| H | -2.4815  | -1.79719 | -1.89923 |
| C | -3.12552 | -5.12765 | -1.79008 |
| H | -2.00698 | -6.56921 | -0.63498 |
| H | -4.06307 | -3.46524 | -2.79379 |
| H | -3.8308  | -5.86112 | -2.17057 |
| C | -0.06106 | -2.45811 | 1.61727  |
| C | 1.13102  | -2.75066 | 2.28877  |
| C | -1.28764 | -2.54357 | 2.29642  |
| C | 1.09587  | -3.13903 | 3.62829  |
| H | 2.08224  | -2.69116 | 1.7734   |

|    |          |          |          |
|----|----------|----------|----------|
| C  | -1.31268 | -2.94224 | 3.6304   |
| H  | -2.21363 | -2.30545 | 1.78134  |
| C  | -0.12336 | -3.24223 | 4.29821  |
| H  | 2.02428  | -3.36218 | 4.14609  |
| H  | -2.26514 | -3.01199 | 4.14791  |
| H  | -0.1456  | -3.54888 | 5.34025  |
| Pd | -0.4492  | 0.20702  | -0.8849  |
| C  | 0.89111  | 2.28421  | -2.69945 |
| C  | -0.3927  | 1.81909  | -2.38677 |
| C  | -1.51191 | 2.63639  | -2.58098 |
| C  | -1.3366  | 3.94206  | -3.03978 |
| C  | -0.05414 | 4.42187  | -3.31678 |
| C  | 1.05825  | 3.59263  | -3.15213 |
| H  | 1.75244  | 1.63671  | -2.5741  |
| H  | -2.50494 | 2.26571  | -2.36238 |
| H  | -2.20177 | 4.58451  | -3.17672 |
| H  | 0.07755  | 5.44058  | -3.6703  |
| H  | 2.0556   | 3.96204  | -3.37241 |
| C  | -0.67263 | -0.05318 | -2.73098 |
| O  | -0.73567 | -0.49588 | -3.8071  |
| S  | -3.77723 | 0.08619  | 0.82072  |
| O  | -4.6304  | 0.71858  | 1.83773  |
| O  | -3.88966 | -1.37859 | 0.66599  |
| C  | -4.44905 | 0.73562  | -0.78502 |
| F  | -4.34028 | 2.07894  | -0.84148 |
| F  | -5.73542 | 0.41272  | -0.94856 |
| F  | -3.76197 | 0.23604  | -1.84434 |
| O  | -2.37279 | 0.59996  | 0.79131  |

## Ts5B

|   |         |         |          |
|---|---------|---------|----------|
| C | 2.59332 | 2.34007 | -2.89222 |
| C | 2.5344  | 1.55071 | -1.73982 |
| C | 2.89339 | 2.14089 | -0.52307 |
| C | 3.25784 | 3.47618 | -0.379   |
| C | 3.3036  | 4.23974 | -1.55157 |
| C | 2.99016 | 3.67489 | -2.79056 |
| C | 3.61663 | 3.96529 | 1.02943  |
| C | 2.72499 | 3.21175 | 2.02827  |
| C | 2.40687 | 1.88143 | 1.75139  |
| C | 1.62644 | 1.06783 | 2.57953  |
| C | 1.17103 | 1.62522 | 3.78264  |
| C | 1.4814  | 2.9469  | 4.10135  |
| C | 2.23862 | 3.73525 | 3.23094  |
| H | 2.30849 | 1.92484 | -3.85171 |
| H | 3.58386 | 5.28614 | -1.5041  |
| H | 3.03327 | 4.28896 | -3.68472 |
| H | 0.55361 | 1.0339  | 4.44887  |
| H | 1.11828 | 3.37237 | 5.03162  |
| H | 2.44912 | 4.7647  | 3.49812  |
| C | 3.45949 | 5.48573 | 1.15587  |
| H | 2.42921 | 5.80217 | 0.96248  |
| H | 3.74364 | 5.82373 | 2.15638  |
| H | 4.11936 | 6.00147 | 0.45216  |
| C | 5.09274 | 3.57991 | 1.3127   |
| H | 5.37607 | 3.88316 | 2.32642  |
| H | 5.24438 | 2.4993  | 1.22504  |
| H | 5.75898 | 4.07799 | 0.59956  |

|    |          |          |          |
|----|----------|----------|----------|
| O  | 2.84982  | 1.30937  | 0.57433  |
| P  | 1.90409  | -0.15405 | -1.6016  |
| P  | 1.05203  | -0.56832 | 1.95955  |
| C  | -0.19003 | -1.08188 | 3.18848  |
| C  | 0.17368  | -1.74028 | 4.37541  |
| C  | -1.53525 | -0.78033 | 2.94766  |
| C  | -0.80848 | -2.09532 | 5.2968   |
| H  | 1.21341  | -1.97882 | 4.57289  |
| C  | -2.51658 | -1.14559 | 3.86752  |
| H  | -1.84017 | -0.26863 | 2.04476  |
| C  | -2.15231 | -1.80428 | 5.04084  |
| H  | -0.52572 | -2.6089  | 6.21153  |
| H  | -3.55426 | -0.93902 | 3.63545  |
| H  | -2.9154  | -2.10048 | 5.75496  |
| C  | 2.41853  | -1.75234 | 2.17627  |
| C  | 2.10344  | -3.12182 | 2.15251  |
| C  | 3.74256  | -1.34559 | 2.37584  |
| C  | 3.10455  | -4.06667 | 2.36133  |
| H  | 1.08008  | -3.44488 | 1.99098  |
| C  | 4.74103  | -2.29967 | 2.57057  |
| H  | 3.99473  | -0.29116 | 2.39285  |
| C  | 4.4235   | -3.65836 | 2.57317  |
| H  | 2.8517   | -5.12287 | 2.35531  |
| H  | 5.767    | -1.97841 | 2.72448  |
| H  | 5.20289  | -4.39791 | 2.73353  |
| C  | 1.42656  | -0.76232 | -3.2502  |
| C  | 2.33747  | -0.71807 | -4.31746 |
| C  | 0.17552  | -1.36728 | -3.4275  |
| C  | 1.97513  | -1.2353  | -5.55998 |
| H  | 3.32678  | -0.29365 | -4.175   |
| C  | -0.17484 | -1.89831 | -4.66806 |
| H  | -0.51564 | -1.43377 | -2.59733 |
| C  | 0.71942  | -1.82333 | -5.73667 |
| H  | 2.67801  | -1.19138 | -6.38675 |
| H  | -1.14302 | -2.37393 | -4.78994 |
| H  | 0.44511  | -2.23346 | -6.70415 |
| C  | 3.364    | -1.16379 | -1.19228 |
| C  | 4.65163  | -0.60768 | -1.15543 |
| C  | 3.19149  | -2.54435 | -1.01032 |
| C  | 5.75822  | -1.43161 | -0.95922 |
| H  | 4.79618  | 0.45687  | -1.29982 |
| C  | 4.3045   | -3.35764 | -0.81435 |
| H  | 2.19667  | -2.97352 | -1.01624 |
| C  | 5.5869   | -2.80639 | -0.79123 |
| H  | 6.75394  | -0.99778 | -0.9416  |
| H  | 4.16514  | -4.42373 | -0.66818 |
| H  | 6.45062  | -3.44658 | -0.63656 |
| Pd | 0.02254  | -0.02597 | -0.19299 |
| C  | -0.78998 | 1.73964  | -2.75185 |
| C  | -0.91443 | 1.39283  | -1.40001 |
| C  | -0.98235 | 2.39649  | -0.40898 |
| C  | -0.72406 | 3.72816  | -0.76079 |
| C  | -0.52398 | 4.06244  | -2.0966  |
| C  | -0.57949 | 3.07128  | -3.09002 |
| H  | -0.81231 | 0.98293  | -3.52612 |
| H  | -1.28863 | 2.16511  | 0.60801  |
| H  | -0.75183 | 4.49543  | 0.00687  |

|    |          |          |          |
|----|----------|----------|----------|
| H  | -0.35618 | 5.09776  | -2.3776  |
| H  | -0.43705 | 3.34109  | -4.1329  |
| C  | -3.02634 | -0.01774 | -1.72423 |
| O  | -3.28724 | 0.01267  | -2.83957 |
| S  | -1.1508  | -3.18523 | -0.10658 |
| O  | 0.12931  | -3.35825 | -0.81359 |
| O  | -1.60108 | -1.70919 | -0.18458 |
| C  | -2.40512 | -3.97464 | -1.23992 |
| F  | -2.01078 | -5.21619 | -1.5302  |
| F  | -2.47605 | -3.26375 | -2.38329 |
| F  | -3.6131  | -4.01099 | -0.68659 |
| O  | -1.29565 | -3.80223 | 1.20964  |
| Cu | -3.58431 | -0.81109 | -0.05678 |
| O  | -5.14076 | 0.6516   | -0.05295 |
| S  | -4.65288 | 1.72694  | 0.8922   |
| O  | -3.26346 | 1.45782  | 1.34079  |
| O  | -5.61859 | 2.16417  | 1.90026  |
| C  | -4.47603 | 3.17953  | -0.25848 |
| F  | -3.83244 | 2.81723  | -1.38443 |
| F  | -3.76826 | 4.15573  | 0.33135  |
| F  | -5.67386 | 3.66281  | -0.59907 |
| F  | -4.18024 | -1.81951 | 1.32094  |

## Int2

|   |          |          |          |
|---|----------|----------|----------|
| C | 3.35303  | 1.92141  | 0.64048  |
| C | 2.16217  | 1.18877  | 0.72778  |
| C | 1.03074  | 1.85401  | 1.21693  |
| C | 1.01862  | 3.20326  | 1.57648  |
| C | 2.2225   | 3.90346  | 1.45365  |
| C | 3.38036  | 3.26686  | 1.00373  |
| C | -0.28172 | 3.80068  | 2.1249   |
| C | -1.45548 | 3.10404  | 1.43025  |
| C | -1.31681 | 1.75853  | 1.09286  |
| C | -2.33126 | 0.99239  | 0.50895  |
| C | -3.56172 | 1.61563  | 0.275    |
| C | -3.73658 | 2.96137  | 0.59763  |
| C | -2.69316 | 3.69858  | 1.16063  |
| H | 4.24958  | 1.44815  | 0.25764  |
| H | 2.26475  | 4.95512  | 1.71315  |
| H | 4.30713  | 3.8274   | 0.92516  |
| H | -4.36933 | 1.05666  | -0.18413 |
| H | -4.69097 | 3.44224  | 0.40455  |
| H | -2.85232 | 4.74516  | 1.39471  |
| C | -0.33197 | 5.32238  | 1.93205  |
| H | -0.27537 | 5.59165  | 0.87234  |
| H | -1.25543 | 5.7358   | 2.34753  |
| H | 0.49172  | 5.81024  | 2.46107  |
| C | -0.36092 | 3.47553  | 3.63989  |
| H | -1.2936  | 3.86467  | 4.0638   |
| H | -0.33268 | 2.39493  | 3.81353  |
| H | 0.48262  | 3.92993  | 4.17176  |
| O | -0.12216 | 1.1049   | 1.30551  |
| P | 1.93442  | -0.48425 | -0.00019 |
| P | -1.86577 | -0.6812  | -0.07212 |
| C | -3.41376 | -1.30667 | -0.83975 |
| C | -4.54165 | -1.63135 | -0.07016 |
| C | -3.46881 | -1.45827 | -2.23077 |

|    |          |          |          |
|----|----------|----------|----------|
| C  | -5.70832 | -2.07966 | -0.68717 |
| H  | -4.50198 | -1.53983 | 1.011    |
| C  | -4.638   | -1.90642 | -2.84786 |
| H  | -2.5849  | -1.24301 | -2.82339 |
| C  | -5.75941 | -2.21442 | -2.07747 |
| H  | -6.57617 | -2.3298  | -0.08317 |
| H  | -4.66632 | -2.02503 | -3.92735 |
| H  | -6.66824 | -2.56872 | -2.55587 |
| C  | -1.76227 | -1.66492 | 1.46719  |
| C  | -1.22294 | -2.95632 | 1.37218  |
| C  | -2.25125 | -1.20037 | 2.69532  |
| C  | -1.20504 | -3.78009 | 2.49617  |
| H  | -0.79599 | -3.27918 | 0.4266   |
| C  | -2.21606 | -2.02768 | 3.81858  |
| H  | -2.66289 | -0.19905 | 2.77414  |
| C  | -1.7016  | -3.32099 | 3.71784  |
| H  | -0.78204 | -4.77696 | 2.42068  |
| H  | -2.59544 | -1.66245 | 4.76934  |
| H  | -1.67773 | -3.96612 | 4.59206  |
| C  | 3.57154  | -0.82807 | -0.76171 |
| C  | 4.70376  | -1.108   | 0.0206   |
| C  | 3.69722  | -0.79826 | -2.15587 |
| C  | 5.93779  | -1.3396  | -0.58411 |
| H  | 4.61479  | -1.15002 | 1.10164  |
| C  | 4.93417  | -1.02856 | -2.76081 |
| H  | 2.81869  | -0.61075 | -2.76509 |
| C  | 6.05554  | -1.29771 | -1.97634 |
| H  | 6.80719  | -1.55671 | 0.03024  |
| H  | 5.0161   | -1.00796 | -3.84382 |
| H  | 7.01738  | -1.48305 | -2.44624 |
| C  | 1.94082  | -1.64083 | 1.4175   |
| C  | 1.72856  | -1.22598 | 2.73698  |
| C  | 2.17238  | -2.99977 | 1.14832  |
| C  | 1.76778  | -2.1546  | 3.77775  |
| H  | 1.53979  | -0.18125 | 2.95708  |
| C  | 2.22884  | -3.91828 | 2.19334  |
| H  | 2.29864  | -3.33069 | 0.12367  |
| C  | 2.02953  | -3.49812 | 3.5106   |
| H  | 1.59733  | -1.82371 | 4.7983   |
| H  | 2.41769  | -4.96612 | 1.97678  |
| H  | 2.06727  | -4.21755 | 4.32393  |
| Pd | 0.07668  | -0.74109 | -1.64455 |
| C  | 1.08661  | 2.06428  | -2.10764 |
| C  | -0.05355 | 1.25405  | -2.0455  |
| C  | -1.30047 | 1.84418  | -2.28961 |
| C  | -1.41447 | 3.22197  | -2.4916  |
| C  | -0.27726 | 4.0307   | -2.48701 |
| C  | 0.9754   | 3.4434   | -2.30921 |
| H  | 2.07379  | 1.63547  | -1.98512 |
| H  | -2.1987  | 1.2374   | -2.30555 |
| H  | -2.39771 | 3.65808  | -2.64752 |
| H  | -0.36541 | 5.10353  | -2.63629 |
| H  | 1.87531  | 4.05297  | -2.32094 |
| C  | 0.14008  | -0.94343 | -3.56562 |
| O  | 0.17762  | -1.05254 | -4.70911 |
| F  | 0.20056  | -2.77789 | -1.33724 |



## Int2A

|   |          |          |          |
|---|----------|----------|----------|
| C | 1.66938  | -3.5044  | -1.82398 |
| C | 1.51163  | -2.47354 | -0.88748 |
| C | 2.62087  | -1.65462 | -0.64696 |
| C | 3.85357  | -1.79772 | -1.28755 |
| C | 3.9682   | -2.83411 | -2.21896 |
| C | 2.88841  | -3.68002 | -2.47904 |
| C | 4.97742  | -0.83308 | -0.8906  |
| C | 4.33324  | 0.53748  | -0.65714 |
| C | 3.08027  | 0.56071  | -0.04479 |
| C | 2.37646  | 1.73151  | 0.25542  |
| C | 2.98098  | 2.95054  | -0.07155 |
| C | 4.23881  | 2.96591  | -0.67595 |
| C | 4.9059   | 1.77482  | -0.97132 |
| H | 0.83397  | -4.15211 | -2.05993 |
| H | 4.90156  | -2.98609 | -2.74938 |
| H | 2.9947   | -4.47928 | -3.20616 |
| H | 2.45388  | 3.87976  | 0.10623  |
| H | 4.69679  | 3.91573  | -0.93431 |
| H | 5.87652  | 1.81573  | -1.45302 |
| C | 6.0865   | -0.77497 | -1.94682 |
| H | 5.70698  | -0.43688 | -2.9167  |
| H | 6.88391  | -0.09623 | -1.63051 |
| H | 6.54602  | -1.75889 | -2.07825 |
| C | 5.58445  | -1.31827 | 0.45288  |
| H | 6.37473  | -0.63385 | 0.78067  |
| H | 4.82461  | -1.36312 | 1.23906  |
| H | 6.01537  | -2.31853 | 0.33463  |
| O | 2.44288  | -0.62739 | 0.26002  |
| P | -0.1065  | -1.98955 | -0.14507 |
| P | 0.64934  | 1.50346  | 0.82363  |
| C | 0.01505  | 3.16579  | 1.24237  |
| C | 0.7862   | 4.02897  | 2.03873  |
| C | -1.2837  | 3.53836  | 0.87861  |
| C | 0.28324  | 5.27222  | 2.41389  |
| H | 1.77133  | 3.72436  | 2.37789  |
| C | -1.7861  | 4.78134  | 1.26625  |
| H | -1.90883 | 2.84577  | 0.3346   |
| C | -1.00233 | 5.65376  | 2.02009  |
| H | 0.88902  | 5.93712  | 3.02304  |
| H | -2.79718 | 5.05889  | 0.98312  |
| H | -1.39614 | 6.62169  | 2.31735  |
| C | 0.8156   | 0.78077  | 2.49888  |
| C | -0.35828 | 0.45803  | 3.19437  |
| C | 2.05723  | 0.6617   | 3.13604  |
| C | -0.2824  | 0.02919  | 4.51746  |
| H | -1.31882 | 0.54532  | 2.69793  |
| C | 2.12414  | 0.22901  | 4.4602   |
| H | 2.9704   | 0.91961  | 2.61098  |
| C | 0.95511  | -0.08535 | 5.15316  |
| H | -1.19474 | -0.22509 | 5.0477   |
| H | 3.09077  | 0.14148  | 4.94883  |
| H | 1.00732  | -0.42311 | 6.18439  |
| C | -1.2778  | -3.22086 | -0.82447 |
| C | -1.11559 | -4.5821  | -0.51179 |
| C | -2.35666 | -2.82671 | -1.62118 |
| C | -1.9946  | -5.53065 | -1.02663 |

|    |          |          |          |
|----|----------|----------|----------|
| H  | -0.30348 | -4.89488 | 0.1375   |
| C  | -3.23998 | -3.77936 | -2.1323  |
| H  | -2.54663 | -1.77864 | -1.80387 |
| C  | -3.05647 | -5.12996 | -1.84365 |
| H  | -1.85813 | -6.58049 | -0.78338 |
| H  | -4.0817  | -3.45688 | -2.73771 |
| H  | -3.74704 | -5.86997 | -2.23805 |
| C  | -0.05129 | -2.49736 | 1.61018  |
| C  | 1.14052  | -2.78512 | 2.28363  |
| C  | -1.28325 | -2.65323 | 2.26726  |
| C  | 1.10016  | -3.24464 | 3.60034  |
| H  | 2.09608  | -2.66772 | 1.7866   |
| C  | -1.31263 | -3.12047 | 3.5787   |
| H  | -2.20968 | -2.41487 | 1.75272  |
| C  | -0.12349 | -3.42058 | 4.24658  |
| H  | 2.02863  | -3.46643 | 4.1187   |
| H  | -2.26889 | -3.24506 | 4.07862  |
| H  | -0.14965 | -3.78361 | 5.27026  |
| Pd | -0.38544 | 0.28758  | -0.97559 |
| C  | 0.91846  | 2.52412  | -2.5485  |
| C  | -0.29862 | 2.08968  | -2.01582 |
| C  | -1.45823 | 2.83106  | -2.26021 |
| C  | -1.38537 | 4.03449  | -2.96712 |
| C  | -0.16057 | 4.49267  | -3.45637 |
| C  | 0.98956  | 3.72992  | -3.25414 |
| H  | 1.81989  | 1.93765  | -2.40872 |
| H  | -2.41842 | 2.48701  | -1.89706 |
| H  | -2.29149 | 4.61128  | -3.13451 |
| H  | -0.10672 | 5.42987  | -4.00356 |
| H  | 1.94687  | 4.06489  | -3.6459  |
| C  | -0.64918 | -0.34074 | -2.76816 |
| O  | -0.68549 | -0.6474  | -3.87024 |
| S  | -3.77099 | 0.066    | 0.75205  |
| O  | -4.61795 | 0.68059  | 1.78488  |
| O  | -3.83828 | -1.404   | 0.61741  |
| C  | -4.49793 | 0.67554  | -0.84447 |
| F  | -4.49658 | 2.02243  | -0.88508 |
| F  | -5.75565 | 0.25241  | -1.00582 |
| F  | -3.77674 | 0.24096  | -1.90849 |
| O  | -2.38476 | 0.62336  | 0.6807   |

## Ts6

|   |          |         |          |
|---|----------|---------|----------|
| C | 3.59303  | 1.64356 | -0.63948 |
| C | 2.44078  | 1.07237 | -0.09052 |
| C | 1.48988  | 1.93599 | 0.47521  |
| C | 1.67727  | 3.31501 | 0.57449  |
| C | 2.83948  | 3.85122 | 0.01015  |
| C | 3.78209  | 3.02517 | -0.60255 |
| C | 0.63927  | 4.10768 | 1.37139  |
| C | -0.7353  | 3.51452 | 1.0521   |
| C | -0.82326 | 2.12843 | 0.87309  |
| C | -2.0341  | 1.47415 | 0.58604  |
| C | -3.19726 | 2.2573  | 0.5403   |
| C | -3.13861 | 3.63526 | 0.73085  |
| C | -1.91401 | 4.25927 | 0.96827  |
| H | 4.33593  | 1.00666 | -1.10629 |
| H | 3.01752  | 4.91988 | 0.05063  |

|   |          |          |          |
|---|----------|----------|----------|
| H | 4.67523  | 3.45897  | -1.04209 |
| H | -4.14834 | 1.78594  | 0.32179  |
| H | -4.04796 | 4.2266   | 0.68225  |
| H | -1.88215 | 5.3355   | 1.09415  |
| C | 0.70622  | 5.60995  | 1.07263  |
| H | 0.50693  | 5.8228   | 0.01717  |
| H | -0.01734 | 6.16029  | 1.68101  |
| H | 1.69342  | 6.00663  | 1.32657  |
| C | 0.9241   | 3.88267  | 2.8812   |
| H | 0.17615  | 4.40361  | 3.48957  |
| H | 0.89439  | 2.8192   | 3.13731  |
| H | 1.91641  | 4.26854  | 3.14046  |
| O | 0.32299  | 1.36714  | 0.95454  |
| P | 2.04702  | -0.71239 | -0.11081 |
| P | -2.07552 | -0.30581 | 0.11017  |
| C | -3.72927 | -0.50046 | -0.65285 |
| C | -4.87735 | -0.81331 | 0.08683  |
| C | -3.82568 | -0.34347 | -2.04407 |
| C | -6.10628 | -0.96278 | -0.55754 |
| H | -4.80852 | -0.94692 | 1.16154  |
| C | -5.05658 | -0.48411 | -2.68263 |
| H | -2.93396 | -0.11925 | -2.62239 |
| C | -6.19816 | -0.7965  | -1.94076 |
| H | -6.99122 | -1.21118 | 0.02174  |
| H | -5.12104 | -0.36301 | -3.76024 |
| H | -7.15531 | -0.91717 | -2.44028 |
| C | -2.18517 | -1.19099 | 1.7046   |
| C | -2.44583 | -2.57099 | 1.68712  |
| C | -1.96819 | -0.54391 | 2.9274   |
| C | -2.5046  | -3.28229 | 2.88323  |
| H | -2.59086 | -3.07913 | 0.74186  |
| C | -2.01746 | -1.26446 | 4.12093  |
| H | -1.76303 | 0.52063  | 2.95196  |
| C | -2.28943 | -2.63246 | 4.10183  |
| H | -2.7098  | -4.34886 | 2.86216  |
| H | -1.8427  | -0.7541  | 5.06381  |
| H | -2.32996 | -3.19257 | 5.03212  |
| C | 3.53425  | -1.56412 | -0.75315 |
| C | 4.80329  | -1.42216 | -0.17065 |
| C | 3.36624  | -2.44427 | -1.83016 |
| C | 5.89077  | -2.12863 | -0.68032 |
| H | 4.93729  | -0.76966 | 0.68653  |
| C | 4.45658  | -3.15386 | -2.33671 |
| H | 2.37527  | -2.58546 | -2.25281 |
| C | 5.71924  | -2.99196 | -1.76656 |
| H | 6.87078  | -2.01281 | -0.22585 |
| H | 4.31546  | -3.83715 | -3.16915 |
| H | 6.56824  | -3.54489 | -2.15869 |
| C | 2.04375  | -1.11276 | 1.68476  |
| C | 2.78524  | -0.35108 | 2.60091  |
| C | 1.2867   | -2.20191 | 2.13754  |
| C | 2.77403  | -0.67996 | 3.95597  |
| H | 3.35935  | 0.50561  | 2.26241  |
| C | 1.28671  | -2.52694 | 3.49475  |
| H | 0.68219  | -2.7573  | 1.42464  |
| C | 2.02583  | -1.77066 | 4.40499  |
| H | 3.34766  | -0.08267 | 4.65984  |

|    |          |          |          |
|----|----------|----------|----------|
| H  | 0.68674  | -3.36334 | 3.83929  |
| H  | 2.01434  | -2.02339 | 5.462    |
| Pd | -0.12069 | -1.02912 | -0.97331 |
| C  | -0.75424 | 1.63573  | -2.40635 |
| C  | 0.08691  | 0.52548  | -2.2367  |
| C  | 1.12521  | 0.35961  | -3.17489 |
| C  | 1.30718  | 1.25234  | -4.23377 |
| C  | 0.46271  | 2.35345  | -4.37912 |
| C  | -0.56884 | 2.53723  | -3.4597  |
| H  | -1.57315 | 1.82129  | -1.72526 |
| H  | 1.81339  | -0.47535 | -3.08379 |
| H  | 2.12109  | 1.08849  | -4.93636 |
| H  | 0.60853  | 3.0569   | -5.19449 |
| H  | -1.24329 | 3.38526  | -3.55635 |
| C  | -2.32083 | -3.23741 | -2.00819 |
| O  | -1.78577 | -3.29646 | -3.01298 |
| F  | -0.246   | -2.95458 | -0.25186 |

### Ts6A

|   |          |          |          |
|---|----------|----------|----------|
| C | -3.65357 | 2.25212  | -0.65486 |
| C | -2.69531 | 1.39466  | -0.10127 |
| C | -3.04808 | 0.04777  | 0.06997  |
| C | -4.29733 | -0.46682 | -0.28056 |
| C | -5.21796 | 0.41603  | -0.85461 |
| C | -4.90134 | 1.76237  | -1.03797 |
| C | -4.59524 | -1.92673 | 0.06725  |
| C | -3.30175 | -2.72822 | -0.10114 |
| C | -2.09338 | -2.10853 | 0.22965  |
| C | -0.85582 | -2.77098 | 0.18823  |
| C | -0.85442 | -4.11996 | -0.1897  |
| C | -2.0423  | -4.76038 | -0.53363 |
| C | -3.25198 | -4.06743 | -0.49828 |
| H | -3.41156 | 3.29807  | -0.80649 |
| H | -6.19581 | 0.05697  | -1.1546  |
| H | -5.63301 | 2.43383  | -1.47715 |
| H | 0.08332  | -4.65961 | -0.24673 |
| H | -2.02493 | -5.80273 | -0.83693 |
| H | -4.16471 | -4.58202 | -0.776   |
| C | -5.73949 | -2.4968  | -0.78037 |
| H | -5.4977  | -2.4784  | -1.84811 |
| H | -5.9612  | -3.52788 | -0.49098 |
| H | -6.65858 | -1.92587 | -0.62117 |
| C | -5.00135 | -1.98255 | 1.56478  |
| H | -5.18931 | -3.01793 | 1.87023  |
| H | -4.21183 | -1.5749  | 2.20423  |
| H | -5.91181 | -1.39629 | 1.73245  |
| O | -2.08579 | -0.782   | 0.60935  |
| P | -0.96684 | 1.89567  | 0.24865  |
| P | 0.70282  | -1.82505 | 0.41659  |
| C | 2.04398  | -3.00448 | 0.04421  |
| C | 2.32155  | -4.09652 | 0.8818   |
| C | 2.83094  | -2.78734 | -1.09291 |
| C | 3.35868  | -4.97164 | 0.56575  |
| H | 1.73387  | -4.25342 | 1.7812   |
| C | 3.86682  | -3.66678 | -1.40763 |
| H | 2.64756  | -1.91546 | -1.7122  |
| C | 4.12898  | -4.75957 | -0.58138 |

|    |          |          |          |
|----|----------|----------|----------|
| H  | 3.57149  | -5.81403 | 1.2177   |
| H  | 4.47864  | -3.48527 | -2.28627 |
| H  | 4.94152  | -5.43947 | -0.82134 |
| C  | 0.84068  | -1.55357 | 2.22302  |
| C  | 2.10576  | -1.27255 | 2.76227  |
| C  | -0.27414 | -1.61125 | 3.07025  |
| C  | 2.24785  | -1.06229 | 4.1322   |
| H  | 2.9725   | -1.21749 | 2.11407  |
| C  | -0.12311 | -1.39879 | 4.43954  |
| H  | -1.2571  | -1.82707 | 2.67239  |
| C  | 1.13622  | -1.12551 | 4.97399  |
| H  | 3.23193  | -0.84575 | 4.538    |
| H  | -0.9943  | -1.44151 | 5.0864   |
| H  | 1.24933  | -0.95642 | 6.04125  |
| C  | -0.91233 | 3.67438  | -0.18313 |
| C  | -1.54008 | 4.6604   | 0.59316  |
| C  | -0.19747 | 4.0476   | -1.32888 |
| C  | -1.46753 | 5.99931  | 0.21335  |
| H  | -2.07635 | 4.3782   | 1.49409  |
| C  | -0.12757 | 5.38944  | -1.70689 |
| H  | 0.31599  | 3.28756  | -1.9096  |
| C  | -0.76392 | 6.36456  | -0.93826 |
| H  | -1.95334 | 6.75949  | 0.81868  |
| H  | 0.43419  | 5.67194  | -2.5927  |
| H  | -0.7037  | 7.4099   | -1.22782 |
| C  | -0.91553 | 1.9048   | 2.086    |
| C  | -2.08568 | 1.82432  | 2.85536  |
| C  | 0.32285  | 2.05121  | 2.72921  |
| C  | -2.0183  | 1.89825  | 4.24718  |
| H  | -3.05047 | 1.71292  | 2.37201  |
| C  | 0.38129  | 2.13003  | 4.11945  |
| H  | 1.23443  | 2.08616  | 2.14475  |
| C  | -0.78574 | 2.05568  | 4.88142  |
| H  | -2.93163 | 1.8372   | 4.83306  |
| H  | 1.34645  | 2.23516  | 4.60536  |
| H  | -0.73395 | 2.1123   | 5.96529  |
| Pd | 0.62457  | 0.2348   | -0.68973 |
| C  | -0.3804  | -1.74266 | -2.69932 |
| C  | -0.56906 | -0.47013 | -2.13846 |
| C  | -1.4667  | 0.40083  | -2.7753  |
| C  | -2.17811 | 0.00187  | -3.90931 |
| C  | -2.00184 | -1.27558 | -4.43966 |
| C  | -1.0908  | -2.14067 | -3.83501 |
| H  | 0.32465  | -2.4433  | -2.27131 |
| H  | -1.61476 | 1.40732  | -2.4089  |
| H  | -2.8699  | 0.70079  | -4.3724  |
| H  | -2.56038 | -1.58953 | -5.31704 |
| H  | -0.92516 | -3.13549 | -4.24056 |
| C  | 1.39455  | 1.41111  | -3.39503 |
| O  | 1.63411  | 1.00749  | -4.43153 |
| S  | 3.75768  | 1.05029  | 0.4382   |
| O  | 4.18706  | -0.35507 | 0.53707  |
| O  | 4.45991  | 2.04699  | 1.2526   |
| C  | 4.16729  | 1.49322  | -1.31992 |
| F  | 3.72885  | 0.52891  | -2.15912 |
| F  | 5.48871  | 1.61013  | -1.47931 |
| F  | 3.58763  | 2.64923  | -1.67837 |

O 2.25808 1.24626 0.48111

## CO

C 0. 0. -0.65  
O 0. 0. 0.4875

## Int3

C 1.73943 3.19987 -1.55866  
C 0.93934 2.30286 -0.83837  
C -0.4083 2.62984 -0.68199  
C -0.99843 3.78726 -1.194  
C -0.17571 4.64635 -1.92791  
C 1.17847 4.35379 -2.10742  
C -2.47048 4.03659 -0.84451  
C -3.17497 2.67706 -0.89564  
C -2.4575 1.56642 -0.4434  
C -2.93548 0.25738 -0.479  
C -4.25402 0.0696 -0.92066  
C -5.01743 1.15922 -1.33656  
C -4.4782 2.44891 -1.34348  
H 2.79458 2.99502 -1.69337  
H -0.58498 5.55462 -2.35672  
H 1.80516 5.03618 -2.67362  
H -4.6691 -0.93045 -0.9652  
H -6.03532 1.00122 -1.68031  
H -5.08113 3.27542 -1.70331  
C -3.12154 5.05959 -1.78192  
H -3.09901 4.72708 -2.82496  
H -4.1631 5.23593 -1.49729  
H -2.60949 6.02417 -1.71414  
C -2.53501 4.57162 0.61126  
H -3.57758 4.72278 0.91257  
H -2.07339 3.87126 1.31376  
H -2.00761 5.52921 0.68584  
O -1.17365 1.73506 0.03187  
P 1.5516 0.76161 -0.03269  
P -1.76295 -1.11518 -0.10077  
C -2.63308 -2.51272 -0.90024  
C -3.6053 -3.27459 -0.24369  
C -2.3418 -2.77444 -2.24572  
C -4.28506 -4.28382 -0.9293  
H -3.83034 -3.08269 0.80055  
C -3.02602 -3.77625 -2.92964  
H -1.563 -2.20431 -2.74409  
C -3.99933 -4.53323 -2.27201  
H -5.03647 -4.87436 -0.41225  
H -2.78907 -3.97819 -3.97042  
H -4.52684 -5.32064 -2.80327  
C -1.96102 -1.40526 1.69676  
C -1.33529 -2.54032 2.24298  
C -2.62685 -0.50907 2.53924  
C -1.39493 -2.77297 3.61538  
H -0.8073 -3.22334 1.583  
C -2.67173 -0.74245 3.9153  
H -3.10979 0.37064 2.12612  
C -2.0607 -1.87431 4.45505

|    |          |          |          |
|----|----------|----------|----------|
| H  | -0.91598 | -3.65568 | 4.03022  |
| H  | -3.18772 | -0.03912 | 4.56307  |
| H  | -2.101   | -2.05664 | 5.52554  |
| C  | 3.36126  | 0.9535   | -0.26179 |
| C  | 4.20233  | 1.38198  | 0.76981  |
| C  | 3.91195  | 0.63965  | -1.51385 |
| C  | 5.57904  | 1.48292  | 0.55613  |
| H  | 3.79055  | 1.62454  | 1.74315  |
| C  | 5.28332  | 0.74489  | -1.72505 |
| H  | 3.26865  | 0.28208  | -2.3108  |
| C  | 6.12149  | 1.16272  | -0.68736 |
| H  | 6.22539  | 1.80677  | 1.36713  |
| H  | 5.7      | 0.48208  | -2.69281 |
| H  | 7.1936   | 1.23108  | -0.84874 |
| C  | 1.27264  | 1.1146   | 1.74693  |
| C  | 1.2361   | 2.4245   | 2.24638  |
| C  | 1.08598  | 0.03885  | 2.6255   |
| C  | 1.01222  | 2.65162  | 3.60382  |
| H  | 1.37622  | 3.26573  | 1.57477  |
| C  | 0.86591  | 0.26914  | 3.98343  |
| H  | 1.0845   | -0.97603 | 2.24152  |
| C  | 0.82559  | 1.57461  | 4.4738   |
| H  | 0.98052  | 3.67002  | 3.98108  |
| H  | 0.70349  | -0.57296 | 4.64792  |
| H  | 0.6433   | 1.75431  | 5.52967  |
| Pd | 0.67409  | -1.31552 | -0.4636  |
| C  | 2.55038  | -2.02611 | -0.66392 |
| C  | 2.90067  | -2.54862 | -1.91447 |
| C  | 3.47265  | -2.10296 | 0.38448  |
| C  | 4.16809  | -3.10026 | -2.12353 |
| H  | 2.18426  | -2.5259  | -2.73192 |
| C  | 4.73672  | -2.6632  | 0.17883  |
| H  | 3.22648  | -1.70107 | 1.36362  |
| C  | 5.0927   | -3.15334 | -1.07846 |
| H  | 4.42938  | -3.49392 | -3.10348 |
| H  | 5.44618  | -2.70557 | 1.00215  |
| H  | 6.07947  | -3.5792  | -1.24093 |
| F  | 0.10883  | -3.25237 | -0.52962 |

### Int3A

|   |          |          |          |
|---|----------|----------|----------|
| C | -3.68401 | 1.95311  | -0.76086 |
| C | -2.67177 | 1.19138  | -0.16685 |
| C | -2.94123 | -0.16025 | 0.09989  |
| C | -4.17568 | -0.75634 | -0.16351 |
| C | -5.15543 | 0.03218  | -0.77535 |
| C | -4.91096 | 1.37204  | -1.07665 |
| C | -4.38924 | -2.18959 | 0.32601  |
| C | -3.07351 | -2.94931 | 0.13917  |
| C | -1.87589 | -2.25497 | 0.34548  |
| C | -0.61287 | -2.86383 | 0.24121  |
| C | -0.58132 | -4.23641 | -0.04611 |
| C | -1.75826 | -4.95217 | -0.24734 |
| C | -2.99275 | -4.30961 | -0.16858 |
| H | -3.50252 | 2.99641  | -0.99292 |
| H | -6.12235 | -0.39653 | -1.01223 |
| H | -5.68446 | 1.96849  | -1.55081 |
| H | 0.37259  | -4.73909 | -0.14776 |

|   |          |          |          |
|---|----------|----------|----------|
| H | -1.71237 | -6.01222 | -0.47765 |
| H | -3.89893 | -4.87807 | -0.34296 |
| C | -5.55923 | -2.8753  | -0.39079 |
| H | -5.38821 | -2.94435 | -1.47005 |
| H | -5.71749 | -3.88367 | 0.00185  |
| H | -6.49006 | -2.32658 | -0.22072 |
| C | -4.69864 | -2.13017 | 1.84655  |
| H | -4.82913 | -3.14148 | 2.24762  |
| H | -3.88612 | -1.64672 | 2.39779  |
| H | -5.61813 | -1.56132 | 2.02444  |
| O | -1.92254 | -0.90977 | 0.65817  |
| P | -0.99068 | 1.82818  | 0.17199  |
| P | 0.93677  | -1.8635  | 0.25057  |
| C | 2.23086  | -3.00898 | -0.33163 |
| C | 2.73425  | -4.04054 | 0.47588  |
| C | 2.73471  | -2.83365 | -1.62634 |
| C | 3.71713  | -4.89662 | -0.01768 |
| H | 2.36279  | -4.1653  | 1.48833  |
| C | 3.71412  | -3.69583 | -2.11855 |
| H | 2.37534  | -2.00972 | -2.23402 |
| C | 4.20424  | -4.72722 | -1.31657 |
| H | 4.10678  | -5.69133 | 0.61214  |
| H | 4.10588  | -3.54932 | -3.12078 |
| H | 4.97433  | -5.39218 | -1.69733 |
| C | 1.32137  | -1.57554 | 2.01425  |
| C | 2.64927  | -1.31764 | 2.38917  |
| C | 0.30522  | -1.50639 | 2.97661  |
| C | 2.95206  | -1.01208 | 3.71407  |
| H | 3.43793  | -1.34501 | 1.64573  |
| C | 0.61576  | -1.19986 | 4.30034  |
| H | -0.72662 | -1.67951 | 2.69696  |
| C | 1.93775  | -0.95281 | 4.67212  |
| H | 3.98219  | -0.81063 | 3.99309  |
| H | -0.17978 | -1.14272 | 5.0368   |
| H | 2.17645  | -0.70806 | 5.70341  |
| C | -1.02521 | 3.5948   | -0.29991 |
| C | -1.82089 | 4.53097  | 0.3792   |
| C | -0.19226 | 4.02268  | -1.34166 |
| C | -1.79961 | 5.87134  | -0.00025 |
| H | -2.44538 | 4.21013  | 1.20774  |
| C | -0.17123 | 5.36682  | -1.71761 |
| H | 0.45318  | 3.30745  | -1.84112 |
| C | -0.9774  | 6.28957  | -1.05114 |
| H | -2.41711 | 6.59208  | 0.5283   |
| H | 0.48317  | 5.69105  | -2.52142 |
| H | -0.95799 | 7.33656  | -1.34    |
| C | -0.92311 | 1.88282  | 2.00694  |
| C | -2.0518  | 1.62706  | 2.79875  |
| C | 0.2903   | 2.22151  | 2.62486  |
| C | -1.96711 | 1.71079  | 4.1891   |
| H | -2.99804 | 1.37012  | 2.33538  |
| C | 0.36659  | 2.30558  | 4.01358  |
| H | 1.17619  | 2.38542  | 2.02378  |
| C | -0.75937 | 2.05242  | 4.79905  |
| H | -2.84852 | 1.51251  | 4.79307  |
| H | 1.31489  | 2.55501  | 4.47999  |
| H | -0.69449 | 2.11486  | 5.88188  |



|    |          |          |          |
|----|----------|----------|----------|
| Pd | 0.60213  | 0.26784  | -0.67123 |
| C  | -0.64655 | -1.61143 | -2.70236 |
| C  | -0.5605  | -0.30239 | -2.20591 |
| C  | -1.16739 | 0.72163  | -2.95511 |
| C  | -1.83714 | 0.44517  | -4.14933 |
| C  | -1.92608 | -0.8635  | -4.62232 |
| C  | -1.32324 | -1.88782 | -3.89445 |
| H  | -0.19132 | -2.44019 | -2.1793  |
| H  | -1.12812 | 1.75159  | -2.62077 |
| H  | -2.29675 | 1.26183  | -4.70047 |
| H  | -2.45636 | -1.08094 | -5.54533 |
| H  | -1.37062 | -2.91481 | -4.24815 |
| S  | 3.67015  | 1.1731   | 0.02436  |
| O  | 4.05169  | -0.16092 | -0.47029 |
| O  | 4.62469  | 1.898    | 0.86884  |
| C  | 3.53113  | 2.20537  | -1.51884 |
| F  | 2.66075  | 1.64777  | -2.39481 |
| F  | 4.71531  | 2.31505  | -2.12738 |
| F  | 3.07907  | 3.43496  | -1.22862 |
| O  | 2.25627  | 1.24071  | 0.56226  |

### MeOPhB(OH)<sub>2</sub>

|   |          |          |          |
|---|----------|----------|----------|
| C | -1.60697 | -0.2077  | 0.27566  |
| C | -0.21181 | -0.2077  | 0.27566  |
| C | 0.48572  | 1.00005  | 0.27566  |
| C | -0.21193 | 2.20856  | 0.27446  |
| C | -1.60676 | 2.20848  | 0.27398  |
| C | -2.30436 | 1.00027  | 0.27498  |
| H | -2.15673 | -1.16002 | 0.27611  |
| H | 1.5854   | 1.00013  | 0.2763   |
| H | 0.33827  | 3.1607   | 0.2744   |
| H | -3.40396 | 1.00046  | 0.2748   |
| O | -2.32207 | 3.44671  | 0.27274  |
| C | -2.55899 | 3.85977  | -1.07565 |
| H | -3.09545 | 4.78557  | -1.07604 |
| H | -1.62349 | 3.98941  | -1.57856 |
| H | -3.13532 | 3.11338  | -1.58127 |
| B | 0.61271  | -1.63692 | 0.27763  |
| O | 0.9967   | -2.3025  | 1.61223  |
| H | 1.46865  | -3.12021 | 1.43842  |
| O | 0.99827  | -2.30528 | -1.05512 |
| H | 1.47027  | -3.12247 | -0.87905 |

### Ts7

|   |          |          |         |
|---|----------|----------|---------|
| C | -3.44051 | -2.30219 | 1.3975  |
| C | -2.63014 | -1.28649 | 0.88882 |
| C | -2.44501 | -0.12542 | 1.65959 |
| C | -3.05846 | 0.06318  | 2.8965  |
| C | -3.86528 | -0.97941 | 3.37232 |
| C | -4.05408 | -2.14911 | 2.64175 |
| C | -2.87097 | 1.35207  | 3.6951  |
| C | -1.88983 | 2.28777  | 2.98403 |
| C | -1.30013 | 1.9577   | 1.75975 |
| C | -0.33018 | 2.76211  | 1.13462 |
| C | -0.0137  | 3.98501  | 1.73838 |
| C | -0.61915 | 4.36866  | 2.93405 |

|   |          |          |          |
|---|----------|----------|----------|
| C | -1.5329  | 3.5169   | 3.55144  |
| H | -3.58876 | -3.21081 | 0.82509  |
| H | -4.35665 | -0.86982 | 4.33415  |
| H | -4.68218 | -2.94118 | 3.03773  |
| H | 0.72671  | 4.62779  | 1.27419  |
| H | -0.36911 | 5.3213   | 3.39149  |
| H | -1.98003 | 3.81202  | 4.4958   |
| C | -2.31239 | 1.0018   | 5.09427  |
| H | -1.35868 | 0.47449  | 5.00197  |
| H | -2.15542 | 1.90521  | 5.69219  |
| H | -3.00765 | 0.35789  | 5.64245  |
| C | -4.23926 | 2.05917  | 3.84085  |
| H | -4.14302 | 2.98165  | 4.42309  |
| H | -4.64981 | 2.31688  | 2.85896  |
| H | -4.95921 | 1.41223  | 4.35343  |
| O | -1.63432 | 0.81283  | 1.08491  |
| P | -1.73455 | -1.4022  | -0.70004 |
| P | 0.54725  | 2.0989   | -0.35671 |
| C | 2.21513  | 2.86427  | -0.09054 |
| C | 2.93045  | 3.51383  | -1.10589 |
| C | 2.86348  | 2.6436   | 1.13874  |
| C | 4.25209  | 3.91889  | -0.90457 |
| H | 2.45631  | 3.7114   | -2.06036 |
| C | 4.17914  | 3.05561  | 1.343    |
| H | 2.33401  | 2.15042  | 1.94795  |
| C | 4.88475  | 3.68933  | 0.31727  |
| H | 4.7842   | 4.42233  | -1.7076  |
| H | 4.65348  | 2.87721  | 2.30453  |
| H | 5.91279  | 4.00488  | 0.47149  |
| C | -0.15235 | 3.11041  | -1.72957 |
| C | 0.3319   | 2.86873  | -3.02835 |
| C | -1.16995 | 4.05736  | -1.55408 |
| C | -0.1489  | 3.60618  | -4.10982 |
| H | 1.0844   | 2.10078  | -3.18103 |
| C | -1.6724  | 4.76864  | -2.6454  |
| H | -1.57026 | 4.24465  | -0.56347 |
| C | -1.15354 | 4.55809  | -3.92333 |
| H | 0.25038  | 3.42163  | -5.1039  |
| H | -2.46405 | 5.49745  | -2.49167 |
| H | -1.53586 | 5.12371  | -4.76885 |
| C | -2.34745 | -2.96654 | -1.43542 |
| C | -1.47843 | -4.06331 | -1.51082 |
| C | -3.65677 | -3.09051 | -1.92302 |
| C | -1.91594 | -5.27326 | -2.05169 |
| H | -0.45753 | -3.95322 | -1.15498 |
| C | -4.0913  | -4.29932 | -2.46421 |
| H | -4.33049 | -2.23992 | -1.88337 |
| C | -3.22248 | -5.39249 | -2.52693 |
| H | -1.23434 | -6.11727 | -2.10853 |
| H | -5.10625 | -4.3878  | -2.84139 |
| H | -3.56282 | -6.33222 | -2.95272 |
| C | -2.50544 | -0.11575 | -1.75006 |
| C | -3.67899 | 0.5577   | -1.38581 |
| C | -1.89021 | 0.17998  | -2.97455 |
| C | -4.22779 | 1.51686  | -2.23654 |
| H | -4.16167 | 0.33732  | -0.43939 |
| C | -2.45315 | 1.12672  | -3.82811 |

|    |          |          |          |
|----|----------|----------|----------|
| H  | -0.96337 | -0.31343 | -3.24939 |
| C  | -3.61661 | 1.80226  | -3.45845 |
| H  | -5.13191 | 2.0428   | -1.94213 |
| H  | -1.96502 | 1.35717  | -4.76876 |
| H  | -4.03905 | 2.55579  | -4.1164  |
| Pd | 0.59308  | -1.38279 | -0.65831 |
| C  | 0.55108  | -1.71038 | 1.30565  |
| C  | 0.89019  | -0.67234 | 2.18031  |
| C  | 0.16492  | -2.9445  | 1.84374  |
| C  | 0.82679  | -0.85436 | 3.56361  |
| H  | 1.19769  | 0.28495  | 1.77948  |
| C  | 0.10256  | -3.12724 | 3.22928  |
| H  | -0.10962 | -3.76634 | 1.18864  |
| C  | 0.42832  | -2.08313 | 4.09541  |
| H  | 1.09151  | -0.03139 | 4.22406  |
| H  | -0.20945 | -4.08994 | 3.62764  |
| H  | 0.37449  | -2.22496 | 5.17149  |
| F  | 1.18034  | -1.24025 | -2.90953 |
| C  | 3.14952  | -2.97324 | -0.59417 |
| C  | 2.74448  | -1.61341 | -0.66023 |
| C  | 3.54199  | -0.70725 | 0.0653   |
| C  | 4.67235  | -1.09017 | 0.78514  |
| C  | 5.03655  | -2.44282 | 0.81447  |
| C  | 4.26636  | -3.38819 | 0.11432  |
| H  | 2.56624  | -3.72921 | -1.11973 |
| H  | 3.27904  | 0.34511  | 0.05474  |
| H  | 5.25319  | -0.34122 | 1.31176  |
| H  | 4.56577  | -4.43157 | 0.15553  |
| O  | 6.11357  | -2.93691 | 1.4803   |
| C  | 6.90687  | -2.03084 | 2.23394  |
| H  | 7.69456  | -2.6323  | 2.69231  |
| H  | 7.36333  | -1.26547 | 1.59321  |
| H  | 6.31954  | -1.54169 | 3.02153  |
| B  | 2.51808  | -0.82587 | -2.60362 |
| O  | 3.53504  | -1.4757  | -3.29543 |
| H  | 3.48011  | -2.43362 | -3.17651 |
| O  | 2.58444  | 0.56174  | -2.5066  |
| H  | 3.49777  | 0.85333  | -2.3782  |

### **FB(OH)<sub>2</sub>**

|   |          |          |          |
|---|----------|----------|----------|
| B | 0.61271  | -1.63692 | 0.27763  |
| O | 0.9967   | -2.3025  | 1.61223  |
| H | 1.46865  | -3.12021 | 1.43842  |
| O | 0.99827  | -2.30528 | -1.05512 |
| H | 1.47027  | -3.12247 | -0.87905 |
| F | -0.11687 | -0.37228 | 0.27589  |

### **Int4**

|   |          |          |          |
|---|----------|----------|----------|
| C | -3.94437 | 1.05378  | -1.9187  |
| C | -2.95834 | 0.42181  | -1.146   |
| C | -3.00294 | -0.97188 | -1.07621 |
| C | -3.93439 | -1.75926 | -1.76059 |
| C | -4.88143 | -1.09315 | -2.54194 |
| C | -4.89154 | 0.30136  | -2.61185 |
| C | -3.87994 | -3.27454 | -1.544   |
| C | -2.4037  | -3.66177 | -1.4241  |

|   |          |          |          |
|---|----------|----------|----------|
| C | -1.55755 | -2.77334 | -0.7556  |
| C | -0.20168 | -3.01198 | -0.52368 |
| C | 0.32217  | -4.23351 | -0.9692  |
| C | -0.49165 | -5.14255 | -1.64439 |
| C | -1.83949 | -4.85792 | -1.87607 |
| H | -3.95838 | 2.1343   | -1.9922  |
| H | -5.62398 | -1.65936 | -3.0931  |
| H | -5.64261 | 0.80529  | -3.21295 |
| H | 1.36767  | -4.46291 | -0.80126 |
| H | -0.07294 | -6.08182 | -1.99334 |
| H | -2.45136 | -5.57974 | -2.40581 |
| C | -4.58895 | -4.04576 | -2.66364 |
| H | -4.13289 | -3.85471 | -3.64069 |
| H | -4.55635 | -5.12207 | -2.47038 |
| H | -5.64604 | -3.76876 | -2.71442 |
| C | -4.5756  | -3.59441 | -0.19357 |
| H | -4.52146 | -4.66869 | 0.01578  |
| H | -4.10085 | -3.05843 | 0.6338   |
| H | -5.62965 | -3.29759 | -0.2312  |
| O | -2.05408 | -1.57814 | -0.28068 |
| P | -1.64414 | 1.31263  | -0.19192 |
| P | 0.78768  | -1.68748 | 0.29248  |
| C | 2.46546  | -2.43105 | 0.21963  |
| C | 3.07472  | -3.06522 | 1.30786  |
| C | 3.16201  | -2.33679 | -0.99461 |
| C | 4.37007  | -3.57477 | 1.19059  |
| H | 2.54639  | -3.15674 | 2.25035  |
| C | 4.45201  | -2.84604 | -1.10996 |
| H | 2.70152  | -1.83934 | -1.84081 |
| C | 5.06303  | -3.46045 | -0.01381 |
| H | 4.83633  | -4.05762 | 2.04508  |
| H | 4.98703  | -2.74698 | -2.04975 |
| H | 6.07604  | -3.84346 | -0.09917 |
| C | 0.32595  | -1.85897 | 2.06613  |
| C | 0.99818  | -1.05039 | 2.99826  |
| C | -0.68177 | -2.71776 | 2.51779  |
| C | 0.67413  | -1.10797 | 4.35205  |
| H | 1.77788  | -0.37729 | 2.6587   |
| C | -1.01858 | -2.76092 | 3.87256  |
| H | -1.20455 | -3.3597  | 1.81754  |
| C | -0.34261 | -1.95999 | 4.79253  |
| H | 1.20954  | -0.48165 | 5.06029  |
| H | -1.80894 | -3.42706 | 4.20706  |
| H | -0.60354 | -1.99928 | 5.84636  |
| C | -1.80993 | 2.99771  | -0.90062 |
| C | -2.02988 | 4.12569  | -0.10462 |
| C | -1.57821 | 3.1657   | -2.27504 |
| C | -2.02522 | 5.40006  | -0.67473 |
| H | -2.18449 | 4.0156   | 0.96251  |
| C | -1.59466 | 4.43595  | -2.84517 |
| H | -1.38239 | 2.29809  | -2.89975 |
| C | -1.81543 | 5.55883  | -2.0438  |
| H | -2.17962 | 6.26914  | -0.04175 |
| H | -1.42065 | 4.55074  | -3.91156 |
| H | -1.81335 | 6.55197  | -2.48414 |
| C | -2.44478 | 1.4275   | 1.45752  |
| C | -3.78994 | 1.79933  | 1.60438  |

|    |          |          |          |
|----|----------|----------|----------|
| C  | -1.69394 | 1.11271  | 2.5944   |
| C  | -4.36605 | 1.8624   | 2.8713   |
| H  | -4.3854  | 2.03752  | 0.72838  |
| C  | -2.27249 | 1.17086  | 3.86311  |
| H  | -0.66145 | 0.80785  | 2.48059  |
| C  | -3.60773 | 1.54774  | 4.00321  |
| H  | -5.40773 | 2.15294  | 2.97667  |
| H  | -1.67898 | 0.91025  | 4.73389  |
| H  | -4.0611  | 1.5927   | 4.98966  |
| Pd | 0.72581  | 0.72475  | -0.10615 |
| C  | 1.0917   | 2.72109  | 0.1616   |
| C  | 1.3633   | 3.60857  | -0.88842 |
| C  | 1.02621  | 3.24917  | 1.46015  |
| C  | 1.52521  | 4.97598  | -0.65968 |
| H  | 1.44126  | 3.23342  | -1.90478 |
| C  | 1.1899   | 4.61868  | 1.69705  |
| H  | 0.8349   | 2.59473  | 2.30673  |
| C  | 1.43534  | 5.49017  | 0.63623  |
| H  | 1.71813  | 5.64246  | -1.4974  |
| H  | 1.12528  | 5.00037  | 2.71419  |
| H  | 1.55986  | 6.55517  | 0.81541  |
| C  | 2.76208  | 0.73874  | -0.31437 |
| C  | 3.26719  | 0.8406   | -1.61566 |
| C  | 3.7012   | 0.59117  | 0.71783  |
| C  | 4.63636  | 0.74229  | -1.89903 |
| H  | 2.58549  | 0.99     | -2.45105 |
| C  | 5.06581  | 0.48767  | 0.46182  |
| H  | 3.37343  | 0.545    | 1.75285  |
| C  | 5.54227  | 0.54888  | -0.85289 |
| H  | 4.97438  | 0.81609  | -2.92716 |
| H  | 5.78097  | 0.35273  | 1.26842  |
| O  | 6.89866  | 0.41664  | -1.00789 |
| C  | 7.41309  | 0.45744  | -2.3245  |
| H  | 7.2143   | 1.42168  | -2.81269 |
| H  | 8.49345  | 0.32042  | -2.234   |
| H  | 7.00059  | -0.34815 | -2.94876 |

## Ts8

|   |          |          |          |
|---|----------|----------|----------|
| C | -3.85618 | 0.96224  | -2.12589 |
| C | -2.92172 | 0.37079  | -1.26456 |
| C | -2.94989 | -1.02297 | -1.15482 |
| C | -3.82483 | -1.84559 | -1.86866 |
| C | -4.72099 | -1.21952 | -2.73992 |
| C | -4.73983 | 0.17144  | -2.86126 |
| C | -3.77759 | -3.34935 | -1.58014 |
| C | -2.31187 | -3.72279 | -1.33784 |
| C | -1.5118  | -2.79766 | -0.66071 |
| C | -0.16745 | -3.01341 | -0.3421  |
| C | 0.38262  | -4.25432 | -0.69503 |
| C | -0.3876  | -5.20312 | -1.36597 |
| C | -1.71919 | -4.93715 | -1.69413 |
| H | -3.8843  | 2.04042  | -2.22965 |
| H | -5.41735 | -1.81447 | -3.32051 |
| H | -5.45217 | 0.64346  | -3.53166 |
| H | 1.41897  | -4.46743 | -0.46002 |
| H | 0.05333  | -6.15709 | -1.64007 |
| H | -2.29508 | -5.68672 | -2.22566 |

|    |          |          |          |
|----|----------|----------|----------|
| C  | -4.40388 | -4.17413 | -2.71076 |
| H  | -3.87857 | -4.02597 | -3.66007 |
| H  | -4.38529 | -5.24045 | -2.46706 |
| H  | -5.45447 | -3.90277 | -2.85023 |
| C  | -4.56729 | -3.61129 | -0.26958 |
| H  | -4.52058 | -4.67355 | -0.00432 |
| H  | -4.15722 | -3.03087 | 0.56244  |
| H  | -5.61814 | -3.32794 | -0.39715 |
| O  | -2.04681 | -1.58568 | -0.27764 |
| P  | -1.65389 | 1.27183  | -0.2675  |
| P  | 0.80131  | -1.62038 | 0.38672  |
| C  | 2.49483  | -2.33109 | 0.33543  |
| C  | 3.09156  | -3.01528 | 1.40218  |
| C  | 3.2091   | -2.17647 | -0.86126 |
| C  | 4.38576  | -3.52394 | 1.2764   |
| H  | 2.54813  | -3.1506  | 2.33134  |
| C  | 4.49513  | -2.69567 | -0.98965 |
| H  | 2.7639   | -1.62375 | -1.68157 |
| C  | 5.0898   | -3.36495 | 0.08175  |
| H  | 4.84187  | -4.04698 | 2.1127   |
| H  | 5.0424   | -2.55664 | -1.91718 |
| H  | 6.09978  | -3.75419 | -0.01189 |
| C  | 0.3674   | -1.68535 | 2.17338  |
| C  | 1.13897  | -0.91777 | 3.06303  |
| C  | -0.7335  | -2.39099 | 2.67052  |
| C  | 0.82461  | -0.87238 | 4.41893  |
| H  | 1.99512  | -0.36565 | 2.68818  |
| C  | -1.05919 | -2.32924 | 4.02708  |
| H  | -1.34    | -2.99345 | 2.00355  |
| C  | -0.28148 | -1.57559 | 4.9052   |
| H  | 1.43899  | -0.28352 | 5.09485  |
| H  | -1.92215 | -2.87664 | 4.39593  |
| H  | -0.53434 | -1.53357 | 5.96092  |
| C  | -1.92133 | 3.00268  | -0.81969 |
| C  | -2.29078 | 4.02543  | 0.06013  |
| C  | -1.64133 | 3.32567  | -2.15806 |
| C  | -2.39382 | 5.3423   | -0.39248 |
| H  | -2.49116 | 3.79763  | 1.10128  |
| C  | -1.77307 | 4.63476  | -2.61503 |
| H  | -1.32277 | 2.54476  | -2.84414 |
| C  | -2.1476  | 5.64927  | -1.73012 |
| H  | -2.67128 | 6.128    | 0.30479  |
| H  | -1.56642 | 4.86625  | -3.65647 |
| H  | -2.23641 | 6.67371  | -2.08102 |
| C  | -2.42788 | 1.22918  | 1.40076  |
| C  | -3.81791 | 1.18688  | 1.58075  |
| C  | -1.59357 | 1.25218  | 2.52526  |
| C  | -4.36115 | 1.16679  | 2.86486  |
| H  | -4.47462 | 1.16747  | 0.71654  |
| C  | -2.13827 | 1.24147  | 3.80943  |
| H  | -0.51899 | 1.26881  | 2.38745  |
| C  | -3.52209 | 1.19564  | 3.98159  |
| H  | -5.43959 | 1.1298   | 2.99368  |
| H  | -1.47894 | 1.25057  | 4.6714   |
| H  | -3.94662 | 1.1783   | 4.98173  |
| Pd | 0.68454  | 0.71322  | -0.204   |
| C  | 1.46528  | 2.65714  | 0.03048  |

|   |         |          |          |
|---|---------|----------|----------|
| C | 1.35949 | 3.65508  | -0.95584 |
| C | 1.4763  | 3.07332  | 1.37831  |
| C | 1.2346  | 4.99914  | -0.6127  |
| H | 1.37169 | 3.3753   | -2.00484 |
| C | 1.3373  | 4.41821  | 1.72187  |
| H | 1.59615 | 2.33685  | 2.16863  |
| C | 1.2162  | 5.39248  | 0.72855  |
| H | 1.13675 | 5.7432   | -1.39875 |
| H | 1.33215 | 4.70507  | 2.77132  |
| H | 1.1151  | 6.44125  | 0.99347  |
| C | 2.73162 | 1.19464  | -0.40489 |
| C | 3.18022 | 1.16897  | -1.73594 |
| C | 3.68757 | 0.92096  | 0.59517  |
| C | 4.49868 | 0.83979  | -2.06894 |
| H | 2.49195 | 1.41512  | -2.5406  |
| C | 4.9991  | 0.59733  | 0.28294  |
| H | 3.40092 | 0.97234  | 1.64156  |
| C | 5.41483 | 0.54231  | -1.05566 |
| H | 4.79297 | 0.82217  | -3.1126  |
| H | 5.72116 | 0.36794  | 1.06093  |
| O | 6.72182 | 0.19388  | -1.26282 |
| C | 7.17956 | 0.12802  | -2.60062 |
| H | 7.10443 | 1.10087  | -3.10542 |
| H | 8.23009 | -0.16708 | -2.54803 |
| H | 6.62548 | -0.61985 | -3.18507 |

## Product

|   |          |          |          |
|---|----------|----------|----------|
| C | -0.56134 | 0.39711  | 1.48409  |
| C | -0.21155 | -0.20755 | 0.2764   |
| C | -0.5579  | 0.3964   | -0.93212 |
| C | -1.25542 | 1.60498  | -0.9333  |
| C | -1.60551 | 2.2092   | 0.27413  |
| C | -1.25812 | 1.60543  | 1.48293  |
| H | -0.28779 | -0.07899 | 2.43679  |
| H | -0.28167 | -0.07982 | -1.88407 |
| H | -1.52845 | 2.08095  | -1.8863  |
| H | -1.53405 | 2.08205  | 2.43469  |
| O | -2.32032 | 3.44772  | 0.27335  |
| C | -2.55767 | 3.86102  | -1.07489 |
| H | -3.09376 | 4.78705  | -1.07493 |
| H | -1.62234 | 3.99035  | -1.5782  |
| H | -3.13453 | 3.11493  | -1.58035 |
| C | 0.55869  | -1.54109 | 0.27815  |
| C | 0.90636  | -2.14421 | 1.48722  |
| C | 0.90865  | -2.14603 | -0.92896 |
| C | 1.60442  | -3.35165 | 1.48908  |
| H | 0.63098  | -1.66664 | 2.43871  |
| C | 1.60607  | -3.35435 | -0.92727 |
| H | 0.63456  | -1.67091 | -1.88199 |
| C | 1.9541   | -3.95714 | 0.28147  |
| H | 1.87904  | -3.82678 | 2.44204  |
| H | 1.8815   | -3.83129 | -1.87918 |
| H | 2.50445  | -4.90919 | 0.28319  |
